# Supplementary material for: Systematic Investigation of the Efficacy of Sinitang Decoction Against Ulcerative Colitis
Source: Front Pharmacol. 2020 Aug 31;11:1337. doi: 10.3389/fphar.2020.01337 (PMC7490561; doi:10.3389/fphar.2020.01337)
Supplement: Supplementary Table 3 — SNT-related differential protein regulation. [file DataSheet_2.xlsx]

## Sheet: Sheet1
				表一 原始数据 表二 将IBAQ数据均一化得iTOF,三组数据两两对比，求p值，筛选p<0.05出具有显著性差异 表三 根据表二筛选出的数据， 筛选趋势一致的数据，即C-M/S-M>0即为。后筛选C/M(M/C)和S/M(M/S)同时满足>2 <0.5的2倍差异值 表四 筛选上下调的蛋白，根据foldchangge>1,为上调

## Sheet: The original data
Protein IDs	Majority protein IDs	Peptide counts (all)	Peptide counts (razor+unique)	Peptide counts (unique)	Fasta headers	Number of proteins	Peptides	Razor + unique peptides	Unique peptides	Peptides 1_13per_F1_r1	Peptides 1_13per_F1_r2	Peptides 1_13per_F1_r3	Peptides 2_13per_F1_r1	Peptides 2_13per_F1_r2	Peptides 2_13per_F1_r3	Peptides 3_13per_F1_r1	Peptides 3_13per_F1_r2	Peptides 3_13per_F1_r3	Razor + unique peptides 1_13per_F1_r1	Razor + unique peptides 1_13per_F1_r2	Razor + unique peptides 1_13per_F1_r3	Razor + unique peptides 2_13per_F1_r1	Razor + unique peptides 2_13per_F1_r2	Razor + unique peptides 2_13per_F1_r3	Razor + unique peptides 3_13per_F1_r1	Razor + unique peptides 3_13per_F1_r2	Razor + unique peptides 3_13per_F1_r3	Unique peptides 1_13per_F1_r1	Unique peptides 1_13per_F1_r2	Unique peptides 1_13per_F1_r3	Unique peptides 2_13per_F1_r1	Unique peptides 2_13per_F1_r2	Unique peptides 2_13per_F1_r3	Unique peptides 3_13per_F1_r1	Unique peptides 3_13per_F1_r2	Unique peptides 3_13per_F1_r3	Sequence coverage [%]	Unique + razor sequence coverage [%]	Unique sequence coverage [%]	Mol. weight [kDa]	Sequence length	Sequence lengths	Fraction average	Fraction 1	Q-value	Score	Sequence coverage 1_13per_F1_r1 [%]	Sequence coverage 1_13per_F1_r2 [%]	Sequence coverage 1_13per_F1_r3 [%]
AP_004895.1	AP_004895.1	6	6	1	AP_004895.1 cytochrome c oxidase subunit II (mitochondrion) [Rattus norvegicus]	1	6	6	1	6	5	5	5	6	5	5	5	5	6	5	5	5	6	5	5	5	5	1	1	1	1	1	1	1	1	1	30.8	30.8	8.8	25.942	227	227	1	102	0	244.35	30.8	27.8	27.8
AP_004896.1;YP_665633.1	AP_004896.1;YP_665633.1	2;1	2;1	2;1	AP_004896.1 ATP synthase F0 subunit 8 (mitochondrion) [Rattus norvegicus];YP_665633.1 ATP synthase F0 subunit 8 (mitochondrion) [Rattus norvegicus]	2	2	2	2	1	1	2	2	2	2	2	2	2	1	1	2	2	2	2	2	2	2	1	1	2	2	2	2	2	2	2	34.3	34.3	34.3	7.6419	67	67;67	1	21	0	4.1281	14.9	14.9	34.3
NP_001001512.2;XP_017453859.1;XP_017453858.1;XP_017453857.1;XP_017453855.1;XP_017453854.1;XP_017453853.1;XP_017453852.1;XP_017453851.1;XP_017453850.1;XP_017453849.1;XP_017453856.1;XP_008767363.1;XP_006249232.1;XP_017453860.1;XP_008767353.2;NP_001258414.1	NP_001001512.2;XP_017453859.1;XP_017453858.1;XP_017453857.1;XP_017453855.1;XP_017453854.1;XP_017453853.1;XP_017453852.1;XP_017453851.1;XP_017453850.1;XP_017453849.1;XP_017453856.1;XP_008767363.1;XP_006249232.1	12;12;12;12;12;12;12;12;12;12;12;12;12;12;2;1;1	12;12;12;12;12;12;12;12;12;12;12;12;12;12;2;1;1	12;12;12;12;12;12;12;12;12;12;12;12;12;12;2;1;1	NP_001001512.2 general transcription factor II-I [Rattus norvegicus];XP_017453859.1 PREDICTED: general transcription factor II-I isoform X11 [Rattus norvegicus];XP_017453858.1 PREDICTED: general transcription factor II-I isoform X10 [Rattus norvegicus];XP_	17	12	12	12	4	3	1	6	3	5	8	5	5	4	3	1	6	3	5	8	5	5	4	3	1	6	3	5	8	5	5	15.4	15.4	15.4	103.02	913	913;932;934;939;953;958;960;977;978;979;998;999;999;999;274;980;980	1	43	0	64.059	5.7	4.3	1.4
NP_001001517.1;XP_008760737.1	NP_001001517.1;XP_008760737.1	2;1	2;1	2;1	NP_001001517.1 E3 ubiquitin-protein ligase RNF114 [Rattus norvegicus];XP_008760737.1 PREDICTED: E3 ubiquitin-protein ligase RNF114 isoform X1 [Rattus norvegicus]	2	2	2	2	1	1	1	1	2	1	2	2	2	1	1	1	1	2	1	2	2	2	1	1	1	1	2	1	2	2	2	12.2	12.2	12.2	25.664	229	229;250	1	16	0	17.877	7.9	7.9	7.9
NP_001002016.2	NP_001002016.2	52	52	50	NP_001002016.2 prelamin-A/C [Rattus norvegicus]	1	52	52	50	42	37	34	42	39	40	40	41	40	42	37	34	42	39	40	40	41	40	41	35	33	40	39	39	39	41	39	65.4	65.4	64.2	74.311	665	665	1	676	0	323.31	58.3	54	51.9
NP_001002023.1	NP_001002023.1	7	7	7	NP_001002023.1 epsilon-sarcoglycan [Rattus norvegicus]	1	7	7	7	1	4	3	2	1	3	2	3	1	1	4	3	2	1	3	2	3	1	1	4	3	2	1	3	2	3	1	26.3	26.3	26.3	49.84	437	437	1	23	0	110.19	4.8	15.1	15.3
NP_001002805.1;CON__ENSEMBL:ENSBTAP00000007350;CON__P01030	NP_001002805.1	29;4;3	3;1;0	3;1;0	NP_001002805.1 complement component 4, gene 2 precursor [Rattus norvegicus]	3	29	3	3	13	11	10	16	16	12	12	12	11	0	2	1	2	2	1	0	1	1	0	2	1	2	2	1	0	1	1	22.7	2.9	2.9	192.12	1737	1737;1742;1741	1	10	0	8.4313	12.1	11.5	10.5
NP_001002807.1;XP_008770967.1	NP_001002807.1;XP_008770967.1	6;5	6;5	6;5	NP_001002807.1 chloride intracellular channel protein 1 [Rattus norvegicus];XP_008770967.1 PREDICTED: chloride intracellular channel protein 1 isoform X1 [Rattus norvegicus]	2	6	6	6	4	6	5	5	6	6	5	6	6	4	6	5	5	6	6	5	6	6	4	6	5	5	6	6	5	6	6	37.3	37.3	37.3	26.98	241	241;225	1	74	0	120.91	27.4	37.3	32.4
NP_001002819.2	NP_001002819.2	15	7	7	NP_001002819.2 glutamine--fructose-6-phosphate aminotransferase [isomerizing] 2 [Rattus norvegicus]	1	15	7	7	7	8	7	8	9	9	8	11	10	1	1	1	2	1	1	0	3	2	1	1	1	2	1	1	0	3	2	26.5	15.4	15.4	77.009	682	682	1	14	0	23.024	12.2	12.3	12.2
NP_001002851.1	NP_001002851.1	6	6	6	NP_001002851.1 neudesin precursor [Rattus norvegicus]	1	6	6	6	2	2	3	2	2	1	2	3	3	2	2	3	2	2	1	2	3	3	2	2	3	2	2	1	2	3	3	52	52	52	18.991	171	171	1	21	0	31.685	14	11.1	31
NP_001003673.1;XP_017447129.1	NP_001003673.1;XP_017447129.1	12;10	12;10	12;10	NP_001003673.1 mitochondrial-processing peptidase subunit alpha [Rattus norvegicus];XP_017447129.1 PREDICTED: mitochondrial-processing peptidase subunit alpha isoform X1 [Rattus norvegicus]	2	12	12	12	5	6	6	3	6	7	8	6	5	5	6	6	3	6	7	8	6	5	5	6	6	3	6	7	8	6	5	29.2	29.2	29.2	58.154	524	524;425	1	64	0	95.548	14.5	20.4	20.4
NP_001003708.1;XP_017451273.1;XP_017451272.1	NP_001003708.1	6;2;2	6;2;2	6;2;2	NP_001003708.1 trafficking protein particle complex subunit 4 [Rattus norvegicus]	3	6	6	6	3	2	0	1	0	1	3	2	2	3	2	0	1	0	1	3	2	2	3	2	0	1	0	1	3	2	2	31.5	31.5	31.5	24.359	219	219;113;113	1	14	0	6.7195	14.2	11.9	0
NP_001004021.1	NP_001004021.1	6	1	1	NP_001004021.1 keratin, type I cytoskeletal 13 [Rattus norvegicus]	1	6	1	1	5	5	6	5	4	3	5	4	4	0	1	1	1	1	0	1	0	1	0	1	1	1	1	0	1	0	1	11.4	2.1	2.1	47.729	438	438	1	8	0.0019217	1.6401	9.4	7.8	11.4
NP_001004071.1	NP_001004071.1	1	1	1	NP_001004071.1 anoctamin-7 [Rattus norvegicus]	1	1	1	1	0	0	0	0	1	0	0	0	0	0	0	0	0	1	0	0	0	0	0	0	0	0	1	0	0	0	0	1.9	1.9	1.9	97.169	860	860	1	1	0.0096563	0.91685	0	0	0
NP_001004072.2	NP_001004072.2	16	16	16	NP_001004072.2 pyruvate dehydrogenase E1 component subunit alpha, somatic form, mitochondrial precursor [Rattus norvegicus]	1	16	16	16	9	10	8	8	10	10	8	9	11	9	10	8	8	10	10	8	9	11	9	10	8	8	10	10	8	9	11	37.7	37.7	37.7	43.215	390	390	1	114	0	160.25	24.9	27.4	25.1
NP_001004078.1	NP_001004078.1	30	30	30	NP_001004078.1 T-complex protein 1 subunit epsilon [Rattus norvegicus]	1	30	30	30	20	17	20	21	20	19	18	22	23	20	17	20	21	20	19	18	22	23	20	17	20	21	20	19	18	22	23	53.8	53.8	53.8	59.536	541	541	1	279	0	323.31	43.8	39.9	43.4
NP_001004081.1	NP_001004081.1	12	12	12	NP_001004081.1 mannose-6-phosphate isomerase [Rattus norvegicus]	1	12	12	12	10	9	9	7	7	8	7	8	9	10	9	9	7	7	8	7	8	9	10	9	9	7	7	8	7	8	9	28.4	28.4	28.4	46.423	423	423	1	95	0	119.66	24.6	25.5	28.1
NP_001004082.3	NP_001004082.3	49	49	28	NP_001004082.3 heat shock protein HSP 90-beta [Rattus norvegicus]	1	49	49	28	38	41	35	37	37	38	36	40	38	38	41	35	37	37	38	36	40	38	22	22	20	19	22	21	20	22	22	55.2	55.2	34.7	83.28	724	724	1	683	0	323.31	48.6	49.2	47
NP_001004084.1;NP_001094487.1	NP_001004084.1;NP_001094487.1	3;2	3;2	2;2	NP_001004084.1 rano class II histocompatibility antigen, B-1 beta chain precursor [Rattus norvegicus];NP_001094487.1 uncharacterized protein LOC688090 precursor [Rattus norvegicus]	2	3	3	2	2	2	1	0	1	1	1	2	2	2	2	1	0	1	1	1	2	2	1	2	1	0	1	1	1	2	2	8.4	8.4	4.9	29.97	263	263;263	1	14	0	6.491	8.4	4.9	4.9
NP_001004086.1	NP_001004086.1	7	7	7	NP_001004086.1 serum paraoxonase/lactonase 3 precursor [Rattus norvegicus]	1	7	7	7	4	3	2	2	3	2	3	4	2	4	3	2	2	3	2	3	4	2	4	3	2	2	3	2	3	4	2	24.9	24.9	24.9	39.458	354	354	1	26	0	18.365	15.3	9.9	7.3
NP_001004200.1;XP_017452568.1	NP_001004200.1;XP_017452568.1	9;8	9;8	9;8	NP_001004200.1 COP9 signalosome complex subunit 3 [Rattus norvegicus];XP_017452568.1 PREDICTED: COP9 signalosome complex subunit 3 isoform X1 [Rattus norvegicus]	2	9	9	9	5	4	5	2	6	6	6	5	6	5	4	5	2	6	6	6	5	6	5	4	5	2	6	6	6	5	6	30.5	30.5	30.5	47.859	423	423;293	1	55	0	114.87	18.2	14.7	18.2
NP_001004203.3;XP_006249068.1;XP_006249067.1	NP_001004203.3;XP_006249068.1;XP_006249067.1	23;20;20	23;20;20	23;20;20	NP_001004203.3 DNA replication licensing factor MCM7 [Rattus norvegicus];XP_006249068.1 PREDICTED: DNA replication licensing factor MCM7 isoform X1 [Rattus norvegicus];XP_006249067.1 PREDICTED: DNA replication licensing factor MCM7 isoform X1 [Rattus norve	3	23	23	23	11	6	8	8	11	8	14	16	15	11	6	8	8	11	8	14	16	15	11	6	8	8	11	8	14	16	15	43.1	43.1	43.1	81.062	719	719;612;612	1	111	0	145.69	22.3	13.1	16.7
NP_001004206.1	NP_001004206.1	16	16	16	NP_001004206.1 proliferation-associated protein 2G4 [Rattus norvegicus]	1	16	16	16	12	11	10	9	9	9	10	11	9	12	11	10	9	9	9	10	11	9	12	11	10	9	9	9	10	11	9	42.4	42.4	42.4	43.656	394	394	1	113	0	244.72	37.8	35.8	28.2
NP_001004207.1	NP_001004207.1	1	1	1	NP_001004207.1 deoxyhypusine synthase [Rattus norvegicus]	1	1	1	1	1	1	0	1	0	0	0	1	0	1	1	0	1	0	0	0	1	0	1	1	0	1	0	0	0	1	0	5.4	5.4	5.4	40.705	369	369	1	5	0	7.6708	5.4	5.4	0
NP_001004208.1;XP_017454196.1	NP_001004208.1;XP_017454196.1	12;10	12;10	12;10	NP_001004208.1 calcyclin-binding protein [Rattus norvegicus];XP_017454196.1 PREDICTED: calcyclin-binding protein isoform X1 [Rattus norvegicus]	2	12	12	12	6	10	8	6	11	10	8	10	9	6	10	8	6	11	10	8	10	9	6	10	8	6	11	10	8	10	9	62	62	62	26.541	229	229;184	1	111	0	308.76	47.2	57.6	52
NP_001004215.1	NP_001004215.1	6	6	6	NP_001004215.1 peptidyl-prolyl cis-trans isomerase C precursor [Rattus norvegicus]	1	6	6	6	3	4	3	6	3	4	3	2	2	3	4	3	6	3	4	3	2	2	3	4	3	6	3	4	3	2	2	30.7	30.7	30.7	23.009	212	212	1	33	0	24.303	14.6	23.6	14.2
NP_001004218.1	NP_001004218.1	7	7	7	NP_001004218.1 plasma alpha-L-fucosidase precursor [Rattus norvegicus]	1	7	7	7	3	2	3	0	5	4	2	0	2	3	2	3	0	5	4	2	0	2	3	2	3	0	5	4	2	0	2	18.3	18.3	18.3	53.257	459	459	1	21	0	17.615	8.5	5.2	8.9
NP_001004220.1	NP_001004220.1	13	13	13	NP_001004220.1 electron transfer flavoprotein subunit beta [Rattus norvegicus]	1	13	13	13	10	10	10	11	11	11	11	11	8	10	10	10	11	11	11	11	11	8	10	10	10	11	11	11	11	11	8	43.9	43.9	43.9	27.687	255	255	1	140	0	160.65	36.5	36.5	36.5
NP_001004223.1	NP_001004223.1	16	16	16	NP_001004223.1 elongation factor 1-gamma [Rattus norvegicus]	1	16	16	16	10	9	10	11	13	13	13	14	13	10	9	10	11	13	13	13	14	13	10	9	10	11	13	13	13	14	13	33	33	33	50.06	437	437	1	169	0	89.928	22	27.2	27.2
NP_001004225.1	NP_001004225.1	8	8	8	NP_001004225.1 ES1 protein homolog, mitochondrial precursor [Rattus norvegicus]	1	8	8	8	7	5	4	6	5	5	6	5	4	7	5	4	6	5	5	6	5	4	7	5	4	6	5	5	6	5	4	39.8	39.8	39.8	28.172	266	266	1	94	0	258.01	37.2	31.2	27.4
NP_001004227.1	NP_001004227.1	10	10	10	NP_001004227.1 RNA 3-terminal phosphate cyclase [Rattus norvegicus]	1	10	10	10	9	8	5	5	7	9	7	7	6	9	8	5	5	7	9	7	7	6	9	8	5	5	7	9	7	7	6	35.5	35.5	35.5	39.313	366	366	1	81	0	239.73	32	30.6	14.8
NP_001004228.1;XP_006233428.1	NP_001004228.1;XP_006233428.1	1;1	1;1	1;1	NP_001004228.1 endomucin precursor [Rattus norvegicus];XP_006233428.1 PREDICTED: endomucin isoform X1 [Rattus norvegicus]	2	1	1	1	0	1	0	1	1	1	1	0	1	0	1	0	1	1	1	1	0	1	0	1	0	1	1	1	1	0	1	8	8	8	26.516	250	250;257	1	6	0.00019775	3.3401	0	8	0
NP_001004235.1	NP_001004235.1	7	7	7	NP_001004235.1 39S ribosomal protein L37, mitochondrial precursor [Rattus norvegicus]	1	7	7	7	3	3	2	1	4	0	2	1	1	3	3	2	1	4	0	2	1	1	3	3	2	1	4	0	2	1	1	19.4	19.4	19.4	48.365	423	423	1	17	0	34.729	7.6	9	5.4
NP_001004238.1	NP_001004238.1	7	7	7	NP_001004238.1 ras-related protein Rab-21 [Rattus norvegicus]	1	7	7	7	5	2	4	3	6	5	6	1	2	5	2	4	3	6	5	6	1	2	5	2	4	3	6	5	6	1	2	42.2	42.2	42.2	24.163	223	223	1	41	0	166.53	31.8	14.3	26.5
NP_001004239.1;XP_006241510.1;XP_017450231.1;XP_017450232.1	NP_001004239.1;XP_006241510.1;XP_017450231.1;XP_017450232.1	21;21;21;19	21;21;21;19	21;21;21;19	NP_001004239.1 dynactin subunit 2 [Rattus norvegicus];XP_006241510.1 PREDICTED: dynactin subunit 2 isoform X2 [Rattus norvegicus];XP_017450231.1 PREDICTED: dynactin subunit 2 isoform X1 [Rattus norvegicus];XP_017450232.1 PREDICTED: dynactin subunit 2 isofo	4	21	21	21	14	16	13	14	11	12	11	13	15	14	16	13	14	11	12	11	13	15	14	16	13	14	11	12	11	13	15	60.4	60.4	60.4	44.147	402	402;404;407;395	1	172	0	197.06	49.8	52	41.3
NP_001004240.1	NP_001004240.1	4	4	4	NP_001004240.1 glycosylphosphatidylinositol anchor attachment 1 protein [Rattus norvegicus]	1	4	4	4	1	1	1	2	0	1	0	0	2	1	1	1	2	0	1	0	0	2	1	1	1	2	0	1	0	0	2	6.6	6.6	6.6	67.964	621	621	1	8	0	4.5011	2.1	2.1	2.1
NP_001004241.1	NP_001004241.1	11	11	11	NP_001004241.1 sorting and assembly machinery component 50 homolog [Rattus norvegicus]	1	11	11	11	8	4	4	3	4	4	7	2	2	8	4	4	3	4	4	7	2	2	8	4	4	3	4	4	7	2	2	27.1	27.1	27.1	51.96	469	469	1	39	0	24.758	19.4	12.6	12.6
NP_001004245.1	NP_001004245.1	4	4	4	NP_001004245.1 endothelial cell-selective adhesion molecule precursor [Rattus norvegicus]	1	4	4	4	1	1	2	0	0	0	1	1	1	1	1	2	0	0	0	1	1	1	1	1	2	0	0	0	1	1	1	16.8	16.8	16.8	41.936	394	394	1	7	0	8.8823	4.3	4.8	8.1
NP_001004248.1;XP_006243497.1	NP_001004248.1;XP_006243497.1	5;5	4;4	4;4	NP_001004248.1 cell cycle control protein 50A [Rattus norvegicus];XP_006243497.1 PREDICTED: cell cycle control protein 50A isoform X1 [Rattus norvegicus]	2	5	4	4	2	2	3	0	2	1	1	2	1	2	1	2	0	1	0	1	1	0	2	1	2	0	1	0	1	1	0	19.2	16.8	16.8	37.172	328	328;364	1	8	0	6.1938	7.3	7.3	11.9
NP_001004250.1	NP_001004250.1	15	15	14	NP_001004250.1 cytochrome b-c1 complex subunit 1, mitochondrial precursor [Rattus norvegicus]	1	15	15	14	13	12	12	12	10	10	12	10	8	13	12	12	12	10	10	12	10	8	12	12	11	12	10	10	12	10	8	35	35	33.5	52.848	480	480	1	170	0	258.92	33.5	30.4	30
NP_001004251.1	NP_001004251.1	3	3	3	NP_001004251.1 m-AAA protease-interacting protein 1, mitochondrial precursor [Rattus norvegicus]	1	3	3	3	1	1	2	0	1	1	0	1	0	1	1	2	0	1	1	0	1	0	1	1	2	0	1	1	0	1	0	10.7	10.7	10.7	33.09	291	291	1	7	0	4.7912	3.4	4.8	8.2
NP_001004252.1;XP_006245251.1	NP_001004252.1;XP_006245251.1	15;13	15;13	15;13	NP_001004252.1 phenylalanine--tRNA ligase beta subunit [Rattus norvegicus];XP_006245251.1 PREDICTED: phenylalanine--tRNA ligase beta subunit isoform X1 [Rattus norvegicus]	2	15	15	15	6	9	8	8	8	7	7	12	12	6	9	8	8	8	7	7	12	12	6	9	8	8	8	7	7	12	12	29.7	29.7	29.7	65.651	589	589;583	1	92	0	135.14	14.3	16.6	15.6
NP_001004254.1	NP_001004254.1	3	3	3	NP_001004254.1 translation initiation factor IF-2, mitochondrial [Rattus norvegicus]	1	3	3	3	0	0	0	0	2	1	0	0	0	0	0	0	0	2	1	0	0	0	0	0	0	0	2	1	0	0	0	6.3	6.3	6.3	81.254	727	727	1	3	0.00019829	3.3905	0	0	0
NP_001004255.1;XP_006253818.1	NP_001004255.1;XP_006253818.1	10;5	10;5	10;5	NP_001004255.1 protein DEK [Rattus norvegicus];XP_006253818.1 PREDICTED: protein DEK isoform X1 [Rattus norvegicus]	2	10	10	10	5	4	3	5	9	6	7	7	7	5	4	3	5	9	6	7	7	7	5	4	3	5	9	6	7	7	7	30.2	30.2	30.2	42.892	378	378;306	1	62	0	87.113	21.4	13.8	10.6
NP_001004257.1	NP_001004257.1	5	5	5	NP_001004257.1 heat shock 70 kDa protein 14 [Rattus norvegicus]	1	5	5	5	1	1	1	0	3	2	3	2	3	1	1	1	0	3	2	3	2	3	1	1	1	0	3	2	3	2	3	16.3	16.3	16.3	54.462	509	509	1	18	0	17.135	1.8	1.8	1.8
NP_001004259.1;XP_006229120.1;XP_008757593.1;XP_017444627.1	NP_001004259.1;XP_006229120.1;XP_008757593.1;XP_017444627.1	11;10;9;7	11;10;9;7	11;10;9;7	NP_001004259.1 bifunctional polynucleotide phosphatase/kinase [Rattus norvegicus];XP_006229120.1 PREDICTED: bifunctional polynucleotide phosphatase/kinase isoform X1 [Rattus norvegicus];XP_008757593.1 PREDICTED: bifunctional polynucleotide phosphatase/kina	4	11	11	11	6	3	5	7	7	6	5	6	6	6	3	5	7	7	6	5	6	6	6	3	5	7	7	6	5	6	6	35.6	35.6	35.6	57.186	522	522;476;384;304	1	55	0	105.36	20.1	8.8	17.6
NP_001004262.1	NP_001004262.1	10	10	10	NP_001004262.1 conserved oligomeric Golgi complex subunit 6 [Rattus norvegicus]	1	10	10	10	5	4	3	4	3	2	5	3	4	5	4	3	4	3	2	5	3	4	5	4	3	4	3	2	5	3	4	23.3	23.3	23.3	72.956	657	657	1	36	0	48.366	11.7	8.4	7
NP_001004275.1;XP_006250729.1;XP_006250730.1	NP_001004275.1;XP_006250729.1;XP_006250730.1	18;17;14	18;17;14	18;17;14	NP_001004275.1 COP9 signalosome complex subunit 4 [Rattus norvegicus];XP_006250729.1 PREDICTED: COP9 signalosome complex subunit 4 isoform X1 [Rattus norvegicus];XP_006250730.1 PREDICTED: COP9 signalosome complex subunit 4 isoform X2 [Rattus norvegicus]	3	18	18	18	11	12	13	8	13	10	9	11	4	11	12	13	8	13	10	9	11	4	11	12	13	8	13	10	9	11	4	57.9	57.9	57.9	46.289	406	406;355;352	1	119	0	262.55	42.1	40.9	43.8
NP_001004279.1	NP_001004279.1	18	18	18	NP_001004279.1 peptidyl-prolyl cis-trans isomerase D [Rattus norvegicus]	1	18	18	18	11	12	9	8	13	11	9	14	14	11	12	9	8	13	11	9	14	14	11	12	9	8	13	11	9	14	14	56.5	56.5	56.5	40.765	370	370	1	139	0	169.46	47.3	45.4	34.1
NP_001004415.1;XP_017444710.1;XP_008758105.1;XP_017444712.1;XP_006230460.1;XP_017444711.1;NP_001004418.1	NP_001004415.1;XP_017444710.1;XP_008758105.1;XP_017444712.1;XP_006230460.1;XP_017444711.1;NP_001004418.1	5;4;3;3;3;3;3	4;4;2;2;2;2;2	4;4;2;2;2;2;2	NP_001004415.1 transforming acidic coiled-coil-containing protein 2 isoform 1 [Rattus norvegicus];XP_017444710.1 PREDICTED: transforming acidic coiled-coil-containing protein 2 isoform X1 [Rattus norvegicus];XP_008758105.1 PREDICTED: transforming acidic co	7	5	4	4	2	1	1	0	3	3	2	3	3	2	0	1	0	2	2	1	2	2	2	0	1	0	2	2	1	2	2	2.7	2.3	2.3	300.23	2834	2834;2956;991;1003;1021;1033;1129	1	12	0	5.0949	1.2	0.4	0.2
NP_001004442.1	NP_001004442.1	20	20	20	NP_001004442.1 protein disulfide-isomerase A6 precursor [Rattus norvegicus]	1	20	20	20	15	16	15	18	15	14	15	17	16	15	16	15	18	15	14	15	17	16	15	16	15	18	15	14	15	17	16	48.3	48.3	48.3	48.76	445	445	1	244	0	323.31	43.1	43.1	45.8
NP_001004443.1;XP_017451050.1	NP_001004443.1;XP_017451050.1	12;11	12;11	12;11	NP_001004443.1 beta-hexosaminidase subunit alpha precursor [Rattus norvegicus];XP_017451050.1 PREDICTED: beta-hexosaminidase subunit alpha isoform X1 [Rattus norvegicus]	2	12	12	12	5	7	8	4	6	6	5	4	4	5	7	8	4	6	6	5	4	4	5	7	8	4	6	6	5	4	4	23.1	23.1	23.1	60.537	528	528;433	1	55	0	90.053	13.1	14.6	16.3
NP_001005265.1;NP_062174.1;NP_001005330.1	NP_001005265.1;NP_062174.1;NP_001005330.1	1;1;1	1;1;1	1;1;1	NP_001005265.1 complement component receptor 1-like protein isoform 3 precursor [Rattus norvegicus];NP_062174.1 complement component receptor 1-like protein isoform 2 precursor [Rattus norvegicus];NP_001005330.1 complement component receptor 1-like protein	3	1	1	1	1	1	1	1	1	1	1	1	1	1	1	1	1	1	1	1	1	1	1	1	1	1	1	1	1	1	1	2	2	2	54.786	497	497;559;621	1	9	0.00019658	3.2442	2	2	2
NP_001005381.2;XP_008770756.1;XP_008770712.1;XP_017456851.1;NP_113818.2	NP_001005381.2;XP_008770756.1;XP_008770712.1;XP_017456851.1	12;10;8;7;1	12;10;8;7;1	2;0;1;0;0	NP_001005381.2 ATP-dependent RNA helicase DDX19A [Rattus norvegicus];XP_008770756.1 PREDICTED: ATP-dependent RNA helicase DDX19B isoform X1 [Rattus norvegicus];XP_008770712.1 PREDICTED: ATP-dependent RNA helicase DDX19A isoform X1 [Rattus norvegicus];XP_01	5	12	12	2	5	7	7	5	4	4	6	6	5	5	7	7	5	4	4	6	6	5	1	1	2	0	0	1	0	0	0	34.3	34.3	5.9	53.903	478	478;492;388;370;483	1	51	0	90.214	16.3	20.5	20.9
NP_001005528.1	NP_001005528.1	5	5	5	NP_001005528.1 40S ribosomal protein S25 [Rattus norvegicus]	1	5	5	5	5	4	4	4	4	4	4	4	4	5	4	4	4	4	4	4	4	4	5	4	4	4	4	4	4	4	4	29.6	29.6	29.6	13.742	125	125	1	48	0	14.921	29.6	24	24
NP_001005529.1	NP_001005529.1	5	5	5	NP_001005529.1 tetratricopeptide repeat protein 1 [Rattus norvegicus]	1	5	5	5	2	2	2	0	4	3	1	4	4	2	2	2	0	4	3	1	4	4	2	2	2	0	4	3	1	4	4	24.7	24.7	24.7	33.309	292	292	1	27	0	26.53	10.3	10.6	10.6
NP_001005537.1	NP_001005537.1	7	7	7	NP_001005537.1 protein Red [Rattus norvegicus]	1	7	7	7	4	2	2	3	4	4	3	3	4	4	2	2	3	4	4	3	3	4	4	2	2	3	4	4	3	3	4	14	14	14	65.587	557	557	1	34	0	14.952	8.4	4.5	3.2
NP_001005539.1	NP_001005539.1	2	2	2	NP_001005539.1 acid sphingomyelinase-like phosphodiesterase 3a precursor [Rattus norvegicus]	1	2	2	2	1	0	0	0	1	1	0	1	1	1	0	0	0	1	1	0	1	1	1	0	0	0	1	1	0	1	1	8.8	8.8	8.8	49.895	445	445	1	5	0	3.8873	3.8	0	0
NP_001005541.1	NP_001005541.1	5	5	5	NP_001005541.1 vacuolar protein sorting-associated protein 16 homolog [Rattus norvegicus]	1	5	5	5	4	1	1	1	2	1	1	2	2	4	1	1	1	2	1	1	2	2	4	1	1	1	2	1	1	2	2	9.9	9.9	9.9	94.906	839	839	1	15	0	18.226	7.7	2.3	1.8
NP_001005545.1	NP_001005545.1	9	9	9	NP_001005545.1 UPF0160 protein MYG1, mitochondrial precursor [Rattus norvegicus]	1	9	9	9	6	5	4	4	4	4	3	5	5	6	5	4	4	4	4	3	5	5	6	5	4	4	4	4	3	5	5	33.3	33.3	33.3	42.888	381	381	1	47	0	41.624	24.4	20.5	17.8
NP_001005548.1	NP_001005548.1	2	2	2	NP_001005548.1 RNA polymerase-associated protein LEO1 [Rattus norvegicus]	1	2	2	2	1	1	0	1	0	0	0	0	0	1	1	0	1	0	0	0	0	0	1	1	0	1	0	0	0	0	0	3.7	3.7	3.7	76.956	678	678	1	3	0.00055721	2.5032	1.9	1.9	0
NP_001005550.1	NP_001005550.1	28	28	28	NP_001005550.1 NADH-ubiquinone oxidoreductase 75 kDa subunit, mitochondrial precursor [Rattus norvegicus]	1	28	28	28	20	18	16	20	20	19	22	21	19	20	18	16	20	20	19	22	21	19	20	18	16	20	20	19	22	21	19	45.4	45.4	45.4	79.411	727	727	1	272	0	323.31	36.7	34.7	32.6
NP_001005554.1	NP_001005554.1	8	8	8	NP_001005554.1 transmembrane 9 superfamily member 2 precursor [Rattus norvegicus]	1	8	8	8	5	7	7	7	6	6	6	6	6	5	7	7	7	6	6	6	6	6	5	7	7	7	6	6	6	6	6	14.8	14.8	14.8	75.585	663	663	1	95	0	121.53	9	12.8	13.6
NP_001005555.1;XP_006233300.1;XP_006233299.1;XP_006233298.1	NP_001005555.1;XP_006233300.1;XP_006233299.1;XP_006233298.1	4;4;3;3	4;4;3;3	4;4;3;3	NP_001005555.1 polypyrimidine tract-binding protein 2 [Rattus norvegicus];XP_006233300.1 PREDICTED: polypyrimidine tract-binding protein 2 isoform X3 [Rattus norvegicus];XP_006233299.1 PREDICTED: polypyrimidine tract-binding protein 2 isoform X2 [Rattus no	4	4	4	4	2	2	2	0	1	1	0	2	2	2	2	2	0	1	1	0	2	2	2	2	2	0	1	1	0	2	2	18.3	18.3	18.3	57.488	531	531;532;536;537	1	13	0	14.692	9.4	9.6	9.6
NP_001005561.2;XP_006229158.1	NP_001005561.2;XP_006229158.1	7;5	7;5	7;5	NP_001005561.2 inactive serine/threonine-protein kinase VRK3 [Rattus norvegicus];XP_006229158.1 PREDICTED: inactive serine/threonine-protein kinase VRK3 isoform X1 [Rattus norvegicus]	2	7	7	7	1	1	0	2	3	2	1	4	4	1	1	0	2	3	2	1	4	4	1	1	0	2	3	2	1	4	4	21.2	21.2	21.2	51.963	462	462;444	1	19	0	11.172	3.7	1.9	0
NP_001005761.1	NP_001005761.1	4	4	4	NP_001005761.1 myotubularin-related protein 9 [Rattus norvegicus]	1	4	4	4	3	0	0	2	1	1	2	2	1	3	0	0	2	1	1	2	2	1	3	0	0	2	1	1	2	2	1	6	6	6	63.404	549	549	1	12	0	4.4168	4.7	0	0
NP_001005765.1	NP_001005765.1	9	9	2	NP_001005765.1 ras-related protein Rap-1A precursor [Rattus norvegicus]	1	9	9	2	8	6	7	5	9	5	6	4	7	8	6	7	5	9	5	6	4	7	1	1	2	1	2	1	1	1	2	40.2	40.2	8.2	20.987	184	184	1	81	0	100.72	40.2	33.2	34.8
NP_001005875.1;XP_006247615.1	NP_001005875.1	17;2	17;2	17;2	NP_001005875.1 26S proteasome non-ATPase regulatory subunit 12 [Rattus norvegicus]	2	17	17	17	10	8	10	14	11	10	12	12	9	10	8	10	14	11	10	12	12	9	10	8	10	14	11	10	12	12	9	43	43	43	52.936	456	456;122	1	132	0	155.83	27.6	25.2	29.6
NP_001005876.1	NP_001005876.1	3	3	3	NP_001005876.1 jupiter microtubule associated homolog 1 [Rattus norvegicus]	1	3	3	3	2	2	1	1	1	1	1	2	3	2	2	1	1	1	1	1	2	3	2	2	1	1	1	1	1	2	3	28.9	28.9	28.9	15.575	149	149	1	15	0	70.157	28.2	16.8	16.8
NP_001005878.1	NP_001005878.1	2	2	2	NP_001005878.1 kinesin-like protein KIFC1 [Rattus norvegicus]	1	2	2	2	0	1	0	0	0	0	0	1	1	0	1	0	0	0	0	0	1	1	0	1	0	0	0	0	0	1	1	5.3	5.3	5.3	76.14	693	693	1	4	0.00070935	1.8455	0	1.9	0
NP_001005879.1;XP_006236885.1	NP_001005879.1;XP_006236885.1	34;34	34;34	26;26	NP_001005879.1 glutamine--fructose-6-phosphate aminotransferase [isomerizing] 1 [Rattus norvegicus];XP_006236885.1 PREDICTED: glutamine--fructose-6-phosphate aminotransferase [isomerizing] 1 isoform X1 [Rattus norvegicus]	2	34	34	26	25	23	21	27	30	28	27	29	26	25	23	21	27	30	28	27	29	26	19	16	15	21	22	20	19	21	18	49.5	49.5	38.3	76.826	681	681;699	1	422	0	323.31	41.1	37.2	36.1
NP_001005883.1	NP_001005883.1	1	1	1	NP_001005883.1 phosphatidylinositol 4-kinase type 2-beta [Rattus norvegicus]	1	1	1	1	0	0	0	0	0	0	0	1	1	0	0	0	0	0	0	0	1	1	0	0	0	0	0	0	0	1	1	2.7	2.7	2.7	54.464	477	477	1	2	0.00054895	2.2787	0	0	0
NP_001005884.1	NP_001005884.1	23	23	23	NP_001005884.1 mitochondrial proton/calcium exchanger protein precursor [Rattus norvegicus]	1	23	23	23	11	14	11	14	16	15	11	13	17	11	14	11	14	16	15	11	13	17	11	14	11	14	16	15	11	13	17	42.8	42.8	42.8	83.059	739	739	1	166	0	323.31	23.3	30.4	27.6
NP_001005887.1;XP_008760558.1;XP_008760557.1	NP_001005887.1;XP_008760558.1;XP_008760557.1	8;8;8	7;7;7	7;7;7	NP_001005887.1 E3 ubiquitin-protein ligase Itchy homolog [Rattus norvegicus];XP_008760558.1 PREDICTED: E3 ubiquitin-protein ligase Itchy homolog isoform X1 [Rattus norvegicus];XP_008760557.1 PREDICTED: E3 ubiquitin-protein ligase Itchy homolog isoform X1 [	3	8	7	7	1	2	0	1	3	2	3	3	1	1	2	0	1	2	2	2	2	1	1	2	0	1	2	2	2	2	1	13.7	12.8	12.8	97.745	854	854;864;864	1	14	0	10.998	1.5	4.1	0
NP_001005889.2	NP_001005889.2	24	9	9	NP_001005889.2 radixin [Rattus norvegicus]	1	24	9	9	16	10	11	14	15	12	15	13	17	5	4	6	3	5	3	4	2	6	5	4	6	3	5	3	4	2	6	37.4	18	18	68.543	583	583	1	43	0	62.483	26.9	21.6	22.6
NP_001005895.2	NP_001005895.2	11	1	1	NP_001005895.2 ATP-dependent RNA helicase DDX19B [Rattus norvegicus]	1	11	1	1	5	6	5	5	4	3	6	6	5	1	0	0	0	0	0	0	0	0	1	0	0	0	0	0	0	0	0	33.6	5.2	5.2	53.87	479	479	1	1	0	4.956	19.2	18.2	15
NP_001005903.1;XP_006239237.1;XP_006239234.1;XP_006239239.1;XP_006239236.1;XP_006239233.1	NP_001005903.1;XP_006239237.1;XP_006239234.1;XP_006239239.1;XP_006239236.1;XP_006239233.1	17;17;17;11;11;11	17;17;17;11;11;11	17;17;17;11;11;11	NP_001005903.1 F-actin-capping protein subunit beta [Rattus norvegicus];XP_006239237.1 PREDICTED: F-actin-capping protein subunit beta isoform X4 [Rattus norvegicus];XP_006239234.1 PREDICTED: F-actin-capping protein subunit beta isoform X2 [Rattus norvegic	6	17	17	17	12	13	11	12	11	11	11	13	12	12	13	11	12	11	11	11	13	12	12	13	11	12	11	11	11	13	12	43.8	43.8	43.8	30.628	272	272;302;326;277;307;331	1	145	0	276.57	38.2	40.4	34.9
NP_001006602.1	NP_001006602.1	15	15	15	NP_001006602.1 GPI transamidase component PIG-S [Rattus norvegicus]	1	15	15	15	9	7	7	7	5	7	6	5	6	9	7	7	7	5	7	6	5	6	9	7	7	7	5	7	6	5	6	47.7	47.7	47.7	61.724	555	555	1	81	0	148.58	28.5	25.9	24.1
NP_001006961.1	NP_001006961.1	1	1	1	NP_001006961.1 mitochondrial fission process protein 1 [Rattus norvegicus]	1	1	1	1	0	1	1	1	1	1	1	1	1	0	1	1	1	1	1	1	1	1	0	1	1	1	1	1	1	1	1	6.6	6.6	6.6	18.366	166	166	1	8	0	11.006	0	6.6	6.6
NP_001006967.1	NP_001006967.1	6	6	5	NP_001006967.1 enoyl-CoA delta isomerase 2, mitochondrial [Rattus norvegicus]	1	6	6	5	5	3	4	5	3	4	5	5	4	5	3	4	5	3	4	5	5	4	4	2	3	4	2	3	4	4	3	17.9	17.9	15.6	43.021	391	391	1	43	0	60.325	17.4	9	14.3
NP_001006971.1	NP_001006971.1	20	20	20	NP_001006971.1 cytochrome b-c1 complex subunit 2, mitochondrial precursor [Rattus norvegicus]	1	20	20	20	16	13	12	14	15	14	14	13	15	16	13	12	14	15	14	14	13	15	16	13	12	14	15	14	14	13	15	52.4	52.4	52.4	48.396	452	452	1	203	0	301.77	50	37.4	36.7
NP_001006973.1	NP_001006973.1	13	13	13	NP_001006973.1 NADH dehydrogenase [ubiquinone] flavoprotein 1, mitochondrial [Rattus norvegicus]	1	13	13	13	6	8	7	8	9	9	9	8	8	6	8	7	8	9	9	9	8	8	6	8	7	8	9	9	9	8	8	33.2	33.2	33.2	50.73	464	464	1	98	0	154.39	17	21.8	20.3
NP_001006979.1	NP_001006979.1	8	8	8	NP_001006979.1 protein SEC13 homolog [Rattus norvegicus]	1	8	8	8	6	6	3	2	5	5	3	5	5	6	6	3	2	5	5	3	5	5	6	6	3	2	5	5	3	5	5	24.2	24.2	24.2	35.547	322	322	1	56	0	185.96	24.2	24.2	16.1
NP_001006982.2;XP_006240368.1;XP_008762978.1	NP_001006982.2;XP_006240368.1;XP_008762978.1	10;10;7	10;10;7	10;10;7	NP_001006982.2 dihydrolipoyllysine-residue succinyltransferase component of 2-oxoglutarate dehydrogenase complex, mitochondrial [Rattus norvegicus];XP_006240368.1 PREDICTED: dihydrolipoyllysine-residue succinyltransferase component of 2-oxoglutarate dehydr	3	10	10	10	5	7	8	8	8	9	6	6	4	5	7	8	8	8	9	6	6	4	5	7	8	8	8	9	6	6	4	24.9	24.9	24.9	48.899	454	454;479;270	1	79	0	251.17	14.3	19.6	22.5
NP_001006986.1;XP_006241713.1	NP_001006986.1;XP_006241713.1	6;5	6;5	6;5	NP_001006986.1 39S ribosomal protein L13, mitochondrial [Rattus norvegicus];XP_006241713.1 PREDICTED: 39S ribosomal protein L13, mitochondrial isoform X1 [Rattus norvegicus]	2	6	6	6	1	3	3	2	1	2	2	1	1	1	3	3	2	1	2	2	1	1	1	3	3	2	1	2	2	1	1	38.8	38.8	38.8	20.54	178	178;162	1	17	0	16.457	8.4	22.5	22.5
NP_001006994.1	NP_001006994.1	3	3	3	NP_001006994.1 gamma-sarcoglycan [Rattus norvegicus]	1	3	3	3	0	1	1	0	0	1	1	1	0	0	1	1	0	0	1	1	1	0	0	1	1	0	0	1	1	1	0	14.4	14.4	14.4	32.18	292	292	1	6	0	19.206	0	4.8	6.5
NP_001006996.1;XP_003753224.2;XP_003748745.2;XP_006227976.1;XP_017443394.1	NP_001006996.1;XP_003753224.2;XP_003748745.2	8;5;5;3;1	8;5;5;3;1	8;5;5;3;1	NP_001006996.1 acetyl-CoA acetyltransferase, cytosolic [Rattus norvegicus];XP_003753224.2 PREDICTED: acetyl-CoA acetyltransferase, cytosolic-like [Rattus norvegicus];XP_003748745.2 PREDICTED: acetyl-CoA acetyltransferase, cytosolic-like [Rattus norvegicus]	5	8	8	8	6	5	5	6	6	7	5	7	7	6	5	5	6	6	7	5	7	7	6	5	5	6	6	7	5	7	7	28.2	28.2	28.2	41.108	397	397;402;402;87;111	1	95	0	320.98	26.2	24.2	24.2
NP_001006997.1	NP_001006997.1	9	9	9	NP_001006997.1 ATP-dependent RNA helicase DDX18 [Rattus norvegicus]	1	9	9	9	2	1	2	2	0	2	1	3	2	2	1	2	2	0	2	1	3	2	2	1	2	2	0	2	1	3	2	19.4	19.4	19.4	75.547	674	674	1	15	0	6.9069	4.5	1.6	3.6
NP_001006998.1	NP_001006998.1	1	1	1	NP_001006998.1 sphingomyelin phosphodiesterase [Rattus norvegicus]	1	1	1	1	1	1	0	0	0	1	0	1	1	1	1	0	0	0	1	0	1	1	1	1	0	0	0	1	0	1	1	2.4	2.4	2.4	69.76	627	627	1	5	0.0051987	1.2105	2.4	2.4	0
NP_001007003.1;XP_006239637.1;XP_006239636.1	NP_001007003.1;XP_006239637.1;XP_006239636.1	1;1;1	1;1;1	1;1;1	NP_001007003.1 matrix remodeling-associated protein 8 precursor [Rattus norvegicus];XP_006239637.1 PREDICTED: matrix-remodeling-associated protein 8 isoform X2 [Rattus norvegicus];XP_006239636.1 PREDICTED: matrix-remodeling-associated protein 8 isoform X1	3	1	1	1	0	1	1	0	0	0	0	0	0	0	1	1	0	0	0	0	0	0	0	1	1	0	0	0	0	0	0	2.6	2.6	2.6	42.735	382	382;439;442	1	2	0.0032429	1.3899	0	2.6	2.6
NP_001007004.1	NP_001007004.1	4	4	4	NP_001007004.1 CCR4-NOT transcription complex subunit 10 [Rattus norvegicus]	1	4	4	4	1	1	1	3	2	1	1	1	2	1	1	1	3	2	1	1	1	2	1	1	1	3	2	1	1	1	2	5.5	5.5	5.5	81.818	744	744	1	13	0	13.493	1.6	1.6	1.6
NP_001007092.1	NP_001007092.1	2	2	2	NP_001007092.1 renin receptor precursor [Rattus norvegicus]	1	2	2	2	0	0	0	1	1	1	0	1	2	0	0	0	1	1	1	0	1	2	0	0	0	1	1	1	0	1	2	7.7	7.7	7.7	39.081	350	350	1	6	0.00054645	2.2211	0	0	0
NP_001007266.1	NP_001007266.1	6	1	1	NP_001007266.1 protein OS-9 precursor [Rattus norvegicus]	1	6	1	1	0	2	1	0	2	2	3	3	3	0	1	0	0	0	0	0	0	0	0	1	0	0	0	0	0	0	0	14.7	3	3	75.364	666	666	1	1	0.0042287	1.2905	0	5.6	2.6
NP_001007555.1;XP_008762498.1;XP_008762497.1;XP_008762496.1;XP_008762495.1	NP_001007555.1;XP_008762498.1;XP_008762497.1;XP_008762496.1;XP_008762495.1	4;4;4;4;4	4;4;4;4;4	4;4;4;4;4	NP_001007555.1 heterogeneous nuclear ribonucleoprotein L [Rattus norvegicus];XP_008762498.1 PREDICTED: heterogeneous nuclear ribonucleoprotein L isoform X3 [Rattus norvegicus];XP_008762497.1 PREDICTED: heterogeneous nuclear ribonucleoprotein L isoform X3 [	5	4	4	4	2	1	2	2	3	2	2	4	3	2	1	2	2	3	2	2	4	3	2	1	2	2	3	2	2	4	3	17.9	17.9	17.9	38.227	346	346;376;376;387;552	1	27	0	27.71	12.7	3.8	12.7
NP_001007600.1;XP_008765372.1;XP_008756250.1	NP_001007600.1;XP_008765372.1;XP_008756250.1	3;2;2	3;2;2	3;2;2	NP_001007600.1 60S ribosomal protein L23 [Rattus norvegicus];XP_008765372.1 PREDICTED: LOW QUALITY PROTEIN: 60S ribosomal protein L23-like [Rattus norvegicus];XP_008756250.1 PREDICTED: LOW QUALITY PROTEIN: 60S ribosomal protein L23-like [Rattus norvegicus]	3	3	3	3	2	3	3	3	3	3	3	3	3	2	3	3	3	3	3	3	3	3	2	3	3	3	3	3	3	3	3	18.6	18.6	18.6	14.865	140	140;140;140	1	47	0	24.214	12.9	18.6	18.6
NP_001007601.1;NP_001103082.1	NP_001007601.1;NP_001103082.1	16;10	16;10	16;10	NP_001007601.1 40S ribosomal protein S4, X isoform [Rattus norvegicus];NP_001103082.1 ribosomal protein S4, Y-linked 2 [Rattus norvegicus]	2	16	16	16	12	5	5	9	10	9	8	10	9	12	5	5	9	10	9	8	10	9	12	5	5	9	10	9	8	10	9	49.4	49.4	49.4	29.597	263	263;262	1	133	0	98.497	44.5	21.3	22.4
NP_001007603.1;XP_017444784.1;XP_008758721.1;XP_006231654.1;XP_006231653.1;XP_006231652.1;NP_001012071.1	NP_001007603.1	9;1;1;1;1;1;1	9;1;1;1;1;1;1	9;1;1;1;1;1;1	NP_001007603.1 glutathione S-transferase omega-1 [Rattus norvegicus]	7	9	9	9	6	6	7	7	7	6	7	7	9	6	6	7	7	7	6	7	7	9	6	6	7	7	7	6	7	7	9	37.8	37.8	37.8	27.683	241	241;248;248;248;248;248;248	1	90	0	96.357	27.8	29.9	34
NP_001007607.1;XP_006233198.1	NP_001007607.1;XP_006233198.1	18;18	18;18	18;18	NP_001007607.1 serine--tRNA ligase, cytoplasmic [Rattus norvegicus];XP_006233198.1 PREDICTED: serine--tRNA ligase, cytoplasmic isoform X1 [Rattus norvegicus]	2	18	18	18	12	10	11	7	8	8	9	10	8	12	10	11	7	8	8	9	10	8	12	10	11	7	8	8	9	10	8	37.3	37.3	37.3	58.587	512	512;536	1	111	0	179.35	29.3	25.6	27.9
NP_001007609.1;XP_017456643.1	NP_001007609.1	7;1	7;1	7;1	NP_001007609.1 S-phase kinase-associated protein 1 [Rattus norvegicus]	2	7	7	7	7	6	6	4	6	6	5	6	6	7	6	6	4	6	6	5	6	6	7	6	6	4	6	6	5	6	6	48.5	48.5	48.5	18.672	163	163;810	1	87	0	80.398	48.5	44.2	44.2
NP_001007612.1	NP_001007612.1	2	2	2	NP_001007612.1 refilin-B [Rattus norvegicus]	1	2	2	2	0	0	0	0	1	0	0	1	0	0	0	0	0	1	0	0	1	0	0	0	0	0	1	0	0	1	0	10.6	10.6	10.6	23.453	216	216	1	2	0.0056923	1.1882	0	0	0
NP_001007620.1	NP_001007620.1	3	3	3	NP_001007620.1 transmembrane emp24 domain-containing protein 5 precursor [Rattus norvegicus]	1	3	3	3	1	1	1	1	2	1	1	1	2	1	1	1	1	2	1	1	1	2	1	1	1	1	2	1	1	1	2	14	14	14	26.136	229	229	1	11	0	13.292	5.2	5.2	4.8
NP_001007625.1;XP_008764699.1;XP_003752277.1	NP_001007625.1;XP_008764699.1	28;28;10	28;28;10	28;28;10	NP_001007625.1 glutamine--tRNA ligase [Rattus norvegicus];XP_008764699.1 PREDICTED: glutamine--tRNA ligase isoform X1 [Rattus norvegicus]	3	28	28	28	11	12	14	15	13	11	14	14	15	11	12	14	15	13	11	14	14	15	11	12	14	15	13	11	14	14	15	44.9	44.9	44.9	87.699	775	775;780;775	1	153	0	323.31	21.3	21	26.1
NP_001007626.1	NP_001007626.1	2	2	2	NP_001007626.1 mammalian ependymin-related protein 1 precursor [Rattus norvegicus]	1	2	2	2	1	1	2	0	0	0	0	0	0	1	1	2	0	0	0	0	0	0	1	1	2	0	0	0	0	0	0	9.4	9.4	9.4	25.639	224	224	1	4	0.0069756	1.0829	4	4	9.4
NP_001007635.1	NP_001007635.1	8	8	8	NP_001007635.1 protein pelota homolog [Rattus norvegicus]	1	8	8	8	4	2	3	2	1	2	0	1	1	4	2	3	2	1	2	0	1	1	4	2	3	2	1	2	0	1	1	29.1	29.1	29.1	43.407	385	385	1	17	0	84.569	21	5.2	9.9
NP_001007637.1	NP_001007637.1	3	3	3	NP_001007637.1 protein S100-A1 [Rattus norvegicus]	1	3	3	3	3	3	3	3	2	1	2	2	1	3	3	3	3	2	1	2	2	1	3	3	3	3	2	1	2	2	1	41.5	41.5	41.5	10.56	94	94	1	27	0	101.71	41.5	41.5	41.5
NP_001007644.1	NP_001007644.1	6	6	6	NP_001007644.1 thioredoxin-related transmembrane protein 2 precursor [Rattus norvegicus]	1	6	6	6	5	2	3	4	4	4	4	4	4	5	2	3	4	4	4	4	4	4	5	2	3	4	4	4	4	4	4	25.8	25.8	25.8	33.865	295	295	1	42	0	39.748	25.1	13.9	13.9
NP_001007646.1;XP_008761102.1	NP_001007646.1;XP_008761102.1	2;2	2;2	2;2	NP_001007646.1 maturin [Rattus norvegicus];XP_008761102.1 PREDICTED: maturin isoform X1 [Rattus norvegicus]	2	2	2	2	1	0	1	0	0	0	0	0	0	1	0	1	0	0	0	0	0	0	1	0	1	0	0	0	0	0	0	15.3	15.3	15.3	14.832	131	131;148	1	2	0.00054575	2.207	9.2	0	6.1
NP_001007647.1	NP_001007647.1	6	6	6	NP_001007647.1 peptidyl-prolyl cis-trans isomerase FKBP9 precursor [Rattus norvegicus]	1	6	6	6	5	4	3	3	3	4	1	1	2	5	4	3	3	3	4	1	1	2	5	4	3	3	3	4	1	1	2	14.9	14.9	14.9	63.126	570	570	1	26	0	19.471	13.3	9.8	5.8
NP_001007648.1	NP_001007648.1	3	3	3	NP_001007648.1 E3 ubiquitin-protein ligase RNF181 [Rattus norvegicus]	1	3	3	3	1	2	2	1	2	1	1	2	1	1	2	2	1	2	1	1	2	1	1	2	2	1	2	1	1	2	1	23	23	23	19.288	165	165	1	16	0.0014075	1.7318	12.7	17.6	17.6
NP_001007652.1	NP_001007652.1	4	4	4	NP_001007652.1 peflin [Rattus norvegicus]	1	4	4	4	3	3	3	3	1	3	1	2	2	3	3	3	3	1	3	1	2	2	3	3	3	3	1	3	1	2	2	23	23	23	30.012	283	283	1	29	0	207.63	20.1	20.1	19.1
NP_001007654.1	NP_001007654.1	6	6	6	NP_001007654.1 28S ribosomal protein S15, mitochondrial [Rattus norvegicus]	1	6	6	6	3	0	0	2	3	3	2	4	2	3	0	0	2	3	3	2	4	2	3	0	0	2	3	3	2	4	2	24.1	24.1	24.1	29.712	257	257	1	21	0	7.2175	14	0	0
NP_001007658.1	NP_001007658.1	3	3	3	NP_001007658.1 UPF0449 protein C19orf25 homolog [Rattus norvegicus]	1	3	3	3	2	2	3	1	1	2	1	3	2	2	2	3	1	1	2	1	3	2	2	2	3	1	1	2	1	3	2	54.1	54.1	54.1	12.142	109	109	1	17	0	66.006	33	33	54.1
NP_001007659.1	NP_001007659.1	4	4	4	NP_001007659.1 protein THEM6 precursor [Rattus norvegicus]	1	4	4	4	2	1	1	2	0	0	1	1	0	2	1	1	2	0	0	1	1	0	2	1	1	2	0	0	1	1	0	30	30	30	23.747	207	207	1	8	0	6.8885	12.6	4.8	7.7
NP_001007663.1	NP_001007663.1	23	23	23	NP_001007663.1 coatomer subunit delta [Rattus norvegicus]	1	23	23	23	11	11	10	12	13	14	10	15	13	11	11	10	12	13	14	10	15	13	11	11	10	12	13	14	10	15	13	44.6	44.6	44.6	57.199	511	511	1	164	0	145.74	29.9	21.7	21.1
NP_001007683.1;XP_006252032.1	NP_001007683.1;XP_006252032.1	4;2	4;2	4;2	NP_001007683.1 thiamine-triphosphatase [Rattus norvegicus];XP_006252032.1 PREDICTED: thiamine-triphosphatase isoform X1 [Rattus norvegicus]	2	4	4	4	1	2	2	1	0	2	2	0	0	1	2	2	1	0	2	2	0	0	1	2	2	1	0	2	2	0	0	18.3	18.3	18.3	24.543	224	224;205	1	10	0	4.2214	3.1	7.1	9.8
NP_001007689.1	NP_001007689.1	2	2	2	NP_001007689.1 protein FAM210A [Rattus norvegicus]	1	2	2	2	0	0	0	0	1	0	0	1	0	0	0	0	0	1	0	0	1	0	0	0	0	0	1	0	0	1	0	9.2	9.2	9.2	31.474	273	273	1	2	0.0064989	1.1176	0	0	0
NP_001007697.1	NP_001007697.1	5	5	5	NP_001007697.1 39S ribosomal protein L9, mitochondrial [Rattus norvegicus]	1	5	5	5	3	2	3	1	2	1	2	3	3	3	2	3	1	2	1	2	3	3	3	2	3	1	2	1	2	3	3	20.6	20.6	20.6	30.076	262	262	1	21	0	10.11	13.7	10.3	13
NP_001007699.1	NP_001007699.1	13	13	12	NP_001007699.1 Golgi phosphoprotein 3-like [Rattus norvegicus]	1	13	13	12	9	5	3	6	8	6	9	8	6	9	5	3	6	8	6	9	8	6	8	4	2	5	7	5	8	7	5	45.3	45.3	45.3	32.921	285	285	1	72	0	63.281	30.5	21.8	15.1
NP_001007702.1	NP_001007702.1	2	2	2	NP_001007702.1 translocating chain-associated membrane protein 1 [Rattus norvegicus]	1	2	2	2	0	0	0	0	1	0	2	1	0	0	0	0	0	1	0	2	1	0	0	0	0	0	1	0	2	1	0	8.3	8.3	8.3	43.03	374	374	1	5	0.00019798	3.3608	0	0	0
NP_001007705.1	NP_001007705.1	6	6	6	NP_001007705.1 aldose 1-epimerase [Rattus norvegicus]	1	6	6	6	2	4	2	2	3	4	2	3	3	2	4	2	2	3	4	2	3	3	2	4	2	2	3	4	2	3	3	27.5	27.5	27.5	37.892	342	342	1	27	0	20.185	9.1	15.8	8.8
NP_001007706.1;XP_006240538.1;XP_006240537.1	NP_001007706.1;XP_006240538.1;XP_006240537.1	1;1;1	1;1;1	1;1;1	NP_001007706.1 putative E3 ubiquitin-protein ligase UBR7 [Rattus norvegicus];XP_006240538.1 PREDICTED: putative E3 ubiquitin-protein ligase UBR7 isoform X2 [Rattus norvegicus];XP_006240537.1 PREDICTED: putative E3 ubiquitin-protein ligase UBR7 isoform X1 [	3	1	1	1	1	0	0	0	0	0	0	1	0	1	0	0	0	0	0	0	1	0	1	0	0	0	0	0	0	1	0	2.6	2.6	2.6	48.207	425	425;444;445	1	2	0.0014018	1.6886	2.6	0	0
NP_001007713.1	NP_001007713.1	14	14	14	NP_001007713.1 caveolae-associated protein 2 [Rattus norvegicus]	1	14	14	14	11	5	5	6	6	5	6	3	6	11	5	5	6	6	5	6	3	6	11	5	5	6	6	5	6	3	6	45.1	45.1	45.1	46.386	417	417	1	73	0	118.45	34.1	29	29
NP_001007721.1;XP_008760175.1	NP_001007721.1;XP_008760175.1	8;5	8;5	8;5	NP_001007721.1 Golgi reassembly-stacking protein 2 [Rattus norvegicus];XP_008760175.1 PREDICTED: Golgi reassembly-stacking protein 2-like [Rattus norvegicus]	2	8	8	8	4	4	3	2	3	4	3	4	3	4	4	3	2	3	4	3	4	3	4	4	3	2	3	4	3	4	3	22	22	22	47.309	454	454;386	1	38	0	47.797	14.8	14.1	10.4
NP_001007723.1;NP_001166316.1	NP_001007723.1	12;1	2;0	1;0	NP_001007723.1 hemoglobin, alpha 2 [Rattus norvegicus]	2	12	2	1	10	10	9	9	12	9	8	8	8	1	2	1	1	2	1	1	1	0	1	1	1	0	1	1	0	0	0	71.8	7.7	7.7	15.284	142	142;142	1	10	1	-2	71.8	71.1	71.1
NP_001007733.1;XP_006253934.1	NP_001007733.1;XP_006253934.1	7;7	7;7	7;7	NP_001007733.1 serpin B9 [Rattus norvegicus];XP_006253934.1 PREDICTED: serpin B9 isoform X1 [Rattus norvegicus]	2	7	7	7	3	2	3	4	5	2	4	2	4	3	2	3	4	5	2	4	2	4	3	2	3	4	5	2	4	2	4	24.1	24.1	24.1	42.301	374	374;396	1	34	0	33.716	11.5	7.5	11.5
NP_001007741.1;XP_006256522.1;XP_017457181.1	NP_001007741.1;XP_006256522.1;XP_017457181.1	13;13;9	13;13;9	12;12;8	NP_001007741.1 vacuolar protein sorting-associated protein 26A [Rattus norvegicus];XP_006256522.1 PREDICTED: vacuolar protein sorting-associated protein 26A isoform X1 [Rattus norvegicus];XP_017457181.1 PREDICTED: vacuolar protein sorting-associated protei	3	13	13	12	6	6	9	6	7	6	5	5	4	6	6	9	6	7	6	5	5	4	6	6	9	6	7	6	5	5	3	48.3	48.3	48.3	38.114	327	327;359;216	1	63	0	138.23	26.9	26.6	35.2
NP_001007743.1;XP_006233751.1	NP_001007743.1;XP_006233751.1	3;2	3;2	3;2	NP_001007743.1 ubiquitin-associated domain-containing protein 1 [Rattus norvegicus];XP_006233751.1 PREDICTED: ubiquitin-associated domain-containing protein 1 isoform X1 [Rattus norvegicus]	2	3	3	3	1	1	1	0	0	0	1	0	1	1	1	1	0	0	0	1	0	1	1	1	1	0	0	0	1	0	1	16.4	16.4	16.4	45.546	409	409;340	1	5	0	15.526	8.6	8.6	8.6
NP_001007744.1	NP_001007744.1	4	3	3	NP_001007744.1 cyclin-dependent kinase 9 [Rattus norvegicus]	1	4	3	3	2	1	1	0	2	2	1	1	2	1	0	0	0	2	1	1	0	1	1	0	0	0	2	1	1	0	1	16.1	14	14	42.761	372	372	1	6	0	12.383	8.1	2.2	2.2
NP_001007746.1	NP_001007746.1	14	14	14	NP_001007746.1 transmembrane protein 43 [Rattus norvegicus]	1	14	14	14	11	9	9	8	6	7	8	10	10	11	9	9	8	6	7	8	10	10	11	9	9	8	6	7	8	10	10	55.5	55.5	55.5	44.774	400	400	1	107	0	256.71	46.2	40	40
NP_001007751.1;XP_006241293.1;XP_006241292.1;XP_006241291.1;XP_006241290.1	NP_001007751.1;XP_006241293.1;XP_006241292.1;XP_006241291.1;XP_006241290.1	1;1;1;1;1	1;1;1;1;1	1;1;1;1;1	NP_001007751.1 cholinephosphotransferase 1 [Rattus norvegicus];XP_006241293.1 PREDICTED: cholinephosphotransferase 1 isoform X4 [Rattus norvegicus];XP_006241292.1 PREDICTED: cholinephosphotransferase 1 isoform X3 [Rattus norvegicus];XP_006241291.1 PREDICTE	5	1	1	1	1	0	0	1	0	1	1	0	0	1	0	0	1	0	1	1	0	0	1	0	0	1	0	1	1	0	0	3	3	3	44.6	398	398;406;468;472;509	1	5	0.000712	1.9048	3	0	0
NP_001007753.1	NP_001007753.1	1	1	1	NP_001007753.1 meiosis-specific nuclear structural protein 1 [Rattus norvegicus]	1	1	1	1	0	1	0	0	0	0	0	0	0	0	1	0	0	0	0	0	0	0	0	1	0	0	0	0	0	0	0	1.6	1.6	1.6	61.239	498	498	1	1	0.0081072	1.0322	0	1.6	0
NP_001007756.1;XP_008765499.1;XP_006245493.1	NP_001007756.1;XP_008765499.1;XP_006245493.1	8;7;7	8;7;7	8;7;7	NP_001007756.1 selenocysteine lyase [Rattus norvegicus];XP_008765499.1 PREDICTED: selenocysteine lyase isoform X2 [Rattus norvegicus];XP_006245493.1 PREDICTED: selenocysteine lyase isoform X1 [Rattus norvegicus]	3	8	8	8	4	2	4	2	2	2	2	2	2	4	2	4	2	2	2	2	2	2	4	2	4	2	2	2	2	2	2	34	34	34	47.255	432	432;458;485	1	23	0	28.458	17.6	6.7	15
NP_001007799.1	NP_001007799.1	1	1	1	NP_001007799.1 tyrosine-protein kinase BTK [Rattus norvegicus]	1	1	1	1	1	0	0	0	0	0	0	0	1	1	0	0	0	0	0	0	0	1	1	0	0	0	0	0	0	0	1	2.1	2.1	2.1	76.403	660	660	1	2	0.0032434	1.3914	2.1	0	0
NP_001007801.1	NP_001007801.1	11	11	11	NP_001007801.1 putative oxidoreductase GLYR1 [Rattus norvegicus]	1	11	11	11	7	7	7	5	4	8	7	6	7	7	7	7	5	4	8	7	6	7	7	7	7	5	4	8	7	6	7	30.1	30.1	30.1	60.421	552	552	1	74	0	98.451	22.8	19	19
NP_001007805.1;XP_006247247.1	NP_001007805.1;XP_006247247.1	5;4	5;4	5;4	NP_001007805.1 vacuolar-sorting protein SNF8 [Rattus norvegicus];XP_006247247.1 PREDICTED: vacuolar-sorting protein SNF8 isoform X1 [Rattus norvegicus]	2	5	5	5	1	3	3	2	2	2	3	2	2	1	3	3	2	2	2	3	2	2	1	3	3	2	2	2	3	2	2	23.6	23.6	23.6	28.884	258	258;223	1	20	0	20.592	4.7	12.8	13.6
NP_001008218.1;NP_001102354.1	NP_001008218.1	12;5	12;5	12;5	NP_001008218.1 proteasome subunit alpha type-7 [Rattus norvegicus]	2	12	12	12	11	10	10	11	10	9	11	9	9	11	10	10	11	10	9	11	9	9	11	10	10	11	10	9	11	9	9	55.6	55.6	55.6	27.855	248	248;250	1	132	0	199.99	50	42.3	42.3
NP_001008278.1	NP_001008278.1	3	3	3	NP_001008278.1 transducin beta-like protein 3 [Rattus norvegicus]	1	3	3	3	1	0	0	0	2	0	1	0	2	1	0	0	0	2	0	1	0	2	1	0	0	0	2	0	1	0	2	6.4	6.4	6.4	88.371	800	800	1	6	0.00019305	2.957	1.6	0	0
NP_001008279.1	NP_001008279.1	2	2	2	NP_001008279.1 CDKN2AIP N-terminal-like protein [Rattus norvegicus]	1	2	2	2	0	0	0	0	1	1	0	2	0	0	0	0	0	1	1	0	2	0	0	0	0	0	1	1	0	2	0	25	25	25	13.197	116	116	1	4	0.00019857	3.42	0	0	0
NP_001008280.1	NP_001008280.1	26	1	1	NP_001008280.1 protein flightless-1 homolog [Rattus norvegicus]	1	26	1	1	12	10	11	10	9	10	10	9	10	0	0	1	0	0	0	0	1	1	0	0	1	0	0	0	0	1	1	30.9	2	2	144.86	1270	1270	1	3	0.00019459	3.0898	14.1	10.8	15.3
NP_001008281.1	NP_001008281.1	9	9	9	NP_001008281.1 leucine-rich repeat-containing protein 59 [Rattus norvegicus]	1	9	9	9	7	8	8	7	8	9	9	8	8	7	8	8	7	8	9	9	8	8	7	8	8	7	8	9	9	8	8	30.3	30.3	30.3	34.869	307	307	1	109	0	272.34	23.8	28	28
NP_001008282.1;XP_006247334.1	NP_001008282.1;XP_006247334.1	23;22	23;22	23;22	NP_001008282.1 26S proteasome non-ATPase regulatory subunit 3 [Rattus norvegicus];XP_006247334.1 PREDICTED: 26S proteasome non-ATPase regulatory subunit 3 isoform X1 [Rattus norvegicus]	2	23	23	23	12	7	9	12	14	15	14	18	15	12	7	9	12	14	15	14	18	15	12	7	9	12	14	15	14	18	15	49.2	49.2	49.2	60.687	530	530;565	1	143	0	138.26	32.1	23.4	27.7
NP_001008283.1	NP_001008283.1	11	11	11	NP_001008283.1 galactokinase [Rattus norvegicus]	1	11	11	11	5	5	4	4	5	6	3	6	7	5	5	4	4	5	6	3	6	7	5	5	4	4	5	6	3	6	7	38.5	38.5	38.5	42.376	392	392	1	51	0	131.94	21.7	20.2	17.3
NP_001008287.1;XP_006234433.1;XP_006234432.1	NP_001008287.1;XP_006234433.1;XP_006234432.1	6;5;5	6;5;5	6;5;5	NP_001008287.1 metaxin-2 [Rattus norvegicus];XP_006234433.1 PREDICTED: metaxin-2 isoform X2 [Rattus norvegicus];XP_006234432.1 PREDICTED: metaxin-2 isoform X1 [Rattus norvegicus]	3	6	6	6	5	4	1	3	2	2	3	3	3	5	4	1	3	2	2	3	3	3	5	4	1	3	2	2	3	3	3	36.1	36.1	36.1	29.718	263	263;216;260	1	36	0	65.285	31.9	23.6	3.8
NP_001008290.1	NP_001008290.1	11	11	11	NP_001008290.1 ribosome maturation protein SBDS [Rattus norvegicus]	1	11	11	11	4	5	7	5	8	5	3	6	3	4	5	7	5	8	5	3	6	3	4	5	7	5	8	5	3	6	3	37.6	37.6	37.6	28.752	250	250	1	54	0	106.28	18.4	25.6	27.6
NP_001008292.1	NP_001008292.1	7	7	7	NP_001008292.1 tuftelin-interacting protein 11 [Rattus norvegicus]	1	7	7	7	1	2	1	1	1	1	1	0	1	1	2	1	1	1	1	1	0	1	1	2	1	1	1	1	1	0	1	9.3	9.3	9.3	96.151	837	837	1	9	0.00020076	3.6012	1.6	2.7	1.7
NP_001008293.1;XP_008774321.1;XP_008762402.1;XP_002729586.2;XP_002726674.2	NP_001008293.1;XP_008774321.1;XP_008762402.1;XP_002729586.2;XP_002726674.2	6;5;5;5;5	6;5;5;5;5	6;5;5;5;5	NP_001008293.1 diablo homolog, mitochondrial [Rattus norvegicus];XP_008774321.1 PREDICTED: diablo homolog, mitochondrial-like isoform X2 [Rattus norvegicus];XP_008762402.1 PREDICTED: diablo homolog, mitochondrial-like isoform X2 [Rattus norvegicus];XP_0027	5	6	6	6	4	4	3	2	0	3	1	3	5	4	4	3	2	0	3	1	3	5	4	4	3	2	0	3	1	3	5	43	43	43	26.906	237	237;182;182;253;253	1	27	0	87.255	30.4	31.6	18.1
NP_001008296.1;XP_006250949.1;XP_006250947.1;XP_006250946.1;XP_006250945.1;XP_006250944.1;XP_006250948.1	NP_001008296.1;XP_006250949.1;XP_006250947.1;XP_006250946.1;XP_006250945.1;XP_006250944.1;XP_006250948.1	2;2;2;2;2;2;1	2;2;2;2;2;2;1	2;2;2;2;2;2;1	NP_001008296.1 pre-mRNA 3-end-processing factor FIP1 [Rattus norvegicus];XP_006250949.1 PREDICTED: pre-mRNA 3-end-processing factor FIP1 isoform X6 [Rattus norvegicus];XP_006250947.1 PREDICTED: pre-mRNA 3-end-processing factor FIP1 isoform X4 [Rattus no	7	2	2	2	0	1	1	0	2	0	0	1	1	0	1	1	0	2	0	0	1	1	0	1	1	0	2	0	0	1	1	8.8	8.8	8.8	60.187	536	536;545;568;581;595;604;555	1	6	0	4.4415	0	3.7	3.7
NP_001008301.2	NP_001008301.2	10	8	7	NP_001008301.2 E3 ubiquitin-protein ligase NEDD4-like [Rattus norvegicus]	1	10	8	7	4	5	3	1	5	3	3	5	1	3	4	2	1	3	2	2	4	1	3	4	2	1	2	2	1	3	1	12.1	10.2	9.3	110.91	963	963	1	22	0	9.8489	7	4.6	3
NP_001008306.1	NP_001008306.1	1	1	1	NP_001008306.1 probable RNA-binding protein EIF1AD [Rattus norvegicus]	1	1	1	1	0	0	0	1	0	0	1	0	0	0	0	0	1	0	0	1	0	0	0	0	0	1	0	0	1	0	0	9.6	9.6	9.6	19.076	167	167	1	2	0.00019516	3.1322	0	0	0
NP_001008310.1;XP_006231897.1	NP_001008310.1;XP_006231897.1	8;8	8;8	8;8	NP_001008310.1 transcription factor BTF3 [Rattus norvegicus];XP_006231897.1 PREDICTED: transcription factor BTF3 isoform X1 [Rattus norvegicus]	2	8	8	8	5	6	5	4	5	5	4	7	8	5	6	5	4	5	5	4	7	8	5	6	5	4	5	5	4	7	8	66	66	66	17.699	162	162;206	1	87	0	323.31	47.5	61.1	61.1
NP_001008313.1	NP_001008313.1	1	1	1	NP_001008313.1 serine incorporator 3 precursor [Rattus norvegicus]	1	1	1	1	0	0	0	1	1	1	0	1	0	0	0	0	1	1	1	0	1	0	0	0	0	1	1	1	0	1	0	5.7	5.7	5.7	52.321	472	472	1	4	0	4.1288	0	0	0
NP_001008318.1	NP_001008318.1	15	15	15	NP_001008318.1 endoplasmic reticulum resident protein 44 precursor [Rattus norvegicus]	1	15	15	15	10	11	9	9	8	9	11	10	9	10	11	9	9	8	9	11	10	9	10	11	9	9	8	9	11	10	9	39.2	39.2	39.2	46.878	406	406	1	121	0	237.52	27.3	26.8	23.6
NP_001008320.2	NP_001008320.2	3	3	3	NP_001008320.2 macrophage erythroblast attacher [Rattus norvegicus]	1	3	3	3	1	0	0	0	0	0	0	2	0	1	0	0	0	0	0	0	2	0	1	0	0	0	0	0	0	2	0	7.6	7.6	7.6	45.336	396	396	1	3	0	4.6219	2	0	0
NP_001008321.1	NP_001008321.1	1	1	1	NP_001008321.1 rho-related GTP-binding protein RhoJ [Rattus norvegicus]	1	1	1	1	0	1	0	0	0	0	1	0	0	0	1	0	0	0	0	1	0	0	0	1	0	0	0	0	1	0	0	6.6	6.6	6.6	23.37	211	211	1	2	0.0027691	1.5412	0	6.6	0
NP_001008324.1;XP_017450260.1	NP_001008324.1;XP_017450260.1	2;1	1;1	1;1	NP_001008324.1 phosphomannomutase 1 [Rattus norvegicus];XP_017450260.1 PREDICTED: phosphomannomutase 1 isoform X1 [Rattus norvegicus]	2	2	1	1	1	2	1	0	2	1	0	1	1	0	1	0	0	1	0	0	0	0	0	1	0	0	1	0	0	0	0	8.4	5.7	5.7	29.688	262	262;207	1	2	0.00019172	2.8452	2.7	8.4	2.7
NP_001008325.1	NP_001008325.1	12	12	12	NP_001008325.1 eukaryotic translation initiation factor 4B [Rattus norvegicus]	1	12	12	12	6	4	5	6	6	5	7	7	5	6	4	5	6	6	5	7	7	5	6	4	5	6	6	5	7	7	5	22.3	22.3	22.3	69.063	611	611	1	66	0	40.695	12.6	9.7	11.8
NP_001008327.1;XP_006243063.1	NP_001008327.1;XP_006243063.1	7;5	7;5	7;5	NP_001008327.1 oligoribonuclease, mitochondrial precursor [Rattus norvegicus];XP_006243063.1 PREDICTED: oligoribonuclease, mitochondrial isoform X1 [Rattus norvegicus]	2	7	7	7	2	3	3	2	3	2	3	3	4	2	3	3	2	3	2	3	3	4	2	3	3	2	3	2	3	3	4	25.7	25.7	25.7	26.751	237	237;254	1	32	0	76.139	12.2	12.7	16
NP_001008328.1	NP_001008328.1	2	2	2	NP_001008328.1 MIP18 family protein FAM96A precursor [Rattus norvegicus]	1	2	2	2	0	1	1	2	0	1	2	0	0	0	1	1	2	0	1	2	0	0	0	1	1	2	0	1	2	0	0	12.5	12.5	12.5	18.382	160	160	1	7	0	5.1928	0	5.6	5.6
NP_001008329.1;XP_008764722.1;XP_006243787.1	NP_001008329.1;XP_008764722.1;XP_006243787.1	8;8;8	8;8;8	8;8;8	NP_001008329.1 poly [ADP-ribose] polymerase 3 [Rattus norvegicus];XP_008764722.1 PREDICTED: poly [ADP-ribose] polymerase 3 isoform X1 [Rattus norvegicus];XP_006243787.1 PREDICTED: poly [ADP-ribose] polymerase 3 isoform X1 [Rattus norvegicus]	3	8	8	8	2	4	4	3	2	4	3	3	4	2	4	4	3	2	4	3	3	4	2	4	4	3	2	4	3	3	4	17.7	17.7	17.7	58.868	526	526;531;531	1	29	0	28.111	3.6	9.3	9.3
NP_001008331.1	NP_001008331.1	6	6	6	NP_001008331.1 DNA-directed RNA polymerases I and III subunit RPAC1 [Rattus norvegicus]	1	6	6	6	3	1	2	1	2	2	4	1	1	3	1	2	1	2	2	4	1	1	3	1	2	1	2	2	4	1	1	20.8	20.8	20.8	39.017	346	346	1	18	0	11.251	11.6	3.8	6.4
NP_001008335.1	NP_001008335.1	1	1	1	NP_001008335.1 sigma intracellular receptor 2 [Rattus norvegicus]	1	1	1	1	0	1	0	0	0	0	1	0	0	0	1	0	0	0	0	1	0	0	0	1	0	0	0	0	1	0	0	8.5	8.5	8.5	20.946	176	176	1	2	0.0042244	1.2804	0	8.5	0
NP_001008336.1;XP_006248596.1;XP_006248597.1	NP_001008336.1;XP_006248596.1;XP_006248597.1	24;23;20	11;10;7	11;10;7	NP_001008336.1 eukaryotic initiation factor 4A-II [Rattus norvegicus];XP_006248596.1 PREDICTED: eukaryotic initiation factor 4A-II isoform X1 [Rattus norvegicus];XP_006248597.1 PREDICTED: eukaryotic initiation factor 4A-II isoform X2 [Rattus norvegicus]	3	24	11	11	16	19	16	15	13	16	15	14	18	9	9	9	6	5	7	5	4	7	9	9	9	6	5	7	5	4	7	67.6	39.3	39.3	46.402	407	407;408;363	1	82	0	205.91	52.6	56	55.8
NP_001008338.1	NP_001008338.1	9	9	9	NP_001008338.1 tRNA methyltransferase 10 homolog C precursor [Rattus norvegicus]	1	9	9	9	3	0	0	2	1	2	2	4	4	3	0	0	2	1	2	2	4	4	3	0	0	2	1	2	2	4	4	27.1	27.1	27.1	48.292	414	414	1	18	0	8.337	8.7	0	0
NP_001008340.1	NP_001008340.1	4	4	4	NP_001008340.1 negative elongation factor A [Rattus norvegicus]	1	4	4	4	2	1	1	1	2	1	3	1	4	2	1	1	1	2	1	3	1	4	2	1	1	1	2	1	3	1	4	9.2	9.2	9.2	57.54	530	530	1	16	0	8.5891	4.7	1.9	1.9
NP_001008343.1;XP_008770087.1	NP_001008343.1;XP_008770087.1	4;3	4;3	4;3	NP_001008343.1 1,5-anhydro-D-fructose reductase [Rattus norvegicus];XP_008770087.1 PREDICTED: 1,5-anhydro-D-fructose reductase isoform X1 [Rattus norvegicus]	2	4	4	4	1	0	1	1	2	3	0	2	2	1	0	1	1	2	3	0	2	2	1	0	1	1	2	3	0	2	2	15.9	15.9	15.9	34.499	301	301;262	1	12	0	8.1372	4.7	0	4.7
NP_001008344.1	NP_001008344.1	3	3	3	NP_001008344.1 mitochondrial import inner membrane translocase subunit Tim21 precursor [Rattus norvegicus]	1	3	3	3	0	0	0	1	2	0	1	0	1	0	0	0	1	2	0	1	0	1	0	0	0	1	2	0	1	0	1	12.7	12.7	12.7	27.876	245	245	1	6	0.00054259	2.1281	0	0	0
NP_001008345.1	NP_001008345.1	16	16	16	NP_001008345.1 eukaryotic peptide chain release factor subunit 1 [Rattus norvegicus]	1	16	16	16	8	10	10	5	10	11	7	8	8	8	10	10	5	10	11	7	8	8	8	10	10	5	10	11	7	8	8	39.6	39.6	39.6	49.03	437	437	1	95	0	80.567	25.2	26.5	27.2
NP_001008346.1;XP_017444658.1	NP_001008346.1;XP_017444658.1	6;4	6;4	6;4	NP_001008346.1 LRP chaperone MESD precursor [Rattus norvegicus];XP_017444658.1 PREDICTED: LDLR chaperone MESD isoform X1 [Rattus norvegicus]	2	6	6	6	3	4	4	2	6	5	3	4	4	3	4	4	2	6	5	3	4	4	3	4	4	2	6	5	3	4	4	29.9	29.9	29.9	25.215	224	224;197	1	47	0	39.837	21.4	25.9	21.4
NP_001008353.1;XP_017446383.1	NP_001008353.1	3;1	3;1	3;1	NP_001008353.1 phosphomevalonate kinase [Rattus norvegicus]	2	3	3	3	1	1	2	1	2	0	0	2	1	1	1	2	1	2	0	0	2	1	1	1	2	1	2	0	0	2	1	16.5	16.5	16.5	22.281	194	194;119	1	10	0.00072033	2.0532	4.1	4.1	12.4
NP_001008355.1;XP_006234131.1	NP_001008355.1;XP_006234131.1	3;2	3;2	3;2	NP_001008355.1 ribosome-recycling factor, mitochondrial precursor [Rattus norvegicus];XP_006234131.1 PREDICTED: ribosome-recycling factor, mitochondrial isoform X1 [Rattus norvegicus]	2	3	3	3	1	1	1	1	1	0	1	1	0	1	1	1	1	1	0	1	1	0	1	1	1	1	1	0	1	1	0	18.3	18.3	18.3	29.152	262	262;210	1	7	0	10.646	6.1	6.5	6.5
NP_001008356.1	NP_001008356.1	7	7	7	NP_001008356.1 ER membrane protein complex subunit 3 [Rattus norvegicus]	1	7	7	7	4	3	5	4	5	3	1	4	3	4	3	5	4	5	3	1	4	3	4	3	5	4	5	3	1	4	3	37.2	37.2	37.2	29.98	261	261	1	34	0	80.691	23	17.6	29.5
NP_001008366.1;XP_017456799.1;XP_006255207.1	NP_001008366.1;XP_017456799.1;XP_006255207.1	11;10;10	11;10;10	11;10;10	NP_001008366.1 target of Myb protein 1 [Rattus norvegicus];XP_017456799.1 PREDICTED: target of Myb protein 1 isoform X2 [Rattus norvegicus];XP_006255207.1 PREDICTED: target of Myb protein 1 isoform X1 [Rattus norvegicus]	3	11	11	11	8	6	7	7	9	7	8	7	5	8	6	7	7	9	7	8	7	5	8	6	7	7	9	7	8	7	5	38.2	38.2	38.2	54.088	492	492;459;486	1	80	0	130.5	32.1	25.6	29.7
NP_001008368.1;XP_006228336.1	NP_001008368.1;XP_006228336.1	4;4	4;4	4;4	NP_001008368.1 isochorismatase domain-containing protein 2 [Rattus norvegicus];XP_006228336.1 PREDICTED: isochorismatase domain-containing protein 2 isoform X1 [Rattus norvegicus]	2	4	4	4	3	2	2	2	2	2	2	3	1	3	2	2	2	2	2	2	3	1	3	2	2	2	2	2	2	3	1	41.4	41.4	41.4	23.157	210	210;212	1	29	0	29.514	31.9	20	20
NP_001008369.1;XP_006228738.1;XP_006228737.1;XP_017444842.1;XP_006228735.1;XP_006228734.1	NP_001008369.1;XP_006228738.1;XP_006228737.1;XP_017444842.1;XP_006228735.1;XP_006228734.1	6;6;6;6;6;6	6;6;6;6;6;6	6;6;6;6;6;6	NP_001008369.1 NAD-dependent protein deacetylase sirtuin-2 [Rattus norvegicus];XP_006228738.1 PREDICTED: NAD-dependent protein deacetylase sirtuin-2 isoform X5 [Rattus norvegicus];XP_006228737.1 PREDICTED: NAD-dependent protein deacetylase sirtuin-2 isofor	6	6	6	6	4	3	4	1	4	4	1	4	4	4	3	4	1	4	4	1	4	4	4	3	4	1	4	4	1	4	4	24	24	24	39.319	350	350;388;417;423;460;489	1	32	0	89.995	16.9	10.3	14
NP_001008375.1	NP_001008375.1	8	8	8	NP_001008375.1 membrane-associated progesterone receptor component 2 [Rattus norvegicus]	1	8	8	8	4	1	2	2	3	2	4	4	2	4	1	2	2	3	2	4	4	2	4	1	2	2	3	2	4	4	2	38.2	38.2	38.2	23.403	217	217	1	24	0	20.368	21.2	10.1	21.2
NP_001008377.1	NP_001008377.1	7	7	7	NP_001008377.1 trafficking protein particle complex subunit 3 [Rattus norvegicus]	1	7	7	7	4	3	2	2	4	4	4	4	3	4	3	2	2	4	4	4	4	3	4	3	2	2	4	4	4	4	3	33.9	33.9	33.9	20.302	180	180	1	40	0	42.547	25.6	19.4	15
NP_001008382.1;XP_008765496.1;XP_017452028.1;XP_006245489.1;XP_006245487.1;XP_006245485.1;XP_006245484.1	NP_001008382.1;XP_008765496.1;XP_017452028.1;XP_006245489.1;XP_006245487.1;XP_006245485.1;XP_006245484.1	2;2;2;2;2;2;2	2;2;2;2;2;2;2	2;2;2;2;2;2;2	NP_001008382.1 NEDD8-conjugating enzyme UBE2F [Rattus norvegicus];XP_008765496.1 PREDICTED: NEDD8-conjugating enzyme UBE2F isoform X2 [Rattus norvegicus];XP_017452028.1 PREDICTED: NEDD8-conjugating enzyme UBE2F isoform X1 [Rattus norvegicus];XP_006245489.1	7	2	2	2	1	1	2	1	0	0	0	0	0	1	1	2	1	0	0	0	0	0	1	1	2	1	0	0	0	0	0	26.4	26.4	26.4	18.631	163	163;175;185;185;185;185;185	1	5	0	4.6496	18.4	18.4	26.4
NP_001008387.1	NP_001008387.1	1	1	1	NP_001008387.1 D-ribitol-5-phosphate cytidylyltransferase [Rattus norvegicus]	1	1	1	1	1	1	0	0	0	1	0	0	0	1	1	0	0	0	1	0	0	0	1	1	0	0	0	1	0	0	0	3.8	3.8	3.8	49.191	447	447	1	3	0	3.7747	3.8	3.8	0
NP_001008399.1	NP_001008399.1	1	1	1	NP_001008399.1 GTPase, IMAP family member 9 [Rattus norvegicus]	1	1	1	1	0	0	0	0	0	0	0	0	1	0	0	0	0	0	0	0	0	1	0	0	0	0	0	0	0	0	1	4.8	4.8	4.8	33.171	290	290	1	1	0.0069767	1.0881	0	0	0
NP_001008510.1	NP_001008510.1	3	3	3	NP_001008510.1 interferon-stimulated gene 20 kDa protein [Rattus norvegicus]	1	3	3	3	1	2	1	1	1	1	2	2	2	1	2	1	1	1	1	2	2	2	1	2	1	1	1	1	2	2	2	18.2	18.2	18.2	20.514	181	181	1	13	0.00019531	3.1508	4.4	11	4.4
NP_001008511.2;XP_006230817.1;NP_001008516.2;XP_017449590.1;XP_008762981.1	NP_001008511.2;XP_006230817.1;NP_001008516.2;XP_017449590.1;XP_008762981.1	2;2;1;1;1	2;2;1;1;1	2;2;1;1;1	NP_001008511.2 steroid hormone receptor ERR1 [Rattus norvegicus];XP_006230817.1 PREDICTED: steroid hormone receptor ERR1 isoform X1 [Rattus norvegicus];NP_001008516.2 steroid hormone receptor ERR2 [Rattus norvegicus];XP_017449590.1 PREDICTED: steroid hormo	5	2	2	2	2	2	2	1	1	1	0	1	1	2	2	2	1	1	1	0	1	1	2	2	2	1	1	1	0	1	1	5.9	5.9	5.9	45.464	422	422;499;433;454;454	1	12	0	5.2006	5.9	5.9	5.9
NP_001008515.1	NP_001008515.1	4	4	4	NP_001008515.1 complement C1q subcomponent subunit A precursor [Rattus norvegicus]	1	4	4	4	3	2	3	2	3	2	2	2	2	3	2	3	2	3	2	2	2	2	3	2	3	2	3	2	2	2	2	21.6	21.6	21.6	25.917	245	245	1	27	0	16.066	17.1	11.4	15.9
NP_001008518.1	NP_001008518.1	6	6	6	NP_001008518.1 normal mucosa of esophagus-specific gene 1 protein [Rattus norvegicus]	1	6	6	6	5	3	4	5	5	5	4	4	3	5	3	4	5	5	5	4	4	3	5	3	4	5	5	5	4	4	3	49.4	49.4	49.4	9.5981	83	83	1	75	0	249.26	49.4	39.8	39.8
NP_001008519.1	NP_001008519.1	55	55	55	NP_001008519.1 leucine-rich PPR motif-containing protein, mitochondrial precursor [Rattus norvegicus]	1	55	55	55	30	34	29	30	38	39	30	35	36	30	34	29	30	38	39	30	35	36	30	34	29	30	38	39	30	35	36	39	39	39	156.65	1392	1392	1	385	0	323.31	27.4	27.3	24
NP_001008521.1	NP_001008521.1	16	16	14	NP_001008521.1 twinfilin-1 [Rattus norvegicus]	1	16	16	14	12	11	11	11	10	9	11	9	12	12	11	11	11	10	9	11	9	12	11	10	10	9	9	9	11	8	12	48.3	48.3	44.3	40.09	350	350	1	138	0	323.31	43.4	41.1	38.9
NP_001008522.1;XP_017451948.1	NP_001008522.1;XP_017451948.1	1;1	1;1	1;1	NP_001008522.1 aldehyde oxidase 2 [Rattus norvegicus];XP_017451948.1 PREDICTED: aldehyde oxidase 2 isoform X1 [Rattus norvegicus]	2	1	1	1	0	0	1	0	0	0	0	0	0	0	0	1	0	0	0	0	0	0	0	0	1	0	0	0	0	0	0	0.7	0.7	0.7	147.87	1345	1345;1401	1	1	0.0005533	2.399	0	0	0.7
NP_001008524.1;XP_006239287.1	NP_001008524.1;XP_006239287.1	2;2	2;2	2;2	NP_001008524.1 complement C1q subcomponent subunit C precursor [Rattus norvegicus];XP_006239287.1 PREDICTED: complement C1q subcomponent subunit C isoform X1 [Rattus norvegicus]	2	2	2	2	1	0	0	0	0	0	1	2	2	1	0	0	0	0	0	1	2	2	1	0	0	0	0	0	1	2	2	11.4	11.4	11.4	25.686	245	245;248	1	6	0	5.356	7.3	0	0
NP_001008562.1	NP_001008562.1	6	6	6	NP_001008562.1 LIM and cysteine-rich domains protein 1 [Rattus norvegicus]	1	6	6	6	0	1	2	2	2	2	4	4	1	0	1	2	2	2	2	4	4	1	0	1	2	2	2	2	4	4	1	21.6	21.6	21.6	41.085	365	365	1	18	0	18.302	0	5.2	10.4
NP_001008694.1	NP_001008694.1	13	13	13	NP_001008694.1 reticulocalbin-3 precursor [Rattus norvegicus]	1	13	13	13	10	5	6	10	9	9	6	9	7	10	5	6	10	9	9	6	9	7	10	5	6	10	9	9	6	9	7	57.9	57.9	57.9	37.941	328	328	1	107	0	271.13	54.6	33.8	30.2
NP_001008725.2;XP_017446127.1;XP_008758958.1;XP_006231990.1	NP_001008725.2;XP_017446127.1;XP_008758958.1;XP_006231990.1	2;2;2;2	2;2;2;2	2;2;2;2	NP_001008725.2 interleukin-6 receptor subunit beta precursor [Rattus norvegicus];XP_017446127.1 PREDICTED: interleukin-6 receptor subunit beta isoform X1 [Rattus norvegicus];XP_008758958.1 PREDICTED: interleukin-6 receptor subunit beta isoform X1 [Rattus n	4	2	2	2	1	0	0	0	1	0	0	1	1	1	0	0	0	1	0	0	1	1	1	0	0	0	1	0	0	1	1	2.7	2.7	2.7	102.59	918	918;934;934;934	1	4	0.0001941	3.0586	1.4	0	0
NP_001008765.1;XP_006246444.1	NP_001008765.1;XP_006246444.1	6;6	6;6	3;3	NP_001008765.1 interferon gamma induced GTPase [Rattus norvegicus];XP_006246444.1 PREDICTED: interferon gamma induced GTPase isoform X1 [Rattus norvegicus]	2	6	6	3	5	5	5	0	3	2	1	2	1	5	5	5	0	3	2	1	2	1	2	2	2	0	1	1	1	1	0	20.6	20.6	8.6	50.308	441	441;442	1	27	0	67.022	17.9	18.6	17.9
NP_001008766.1	NP_001008766.1	2	2	2	NP_001008766.1 probable cytosolic iron-sulfur protein assembly protein CIAO1 [Rattus norvegicus]	1	2	2	2	1	2	1	0	2	2	1	1	1	1	2	1	0	2	2	1	1	1	1	2	1	0	2	2	1	1	1	12.7	12.7	12.7	37.617	339	339	1	14	0	22.783	6.2	12.7	6.2
NP_001008767.1	NP_001008767.1	7	7	7	NP_001008767.1 thioredoxin-interacting protein [Rattus norvegicus]	1	7	7	7	3	3	4	3	2	3	3	3	2	3	3	4	3	2	3	3	3	2	3	3	4	3	2	3	3	3	2	25.6	25.6	25.6	44.017	394	394	1	30	0	28.228	11.7	12.7	10.7
NP_001008802.2;CON__Q3TTY5	NP_001008802.2	8;3	2;0	1;0	NP_001008802.2 keratin, type II cytoskeletal 1 [Rattus norvegicus]	2	8	2	1	4	3	2	3	5	3	3	2	2	2	0	0	0	0	0	0	0	0	1	0	0	0	0	0	0	0	0	12.5	2.9	1.6	64.756	625	625;707	1	2	0.00054348	2.1455	6.1	4.3	3
NP_001008831.1	NP_001008831.1	1	1	1	NP_001008831.1 rano class II histocompatibility antigen, B alpha chain precursor [Rattus norvegicus]	1	1	1	1	1	1	0	0	0	0	0	0	0	1	1	0	0	0	0	0	0	0	1	1	0	0	0	0	0	0	0	4.7	4.7	4.7	28.237	255	255	1	3	0.00019639	3.2294	4.7	4.7	0
NP_001008842.1;XP_008756412.2	NP_001008842.1;XP_008756412.2	4;4	1;1	0;0	NP_001008842.1 RT1 class I, locus CE4 precursor [Rattus norvegicus];XP_008756412.2 PREDICTED: RT1 class I, locus CE4 isoform X1 [Rattus norvegicus]	2	4	1	0	2	3	1	3	2	3	2	2	2	1	1	1	1	1	1	1	1	1	0	0	0	0	0	0	0	0	0	9.4	3.8	0	42.082	373	373;422	1	11	0	12.303	6.2	8.3	3.8
NP_001008847.1	NP_001008847.1	4	4	4	NP_001008847.1 RT1 class II, locus Da precursor [Rattus norvegicus]	1	4	4	4	2	2	3	3	1	2	2	3	2	2	2	3	3	1	2	2	3	2	2	2	3	3	1	2	2	3	2	18.8	18.8	18.8	29.17	255	255	1	28	0	9.9048	12.9	12.9	16.1
NP_001008888.1	NP_001008888.1	16	16	16	NP_001008888.1 cytochrome b-c1 complex subunit Rieske, mitochondrial [Rattus norvegicus]	1	16	16	16	16	14	12	11	9	9	10	8	7	16	14	12	11	9	9	10	8	7	16	14	12	11	9	9	10	8	7	53.6	53.6	53.6	29.445	274	274	1	150	0	311.56	53.6	51.1	51.1
NP_001008891.2;XP_006253897.1	NP_001008891.2;XP_006253897.1	4;3	4;3	4;3	NP_001008891.2 translocon-associated protein subunit alpha precursor [Rattus norvegicus];XP_006253897.1 PREDICTED: translocon-associated protein subunit alpha isoform X1 [Rattus norvegicus]	2	4	4	4	3	4	4	3	4	4	3	4	4	3	4	4	3	4	4	3	4	4	3	4	4	3	4	4	3	4	4	20.9	20.9	20.9	32.207	287	287;292	1	42	0	58.202	17.1	20.9	20.9
NP_001009180.1	NP_001009180.1	14	14	12	NP_001009180.1 F-actin-capping protein subunit alpha-2 [Rattus norvegicus]	1	14	14	12	12	13	11	10	9	10	12	10	11	12	13	11	10	9	10	12	10	11	10	11	9	8	7	8	10	8	9	63.6	63.6	54.2	32.967	286	286	1	174	0	323.31	63.3	60.8	60.5
NP_001009239.1	NP_001009239.1	18	18	18	NP_001009239.1 40S ribosomal protein S3 [Rattus norvegicus]	1	18	18	18	16	12	12	15	16	16	13	16	16	16	12	12	15	16	16	13	16	16	16	12	12	15	16	16	13	16	16	67.1	67.1	67.1	26.674	243	243	1	215	0	276.78	60.1	50.2	46.5
NP_001009255.1	NP_001009255.1	2	1	1	NP_001009255.1 serine/arginine-rich splicing factor 9 [Rattus norvegicus]	1	2	1	1	0	1	1	1	1	1	1	1	1	0	0	1	0	0	0	0	0	0	0	0	1	0	0	0	0	0	0	7.2	4.1	4.1	25.498	221	221	1	1	0.007947	1.0419	0	3.2	4.1
NP_001009264.1	NP_001009264.1	3	3	3	NP_001009264.1 MORF4 family-associated protein 1 [Rattus norvegicus]	1	3	3	3	0	2	1	1	0	0	0	2	0	0	2	1	1	0	0	0	2	0	0	2	1	1	0	0	0	2	0	32.8	32.8	32.8	14.222	125	125	1	6	0	4.2184	0	26.4	18.4
NP_001009268.1;XP_017454617.1	NP_001009268.1;XP_017454617.1	11;10	11;10	11;10	NP_001009268.1 actin-related protein 2 [Rattus norvegicus];XP_017454617.1 PREDICTED: actin-related protein 2 isoform X1 [Rattus norvegicus]	2	11	11	11	10	8	7	9	10	10	10	10	10	10	8	7	9	10	10	10	10	10	10	8	7	9	10	10	10	10	10	35	35	35	44.733	394	394;399	1	147	0	226.82	33	28.2	24.4
NP_001009275.1	NP_001009275.1	4	3	2	NP_001009275.1 enoyl-Coenzyme A delta isomerase 3 [Rattus norvegicus]	1	4	3	2	1	2	3	2	2	2	1	2	2	0	1	2	1	1	1	0	1	1	0	1	2	1	1	1	0	1	1	19.5	16.5	12.5	33.686	303	303	1	9	0	5.5011	3	6.9	15.5
NP_001009290.1	NP_001009290.1	7	7	7	NP_001009290.1 NADH dehydrogenase [ubiquinone] 1 subunit C2 [Rattus norvegicus]	1	7	7	7	3	3	2	5	6	5	5	6	4	3	3	2	5	6	5	5	6	4	3	3	2	5	6	5	5	6	4	44.2	44.2	44.2	14.359	120	120	1	70	0	22.386	19.2	19.2	18.3
NP_001009349.1;XP_008764666.1;XP_008764664.1	NP_001009349.1;XP_008764666.1;XP_008764664.1	4;3;3	4;3;3	4;3;3	NP_001009349.1 5-formyltetrahydrofolate cyclo-ligase [Rattus norvegicus];XP_008764666.1 PREDICTED: 5-formyltetrahydrofolate cyclo-ligase isoform X1 [Rattus norvegicus];XP_008764664.1 PREDICTED: 5-formyltetrahydrofolate cyclo-ligase isoform X1 [Rattus norve	3	4	4	4	1	1	2	1	1	0	1	2	1	1	1	2	1	1	0	1	2	1	1	1	2	1	1	0	1	2	1	27.6	27.6	27.6	23.24	203	203;146;146	1	10	0	8.0869	10.3	10.3	17.2
NP_001009353.1;XP_006244668.1	NP_001009353.1;XP_006244668.1	2;2	2;2	2;2	NP_001009353.1 platelet-activating factor acetylhydrolase precursor [Rattus norvegicus];XP_006244668.1 PREDICTED: platelet-activating factor acetylhydrolase isoform X1 [Rattus norvegicus]	2	2	2	2	0	0	0	0	1	1	0	1	1	0	0	0	0	1	1	0	1	1	0	0	0	0	1	1	0	1	1	6.4	6.4	6.4	49.49	440	440;473	1	4	0.00071544	1.9567	0	0	0
NP_001009357.1	NP_001009357.1	8	8	8	NP_001009357.1 CCR4-NOT transcription complex subunit 9 [Rattus norvegicus]	1	8	8	8	3	4	2	2	4	4	3	3	3	3	4	2	2	4	4	3	3	3	3	4	2	2	4	4	3	3	3	30.1	30.1	30.1	33.601	299	299	1	30	0	88.568	14	18.7	10.4
NP_001009369.2;XP_008766594.1	NP_001009369.2;XP_008766594.1	4;3	4;3	4;3	NP_001009369.2 39S ribosomal protein L38, mitochondrial [Rattus norvegicus];XP_008766594.1 PREDICTED: 39S ribosomal protein L38, mitochondrial isoform X1 [Rattus norvegicus]	2	4	4	4	2	2	3	2	1	1	1	2	1	2	2	3	2	1	1	1	2	1	2	2	3	2	1	1	1	2	1	13.7	13.7	13.7	44.837	380	380;346	1	15	0	16.051	6.1	6.1	9.5
NP_001009391.1;XP_008768245.1	NP_001009391.1;XP_008768245.1	4;3	4;3	4;3	NP_001009391.1 enolase-phosphatase E1 [Rattus norvegicus];XP_008768245.1 PREDICTED: enolase-phosphatase E1 isoform X2 [Rattus norvegicus]	2	4	4	4	2	2	2	2	2	3	3	1	0	2	2	2	2	2	3	3	1	0	2	2	2	2	2	3	3	1	0	21.1	21.1	21.1	28.874	261	261;176	1	20	0	32.669	11.5	11.5	11.5
NP_001009409.1	NP_001009409.1	3	3	3	NP_001009409.1 N-acylneuraminate-9-phosphatase [Rattus norvegicus]	1	3	3	3	1	1	1	1	3	2	1	3	1	1	1	1	1	3	2	1	3	1	1	1	1	1	3	2	1	3	1	16.5	16.5	16.5	27.741	248	248	1	18	0	48.342	7.3	7.3	7.3
NP_001009419.1	NP_001009419.1	16	16	16	NP_001009419.1 N-acylneuraminate cytidylyltransferase [Rattus norvegicus]	1	16	16	16	13	8	4	9	8	9	9	9	9	13	8	4	9	8	9	9	9	9	13	8	4	9	8	9	9	9	9	36.6	36.6	36.6	48.14	432	432	1	104	0	136.29	32.2	23.6	16.2
NP_001009424.1	NP_001009424.1	12	12	12	NP_001009424.1 epidermal growth factor receptor substrate 15 [Rattus norvegicus]	1	12	12	12	9	5	8	4	5	7	7	3	7	9	5	8	4	5	7	7	3	7	9	5	8	4	5	7	7	3	7	23.7	23.7	23.7	86.728	792	792	1	61	0	168.17	18.4	11.5	15.8
NP_001009430.2	NP_001009430.2	8	8	7	NP_001009430.2 inhibitor of nuclear factor kappa-B kinase-interacting protein [Rattus norvegicus]	1	8	8	7	4	2	3	3	2	4	1	1	0	4	2	3	3	2	4	1	1	0	3	2	2	2	2	3	0	1	0	33.2	33.2	29.2	42.36	373	373	1	21	0	105.7	18.8	10.2	14.7
NP_001009474.1	NP_001009474.1	6	6	6	NP_001009474.1 pirin [Rattus norvegicus]	1	6	6	6	2	4	4	4	4	4	5	4	3	2	4	4	4	4	4	5	4	3	2	4	4	4	4	4	5	4	3	24.4	24.4	24.4	32.178	291	291	1	50	0	64.501	10.3	16.8	16.8
NP_001009478.1	NP_001009478.1	1	1	1	NP_001009478.1 serum amyloid A-4 protein precursor [Rattus norvegicus]	1	1	1	1	0	0	0	0	1	1	1	0	0	0	0	0	0	1	1	1	0	0	0	0	0	0	1	1	1	0	0	9.2	9.2	9.2	14.973	130	130	1	4	0.0005569	2.4954	0	0	0
NP_001009480.1	NP_001009480.1	1	1	1	NP_001009480.1 cytochrome b-c1 complex subunit 6, mitochondrial [Rattus norvegicus]	1	1	1	1	1	1	1	1	1	1	1	1	1	1	1	1	1	1	1	1	1	1	1	1	1	1	1	1	1	1	1	27	27	27	10.424	89	89	1	15	0	26.8	27	27	27
NP_001009489.1;XP_006249463.1;XP_006249462.1	NP_001009489.1;XP_006249463.1;XP_006249462.1	1;1;1	1;1;1	1;1;1	NP_001009489.1 2 -5 oligoadenylate synthetase 1K [Rattus norvegicus];XP_006249463.1 PREDICTED: 2 -5 oligoadenylate synthetase 1K isoform X2 [Rattus norvegicus];XP_006249462.1 PREDICTED: 2 -5 oligoadenylate synthetase 1K isoform X1 [Rattus norve	3	1	1	1	1	0	0	0	0	0	0	0	0	1	0	0	0	0	0	0	0	0	1	0	0	0	0	0	0	0	0	4	4	4	40.672	353	353;356;356	1	1	0.0007202	2.0523	4	0	0
NP_001009536.1	NP_001009536.1	13	13	13	NP_001009536.1 E3 ubiquitin/ISG15 ligase TRIM25 [Rattus norvegicus]	1	13	13	13	6	5	6	8	5	4	8	5	7	6	5	6	8	5	4	8	5	7	6	5	6	8	5	4	8	5	7	23	23	23	71.951	643	643	1	66	0	30.172	10.9	8.9	11.2
NP_001009602.1	NP_001009602.1	7	7	7	NP_001009602.1 actin-related protein 10 [Rattus norvegicus]	1	7	7	7	5	4	4	1	4	4	3	2	4	5	4	4	1	4	4	3	2	4	5	4	4	1	4	4	3	2	4	27.3	27.3	27.3	46.213	417	417	1	33	0	78.791	19.4	11.8	11.8
NP_001009619.1	NP_001009619.1	3	3	3	NP_001009619.1 cytosolic Fe-S cluster assembly factor NUBP1 [Rattus norvegicus]	1	3	3	3	0	0	0	1	3	2	2	3	2	0	0	0	1	3	2	2	3	2	0	0	0	1	3	2	2	3	2	10.6	10.6	10.6	34.045	320	320	1	13	0.00018772	2.6125	0	0	0
NP_001009621.1	NP_001009621.1	2	2	2	NP_001009621.1 nudC domain-containing protein 2 [Rattus norvegicus]	1	2	2	2	1	1	1	0	1	1	1	1	1	1	1	1	0	1	1	1	1	1	1	1	1	0	1	1	1	1	1	22.3	22.3	22.3	17.674	157	157	1	8	0	8.2349	11.5	10.8	10.8
NP_001009622.1	NP_001009622.1	7	4	4	NP_001009622.1 GTP-binding protein SAR1b [Rattus norvegicus]	1	7	4	4	3	6	6	4	7	6	3	5	6	2	3	4	1	4	3	1	2	3	2	3	4	1	4	3	1	2	3	36.9	25.8	25.8	22.41	198	198	1	33	0	24.804	19.7	30.8	36.9
NP_001009625.1	NP_001009625.1	7	7	7	NP_001009625.1 interferon-induced 35 kDa protein [Rattus norvegicus]	1	7	7	7	4	5	4	3	4	4	4	4	4	4	5	4	3	4	4	4	4	4	4	5	4	3	4	4	4	4	4	32.9	32.9	32.9	31.764	286	286	1	49	0	95.909	26.2	24.1	24.1
NP_001009627.1	NP_001009627.1	6	6	6	NP_001009627.1 tyrosine--tRNA ligase, mitochondrial [Rattus norvegicus]	1	6	6	6	1	0	2	0	1	1	1	1	3	1	0	2	0	1	1	1	1	3	1	0	2	0	1	1	1	1	3	21	21	21	52.627	471	471	1	10	0	7.1445	1.9	0	8.7
NP_001009628.1	NP_001009628.1	10	10	5	NP_001009628.1 T-kininogen 2 precursor [Rattus norvegicus]	1	10	10	5	7	7	6	7	7	8	6	4	4	7	7	6	7	7	8	6	4	4	5	3	3	4	4	4	3	2	2	24.2	24.2	14.4	47.704	430	430	1	87	0	262.51	19.8	18.8	18.6
NP_001009630.1;XP_006249495.1	NP_001009630.1;XP_006249495.1	2;1	2;1	2;1	NP_001009630.1 uncharacterized protein C12orf43 homolog [Rattus norvegicus];XP_006249495.1 PREDICTED: uncharacterized protein C12orf43 homolog isoform X1 [Rattus norvegicus]	2	2	2	2	2	1	0	1	1	1	1	1	1	2	1	0	1	1	1	1	1	1	2	1	0	1	1	1	1	1	1	13	13	13	30.056	277	277;268	1	9	0	5.2195	13	7.6	0
NP_001009635.1;XP_017455114.1	NP_001009635.1;XP_017455114.1	4;3	4;3	4;3	NP_001009635.1 SPRY domain-containing protein 7 [Rattus norvegicus];XP_017455114.1 PREDICTED: SPRY domain-containing protein 7 isoform X1 [Rattus norvegicus]	2	4	4	4	0	1	0	2	1	2	1	1	0	0	1	0	2	1	2	1	1	0	0	1	0	2	1	2	1	1	0	23.5	23.5	23.5	21.681	196	196;163	1	9	0.00019084	2.7911	0	5.1	0
NP_001009637.1;XP_006254734.1	NP_001009637.1;XP_006254734.1	24;21	24;21	24;21	NP_001009637.1 leucine--tRNA ligase, cytoplasmic [Rattus norvegicus];XP_006254734.1 PREDICTED: leucine--tRNA ligase, cytoplasmic isoform X1 [Rattus norvegicus]	2	24	24	24	15	12	11	12	13	9	11	12	12	15	12	11	12	13	9	11	12	12	15	12	11	12	13	9	11	12	12	25.3	25.3	25.3	134.28	1178	1178;1128	1	126	0	278.38	17.4	16.1	14.9
NP_001009641.1;XP_006228926.1	NP_001009641.1	12;2	12;2	12;2	NP_001009641.1 xaa-Pro dipeptidase [Rattus norvegicus]	2	12	12	12	7	9	9	9	8	10	7	8	8	7	9	9	9	8	10	7	8	8	7	9	9	9	8	10	7	8	8	28.9	28.9	28.9	54.75	492	492;82	1	95	0	159.56	18.3	23.6	23.6
NP_001009642.1	NP_001009642.1	1	1	1	NP_001009642.1 ribonuclease P protein subunit p29 [Rattus norvegicus]	1	1	1	1	0	0	0	0	0	0	1	1	0	0	0	0	0	0	0	1	1	0	0	0	0	0	0	0	1	1	0	5	5	5	25.633	221	221	1	2	0.0030954	1.4682	0	0	0
NP_001009647.1	NP_001009647.1	5	5	5	NP_001009647.1 39S ribosomal protein L16, mitochondrial precursor [Rattus norvegicus]	1	5	5	5	2	3	1	2	0	0	3	0	1	2	3	1	2	0	0	3	0	1	2	3	1	2	0	0	3	0	1	22.7	22.7	22.7	28.895	251	251	1	16	0	13.204	10.4	14.7	6.4
NP_001009649.1	NP_001009649.1	3	3	3	NP_001009649.1 leupaxin [Rattus norvegicus]	1	3	3	3	0	0	0	1	2	2	2	2	2	0	0	0	1	2	2	2	2	2	0	0	0	1	2	2	2	2	2	8	8	8	43.31	386	386	1	11	0	7.8171	0	0	0
NP_001009651.1	NP_001009651.1	5	5	5	NP_001009651.1 chloride intracellular channel protein 2 [Rattus norvegicus]	1	5	5	5	1	1	1	0	1	3	0	3	2	1	1	1	0	1	3	0	3	2	1	1	1	0	1	3	0	3	2	29	29	29	28.161	245	245	1	15	0	32.943	9	7.3	7.3
NP_001009653.1;XP_017446227.1	NP_001009653.1;XP_017446227.1	24;23	24;23	24;23	NP_001009653.1 methylcrotonoyl-CoA carboxylase subunit alpha, mitochondrial [Rattus norvegicus];XP_017446227.1 PREDICTED: methylcrotonoyl-CoA carboxylase subunit alpha, mitochondrial isoform X1 [Rattus norvegicus]	2	24	24	24	19	16	14	11	13	16	18	16	14	19	16	14	11	13	16	18	16	14	19	16	14	11	13	16	18	16	14	46.9	46.9	46.9	79.329	715	715;649	1	157	0	319.32	41.5	34.4	30.5
NP_001009657.1;XP_017447113.1	NP_001009657.1;XP_017447113.1	3;3	3;3	3;3	NP_001009657.1 histone acetyltransferase type B catalytic subunit [Rattus norvegicus];XP_017447113.1 PREDICTED: histone acetyltransferase type B catalytic subunit isoform X1 [Rattus norvegicus]	2	3	3	3	0	0	0	0	1	1	0	2	1	0	0	0	0	1	1	0	2	1	0	0	0	0	1	1	0	2	1	8.1	8.1	8.1	49.241	419	419;436	1	5	0	3.946	0	0	0
NP_001009663.1	NP_001009663.1	4	4	4	NP_001009663.1 corticosteroid-binding globulin precursor [Rattus norvegicus]	1	4	4	4	2	1	1	3	3	2	2	1	3	2	1	1	3	3	2	2	1	3	2	1	1	3	3	2	2	1	3	12.4	12.4	12.4	44.67	396	396	1	21	0	45.463	6.8	2.8	2.8
NP_001009668.1	NP_001009668.1	16	16	16	NP_001009668.1 electron transfer flavoprotein subunit alpha, mitochondrial [Rattus norvegicus]	1	16	16	16	12	12	12	14	12	11	11	10	10	12	12	12	14	12	11	11	10	10	12	12	12	14	12	11	11	10	10	58.3	58.3	58.3	34.951	333	333	1	175	0	323.31	53.8	51.1	51.1
NP_001009669.1;XP_017451081.1	NP_001009669.1	6;2	6;2	6;2	NP_001009669.1 ubiquitin-like modifier-activating enzyme 5 [Rattus norvegicus]	2	6	6	6	4	1	4	3	3	1	1	3	3	4	1	4	3	3	1	1	3	3	4	1	4	3	3	1	1	3	3	20.8	20.8	20.8	44.895	403	403;293	1	23	0	59.908	16.1	2.5	16.4
NP_001009672.1	NP_001009672.1	4	4	4	NP_001009672.1 small ubiquitin-related modifier 1 precursor [Rattus norvegicus]	1	4	4	4	0	1	2	2	2	2	3	1	3	0	1	2	2	2	2	3	1	3	0	1	2	2	2	2	3	1	3	43.6	43.6	43.6	11.557	101	101	1	21	0	9.1175	0	11.9	18.8
NP_001009679.1	NP_001009679.1	2	2	2	NP_001009679.1 phosphoserine phosphatase [Rattus norvegicus]	1	2	2	2	0	1	1	1	0	0	1	0	0	0	1	1	1	0	0	1	0	0	0	1	1	1	0	0	1	0	0	9.8	9.8	9.8	24.967	225	225	1	4	0.0002019	3.722	0	6.2	6.2
NP_001009681.1;XP_017453833.1	NP_001009681.1	9;3	9;3	9;3	NP_001009681.1 2-5-oligoadenylate synthase-like protein 1 [Rattus norvegicus]	2	9	9	9	4	7	3	1	3	4	3	5	5	4	7	3	1	3	4	3	5	5	4	7	3	1	3	4	3	5	5	24.4	24.4	24.4	59.016	512	512;252	1	39	0	44.21	11.7	19.7	7.2
NP_001009683.1	NP_001009683.1	1	1	1	NP_001009683.1 torsin-3A precursor [Rattus norvegicus]	1	1	1	1	0	0	0	0	0	0	0	0	1	0	0	0	0	0	0	0	0	1	0	0	0	0	0	0	0	0	1	5.1	5.1	5.1	45.166	395	395	1	1	0.0032607	1.4429	0	0	0
NP_001009685.1	NP_001009685.1	8	8	8	NP_001009685.1 developmentally-regulated GTP-binding protein 1 [Rattus norvegicus]	1	8	8	8	3	2	3	3	3	5	4	6	2	3	2	3	3	3	5	4	6	2	3	2	3	3	3	5	4	6	2	26.7	26.7	26.7	40.512	367	367	1	31	0	19.873	10.1	6	8.7
NP_001009688.1	NP_001009688.1	9	9	9	NP_001009688.1 THUMP domain-containing protein 1 [Rattus norvegicus]	1	9	9	9	4	4	4	4	8	6	4	6	8	4	4	4	4	8	6	4	6	8	4	4	4	4	8	6	4	6	8	32	32	32	38.916	353	353	1	53	0	71.089	17.8	15.3	15.3
NP_001009696.1	NP_001009696.1	2	2	2	NP_001009696.1 DCN1-like protein 5 [Rattus norvegicus]	1	2	2	2	0	0	0	0	0	1	1	1	2	0	0	0	0	0	1	1	1	2	0	0	0	0	0	1	1	1	2	8	8	8	27.568	237	237	1	5	0.0056961	1.1915	0	0	0
NP_001009699.1	NP_001009699.1	1	1	1	NP_001009699.1 MAD2L1-binding protein [Rattus norvegicus]	1	1	1	1	0	0	1	1	1	1	0	1	1	0	0	1	1	1	1	0	1	1	0	0	1	1	1	1	0	1	1	6.5	6.5	6.5	31.032	277	277	1	6	0.00037348	2.5486	0	0	6.5
NP_001009701.1	NP_001009701.1	8	8	8	NP_001009701.1 protein FAM234A [Rattus norvegicus]	1	8	8	8	5	6	6	7	6	6	7	6	4	5	6	6	7	6	6	7	6	4	5	6	6	7	6	6	7	6	4	20.8	20.8	20.8	60.636	552	552	1	72	0	171.44	15.8	17.2	17.6
NP_001009702.1	NP_001009702.1	2	2	2	NP_001009702.1 RRP15-like protein [Rattus norvegicus]	1	2	2	2	1	0	0	0	0	0	0	1	0	1	0	0	0	0	0	0	1	0	1	0	0	0	0	0	0	1	0	6.8	6.8	6.8	30.926	280	280	1	2	0.0014092	1.751	3.9	0	0
NP_001009703.1	NP_001009703.1	7	7	7	NP_001009703.1 transmembrane emp24 domain-containing protein 9 precursor [Rattus norvegicus]	1	7	7	7	6	6	4	5	5	5	5	5	6	6	6	4	5	5	5	5	5	6	6	6	4	5	5	5	5	5	6	31.5	31.5	31.5	27.028	235	235	1	75	0	177.52	31.5	31.5	18.3
NP_001009706.1;XP_008758133.1	NP_001009706.1;XP_008758133.1	3;2	3;2	3;2	NP_001009706.1 phospholysine phosphohistidine inorganic pyrophosphate phosphatase [Rattus norvegicus];XP_008758133.1 PREDICTED: phospholysine phosphohistidine inorganic pyrophosphate phosphatase isoform X1 [Rattus norvegicus]	2	3	3	3	2	1	3	1	1	0	0	1	0	2	1	3	1	1	0	0	1	0	2	1	3	1	1	0	0	1	0	17.4	17.4	17.4	29.19	270	270;256	1	10	0	28.074	14.4	7.8	17.4
NP_001009712.1;XP_017458695.1;XP_017449907.1;XP_017449906.1	NP_001009712.1;XP_017458695.1;XP_017449907.1;XP_017449906.1	2;1;1;1	2;1;1;1	2;1;1;1	NP_001009712.1 protein YIPF4 [Rattus norvegicus];XP_017458695.1 PREDICTED: protein YIPF4-like isoform X3 [Rattus norvegicus];XP_017449907.1 PREDICTED: protein YIPF4-like isoform X2 [Rattus norvegicus];XP_017449906.1 PREDICTED: protein YIPF4-like isoform X1	4	2	2	2	0	1	0	0	1	1	0	1	0	0	1	0	0	1	1	0	1	0	0	1	0	0	1	1	0	1	0	8.1	8.1	8.1	27.283	246	246;246;246;246	1	4	0.00054466	2.1734	0	4.5	0
NP_001009717.1	NP_001009717.1	3	3	3	NP_001009717.1 leucine-rich alpha-2-glycoprotein precursor [Rattus norvegicus]	1	3	3	3	0	0	1	1	2	2	0	0	0	0	0	1	1	2	2	0	0	0	0	0	1	1	2	2	0	0	0	12.3	12.3	12.3	36.319	332	332	1	6	0	4.6197	0	0	4.8
NP_001009825.1;XP_008765584.1	NP_001009825.1;XP_008765584.1	20;15	20;15	20;15	NP_001009825.1 protein phosphatase 1 regulatory subunit 7 [Rattus norvegicus];XP_008765584.1 PREDICTED: protein phosphatase 1 regulatory subunit 7 isoform X1 [Rattus norvegicus]	2	20	20	20	9	12	13	12	11	11	11	10	11	9	12	13	12	11	11	11	10	11	9	12	13	12	11	11	11	10	11	61.4	61.4	61.4	41.296	360	360;290	1	127	0	323.31	38.1	45.8	46.4
NP_001009973.1;XP_006249525.1	NP_001009973.1;XP_006249525.1	2;2	2;2	2;2	NP_001009973.1 BTB/POZ domain-containing adapter for CUL3-mediated RhoA degradation protein 3 [Rattus norvegicus];XP_006249525.1 PREDICTED: BTB/POZ domain-containing adapter for CUL3-mediated RhoA degradation protein 3 isoform X1 [Rattus norvegicus]	2	2	2	2	0	0	0	0	0	0	1	0	1	0	0	0	0	0	0	1	0	1	0	0	0	0	0	0	1	0	1	7	7	7	35.744	315	315;316	1	2	0.0038917	1.3021	0	0	0
NP_001010945.1	NP_001010945.1	2	2	2	NP_001010945.1 transmembrane protein 120A [Rattus norvegicus]	1	2	2	2	0	0	1	0	0	0	1	1	1	0	0	1	0	0	0	1	1	1	0	0	1	0	0	0	1	1	1	5	5	5	40.657	343	343	1	4	0.0050378	1.2189	0	0	2.6
NP_001010947.1	NP_001010947.1	6	6	6	NP_001010947.1 methylthioribose-1-phosphate isomerase [Rattus norvegicus]	1	6	6	6	6	4	5	5	5	5	5	5	5	6	4	5	5	5	5	5	5	5	6	4	5	5	5	5	5	5	5	24.4	24.4	24.4	39.587	369	369	1	58	0	153.56	24.4	19.5	22.2
NP_001010958.1;XP_017449674.1;XP_006240603.1;XP_017449673.1	NP_001010958.1;XP_017449674.1;XP_006240603.1;XP_017449673.1	4;4;4;3	4;4;4;3	4;4;4;3	NP_001010958.1 mitochondrial basic amino acids transporter [Rattus norvegicus];XP_017449674.1 PREDICTED: mitochondrial basic amino acids transporter isoform X2 [Rattus norvegicus];XP_006240603.1 PREDICTED: mitochondrial basic amino acids transporter isofor	4	4	4	4	1	0	1	0	1	2	3	2	1	1	0	1	0	1	2	3	2	1	1	0	1	0	1	2	3	2	1	17.6	17.6	17.6	32.634	306	306;310;310;240	1	13	0	6.0007	7.5	0	7.5
NP_001010963.1	NP_001010963.1	9	9	9	NP_001010963.1 zinc finger CCCH domain-containing protein 15 [Rattus norvegicus]	1	9	9	9	3	4	2	4	1	1	5	3	3	3	4	2	4	1	1	5	3	3	3	4	2	4	1	1	5	3	3	28.4	28.4	28.4	48.299	426	426	1	27	0	41.377	7	14.1	8.5
NP_001010967.1	NP_001010967.1	8	8	8	NP_001010967.1 N-acylethanolamine-hydrolyzing acid amidase precursor [Rattus norvegicus]	1	8	8	8	6	6	6	2	4	6	3	4	5	6	6	6	2	4	6	3	4	5	6	6	6	2	4	6	3	4	5	31.8	31.8	31.8	40.313	362	362	1	52	0	140.4	24.9	26.8	26.8
NP_001011891.1;XP_008765780.1	NP_001011891.1;XP_008765780.1	5;3	5;3	5;3	NP_001011891.1 cytosolic Fe-S cluster assembly factor NUBP2 [Rattus norvegicus];XP_008765780.1 PREDICTED: cytosolic Fe-S cluster assembly factor NUBP2 isoform X1 [Rattus norvegicus]	2	5	5	5	1	3	2	0	3	1	1	2	2	1	3	2	0	3	1	1	2	2	1	3	2	0	3	1	1	2	2	17.7	17.7	17.7	28.926	271	271;211	1	20	0	8.4114	3.3	13.3	8.1
NP_001011892.1;XP_017452603.1	NP_001011892.1;XP_017452603.1	12;10	12;10	12;10	NP_001011892.1 alpha-2-antiplasmin precursor [Rattus norvegicus];XP_017452603.1 PREDICTED: alpha-2-antiplasmin isoform X1 [Rattus norvegicus]	2	12	12	12	5	7	5	4	7	6	5	7	6	5	7	5	4	7	6	5	7	6	5	7	5	4	7	6	5	7	6	35.6	35.6	35.6	54.892	491	491;406	1	77	0	98.117	22	23.6	20.8
NP_001011893.1;XP_017452616.1;XP_017452615.1;XP_017452614.1;XP_017452613.1;XP_017452612.1;XP_017452610.1;XP_017452617.1;XP_017452609.1;XP_017452608.1;XP_017452607.1;XP_017452611.1	NP_001011893.1;XP_017452616.1;XP_017452615.1;XP_017452614.1;XP_017452613.1;XP_017452612.1;XP_017452610.1;XP_017452617.1;XP_017452609.1;XP_017452608.1;XP_017452607.1;XP_017452611.1	4;4;4;4;4;4;4;4;4;4;4;2	4;4;4;4;4;4;4;4;4;4;4;2	4;4;4;4;4;4;4;4;4;4;4;2	NP_001011893.1 septin-4 [Rattus norvegicus];XP_017452616.1 PREDICTED: septin-4 isoform X10 [Rattus norvegicus];XP_017452615.1 PREDICTED: septin-4 isoform X9 [Rattus norvegicus];XP_017452614.1 PREDICTED: septin-4 isoform X8 [Rattus norvegicus];XP_017452613.	12	4	4	4	2	0	0	0	0	0	2	2	1	2	0	0	0	0	0	2	2	1	2	0	0	0	0	0	2	2	1	13.1	13.1	13.1	36.212	312	312;331;332;360;379;431;459;478;478;510;577;444	1	7	0	8.1169	8	0	0
NP_001011894.1	NP_001011894.1	9	9	9	NP_001011894.1 proteasome activator complex subunit 3 [Rattus norvegicus]	1	9	9	9	5	4	4	5	3	5	5	8	8	5	4	4	5	3	5	5	8	8	5	4	4	5	3	5	5	8	8	31.9	31.9	31.9	29.506	254	254	1	59	0	52.425	24.4	19.7	18.9
NP_001011896.1	NP_001011896.1	5	5	5	NP_001011896.1 ATP-binding cassette sub-family F member 3 [Rattus norvegicus]	1	5	5	5	1	3	2	1	1	0	2	0	0	1	3	2	1	1	0	2	0	0	1	3	2	1	1	0	2	0	0	8.6	8.6	8.6	79.855	709	709	1	10	0	7.8928	2.4	5.5	3.7
NP_001011898.1	NP_001011898.1	8	8	8	NP_001011898.1 hematopoietic lineage cell-specific protein [Rattus norvegicus]	1	8	8	8	2	3	2	3	4	4	6	7	6	2	3	2	3	4	4	6	7	6	2	3	2	3	4	4	6	7	6	28.4	28.4	28.4	52.823	476	476	1	45	0	45.108	6.3	9.7	6.3
NP_001011901.1	NP_001011901.1	25	24	24	NP_001011901.1 heat shock protein 105 kDa [Rattus norvegicus]	1	25	24	24	13	11	12	12	12	14	16	14	13	13	11	12	11	11	13	15	14	13	13	11	12	11	11	13	15	14	13	39.9	38.8	38.8	96.417	858	858	1	150	0	323.31	19.8	21.2	23.2
NP_001011906.1;XP_017454193.1;XP_006250093.1;XP_006250098.1;XP_017454194.1;XP_006250095.1;XP_006250094.1	NP_001011906.1;XP_017454193.1;XP_006250093.1	3;2;2;1;1;1;1	3;2;2;1;1;1;1	3;2;2;1;1;1;1	NP_001011906.1 acyl-CoA-binding domain-containing protein 6 [Rattus norvegicus];XP_017454193.1 PREDICTED: acyl-CoA-binding domain-containing protein 6 isoform X4 [Rattus norvegicus];XP_006250093.1 PREDICTED: acyl-CoA-binding domain-containing protein 6 iso	7	3	3	3	2	1	1	2	0	1	0	1	0	2	1	1	2	0	1	0	1	0	2	1	1	2	0	1	0	1	0	12.8	12.8	12.8	30.81	282	282;189;219;136;163;195;197	1	8	0	8.083	8.5	4.3	4.3
NP_001011908.2	NP_001011908.2	13	12	12	NP_001011908.2 spectrin alpha chain, erythrocytic 1 [Rattus norvegicus]	1	13	12	12	5	4	4	2	6	5	1	1	1	5	3	3	1	5	4	0	0	0	5	3	3	1	5	4	0	0	0	6.8	6.4	6.4	280.07	2416	2416	1	22	0	31.782	3.2	2.2	2.3
NP_001011910.1	NP_001011910.1	23	23	23	NP_001011910.1 cytosol aminopeptidase [Rattus norvegicus]	1	23	23	23	16	15	14	13	16	13	15	15	17	16	15	14	13	16	13	15	15	17	16	15	14	13	16	13	15	15	17	54.1	54.1	54.1	56.149	519	519	1	175	0	323.31	44.3	35.1	38.3
NP_001011915.1;XP_006251822.1;XP_006251820.1	NP_001011915.1;XP_006251822.1;XP_006251820.1	30;30;30	2;2;2	2;2;2	NP_001011915.1 fermitin family homolog 2 [Rattus norvegicus];XP_006251822.1 PREDICTED: fermitin family homolog 2 isoform X5 [Rattus norvegicus];XP_006251820.1 PREDICTED: fermitin family homolog 2 isoform X3 [Rattus norvegicus]	3	30	2	2	21	18	20	16	17	17	15	17	19	1	1	0	0	0	0	0	0	1	1	1	0	0	0	0	0	0	1	50	5	5	77.875	680	680;687;695	1	3	0	17.854	42.5	34.4	35
NP_001011919.1	NP_001011919.1	4	4	4	NP_001011919.1 tRNA modification GTPase GTPBP3, mitochondrial precursor [Rattus norvegicus]	1	4	4	4	2	2	2	0	2	1	1	1	1	2	2	2	0	2	1	1	1	1	2	2	2	0	2	1	1	1	1	13.4	13.4	13.4	52.017	492	492	1	15	0	7.0659	6.1	6.1	7.7
NP_001011923.1	NP_001011923.1	8	8	8	NP_001011923.1 serine/threonine-protein kinase PRP4 homolog [Rattus norvegicus]	1	8	8	8	3	2	1	0	1	2	2	1	1	3	2	1	0	1	2	2	1	1	3	2	1	0	1	2	2	1	1	9.5	9.5	9.5	117.01	1007	1007	1	13	0	13.214	5.1	2.2	1.3
NP_001011925.1;XP_017456692.1;XP_017456691.1;XP_008770504.1	NP_001011925.1;XP_017456692.1;XP_017456691.1;XP_008770504.1	23;17;17;17	23;17;17;17	23;17;17;17	NP_001011925.1 nuclear pore complex protein Nup93 [Rattus norvegicus];XP_017456692.1 PREDICTED: nuclear pore complex protein Nup93 isoform X1 [Rattus norvegicus];XP_017456691.1 PREDICTED: nuclear pore complex protein Nup93 isoform X1 [Rattus norvegicus];XP	4	23	23	23	7	7	5	9	8	11	7	9	9	7	7	5	9	8	11	7	9	9	7	7	5	9	8	11	7	9	9	36	36	36	93.301	819	819;696;696;696	1	82	0	220.12	16.6	16.1	8.8
NP_001011926.1;XP_006255247.1;XP_006255245.1;XP_006255244.1;XP_006255243.1;XP_017456695.1;XP_017456694.1	NP_001011926.1;XP_006255247.1;XP_006255245.1;XP_006255244.1;XP_006255243.1;XP_017456695.1;XP_017456694.1	2;2;2;2;2;2;2	2;2;2;2;2;2;2	2;2;2;2;2;2;2	NP_001011926.1 AKT-interacting protein [Rattus norvegicus];XP_006255247.1 PREDICTED: AKT-interacting protein isoform X3 [Rattus norvegicus];XP_006255245.1 PREDICTED: AKT-interacting protein isoform X3 [Rattus norvegicus];XP_006255244.1 PREDICTED: AKT-inter	7	2	2	2	1	1	1	1	2	2	1	2	1	1	1	1	1	2	2	1	2	1	1	1	1	1	2	2	1	2	1	13.4	13.4	13.4	32.991	292	292;293;293;293;293;346;347	1	12	0.0002002	3.5561	7.5	7.5	7.5
NP_001011927.1	NP_001011927.1	8	8	8	NP_001011927.1 V-type proton ATPase subunit d 1 [Rattus norvegicus]	1	8	8	8	3	4	3	5	2	4	4	3	4	3	4	3	5	2	4	4	3	4	3	4	3	5	2	4	4	3	4	26.2	26.2	26.2	40.301	351	351	1	32	0	53.821	13.1	15.1	14.5
NP_001011929.1;XP_006233495.1;XP_006233493.1;XP_006233497.1;XP_017446171.1;XP_017446170.1	NP_001011929.1;XP_006233495.1;XP_006233493.1;XP_006233497.1;XP_017446171.1;XP_017446170.1	10;10;10;8;8;8	10;10;10;8;8;8	10;10;10;8;8;8	NP_001011929.1 endophilin-B1 [Rattus norvegicus];XP_006233495.1 PREDICTED: endophilin-B1 isoform X3 [Rattus norvegicus];XP_006233493.1 PREDICTED: endophilin-B1 isoform X1 [Rattus norvegicus];XP_006233497.1 PREDICTED: endophilin-B1 isoform X5 [Rattus norveg	6	10	10	10	7	6	7	7	6	9	8	8	9	7	6	7	7	6	9	8	8	9	7	6	7	7	6	9	8	8	9	34.2	34.2	34.2	40.787	365	365;386;402;330;367;392	1	88	0	147.14	26.8	26.8	29
NP_001011934.1;XP_017444473.1	NP_001011934.1;XP_017444473.1	7;7	7;7	7;7	NP_001011934.1 HBS1-like protein [Rattus norvegicus];XP_017444473.1 PREDICTED: HBS1-like protein isoform X1 [Rattus norvegicus]	2	7	7	7	2	2	2	2	2	3	1	5	3	2	2	2	2	2	3	1	5	3	2	2	2	2	2	3	1	5	3	17.1	17.1	17.1	74.773	679	679;681	1	30	0	39.278	4.6	4.9	4.9
NP_001011936.1	NP_001011936.1	14	14	14	NP_001011936.1 BAG family molecular chaperone regulator 3 [Rattus norvegicus]	1	14	14	14	9	9	8	4	7	6	5	9	6	9	9	8	4	7	6	5	9	6	9	9	8	4	7	6	5	9	6	35.4	35.4	35.4	61.49	574	574	1	82	0	146.44	26.8	20.4	21.3
NP_001011939.1	NP_001011939.1	34	34	19	NP_001011939.1 EH domain-containing protein 1 [Rattus norvegicus]	1	34	34	19	21	23	23	16	25	22	15	24	25	21	23	23	16	25	22	15	24	25	12	12	12	7	15	14	7	15	15	73.6	73.6	47.2	60.602	534	534	1	261	0	323.31	55.8	59.2	56.6
NP_001011946.1	NP_001011946.1	14	14	14	NP_001011946.1 beta-hexosaminidase subunit beta precursor [Rattus norvegicus]	1	14	14	14	8	9	11	7	11	12	7	9	9	8	9	11	7	11	12	7	9	9	8	9	11	7	11	12	7	9	9	28.7	28.7	28.7	61.527	537	537	1	103	0	85.703	19.4	14.7	24.4
NP_001011950.2;XP_006232673.1;XP_006232672.1	NP_001011950.2;XP_006232673.1;XP_006232672.1	6;4;4	6;4;4	6;4;4	NP_001011950.2 28S ribosomal protein S29, mitochondrial [Rattus norvegicus];XP_006232673.1 PREDICTED: 28S ribosomal protein S29, mitochondrial isoform X2 [Rattus norvegicus];XP_006232672.1 PREDICTED: 28S ribosomal protein S29, mitochondrial isoform X1 [Rat	3	6	6	6	3	5	6	2	4	4	2	5	3	3	5	6	2	4	4	2	5	3	3	5	6	2	4	4	2	5	3	19.9	19.9	19.9	45.111	396	396;323;366	1	41	0	72.391	11.4	17.2	19.9
NP_001011951.1	NP_001011951.1	5	5	5	NP_001011951.1 splicing factor 3B subunit 4 [Rattus norvegicus]	1	5	5	5	3	2	3	1	2	2	1	3	2	3	2	3	1	2	2	1	3	2	3	2	3	1	2	2	1	3	2	19.3	19.3	19.3	44.355	424	424	1	19	0	58.895	12	8	13.4
NP_001011953.1;XP_008759771.1	NP_001011953.1;XP_008759771.1	3;2	3;2	3;2	NP_001011953.1 GPI-anchor transamidase precursor [Rattus norvegicus];XP_008759771.1 PREDICTED: GPI-anchor transamidase isoform X1 [Rattus norvegicus]	2	3	3	3	1	1	2	0	1	0	1	2	2	1	1	2	0	1	0	1	2	2	1	1	2	0	1	0	1	2	2	9.6	9.6	9.6	44.893	395	395;357	1	10	0	5.3292	4.1	4.1	6.8
NP_001011959.2	NP_001011959.2	10	10	10	NP_001011959.2 lysosomal protective protein precursor [Rattus norvegicus]	1	10	10	10	7	7	7	5	6	6	5	6	5	7	7	7	5	6	6	5	6	5	7	7	7	5	6	6	5	6	5	22.1	22.1	22.1	55.769	493	493	1	80	0	85.946	19.1	16	16.4
NP_001011965.1	NP_001011965.1	5	5	5	NP_001011965.1 erythrocyte band 7 integral membrane protein [Rattus norvegicus]	1	5	5	5	5	3	4	2	3	4	3	3	3	5	3	4	2	3	4	3	3	3	5	3	4	2	3	4	3	3	3	27.5	27.5	27.5	31.378	284	284	1	33	0	47.698	27.5	15.8	22.5
NP_001011969.1;XP_003749912.2	NP_001011969.1;XP_003749912.2	14;11	14;11	14;11	NP_001011969.1 serine-threonine kinase receptor-associated protein [Rattus norvegicus];XP_003749912.2 PREDICTED: serine-threonine kinase receptor-associated protein-like [Rattus norvegicus]	2	14	14	14	9	12	9	7	12	12	8	12	9	9	12	9	7	12	12	8	12	9	9	12	9	7	12	12	8	12	9	49.7	49.7	49.7	38.456	350	350;279	1	132	0	196.55	37.1	44.3	41.4
NP_001011974.2;XP_006238248.1;XP_006238247.1;NP_001296189.1	NP_001011974.2;XP_006238248.1;XP_006238247.1;NP_001296189.1	13;12;12;12	13;12;12;12	13;12;12;12	NP_001011974.2 A-kinase anchor protein 2 isoform 2 [Rattus norvegicus];XP_006238248.1 PREDICTED: A-kinase anchor protein 2 isoform X1 [Rattus norvegicus];XP_006238247.1 PREDICTED: A-kinase anchor protein 2 isoform X1 [Rattus norvegicus];NP_001296189.1 A-ki	4	13	13	13	8	3	4	4	4	2	2	1	3	8	3	4	4	4	2	2	1	3	8	3	4	4	4	2	2	1	3	20.9	20.9	20.9	95.941	870	870;883;883;883	1	36	0	138.15	13.4	7.7	7.2
NP_001011975.1	NP_001011975.1	12	11	11	NP_001011975.1 aldehyde dehydrogenase X, mitochondrial precursor [Rattus norvegicus]	1	12	11	11	8	5	6	8	8	5	7	6	6	7	5	5	7	7	4	6	6	5	7	5	5	7	7	4	6	6	5	35.6	34.1	34.1	57.624	519	519	1	58	0	44.083	26.4	20	18.9
NP_001011981.1	NP_001011981.1	2	2	2	NP_001011981.1 sorting nexin-17 [Rattus norvegicus]	1	2	2	2	1	0	0	0	1	0	1	1	2	1	0	0	0	1	0	1	1	2	1	0	0	0	1	0	1	1	2	8.1	8.1	8.1	52.882	470	470	1	6	0	5.8386	4.5	0	0
NP_001011983.1	NP_001011983.1	9	9	9	NP_001011983.1 ubiquinone biosynthesis monooxygenase COQ6, mitochondrial precursor [Rattus norvegicus]	1	9	9	9	4	4	4	6	6	7	4	5	7	4	4	4	6	6	7	4	5	7	4	4	4	6	6	7	4	5	7	22.1	22.1	22.1	51.495	476	476	1	57	0	46.249	7.6	12.2	12.4
NP_001011988.1;XP_006241432.1;XP_017450230.1;XP_006241431.1;XP_006241429.1;XP_006241428.1;XP_006241427.1;XP_006241426.1;XP_006241425.1	NP_001011988.1;XP_006241432.1;XP_017450230.1;XP_006241431.1;XP_006241429.1;XP_006241428.1;XP_006241427.1;XP_006241426.1;XP_006241425.1	3;3;3;3;3;3;3;3;3	3;3;3;3;3;3;3;3;3	3;3;3;3;3;3;3;3;3	NP_001011988.1 CCR4-NOT transcription complex subunit 2 [Rattus norvegicus];XP_006241432.1 PREDICTED: CCR4-NOT transcription complex subunit 2 isoform X6 [Rattus norvegicus];XP_017450230.1 PREDICTED: CCR4-NOT transcription complex subunit 2 isoform X5 [Rat	9	3	3	3	0	1	1	1	0	1	1	2	2	0	1	1	1	0	1	1	2	2	0	1	1	1	0	1	1	2	2	14.7	14.7	14.7	47.086	429	429;455;499;509;531;531;531;540;550	1	9	0	5.7676	0	3.7	3.7
NP_001011989.1;XP_006241458.1;XP_003750373.1;XP_017458917.1	NP_001011989.1;XP_006241458.1;XP_003750373.1	5;5;5;2	5;5;5;2	5;5;5;2	NP_001011989.1 N-acetylglucosamine-6-sulfatase precursor [Rattus norvegicus];XP_006241458.1 PREDICTED: N-acetylglucosamine-6-sulfatase isoform X1 [Rattus norvegicus];XP_003750373.1 PREDICTED: N-acetylglucosamine-6-sulfatase isoform X1 [Rattus norvegicus]	4	5	5	5	3	3	1	0	3	2	1	4	3	3	3	1	0	3	2	1	4	3	3	3	1	0	3	2	1	4	3	10.6	10.6	10.6	57.765	519	519;544;544;439	1	20	0	15.418	6.6	6.6	1.7
NP_001011991.1	NP_001011991.1	8	8	8	NP_001011991.1 protein NDRG1 [Rattus norvegicus]	1	8	8	8	6	6	4	6	7	8	7	7	6	6	6	4	6	7	8	7	7	6	6	6	4	6	7	8	7	7	6	34.8	34.8	34.8	42.954	394	394	1	94	0	200.32	25.6	26.4	16.8
NP_001011993.1	NP_001011993.1	6	6	6	NP_001011993.1 pyrroline-5-carboxylate reductase 3 [Rattus norvegicus]	1	6	6	6	4	3	2	4	3	4	5	5	5	4	3	2	4	3	4	5	5	5	4	3	2	4	3	4	5	5	5	26.6	26.6	26.6	28.878	274	274	1	47	0	90.476	19.3	16.1	12.4
NP_001011996.1;XP_006242980.1;XP_006242981.1;XP_006242979.1;XP_008764378.1;XP_006242982.1;XP_008764379.1	NP_001011996.1;XP_006242980.1;XP_006242981.1;XP_006242979.1;XP_008764378.1;XP_006242982.1	4;4;3;3;2;2;1	4;4;3;3;2;2;1	4;4;3;3;2;2;1	NP_001011996.1 C2 domain-containing protein 2-like [Rattus norvegicus];XP_006242980.1 PREDICTED: C2 domain-containing protein 2-like isoform X2 [Rattus norvegicus];XP_006242981.1 PREDICTED: C2 domain-containing protein 2-like isoform X3 [Rattus norvegicus]	7	4	4	4	2	1	1	1	3	1	0	1	2	2	1	1	1	3	1	0	1	2	2	1	1	1	3	1	0	1	2	9.3	9.3	9.3	76.06	706	706;707;707;708;653;664;643	1	13	0	5.817	4.4	1.4	1.4
NP_001011997.1	NP_001011997.1	15	15	14	NP_001011997.1 tropomodulin-3 [Rattus norvegicus]	1	15	15	14	11	11	11	6	8	9	8	9	9	11	11	11	6	8	9	8	9	9	10	11	10	6	8	9	7	9	9	50.6	50.6	48.3	39.471	352	352	1	122	0	236.78	40.9	39.2	39.2
NP_001011999.1;XP_017451068.1;XP_008764667.1	NP_001011999.1;XP_017451068.1;XP_008764667.1	1;1;1	1;1;1	1;1;1	NP_001011999.1 mortality factor 4-like protein 1 [Rattus norvegicus];XP_017451068.1 PREDICTED: mortality factor 4-like protein 1 isoform X2 [Rattus norvegicus];XP_008764667.1 PREDICTED: mortality factor 4-like protein 1 isoform X1 [Rattus norvegicus]	3	1	1	1	0	0	0	0	0	0	0	0	1	0	0	0	0	0	0	0	0	1	0	0	0	0	0	0	0	0	1	6.2	6.2	6.2	37.2	323	323;361;362	1	1	0.0096642	0.92452	0	0	0
NP_001012000.1	NP_001012000.1	1	1	1	NP_001012000.1 phospholipid scramblase 4 [Rattus norvegicus]	1	1	1	1	0	1	0	0	0	0	0	0	0	0	1	0	0	0	0	0	0	0	0	1	0	0	0	0	0	0	0	6.1	6.1	6.1	36.328	326	326	1	1	0.0060261	1.1808	0	6.1	0
NP_001012005.2	NP_001012005.2	18	17	17	NP_001012005.2 nidogen-2 precursor [Rattus norvegicus]	1	18	17	17	11	7	7	5	6	4	10	4	5	10	7	7	5	6	4	10	4	5	10	7	7	5	6	4	10	4	5	19.3	18.6	18.6	152.97	1396	1396	1	63	0	133.5	12.6	8.2	8
NP_001012022.1	NP_001012022.1	2	2	2	NP_001012022.1 claudin-4 [Rattus norvegicus]	1	2	2	2	0	1	1	1	1	0	0	0	1	0	1	1	1	1	0	0	0	1	0	1	1	1	1	0	0	0	1	13.3	13.3	13.3	22.432	210	210	1	6	0	10.427	0	7.6	7.6
NP_001012025.1;XP_006249761.1	NP_001012025.1;XP_006249761.1	4;4	4;4	4;4	NP_001012025.1 UBX domain-containing protein 4 [Rattus norvegicus];XP_006249761.1 PREDICTED: UBX domain-containing protein 4 isoform X1 [Rattus norvegicus]	2	4	4	4	2	2	1	2	2	3	2	3	2	2	2	1	2	2	3	2	3	2	2	2	1	2	2	3	2	3	2	12.1	12.1	12.1	56.393	506	506;507	1	25	0	79.686	5.5	7.3	4.2
NP_001012027.1;CON__P41361	NP_001012027.1	24;6	24;6	24;6	NP_001012027.1 antithrombin-III precursor [Rattus norvegicus]	2	24	24	24	16	14	14	12	13	13	13	12	16	16	14	14	12	13	13	13	12	16	16	14	14	12	13	13	13	12	16	42.8	42.8	42.8	52.233	465	465;465	1	160	0	280.35	34.6	32	30.3
NP_001012029.1	NP_001012029.1	8	8	8	NP_001012029.1 myeloid cell nuclear differentiation antigen [Rattus norvegicus]	1	8	8	8	4	1	4	1	2	5	1	3	4	4	1	4	1	2	5	1	3	4	4	1	4	1	2	5	1	3	4	27.2	27.2	27.2	49.734	438	438	1	33	0	59.038	13.9	3.2	14.6
NP_001012036.1	NP_001012036.1	1	1	1	NP_001012036.1 something about silencing protein 10 [Rattus norvegicus]	1	1	1	1	1	0	1	0	0	0	0	1	1	1	0	1	0	0	0	0	1	1	1	0	1	0	0	0	0	1	1	3.6	3.6	3.6	53.923	470	470	1	4	0	10.569	3.6	0	3.6
NP_001012063.1	NP_001012063.1	13	13	13	NP_001012063.1 SUMO-activating enzyme subunit 1 [Rattus norvegicus]	1	13	13	13	5	7	8	7	7	6	6	7	7	5	7	8	7	7	6	6	7	7	5	7	8	7	7	6	6	7	7	48.4	48.4	48.4	38.512	349	349	1	80	0	296.33	28.4	29.8	35
NP_001012064.1;XP_006228483.1	NP_001012064.1;XP_006228483.1	8;7	8;7	8;7	NP_001012064.1 nectin-2 precursor [Rattus norvegicus];XP_006228483.1 PREDICTED: nectin-2 isoform X1 [Rattus norvegicus]	2	8	8	8	4	3	4	5	3	3	4	1	3	4	3	4	5	3	3	4	1	3	4	3	4	5	3	3	4	1	3	29.8	29.8	29.8	57.323	530	530;467	1	37	0	113.97	17	12.5	16
NP_001012067.1	NP_001012067.1	2	2	2	NP_001012067.1 glutamate-rich WD repeat-containing protein 1 [Rattus norvegicus]	1	2	2	2	1	1	1	1	0	0	2	0	0	1	1	1	1	0	0	2	0	0	1	1	1	1	0	0	2	0	0	7.2	7.2	7.2	49.168	445	445	1	8	0	15.666	3.6	3.6	3.6
NP_001012068.1;XP_017444718.1;XP_008758113.1;XP_008758112.1	NP_001012068.1;XP_017444718.1;XP_008758113.1;XP_008758112.1	1;1;1;1	1;1;1;1	1;1;1;1	NP_001012068.1 uroporphyrinogen-III synthase [Rattus norvegicus];XP_017444718.1 PREDICTED: uroporphyrinogen-III synthase isoform X1 [Rattus norvegicus];XP_008758113.1 PREDICTED: uroporphyrinogen-III synthase isoform X1 [Rattus norvegicus];XP_008758112.1 PR	4	1	1	1	0	0	0	1	1	1	1	0	0	0	0	0	1	1	1	1	0	0	0	0	0	1	1	1	1	0	0	5.7	5.7	5.7	28.438	265	265;273;273;273	1	4	0	4.801	0	0	0
NP_001012082.1	NP_001012082.1	2	2	2	NP_001012082.1 UDP-N-acetylglucosamine transporter [Rattus norvegicus]	1	2	2	2	1	1	1	2	1	1	1	1	1	1	1	1	2	1	1	1	1	1	1	1	1	2	1	1	1	1	1	8.9	8.9	8.9	36.078	326	326	1	16	0	54.507	4.6	4.6	4.6
NP_001012085.1	NP_001012085.1	7	7	6	NP_001012085.1 signal transducing adapter molecule 2 [Rattus norvegicus]	1	7	7	6	0	1	2	1	2	3	2	5	3	0	1	2	1	2	3	2	5	3	0	1	2	0	1	2	1	4	2	21.4	21.4	19.5	57.159	523	523	1	26	0	56.75	0	1.9	6.1
NP_001012104.1	NP_001012104.1	15	15	15	NP_001012104.1 dolichyl-diphosphooligosaccharide--protein glycosyltransferase 48 kDa subunit precursor [Rattus norvegicus]	1	15	15	15	13	14	14	13	14	13	12	14	13	13	14	14	13	14	13	12	14	13	13	14	14	13	14	13	12	14	13	52.8	52.8	52.8	48.895	441	441	1	195	0	323.31	50.6	52.4	52.4
NP_001012134.1	NP_001012134.1	9	9	9	NP_001012134.1 UDP-GlcNAc:betaGal beta-1,3-N-acetylglucosaminyltransferase 7 [Rattus norvegicus]	1	9	9	9	7	8	7	6	7	8	5	8	6	7	8	7	6	7	8	5	8	6	7	8	7	6	7	8	5	8	6	30.5	30.5	30.5	45.446	397	397	1	89	0	124.42	25.4	27.5	25.4
NP_001012139.1;XP_008766061.1;XP_008766060.1	NP_001012139.1;XP_008766061.1;XP_008766060.1	2;2;2	2;2;2	2;2;2	NP_001012139.1 phospholipid scramblase 3 [Rattus norvegicus];XP_008766061.1 PREDICTED: phospholipid scramblase 3 isoform X1 [Rattus norvegicus];XP_008766060.1 PREDICTED: phospholipid scramblase 3 isoform X1 [Rattus norvegicus]	3	2	2	2	1	1	0	0	0	0	0	0	0	1	1	0	0	0	0	0	0	0	1	1	0	0	0	0	0	0	0	8.1	8.1	8.1	31.646	296	296;383;383	1	2	0.00019301	2.9508	4.4	3.7	0
NP_001012140.1	NP_001012140.1	2	2	2	NP_001012140.1 ras-related protein Rab-34 [Rattus norvegicus]	1	2	2	2	0	0	1	0	0	1	0	0	0	0	0	1	0	0	1	0	0	0	0	0	1	0	0	1	0	0	0	8.9	8.9	8.9	29.102	259	259	1	2	0.0050352	1.2149	0	0	3.1
NP_001012148.1;XP_006249523.2;XP_006249524.1;XP_006230904.1;NP_001101984.1	NP_001012148.1;XP_006249523.2;XP_006249524.1	14;14;12;1;1	14;14;12;1;1	14;14;12;1;1	NP_001012148.1 ankyrin repeat domain-containing protein 13A [Rattus norvegicus];XP_006249523.2 PREDICTED: ankyrin repeat domain-containing protein 13A isoform X1 [Rattus norvegicus];XP_006249524.1 PREDICTED: ankyrin repeat domain-containing protein 13A iso	5	14	14	14	7	5	7	4	6	8	3	4	6	7	5	7	4	6	8	3	4	6	7	5	7	4	6	8	3	4	6	32.9	32.9	32.9	67.319	589	589;590;577;540;605	1	53	0	33.996	17.8	11	14.9
NP_001012150.1;XP_006250463.1;XP_006250462.1;XP_017454346.1;XP_017454345.1;XP_006250455.1;XP_017454343.1;XP_017454344.1;XP_017454342.1;XP_017454351.1;XP_017454350.1;XP_017454349.1;XP_017454348.1;XP_017454347.1	NP_001012150.1;XP_006250463.1;XP_006250462.1;XP_017454346.1;XP_017454345.1;XP_006250455.1;XP_017454343.1;XP_017454344.1;XP_017454342.1;XP_017454351.1;XP_017454350.1;XP_017454349.1;XP_017454348.1;XP_017454347.1	16;16;16;16;16;16;16;15;15;14;14;11;11;11	16;16;16;16;16;16;16;15;15;14;14;11;11;11	16;16;16;16;16;16;16;15;15;14;14;11;11;11	NP_001012150.1 protein enabled homolog [Rattus norvegicus];XP_006250463.1 PREDICTED: protein enabled homolog isoform X12 [Rattus norvegicus];XP_006250462.1 PREDICTED: protein enabled homolog isoform X11 [Rattus norvegicus];XP_017454346.1 PREDICTED: protein	14	16	16	16	12	11	9	6	8	7	5	5	7	12	11	9	6	8	7	5	5	7	12	11	9	6	8	7	5	5	7	37.3	37.3	37.3	58.827	526	526;589;610;805;825;830;851;828;853;815;815;683;730;734	1	98	0	158.6	30.8	33.1	28.5
NP_001012151.1	NP_001012151.1	5	5	5	NP_001012151.1 syntaxin-18 [Rattus norvegicus]	1	5	5	5	1	1	1	1	2	4	0	2	0	1	1	1	1	2	4	0	2	0	1	1	1	1	2	4	0	2	0	16.8	16.8	16.8	38.512	334	334	1	12	0	9.7432	3.6	3.9	3.9
NP_001012153.1;XP_006251401.1;XP_006251400.1	NP_001012153.1;XP_006251401.1;XP_006251400.1	10;10;10	10;10;10	10;10;10	NP_001012153.1 THO complex subunit 5 homolog [Rattus norvegicus];XP_006251401.1 PREDICTED: THO complex subunit 5 homolog isoform X2 [Rattus norvegicus];XP_006251400.1 PREDICTED: THO complex subunit 5 homolog isoform X1 [Rattus norvegicus]	3	10	10	10	4	1	1	5	4	4	5	3	6	4	1	1	5	4	4	5	3	6	4	1	1	5	4	4	5	3	6	19.4	19.4	19.4	78.659	682	682;683;694	1	35	0	15.464	8.2	1	1.5
NP_001012155.1;XP_008768910.1	NP_001012155.1;XP_008768910.1	7;7	7;7	7;7	NP_001012155.1 transmembrane 9 superfamily member 1 precursor [Rattus norvegicus];XP_008768910.1 PREDICTED: transmembrane 9 superfamily member 1 isoform X1 [Rattus norvegicus]	2	7	7	7	4	3	3	3	4	5	3	4	5	4	3	3	3	4	5	3	4	5	4	3	3	3	4	5	3	4	5	13.2	13.2	13.2	66.918	589	589;606	1	36	0	13.278	7.5	5.9	5.9
NP_001012157.1;XP_006252385.1	NP_001012157.1;XP_006252385.1	16;15	16;15	16;15	NP_001012157.1 conserved oligomeric Golgi complex subunit 3 [Rattus norvegicus];XP_006252385.1 PREDICTED: conserved oligomeric Golgi complex subunit 3 isoform X1 [Rattus norvegicus]	2	16	16	16	4	6	6	9	6	8	9	3	9	4	6	6	9	6	8	9	3	9	4	6	6	9	6	8	9	3	9	21.7	21.7	21.7	94.246	828	828;930	1	65	0	72.239	6.5	10.6	10.4
NP_001012161.1;XP_017456103.1;XP_008769958.1;XP_006254077.1	NP_001012161.1;XP_017456103.1;XP_008769958.1;XP_006254077.1	4;4;4;4	4;4;4;4	4;4;4;4	NP_001012161.1 tubulin-specific chaperone E [Rattus norvegicus];XP_017456103.1 PREDICTED: tubulin-specific chaperone E isoform X1 [Rattus norvegicus];XP_008769958.1 PREDICTED: tubulin-specific chaperone E isoform X1 [Rattus norvegicus];XP_006254077.1 PREDI	4	4	4	4	1	2	2	2	1	2	2	2	3	1	2	2	2	1	2	2	2	3	1	2	2	2	1	2	2	2	3	9.5	9.5	9.5	59.042	524	524;535;535;535	1	18	0	12.257	2.7	4.8	4.8
NP_001012165.1	NP_001012165.1	4	4	4	NP_001012165.1 ER membrane protein complex subunit 8 [Rattus norvegicus]	1	4	4	4	3	2	1	3	3	2	2	3	2	3	2	1	3	3	2	2	3	2	3	2	1	3	3	2	2	3	2	25.1	25.1	25.1	23.405	207	207	1	25	0	18.798	20.3	15.9	8.2
NP_001012166.1	NP_001012166.1	9	9	9	NP_001012166.1 ATP-binding cassette sub-family B member 10, mitochondrial [Rattus norvegicus]	1	9	9	9	0	2	5	0	2	3	2	2	3	0	2	5	0	2	3	2	2	3	0	2	5	0	2	3	2	2	3	16.8	16.8	16.8	77.393	715	715	1	20	0	14.45	0	2.9	11.6
NP_001012175.1;XP_008771044.1	NP_001012175.1;XP_008771044.1	1;1	1;1	1;1	NP_001012175.1 AN1-type zinc finger protein 3 [Rattus norvegicus];XP_008771044.1 PREDICTED: AN1-type zinc finger protein 3 isoform X1 [Rattus norvegicus]	2	1	1	1	0	0	0	0	1	1	0	1	1	0	0	0	0	1	1	0	1	1	0	0	0	0	1	1	0	1	1	5.7	5.7	5.7	25.082	227	227;232	1	4	0.00037306	2.5435	0	0	0
NP_001012177.1;XP_008758900.2	NP_001012177.1;XP_008758900.2	21;20	21;20	21;20	NP_001012177.1 methylcrotonoyl-CoA carboxylase beta chain, mitochondrial [Rattus norvegicus];XP_008758900.2 PREDICTED: methylcrotonoyl-CoA carboxylase beta chain, mitochondrial isoform X1 [Rattus norvegicus]	2	21	21	21	11	17	16	11	14	15	11	14	16	11	17	16	11	14	15	11	14	16	11	17	16	11	14	15	11	14	16	51.9	51.9	51.9	61.516	563	563;525	1	153	0	259.46	32.5	44.8	44.2
NP_001012179.1;XP_017446727.1;XP_017446726.1;XP_017444097.1;XP_017446725.1	NP_001012179.1;XP_017446727.1;XP_017446726.1;XP_017444097.1;XP_017446725.1	13;12;12;12;12	13;12;12;12;12	1;0;0;0;0	NP_001012179.1 fragile X mental retardation syndrome-related protein 1 [Rattus norvegicus];XP_017446727.1 PREDICTED: fragile X mental retardation syndrome-related protein 1 isoform X5 [Rattus norvegicus];XP_017446726.1 PREDICTED: fragile X mental retardati	5	13	13	1	9	7	6	5	6	6	4	5	5	9	7	6	5	6	6	4	5	5	1	1	0	0	0	1	0	0	0	27.6	27.6	2.8	63.947	568	568;539;539;539;566	1	57	0	78.06	22.4	17.6	13.7
NP_001012185.2;XP_006234714.1	NP_001012185.2;XP_006234714.1	10;7	10;7	10;7	NP_001012185.2 caprin-1 [Rattus norvegicus];XP_006234714.1 PREDICTED: caprin-1 isoform X1 [Rattus norvegicus]	2	10	10	10	9	7	8	6	9	10	8	8	9	9	7	8	6	9	10	8	8	9	9	7	8	6	9	10	8	8	9	20.1	20.1	20.1	78.12	707	707;628	1	92	0	183.28	19.9	17.8	18.8
NP_001012192.1	NP_001012192.1	3	3	3	NP_001012192.1 EARP-interacting protein [Rattus norvegicus]	1	3	3	3	0	0	0	3	2	2	0	1	0	0	0	0	3	2	2	0	1	0	0	0	0	3	2	2	0	1	0	13	13	13	43.156	386	386	1	8	0	28.184	0	0	0
NP_001012193.1	NP_001012193.1	5	5	5	NP_001012193.1 retinol dehydrogenase 11 precursor [Rattus norvegicus]	1	5	5	5	1	3	3	2	1	1	2	2	1	1	3	3	2	1	1	2	2	1	1	3	3	2	1	1	2	2	1	22.5	22.5	22.5	35.121	316	316	1	17	0	58.639	4.1	15.8	15.8
NP_001012197.2	NP_001012197.2	45	43	43	NP_001012197.2 endoplasmin precursor [Rattus norvegicus]	1	45	43	43	32	30	29	31	31	30	28	33	33	30	28	27	29	29	28	26	31	31	30	28	27	29	29	28	26	31	31	48	46.3	46.3	92.77	804	804	1	488	0	323.31	41.7	40.7	39.3
NP_001012208.1	NP_001012208.1	8	8	7	NP_001012208.1 pyrroline-5-carboxylate reductase 2 [Rattus norvegicus]	1	8	8	7	2	3	2	4	5	3	4	3	3	2	3	2	4	5	3	4	3	3	1	2	1	3	4	2	3	2	2	33.1	33.1	29.7	33.673	320	320	1	31	0	21.522	8.8	12.5	8.8
NP_001012214.1	NP_001012214.1	4	3	3	NP_001012214.1 serine (or cysteine) peptidase inhibitor, clade B, member 6b [Rattus norvegicus]	1	4	3	3	0	1	1	1	0	1	1	2	2	0	1	1	1	0	0	1	1	1	0	1	1	1	0	0	1	1	1	14.3	12.2	12.2	42.789	377	377	1	6	0	4.0714	0	2.4	4.5
NP_001012217.1	NP_001012217.1	2	2	2	NP_001012217.1 protein phosphatase Slingshot homolog 3 [Rattus norvegicus]	1	2	2	2	0	1	1	0	1	0	0	0	0	0	1	1	0	1	0	0	0	0	0	1	1	0	1	0	0	0	0	3.8	3.8	3.8	72.07	652	652	1	3	0	6.6961	0	1.8	1.8
NP_001012222.1;XP_006241230.1;XP_006241229.1;XP_006241228.1	NP_001012222.1	3;1;1;1	3;1;1;1	3;1;1;1	NP_001012222.1 F-box only protein 7 [Rattus norvegicus]	4	3	3	3	2	2	1	3	1	2	2	2	2	2	2	1	3	1	2	2	2	2	2	2	1	3	1	2	2	2	2	8.8	8.8	8.8	57.56	522	522;441;441;443	1	20	0	29.789	6.7	6.7	3.4
NP_001012223.1;XP_008763995.1	NP_001012223.1;XP_008763995.1	9;8	8;7	8;7	NP_001012223.1 bridging integrator 2 [Rattus norvegicus];XP_008763995.1 PREDICTED: bridging integrator 2 isoform X1 [Rattus norvegicus]	2	9	8	8	5	0	1	1	1	1	5	2	1	5	0	1	1	1	1	4	2	1	5	0	1	1	1	1	4	2	1	27.4	25.8	25.8	55.118	507	507;434	1	17	0	12.33	17.6	0	3.4
NP_001012356.1	NP_001012356.1	13	12	12	NP_001012356.1 non-POU domain-containing octamer-binding protein [Rattus norvegicus]	1	13	12	12	5	6	5	8	5	8	8	7	7	4	5	4	7	4	7	7	6	6	4	5	4	7	4	7	7	6	6	35.9	34.2	34.2	54.925	476	476	1	68	0	89.55	15.3	17	12.2
NP_001012480.1	NP_001012480.1	6	6	6	NP_001012480.1 ATP-dependent RNA helicase SUPV3L1, mitochondrial precursor [Rattus norvegicus]	1	6	6	6	1	1	1	0	1	1	1	0	1	1	1	1	0	1	1	1	0	1	1	1	1	0	1	1	1	0	1	9.7	9.7	9.7	86.705	776	776	1	7	0	11.694	1.8	2.1	1.7
NP_001012486.1	NP_001012486.1	10	10	10	NP_001012486.1 ras-related protein Rab-18 [Rattus norvegicus]	1	10	10	10	5	3	6	3	7	6	4	4	7	5	3	6	3	7	6	4	4	7	5	3	6	3	7	6	4	4	7	53.4	53.4	53.4	22.976	206	206	1	46	0	82.215	27.7	21.8	30.1
NP_001012488.1	NP_001012488.1	3	3	3	NP_001012488.1 interferon regulatory factor 2-binding protein-like [Rattus norvegicus]	1	3	3	3	1	1	0	2	0	1	1	1	2	1	1	0	2	0	1	1	1	2	1	1	0	2	0	1	1	1	2	6.3	6.3	6.3	81.495	783	783	1	9	0	6.8073	1.4	1.4	0
NP_001012491.1	NP_001012491.1	7	7	7	NP_001012491.1 DNA-directed RNA polymerase II subunit RPB3 [Rattus norvegicus]	1	7	7	7	2	1	2	4	3	3	2	3	3	2	1	2	4	3	3	2	3	3	2	1	2	4	3	3	2	3	3	40	40	40	31.443	275	275	1	23	0	38.764	12.4	6.5	13.8
NP_001012522.1;NP_001041326.1;XP_008769057.1;XP_008768107.1;XP_006224738.1;NP_001041357.1;NP_919334.1;XP_218493.2;XP_001079451.1	NP_001012522.1;NP_001041326.1	12;9;5;5;3;3;2;1;1	12;9;5;5;3;3;2;1;1	12;9;5;5;3;3;2;1;1	NP_001012522.1 protein SET [Rattus norvegicus];NP_001041326.1 serine/threonine-protein kinase N3 [Rattus norvegicus]	9	12	12	12	10	7	8	6	7	5	6	7	7	10	7	8	6	7	5	6	7	7	10	7	8	6	7	5	6	7	7	39.4	39.4	39.4	33.381	289	289;959;213;213;212;521;285;273;273	1	89	0	298.25	31.8	20.8	31.8
NP_001013053.1	NP_001013053.1	16	16	16	NP_001013053.1 prohibitin-2 [Rattus norvegicus]	1	16	16	16	10	11	12	13	14	13	12	13	9	10	11	12	13	14	13	12	13	9	10	11	12	13	14	13	12	13	9	60.5	60.5	60.5	33.312	299	299	1	154	0	238.69	43.1	45.5	48.8
NP_001013060.1;XP_017452637.1;XP_006247732.1;XP_006247730.1;XP_006247727.1;XP_006247726.1;XP_006247725.1	NP_001013060.1;XP_017452637.1;XP_006247732.1;XP_006247730.1;XP_006247727.1;XP_006247726.1;XP_006247725.1	2;2;2;2;2;2;2	2;2;2;2;2;2;2	2;2;2;2;2;2;2	NP_001013060.1 zinc transporter ZIP11 [Rattus norvegicus];XP_017452637.1 PREDICTED: zinc transporter ZIP11 isoform X4 [Rattus norvegicus];XP_006247732.1 PREDICTED: zinc transporter ZIP11 isoform X4 [Rattus norvegicus];XP_006247730.1 PREDICTED: zinc transpo	7	2	2	2	1	2	1	0	2	2	1	0	1	1	2	1	0	2	2	1	0	1	1	2	1	0	2	2	1	0	1	10.7	10.7	10.7	34.868	335	335;342;342;342;373;374;380	1	14	0	5.9033	6.6	10.7	6.6
NP_001013064.1;XP_008767443.1	NP_001013064.1;XP_008767443.1	4;2	4;2	4;2	NP_001013064.1 ras-related protein Rab-35 [Rattus norvegicus];XP_008767443.1 PREDICTED: ras-related protein Rab-35 isoform X1 [Rattus norvegicus]	2	4	4	4	2	0	1	1	1	1	1	2	2	2	0	1	1	1	1	1	2	2	2	0	1	1	1	1	1	2	2	19.4	19.4	19.4	23.025	201	201;152	1	15	0	6.6062	11.9	0	7.5
NP_001013065.1;XP_008762706.1;XP_008762705.1	NP_001013065.1;XP_008762706.1;XP_008762705.1	2;2;2	2;2;2	2;2;2	NP_001013065.1 myotubularin [Rattus norvegicus];XP_008762706.1 PREDICTED: myotubularin isoform X2 [Rattus norvegicus];XP_008762705.1 PREDICTED: myotubularin isoform X1 [Rattus norvegicus]	3	2	2	2	1	0	1	0	0	0	0	0	1	1	0	1	0	0	0	0	0	1	1	0	1	0	0	0	0	0	1	4.9	4.9	4.9	63.794	553	553;623;624	1	3	0.00018965	2.7288	3.4	0	1.4
NP_001013066.1	NP_001013066.1	3	3	3	NP_001013066.1 insulin-like growth factor-binding protein 7 precursor [Rattus norvegicus]	1	3	3	3	2	2	0	1	1	2	0	1	0	2	2	0	1	1	2	0	1	0	2	2	0	1	1	2	0	1	0	10.7	10.7	10.7	28.912	281	281	1	9	0.00054975	2.2983	10.3	10.3	0
NP_001013067.2;XP_006251257.1;XP_006251256.1;XP_017454609.1;XP_006251258.1;XP_008768481.1;XP_008768597.1;XP_008768598.1	NP_001013067.2;XP_006251257.1;XP_006251256.1;XP_017454609.1;XP_006251258.1;XP_008768481.1	33;32;32;31;31;30;2;1	33;32;32;31;31;30;2;1	33;32;32;31;31;30;2;1	NP_001013067.2 smoothelin [Rattus norvegicus];XP_006251257.1 PREDICTED: smoothelin isoform X1 [Rattus norvegicus];XP_006251256.1 PREDICTED: smoothelin isoform X1 [Rattus norvegicus];XP_017454609.1 PREDICTED: smoothelin isoform X3 [Rattus norvegicus];XP_006	8	33	33	33	23	17	18	19	20	17	16	21	20	23	17	18	19	20	17	16	21	20	23	17	18	19	20	17	16	21	20	41	41	41	99.878	921	921;923;923;917;922;954;119;118	1	237	0	323.31	31.8	25.3	28.3
NP_001013068.1	NP_001013068.1	4	4	4	NP_001013068.1 DNA polymerase delta subunit 2 [Rattus norvegicus]	1	4	4	4	0	0	1	1	0	0	2	3	0	0	0	1	1	0	0	2	3	0	0	0	1	1	0	0	2	3	0	12.6	12.6	12.6	51.346	469	469	1	7	0	6.7798	0	0	3
NP_001013069.1	NP_001013069.1	9	9	9	NP_001013069.1 protein SGT1 homolog [Rattus norvegicus]	1	9	9	9	5	5	4	6	6	6	5	6	5	5	5	4	6	6	6	5	6	5	5	5	4	6	6	6	5	6	5	39.9	39.9	39.9	38.09	336	336	1	56	0	117.79	24.1	23.8	20.8
NP_001013079.1	NP_001013079.1	10	10	10	NP_001013079.1 adenine phosphoribosyltransferase [Rattus norvegicus]	1	10	10	10	10	6	6	8	6	6	6	5	7	10	6	6	8	6	6	6	5	7	10	6	6	8	6	6	6	5	7	42.2	42.2	42.2	19.546	180	180	1	86	0	128.52	42.2	38.3	30
NP_001013080.1;CON__Q28194	NP_001013080.1	12;4	12;4	12;4	NP_001013080.1 thrombospondin-1 precursor [Rattus norvegicus]	2	12	12	12	8	5	5	4	1	3	2	3	1	8	5	5	4	1	3	2	3	1	8	5	5	4	1	3	2	3	1	14.4	14.4	14.4	129.67	1170	1170;1170	1	36	0	45.675	8.4	6.8	7.4
NP_001013086.1	NP_001013086.1	5	5	5	NP_001013086.1 39S ribosomal protein L46, mitochondrial [Rattus norvegicus]	1	5	5	5	1	2	2	1	2	2	1	2	3	1	2	2	1	2	2	1	2	3	1	2	2	1	2	2	1	2	3	22.7	22.7	22.7	31.673	277	277	1	16	0	10.297	2.5	7.2	7.2
NP_001013087.1;XP_006229912.1	NP_001013087.1;XP_006229912.1	9;8	9;8	9;8	NP_001013087.1 PCTP-like protein [Rattus norvegicus];XP_006229912.1 PREDICTED: PCTP-like protein isoform X1 [Rattus norvegicus]	2	9	9	9	7	8	4	3	6	6	6	5	7	7	8	4	3	6	6	6	5	7	7	8	4	3	6	6	6	5	7	41.4	41.4	41.4	32.904	290	290;363	1	65	0	90.819	29.7	35.5	18.6
NP_001013089.1	NP_001013089.1	1	1	1	NP_001013089.1 delta(14)-sterol reductase [Rattus norvegicus]	1	1	1	1	0	0	0	0	1	0	0	0	0	0	0	0	0	1	0	0	0	0	0	0	0	0	1	0	0	0	0	4.5	4.5	4.5	46.444	418	418	1	1	0.0017486	1.6567	0	0	0
NP_001013090.1;XP_017457940.1;XP_017457939.1	NP_001013090.1;XP_017457940.1;XP_017457939.1	1;1;1	1;1;1	1;1;1	NP_001013090.1 sideroflexin-2 [Rattus norvegicus];XP_017457940.1 PREDICTED: sideroflexin-2-like isoform X2 [Rattus norvegicus];XP_017457939.1 PREDICTED: sideroflexin-2-like isoform X1 [Rattus norvegicus]	3	1	1	1	0	0	1	0	0	1	0	1	0	0	0	1	0	0	1	0	1	0	0	0	1	0	0	1	0	1	0	9	9	9	16.551	144	144;176;198	1	3	0.0032396	1.3818	0	0	9
NP_001013100.1	NP_001013100.1	8	8	8	NP_001013100.1 serum paraoxonase/arylesterase 2 [Rattus norvegicus]	1	8	8	8	3	6	6	3	5	6	5	7	3	3	6	6	3	5	6	5	7	3	3	6	6	3	5	6	5	7	3	36.4	36.4	36.4	39.617	354	354	1	57	0	26.638	14.1	29.4	23.7
NP_001013102.1;XP_008761083.1;XP_006236312.1;XP_008760978.1;XP_008760977.1	NP_001013102.1;XP_008761083.1;XP_006236312.1;XP_008760978.1;XP_008760977.1	5;5;4;4;4	1;1;0;0;0	1;1;0;0;0	NP_001013102.1 aldo-keto reductase family 1 member B10 [Rattus norvegicus];XP_008761083.1 PREDICTED: aldose reductase-related protein 1-like [Rattus norvegicus];XP_006236312.1 PREDICTED: aldose reductase-related protein 1 isoform X3 [Rattus norvegicus];XP_	5	5	1	1	4	3	2	4	2	2	2	3	2	0	1	1	0	0	0	0	1	0	0	1	1	0	0	0	0	1	0	21.8	9.5	9.5	35.998	316	316;423;305;314;324	1	3	0.00054635	2.2195	12.3	16.8	12.3
NP_001013107.1;XP_006238095.1;XP_017448727.1;XP_017448726.1;XP_008761837.1	NP_001013107.1;XP_006238095.1;XP_017448727.1;XP_017448726.1;XP_008761837.1	6;4;3;3;3	6;4;3;3;3	6;4;3;3;3	NP_001013107.1 galactose-1-phosphate uridylyltransferase [Rattus norvegicus];XP_006238095.1 PREDICTED: galactose-1-phosphate uridylyltransferase isoform X1 [Rattus norvegicus];XP_017448727.1 PREDICTED: galactose-1-phosphate uridylyltransferase isoform X4 [	5	6	6	6	2	3	1	2	3	2	2	2	2	2	3	1	2	3	2	2	2	2	2	3	1	2	3	2	2	2	2	18.2	18.2	18.2	43.314	379	379;331;203;251;291	1	20	0	10.908	7.1	11.1	4
NP_001013109.2	NP_001013109.2	7	7	7	NP_001013109.2 non-lysosomal glucosylceramidase [Rattus norvegicus]	1	7	7	7	0	3	4	1	4	2	0	3	6	0	3	4	1	4	2	0	3	6	0	3	4	1	4	2	0	3	6	9.8	9.8	9.8	101.82	904	904	1	23	0	10.153	0	3.4	5.3
NP_001013113.1	NP_001013113.1	8	8	8	NP_001013113.1 eukaryotic translation initiation factor 3 subunit G [Rattus norvegicus]	1	8	8	8	4	6	4	4	5	6	4	5	5	4	6	4	4	5	6	4	5	5	4	6	4	4	5	6	4	5	5	36.6	36.6	36.6	35.651	320	320	1	49	0	84.387	12.8	29.7	17.8
NP_001013126.2	NP_001013126.2	6	6	6	NP_001013126.2 E3 ubiquitin-protein ligase ARIH1 [Rattus norvegicus]	1	6	6	6	1	0	1	1	3	5	3	2	5	1	0	1	1	3	5	3	2	5	1	0	1	1	3	5	3	2	5	13.5	13.5	13.5	64.016	555	555	1	26	0	41.573	2.5	0	2.2
NP_001013128.1;NP_775443.1;CON__Q29443;CON__Q0IIK2	NP_001013128.1	23;1;1;1	23;1;1;1	21;1;1;1	NP_001013128.1 serotransferrin precursor [Rattus norvegicus]	4	23	23	21	21	19	14	20	21	20	20	16	16	21	19	14	20	21	20	20	16	16	19	18	14	18	19	18	18	15	15	29.1	29.1	26.6	76.394	698	698;216;685;704	1	311	0	323.31	27.2	26.8	21.5
NP_001013129.1	NP_001013129.1	1	1	1	NP_001013129.1 tyrosine-protein phosphatase non-receptor type 18 [Rattus norvegicus]	1	1	1	1	0	0	0	0	0	1	0	0	0	0	0	0	0	0	1	0	0	0	0	0	0	0	0	1	0	0	0	4.2	4.2	4.2	50.106	453	453	1	1	0.0001944	3.0766	0	0	0
NP_001013133.2;XP_006246539.1	NP_001013133.2;XP_006246539.1	9;8	9;8	2;1	NP_001013133.2 guanylate kinase [Rattus norvegicus];XP_006246539.1 PREDICTED: guanylate kinase isoform X1 [Rattus norvegicus]	2	9	9	2	4	3	4	2	4	3	4	2	4	4	3	4	2	4	3	4	2	4	0	0	1	0	1	1	1	0	1	62.1	62.1	16	24.052	219	219;266	1	41	0	55.912	32.4	25.6	35.6
NP_001013137.1	NP_001013137.1	15	15	14	NP_001013137.1 guanine nucleotide-binding protein subunit alpha-13 [Rattus norvegicus]	1	15	15	14	8	7	7	8	4	6	6	5	7	8	7	7	8	4	6	6	5	7	7	7	7	7	4	6	6	5	7	39.3	39.3	37.1	44.011	377	377	1	69	0	77.401	22	23.3	23.3
NP_001013144.1	NP_001013144.1	8	8	8	NP_001013144.1 NADH-cytochrome b5 reductase 1 [Rattus norvegicus]	1	8	8	8	4	2	2	3	3	3	3	3	3	4	2	2	3	3	3	3	3	3	4	2	2	3	3	3	3	3	3	39	39	39	34.222	305	305	1	29	0	26.117	23.6	11.1	11.1
NP_001013161.1	NP_001013161.1	6	6	6	NP_001013161.1 telomeric repeat-binding factor 2-interacting protein 1 [Rattus norvegicus]	1	6	6	6	2	1	1	0	0	0	1	2	2	2	1	1	0	0	0	1	2	2	2	1	1	0	0	0	1	2	2	28	28	28	43.418	393	393	1	9	0	17.574	9.2	3.6	3.6
NP_001013162.2;XP_006227851.1;XP_017444581.1;XP_017444580.1	NP_001013162.2;XP_006227851.1;XP_017444581.1;XP_017444580.1	11;11;10;10	11;11;10;10	11;11;10;10	NP_001013162.2 solute carrier family 12 member 7 [Rattus norvegicus];XP_006227851.1 PREDICTED: solute carrier family 12 member 7 isoform X2 [Rattus norvegicus];XP_017444581.1 PREDICTED: solute carrier family 12 member 7 isoform X3 [Rattus norvegicus];XP_01	4	11	11	11	2	2	5	1	5	3	3	4	2	2	2	5	1	5	3	3	4	2	2	2	5	1	5	3	3	4	2	14	14	14	119.38	1083	1083;1115;1088;1120	1	29	0	86.377	2.5	2.7	7
NP_001013164.1	NP_001013164.1	1	1	1	NP_001013164.1 fos-related antigen 2 isoform 2 [Rattus norvegicus]	1	1	1	1	1	0	0	1	1	0	1	0	0	1	0	0	1	1	0	1	0	0	1	0	0	1	1	0	1	0	0	5	5	5	26.101	242	242	1	4	0.00055494	2.4413	5	0	0
NP_001013173.1	NP_001013173.1	3	3	3	NP_001013173.1 leucine-rich repeat protein SHOC-2 [Rattus norvegicus]	1	3	3	3	1	2	1	0	0	1	1	1	1	1	2	1	0	0	1	1	1	1	1	2	1	0	0	1	1	1	1	10.7	10.7	10.7	64.92	582	582	1	8	0	25.583	5	8.4	5
NP_001013185.1;XP_008762360.1	NP_001013185.1;XP_008762360.1	7;6	7;6	7;6	NP_001013185.1 wiskott-Aldrich syndrome protein family member 2 [Rattus norvegicus];XP_008762360.1 PREDICTED: wiskott-Aldrich syndrome protein family member 2 isoform X1 [Rattus norvegicus]	2	7	7	7	4	3	4	3	3	4	4	4	4	4	3	4	3	3	4	4	4	4	4	3	4	3	3	4	4	4	4	13.5	13.5	13.5	53.976	497	497;502	1	36	0	37.8	9.7	6.6	8
NP_001013186.1	NP_001013186.1	9	9	9	NP_001013186.1 dnaJ homolog subfamily C member 8 [Rattus norvegicus]	1	9	9	9	4	3	2	4	7	4	6	4	6	4	3	2	4	7	4	6	4	6	4	3	2	4	7	4	6	4	6	35.2	35.2	35.2	29.812	253	253	1	51	0	50.939	27.7	24.5	17.8
NP_001013188.2;XP_008763034.1;XP_006240604.1	NP_001013188.2;XP_008763034.1;XP_006240604.1	16;16;16	16;16;16	16;16;16	NP_001013188.2 tryptophan--tRNA ligase, cytoplasmic [Rattus norvegicus];XP_008763034.1 PREDICTED: tryptophan--tRNA ligase, cytoplasmic isoform X1 [Rattus norvegicus];XP_006240604.1 PREDICTED: tryptophan--tRNA ligase, cytoplasmic isoform X1 [Rattus norvegic	3	16	16	16	6	9	7	11	9	9	8	11	11	6	9	7	11	9	9	8	11	11	6	9	7	11	9	9	8	11	11	42.5	42.5	42.5	53.357	475	475;481;481	1	124	0	209.39	20	29.3	23.6
NP_001013195.2;XP_017452173.1;XP_017452172.1;XP_017452379.1;XP_008765007.1;XP_003750662.1;XP_008765005.1;XP_008765004.1;XP_008765003.1;XP_006244295.1;XP_006244294.1;XP_006244293.1;XP_006244292.1;XP_006244291.1;XP_006244290.1;XP_006244289.1;XP_006244287.1;XP_006244318.2;XP_008765014.1;XP_006244298.1;XP_017459270.1	NP_001013195.2;XP_017452173.1;XP_017452172.1;XP_017452379.1;XP_008765007.1;XP_003750662.1;XP_008765005.1;XP_008765004.1;XP_008765003.1;XP_006244295.1;XP_006244294.1;XP_006244293.1;XP_006244292.1;XP_006244291.1;XP_006244290.1;XP_006244289.1;XP_006244287.1;XP_006244318.2;XP_008765014.1	7;6;6;5;5;5;5;5;5;5;5;5;5;5;5;5;5;4;4;3;2	7;6;6;5;5;5;5;5;5;5;5;5;5;5;5;5;5;4;4;3;2	3;2;2;2;1;1;1;1;1;1;1;1;1;1;1;1;1;1;1;0;1	NP_001013195.2 sulfotransferase 1C2A [Rattus norvegicus];XP_017452173.1 PREDICTED: sulfotransferase 1C2A isoform X1 [Rattus norvegicus];XP_017452172.1 PREDICTED: sulfotransferase 1C2A isoform X1 [Rattus norvegicus];XP_017452379.1 PREDICTED: sulfotransferas	21	7	7	3	3	4	2	3	1	3	3	0	1	3	4	2	3	1	3	3	0	1	2	2	1	1	0	1	2	0	0	23.3	23.3	14.5	34.875	296	296;296;296;250;296;296;302;302;302;302;302;302;302;302;302;302;302;238;287;256;296	1	21	0	14.787	14.5	17.9	7.8
NP_001013200.1;XP_006246056.1	NP_001013200.1;XP_006246056.1	5;4	5;4	5;4	NP_001013200.1 jupiter microtubule associated homolog 2 [Rattus norvegicus];XP_006246056.1 PREDICTED: hematological and neurological expressed 1-like protein isoform X1 [Rattus norvegicus]	2	5	5	5	2	2	2	1	2	2	3	1	3	2	2	2	1	2	2	3	1	3	2	2	2	1	2	2	3	1	3	45.3	45.3	45.3	20.07	190	190;174	1	21	0	14.602	24.2	24.2	24.2
NP_001013201.1	NP_001013201.1	3	3	3	NP_001013201.1 cytosolic Fe-S cluster assembly factor NARFL [Rattus norvegicus]	1	3	3	3	0	0	0	0	2	2	1	0	0	0	0	0	0	2	2	1	0	0	0	0	0	0	2	2	1	0	0	9.7	9.7	9.7	53.167	476	476	1	5	0	7.877	0	0	0
NP_001013210.1	NP_001013210.1	3	3	3	NP_001013210.1 olfactomedin-like protein 1 precursor [Rattus norvegicus]	1	3	3	3	1	2	1	0	0	0	1	0	1	1	2	1	0	0	0	1	0	1	1	2	1	0	0	0	1	0	1	8	8	8	45.6	402	402	1	6	0	10.554	2.7	5.7	2.7
NP_001013217.1;XP_017446439.1	NP_001013217.1;XP_017446439.1	5;5	5;5	5;5	NP_001013217.1 peptidyl-prolyl cis-trans isomerase CWC27 homolog [Rattus norvegicus];XP_017446439.1 PREDICTED: peptidyl-prolyl cis-trans isomerase CWC27 homolog isoform X1 [Rattus norvegicus]	2	5	5	5	1	2	3	1	0	0	3	2	0	1	2	3	1	0	0	3	2	0	1	2	3	1	0	0	3	2	0	19.9	19.9	19.9	53.309	468	468;471	1	12	0	12.839	2.8	7.7	10
NP_001013218.1;XP_017446465.1	NP_001013218.1;XP_017446465.1	6;5	6;5	6;5	NP_001013218.1 acidic leucine-rich nuclear phosphoprotein 32 family member E [Rattus norvegicus];XP_017446465.1 PREDICTED: acidic leucine-rich nuclear phosphoprotein 32 family member E isoform X1 [Rattus norvegicus]	2	6	6	6	5	5	6	6	5	4	3	5	6	5	5	6	6	5	4	3	5	6	5	5	6	6	5	4	3	5	6	23.6	23.6	23.6	29.418	258	258;210	1	65	0	180.68	23.6	19.4	23.6
NP_001013224.1	NP_001013224.1	4	4	4	NP_001013224.1 28S ribosomal protein S26, mitochondrial precursor [Rattus norvegicus]	1	4	4	4	3	2	2	2	2	4	1	3	2	3	2	2	2	2	4	1	3	2	3	2	2	2	2	4	1	3	2	23.5	23.5	23.5	23.349	200	200	1	28	0	31.173	19	13.5	13.5
NP_001013227.1;XP_006235926.1;XP_006235925.1;XP_006235928.1;XP_008766894.1;XP_006221234.1;XP_002725828.1;XP_001073579.1;XP_017448165.1;NP_001123982.1	NP_001013227.1;XP_006235926.1;XP_006235925.1;XP_006235928.1	5;5;5;4;2;2;2;2;2;1	5;5;5;4;2;2;2;2;2;1	4;4;4;3;2;2;1;1;2;1	NP_001013227.1 dnaJ homolog subfamily B member 6 [Rattus norvegicus];XP_006235926.1 PREDICTED: dnaJ homolog subfamily B member 6 isoform X1 [Rattus norvegicus];XP_006235925.1 PREDICTED: dnaJ homolog subfamily B member 6 isoform X1 [Rattus norvegicus];XP_00	10	5	5	4	3	3	2	0	2	2	1	2	1	3	3	2	0	2	2	1	2	1	2	2	1	0	1	1	0	1	1	16.5	16.5	16.5	38.922	357	357;364;364;258;106;106;242;242;261;303	1	16	0	19.06	11.2	8.1	5.9
NP_001013232.1;XP_006238581.1	NP_001013232.1;XP_006238581.1	2;2	2;2	2;2	NP_001013232.1 tetratricopeptide repeat protein 4 [Rattus norvegicus];XP_006238581.1 PREDICTED: tetratricopeptide repeat protein 4 isoform X1 [Rattus norvegicus]	2	2	2	2	0	0	0	0	0	0	1	1	0	0	0	0	0	0	0	1	1	0	0	0	0	0	0	0	1	1	0	10.1	10.1	10.1	27.328	237	237;386	1	2	0.0096547	0.91438	0	0	0
NP_001013245.1	NP_001013245.1	6	6	6	NP_001013245.1 COP9 signalosome complex subunit 8 [Rattus norvegicus]	1	6	6	6	4	6	6	3	2	3	5	5	5	4	6	6	3	2	3	5	5	5	4	6	6	3	2	3	5	5	5	48.8	48.8	48.8	23.235	209	209	1	46	0	132.99	31.6	48.8	48.8
NP_001013249.1	NP_001013249.1	6	6	6	NP_001013249.1 astrocytic phosphoprotein PEA-15 [Rattus norvegicus]	1	6	6	6	5	4	5	4	5	4	4	5	3	5	4	5	4	5	4	4	5	3	5	4	5	4	5	4	4	5	3	62.3	62.3	62.3	15.04	130	130	1	56	0	323.31	62.3	54.6	62.3
NP_001013254.1	NP_001013254.1	16	16	16	NP_001013254.1 ribonucleoside-diphosphate reductase large subunit [Rattus norvegicus]	1	16	16	16	5	2	4	3	6	5	6	9	10	5	2	4	3	6	5	6	9	10	5	2	4	3	6	5	6	9	10	32.1	32.1	32.1	90.292	792	792	1	56	0	63.348	10.2	5.2	11.5
NP_001013263.1;XP_017446497.1	NP_001013263.1	9;2	9;2	9;2	NP_001013263.1 tubulin-specific chaperone A [Rattus norvegicus]	2	9	9	9	4	5	4	3	4	4	8	4	4	4	5	4	3	4	4	8	4	4	4	5	4	3	4	4	8	4	4	53.7	53.7	53.7	12.744	108	108;111	1	55	0	117.78	25.9	26.9	25.9
NP_001013264.1	NP_001013264.1	8	8	8	NP_001013264.1 rho guanine nucleotide exchange factor 12 [Rattus norvegicus]	1	8	8	8	2	2	2	0	0	0	0	2	0	2	2	2	0	0	0	0	2	0	2	2	2	0	0	0	0	2	0	6.7	6.7	6.7	172.67	1546	1546	1	8	0	5.8125	2.3	1.7	1.4
NP_001013270.1	NP_001013270.1	8	8	8	NP_001013270.1 signal recognition particle receptor subunit beta [Rattus norvegicus]	1	8	8	8	4	2	2	4	4	5	6	5	6	4	2	2	4	4	5	6	5	6	4	2	2	4	4	5	6	5	6	38.3	38.3	38.3	29.569	269	269	1	44	0	104.92	23	13.4	11.2
NP_001013444.1;XP_003754491.1;XP_003750600.1	NP_001013444.1;XP_003754491.1;XP_003750600.1	6;5;5	6;5;5	6;5;5	NP_001013444.1 39S ribosomal protein L41, mitochondrial precursor [Rattus norvegicus];XP_003754491.1 PREDICTED: 39S ribosomal protein L41, mitochondrial-like [Rattus norvegicus];XP_003750600.1 PREDICTED: 39S ribosomal protein L41, mitochondrial-like [Rattu	3	6	6	6	3	3	1	2	2	3	2	3	4	3	3	1	2	2	3	2	3	4	3	3	1	2	2	3	2	3	4	49.3	49.3	49.3	15.192	134	134;134;134	1	26	0	20.46	22.4	23.9	9.7
NP_001013450.1;XP_008764162.1;XP_006242706.1	NP_001013450.1;XP_008764162.1;XP_006242706.1	2;2;2	2;2;2	2;2;2	NP_001013450.1 transmembrane emp24 domain-containing protein 1 precursor [Rattus norvegicus];XP_008764162.1 PREDICTED: transmembrane emp24 domain-containing protein 1 isoform X2 [Rattus norvegicus];XP_006242706.1 PREDICTED: transmembrane emp24 domain-conta	3	2	2	2	1	2	1	0	1	2	1	0	1	1	2	1	0	1	2	1	0	1	1	2	1	0	1	2	1	0	1	11.5	11.5	11.5	25.209	227	227;241;262	1	10	0	4.9927	4	11.5	4
NP_001013452.1	NP_001013452.1	6	4	4	NP_001013452.1 ras-related protein R-Ras2 [Rattus norvegicus]	1	6	4	4	3	4	3	3	4	3	3	4	3	1	2	1	1	2	1	2	2	1	1	2	1	1	2	1	2	2	1	36.3	23	23	23.399	204	204	1	16	0	14.664	19.1	26.5	19.1
NP_001013875.1	NP_001013875.1	8	6	6	NP_001013875.1 hemoglobin alpha, adult chain 1 [Rattus norvegicus]	1	8	6	6	6	6	4	6	4	6	4	3	4	4	5	2	4	2	4	2	1	2	4	5	2	4	2	4	2	1	2	64.1	57.7	57.7	15.524	142	142	1	35	0	14.413	45.1	55.6	37.3
NP_001013881.1;XP_017452605.1	NP_001013881.1;XP_017452605.1	4;2	4;2	4;2	NP_001013881.1 inositol polyphosphate 5-phosphatase K [Rattus norvegicus];XP_017452605.1 PREDICTED: inositol polyphosphate 5-phosphatase K isoform X1 [Rattus norvegicus]	2	4	4	4	1	2	1	0	0	0	1	0	0	1	2	1	0	0	0	1	0	0	1	2	1	0	0	0	1	0	0	11.2	11.2	11.2	51.851	446	446;349	1	5	0.0039009	1.3297	1.8	5.8	2.9
NP_001013882.1	NP_001013882.1	4	4	4	NP_001013882.1 peptidyl-tRNA hydrolase 2, mitochondrial [Rattus norvegicus]	1	4	4	4	4	3	2	3	4	4	3	3	4	4	3	2	3	4	4	3	3	4	4	3	2	3	4	4	3	3	4	36.5	36.5	36.5	19.529	181	181	1	45	0	29.343	36.5	27.6	19.9
NP_001013902.2	NP_001013902.2	12	12	12	NP_001013902.2 inositol-3-phosphate synthase 1 [Rattus norvegicus]	1	12	12	12	6	6	5	8	6	5	8	8	9	6	6	5	8	6	5	8	8	9	6	6	5	8	6	5	8	8	9	31.4	31.4	31.4	60.883	557	557	1	73	0	159.3	18.7	18.3	16.5
NP_001013903.2;XP_017455524.1;XP_017455523.1;XP_008769312.1;XP_006252949.1;XP_006252945.1;XP_006252944.1;XP_006252943.1;XP_006252942.1;XP_006252941.1	NP_001013903.2;XP_017455524.1;XP_017455523.1;XP_008769312.1;XP_006252949.1;XP_006252945.1;XP_006252944.1;XP_006252943.1;XP_006252942.1;XP_006252941.1	7;7;7;7;7;7;7;7;7;7	6;6;6;6;6;6;6;6;6;6	6;6;6;6;6;6;6;6;6;6	NP_001013903.2 transcriptional repressor p66-alpha [Rattus norvegicus];XP_017455524.1 PREDICTED: transcriptional repressor p66-alpha isoform X6 [Rattus norvegicus];XP_017455523.1 PREDICTED: transcriptional repressor p66-alpha isoform X6 [Rattus norvegicus]	10	7	6	6	0	4	3	2	1	2	3	4	2	0	4	3	2	1	1	3	4	2	0	4	3	2	1	1	3	4	2	15.7	14.1	14.1	67.568	630	630;633;633;633;633;667;688;689;691;692	1	21	0	10.314	0	10.2	8.4
NP_001013908.2;XP_003749686.1;XP_001055765.1;CON__ENSEMBL:ENSBTAP00000025008	NP_001013908.2	21;5;5;5	6;0;0;0	1;0;0;0	NP_001013908.2 tubulin beta-2B chain [Rattus norvegicus]	4	21	6	1	21	21	20	19	19	20	20	19	19	6	6	6	5	6	5	6	6	6	1	1	1	1	1	0	1	1	1	52.1	20.2	2.7	49.953	445	445;452;452;536	1	125	0	95.201	52.1	52.1	52.1
NP_001013911.1;XP_008758816.1;XP_017460411.1	NP_001013911.1	5;1;1	1;0;0	1;0;0	NP_001013911.1 carboxylesterase-like precursor [Rattus norvegicus]	3	5	1	1	3	2	1	4	2	2	4	2	2	0	1	1	1	1	1	1	0	0	0	1	1	1	1	1	1	0	0	11	1.6	1.6	62.152	565	565;446;551	1	6	0.00019249	2.9076	8.1	5.8	1.6
NP_001013917.1	NP_001013917.1	2	1	1	NP_001013917.1 serine/threonine-protein kinase D2 [Rattus norvegicus]	1	2	1	1	0	0	0	1	0	0	0	2	0	0	0	0	0	0	0	0	1	0	0	0	0	0	0	0	0	1	0	3.1	1.5	1.5	96.496	875	875	1	1	0.00019205	2.8763	0	0	0
NP_001013929.1	NP_001013929.1	3	3	3	NP_001013929.1 dnaJ homolog subfamily B member 12 [Rattus norvegicus]	1	3	3	3	0	0	0	3	0	1	2	1	0	0	0	0	3	0	1	2	1	0	0	0	0	3	0	1	2	1	0	10.1	10.1	10.1	42.521	378	378	1	7	0	12.199	0	0	0
NP_001013938.1	NP_001013938.1	1	1	1	NP_001013938.1 CD302 antigen precursor [Rattus norvegicus]	1	1	1	1	0	0	1	0	0	0	0	0	0	0	0	1	0	0	0	0	0	0	0	0	1	0	0	0	0	0	0	8.3	8.3	8.3	25.451	228	228	1	1	0.00070972	1.8551	0	0	8.3
NP_001013941.1;XP_017447065.1;XP_006234966.1	NP_001013941.1;XP_017447065.1;XP_006234966.1	6;4;4	6;4;4	2;0;0	NP_001013941.1 N-acetylgalactosamine kinase [Rattus norvegicus];XP_017447065.1 PREDICTED: N-acetylgalactosamine kinase isoform X2 [Rattus norvegicus];XP_006234966.1 PREDICTED: N-acetylgalactosamine kinase isoform X1 [Rattus norvegicus]	3	6	6	2	4	3	2	3	4	2	3	3	3	4	3	2	3	4	2	3	3	3	1	0	0	0	1	0	0	0	0	17.5	17.5	3.5	50.197	458	458;413;434	1	30	0	16.756	10.7	10.7	5.7
NP_001013944.1	NP_001013944.1	1	1	1	NP_001013944.1 RAB5-interacting protein [Rattus norvegicus]	1	1	1	1	0	0	0	0	1	1	0	0	1	0	0	0	0	1	1	0	0	1	0	0	0	0	1	1	0	0	1	12.4	12.4	12.4	14.825	129	129	1	3	0.00072098	2.0687	0	0	0
NP_001013945.1;XP_017458158.1;XP_017458161.1;XP_017458160.1;XP_017458159.1	NP_001013945.1	5;2;1;1;1	5;2;1;1;1	5;2;1;1;1	NP_001013945.1 protein NDRG3 [Rattus norvegicus]	5	5	5	5	2	1	1	1	1	1	3	4	3	2	1	1	1	1	1	3	4	3	2	1	1	1	1	1	3	4	3	20	20	20	41.506	375	375;318;95;107;107	1	23	0	32.91	8.5	4.5	4.5
NP_001013947.1	NP_001013947.1	4	4	4	NP_001013947.1 NEDD8 ultimate buster 1 [Rattus norvegicus]	1	4	4	4	1	1	2	1	0	0	2	0	0	1	1	2	1	0	0	2	0	0	1	1	2	1	0	0	2	0	0	7.3	7.3	7.3	70.168	613	613	1	7	0	36.051	2.4	2.3	3.6
NP_001013949.1	NP_001013949.1	5	5	5	NP_001013949.1 phospholipase B-like 1 precursor [Rattus norvegicus]	1	5	5	5	3	3	2	1	4	3	1	3	1	3	3	2	1	4	3	1	3	1	3	3	2	1	4	3	1	3	1	11.8	11.8	11.8	63.027	550	550	1	23	0	61.543	6.4	7.6	4.4
NP_001013960.1	NP_001013960.1	2	2	2	NP_001013960.1 von Willebrand factor A domain-containing protein 1 precursor [Rattus norvegicus]	1	2	2	2	0	1	0	0	0	1	0	0	0	0	1	0	0	0	1	0	0	0	0	1	0	0	0	1	0	0	0	8.2	8.2	8.2	44.832	415	415	1	3	0	6.319	0	4.3	0
NP_001013961.1	NP_001013961.1	14	14	14	NP_001013961.1 ribonucleoprotein PTB-binding 1 [Rattus norvegicus]	1	14	14	14	6	6	4	4	6	4	7	8	8	6	6	4	4	6	4	7	8	8	6	6	4	4	6	4	7	8	8	29	29	29	79.288	748	748	1	63	0	158.05	16.7	15.2	10.8
NP_001013982.1	NP_001013982.1	13	13	13	NP_001013982.1 acyl-coenzyme A thioesterase 9, mitochondrial [Rattus norvegicus]	1	13	13	13	8	7	6	6	8	7	3	6	5	8	7	6	6	8	7	3	6	5	8	7	6	6	8	7	3	6	5	32.8	32.8	32.8	50.443	439	439	1	67	0	77.146	22.1	21.9	18.7
NP_001013985.1	NP_001013985.1	6	6	6	NP_001013985.1 serine/threonine-protein phosphatase CPPED1 [Rattus norvegicus]	1	6	6	6	1	2	0	2	3	4	1	5	4	1	2	0	2	3	4	1	5	4	1	2	0	2	3	4	1	5	4	25	25	25	35.26	312	312	1	24	0	30.783	3.5	7.1	0
NP_001013993.1	NP_001013993.1	2	2	2	NP_001013993.1 CUE domain-containing protein 1 [Rattus norvegicus]	1	2	2	2	0	0	1	0	1	0	0	0	0	0	0	1	0	1	0	0	0	0	0	0	1	0	1	0	0	0	0	10.1	10.1	10.1	42.91	388	388	1	2	0.0026069	1.5891	0	0	5.9
NP_001013996.1	NP_001013996.1	14	14	14	NP_001013996.1 coiled-coil domain-containing protein 47 precursor [Rattus norvegicus]	1	14	14	14	9	7	5	9	7	9	6	10	6	9	7	5	9	7	9	6	10	6	9	7	5	9	7	9	6	10	6	30.2	30.2	30.2	55.732	483	483	1	83	0	94.035	26.3	21.9	17.2
NP_001013998.1	NP_001013998.1	2	2	2	NP_001013998.1 2-oxoglutarate and iron-dependent oxygenase domain-containing protein 3 [Rattus norvegicus]	1	2	2	2	1	0	1	0	0	0	0	0	0	1	0	1	0	0	0	0	0	0	1	0	1	0	0	0	0	0	0	12.4	12.4	12.4	35.384	315	315	1	2	0	5.3188	4.4	0	7.9
NP_001014005.1;XP_017453832.1	NP_001014005.1	11;4	11;4	11;4	NP_001014005.1 malectin precursor [Rattus norvegicus]	2	11	11	11	10	8	8	5	8	9	6	9	8	10	8	8	5	8	9	6	9	8	10	8	8	5	8	9	6	9	8	37.5	37.5	37.5	32.418	291	291;216	1	104	0	240.74	35.1	27.1	27.1
NP_001014006.1;XP_006250059.1	NP_001014006.1;XP_006250059.1	3;2	3;2	3;2	NP_001014006.1 N-acetylneuraminate lyase [Rattus norvegicus];XP_006250059.1 PREDICTED: N-acetylneuraminate lyase isoform X1 [Rattus norvegicus]	2	3	3	3	3	0	0	1	0	0	1	1	0	3	0	0	1	0	0	1	1	0	3	0	0	1	0	0	1	1	0	10.6	10.6	10.6	35.115	320	320;289	1	6	0.00018843	2.6555	10.6	0	0
NP_001014010.1	NP_001014010.1	1	1	1	NP_001014010.1 starch-binding domain-containing protein 1 [Rattus norvegicus]	1	1	1	1	0	0	0	0	1	1	0	0	0	0	0	0	0	1	1	0	0	0	0	0	0	0	1	1	0	0	0	6	6	6	35.494	333	333	1	2	0.00019543	3.152	0	0	0
NP_001014011.1;XP_006250798.1;XP_006250797.1;XP_006250796.1;XP_006250795.1	NP_001014011.1;XP_006250798.1;XP_006250797.1;XP_006250796.1;XP_006250795.1	8;8;8;8;8	7;7;7;7;7	7;7;7;7;7	NP_001014011.1 ras GTPase-activating protein-binding protein 2 [Rattus norvegicus];XP_006250798.1 PREDICTED: ras GTPase-activating protein-binding protein 2 isoform X1 [Rattus norvegicus];XP_006250797.1 PREDICTED: ras GTPase-activating protein-binding prot	5	8	7	7	6	5	5	5	5	5	4	6	6	5	4	4	5	4	4	4	5	5	5	4	4	5	4	4	4	5	5	25.2	22.5	22.5	50.77	449	449;482;482;482;482	1	70	0	84.513	20.5	18.3	18.3
NP_001014020.2	NP_001014020.2	6	6	6	NP_001014020.2 2,5-phosphodiesterase 12 [Rattus norvegicus]	1	6	6	6	5	4	2	4	3	3	3	4	3	5	4	2	4	3	3	3	4	3	5	4	2	4	3	3	3	4	3	15.2	15.2	15.2	78.885	705	705	1	37	0	35.081	10.4	10.5	3.7
NP_001014022.1;XP_006253209.1	NP_001014022.1;XP_006253209.1	5;4	5;4	5;4	NP_001014022.1 CDKN2A-interacting protein [Rattus norvegicus];XP_006253209.1 PREDICTED: CDKN2A-interacting protein isoform X1 [Rattus norvegicus]	2	5	5	5	0	1	2	1	2	2	2	2	2	0	1	2	1	2	2	2	2	2	0	1	2	1	2	2	2	2	2	11.4	11.4	11.4	60.743	570	570;119	1	14	0	19.358	0	1.6	3.9
NP_001014034.2;XP_006254637.1	NP_001014034.2;XP_006254637.1	6;5	4;3	4;3	NP_001014034.2 probable histidine--tRNA ligase, mitochondrial [Rattus norvegicus];XP_006254637.1 PREDICTED: probable histidine--tRNA ligase, mitochondrial isoform X1 [Rattus norvegicus]	2	6	4	4	3	0	2	1	1	2	3	1	4	2	0	1	0	0	0	2	0	3	2	0	1	0	0	0	2	0	3	11.6	8.1	8.1	57.327	507	507;467	1	8	0.00072241	2.1089	6.5	0	4.3
NP_001014061.1;XP_017446387.1;XP_017446386.1	NP_001014061.1;XP_017446387.1;XP_017446386.1	2;2;2	2;2;2	2;2;2	NP_001014061.1 tumor necrosis factor alpha-induced protein 8-like protein 2 [Rattus norvegicus];XP_017446387.1 PREDICTED: tumor necrosis factor alpha-induced protein 8-like protein 2 isoform X2 [Rattus norvegicus];XP_017446386.1 PREDICTED: tumor necrosis f	3	2	2	2	0	0	0	0	1	0	0	1	1	0	0	0	0	1	0	0	1	1	0	0	0	0	1	0	0	1	1	11.4	11.4	11.4	20.751	184	184;201;218	1	3	0.00037182	2.5121	0	0	0
NP_001014068.1;XP_017447702.1;XP_017447701.1	NP_001014068.1;XP_017447702.1;XP_017447701.1	7;6;6	7;6;6	7;6;6	NP_001014068.1 regulator of microtubule dynamics protein 3 [Rattus norvegicus];XP_017447702.1 PREDICTED: regulator of microtubule dynamics protein 3-like isoform X2 [Rattus norvegicus];XP_017447701.1 PREDICTED: regulator of microtubule dynamics protein 3-l	3	7	7	7	5	1	1	2	3	3	2	3	4	5	1	1	2	3	3	2	3	4	5	1	1	2	3	3	2	3	4	22.1	22.1	22.1	52.311	471	471;265;265	1	29	0	92.715	17	3	3
NP_001014070.1	NP_001014070.1	2	2	2	NP_001014070.1 CTD small phosphatase-like protein 2 [Rattus norvegicus]	1	2	2	2	2	0	0	0	0	1	0	0	0	2	0	0	0	0	1	0	0	0	2	0	0	0	0	1	0	0	0	5.2	5.2	5.2	52.782	465	465	1	3	0.0043793	1.2421	5.2	0	0
NP_001014090.1	NP_001014090.1	3	3	3	NP_001014090.1 4-hydroxyphenylpyruvate dioxygenase-like protein [Rattus norvegicus]	1	3	3	3	0	0	1	0	0	0	0	1	2	0	0	1	0	0	0	0	1	2	0	0	1	0	0	0	0	1	2	9.7	9.7	9.7	40.032	371	371	1	4	0.0069744	1.0818	0	0	3.8
NP_001014095.1	NP_001014095.1	8	6	6	NP_001014095.1 protein FAM98A [Rattus norvegicus]	1	8	6	6	4	5	5	4	6	6	3	6	6	4	3	3	3	4	5	2	5	5	4	3	3	3	4	5	2	5	5	21.4	15.1	15.1	55.07	515	515	1	47	0	215.79	12.6	14.2	14.4
NP_001014099.1	NP_001014099.1	1	1	1	NP_001014099.1 C-type lectin domain family 14 member A precursor [Rattus norvegicus]	1	1	1	1	0	0	1	0	1	1	1	0	0	0	0	1	0	1	1	1	0	0	0	0	1	0	1	1	1	0	0	3.8	3.8	3.8	50.179	468	468	1	4	0.0005531	2.3867	0	0	3.8
NP_001014111.1;XP_006242921.1	NP_001014111.1;XP_006242921.1	10;10	10;10	10;10	NP_001014111.1 tubulin-specific chaperone cofactor E-like protein [Rattus norvegicus];XP_006242921.1 PREDICTED: tubulin-specific chaperone cofactor E-like protein isoform X1 [Rattus norvegicus]	2	10	10	10	1	3	2	2	4	3	3	1	1	1	3	2	2	4	3	3	1	1	1	3	2	2	4	3	3	1	1	38.9	38.9	38.9	48.045	424	424;442	1	20	0	26.552	4	12.5	10.8
NP_001014120.1;XP_006243854.1;XP_006243853.1;XP_006243852.1;XP_006243851.1;XP_006243850.1	NP_001014120.1;XP_006243854.1;XP_006243853.1;XP_006243852.1;XP_006243851.1;XP_006243850.1	6;6;6;6;6;6	6;6;6;6;6;6	6;6;6;6;6;6	NP_001014120.1 coiled-coil domain-containing protein 51 [Rattus norvegicus];XP_006243854.1 PREDICTED: coiled-coil domain-containing protein 51 isoform X4 [Rattus norvegicus];XP_006243853.1 PREDICTED: coiled-coil domain-containing protein 51 isoform X4 [Rat	6	6	6	6	4	1	2	0	2	2	1	1	3	4	1	2	0	2	2	1	1	3	4	1	2	0	2	2	1	1	3	26.6	26.6	26.6	42.308	379	379;410;410;429;441;493	1	20	0	51.065	20.8	5.5	14.8
NP_001014127.1;XP_006257253.1	NP_001014127.1;XP_006257253.1	8;8	8;8	8;8	NP_001014127.1 MICOS complex subunit MIC27 [Rattus norvegicus];XP_006257253.1 PREDICTED: MICOS complex subunit MIC27 isoform X1 [Rattus norvegicus]	2	8	8	8	5	5	4	4	7	4	4	6	5	5	5	4	4	7	4	4	6	5	5	5	4	4	7	4	4	6	5	43.7	43.7	43.7	28.237	254	254;265	1	67	0	64.578	28	26.4	21.7
NP_001014128.1	NP_001014128.1	3	3	3	NP_001014128.1 riboflavin kinase [Rattus norvegicus]	1	3	3	3	2	2	2	1	1	0	1	1	2	2	2	2	1	1	0	1	1	2	2	2	2	1	1	0	1	1	2	26.5	26.5	26.5	17.481	155	155	1	15	0	9.2456	19.4	19.4	19.4
NP_001014135.2	NP_001014135.2	2	2	2	NP_001014135.2 U3 small nucleolar RNA-associated protein 14 homolog A [Rattus norvegicus]	1	2	2	2	0	0	1	0	0	1	0	1	2	0	0	1	0	0	1	0	1	2	0	0	1	0	0	1	0	1	2	3.3	3.3	3.3	87.161	765	765	1	5	0	6.7571	0	0	1.4
NP_001014138.1;XP_006246061.1;XP_006246060.1	NP_001014138.1;XP_006246061.1;XP_006246060.1	1;1;1	1;1;1	1;1;1	NP_001014138.1 jmjC domain-containing protein 8 precursor [Rattus norvegicus];XP_006246061.1 PREDICTED: jmjC domain-containing protein 8 isoform X2 [Rattus norvegicus];XP_006246060.1 PREDICTED: jmjC domain-containing protein 8 isoform X1 [Rattus norvegicus	3	1	1	1	1	0	0	0	1	1	0	1	0	1	0	0	0	1	1	0	1	0	1	0	0	0	1	1	0	1	0	4.8	4.8	4.8	30.751	271	271;290;317	1	4	0.00019716	3.2979	4.8	0	0
NP_001014141.2;XP_006247107.1;XP_008766291.1	NP_001014141.2;XP_006247107.1	7;6;3	7;6;3	7;6;3	NP_001014141.2 dehydrogenase/reductase SDR family member 11 [Rattus norvegicus];XP_006247107.1 PREDICTED: dehydrogenase/reductase SDR family member 11 isoform X2 [Rattus norvegicus]	3	7	7	7	4	4	2	5	4	2	3	2	2	4	4	2	5	4	2	3	2	2	4	4	2	5	4	2	3	2	2	28.8	28.8	28.8	28.371	260	260;294;301	1	31	0	32.704	20.4	18.5	8.5
NP_001014142.1	NP_001014142.1	9	9	9	NP_001014142.1 peptidyl-prolyl cis-trans isomerase FKBP10 precursor [Rattus norvegicus]	1	9	9	9	3	3	2	4	7	4	2	2	3	3	3	2	4	7	4	2	2	3	3	3	2	4	7	4	2	2	3	15.7	15.7	15.7	64.786	581	581	1	39	0	99.82	6.9	6.7	5.5
NP_001014147.1;XP_006248480.1	NP_001014147.1	13;5	13;5	13;5	NP_001014147.1 protein disulfide-isomerase A5 precursor [Rattus norvegicus]	2	13	13	13	7	4	5	5	9	7	3	5	5	7	4	5	5	9	7	3	5	5	7	4	5	5	9	7	3	5	5	42.6	42.6	42.6	59.399	517	517;322	1	66	0	98.31	25.3	17.8	20.5
NP_001014157.1	NP_001014157.1	27	27	27	NP_001014157.1 WD repeat-containing protein 1 [Rattus norvegicus]	1	27	27	27	21	15	15	18	20	19	16	19	17	21	15	15	18	20	19	16	19	17	21	15	15	18	20	19	16	19	17	52.5	52.5	52.5	66.181	606	606	1	297	0	323.31	46.9	36.8	38
NP_001014158.1	NP_001014158.1	7	7	7	NP_001014158.1 peptide-N(4)-(N-acetyl-beta-glucosaminyl)asparagine amidase [Rattus norvegicus]	1	7	7	7	1	4	3	3	2	1	5	2	3	1	4	3	3	2	1	5	2	3	1	4	3	3	2	1	5	2	3	20.1	20.1	20.1	69.241	603	603	1	25	0	28.551	1.8	9.5	6.6
NP_001014172.3;XP_006254726.1	NP_001014172.3;XP_006254726.1	1;1	1;1	1;1	NP_001014172.3 protein YIPF5 [Rattus norvegicus];XP_006254726.1 PREDICTED: protein YIPF5 isoform X1 [Rattus norvegicus]	2	1	1	1	0	1	1	0	1	0	1	0	1	0	1	1	0	1	0	1	0	1	0	1	1	0	1	0	1	0	1	3.5	3.5	3.5	27.903	257	257;655	1	5	0.00054456	2.1698	0	3.5	3.5
NP_001014173.2	NP_001014173.2	6	6	2	NP_001014173.2 haloacid dehalogenase-like hydrolase domain-containing protein 2 precursor [Rattus norvegicus]	1	6	6	2	6	4	3	4	3	3	4	3	5	6	4	3	4	3	3	4	3	5	2	2	2	2	2	2	2	2	2	27.3	27.3	7.3	42.475	384	384	1	45	0	39.301	27.3	16.1	12.8
NP_001014183.1	NP_001014183.1	24	24	23	NP_001014183.1 isocitrate dehydrogenase [NADP], mitochondrial precursor [Rattus norvegicus]	1	24	24	23	18	21	20	16	21	21	17	19	21	18	21	20	16	21	21	17	19	21	18	20	19	16	20	20	16	18	20	42.3	42.3	40.3	50.967	452	452	1	300	0	323.31	37.6	39.8	39.8
NP_001014188.1;XP_008758566.1	NP_001014188.1;XP_008758566.1	1;1	1;1	1;1	NP_001014188.1 interleukin-33 [Rattus norvegicus];XP_008758566.1 PREDICTED: interleukin-33 isoform X1 [Rattus norvegicus]	2	1	1	1	0	1	1	0	0	0	1	0	0	0	1	1	0	0	0	1	0	0	0	1	1	0	0	0	1	0	0	5.7	5.7	5.7	29.485	264	264;269	1	3	0.00019885	3.445	0	5.7	5.7
NP_001014203.1	NP_001014203.1	1	1	1	NP_001014203.1 diphthine--ammonia ligase [Rattus norvegicus]	1	1	1	1	1	0	0	0	0	0	0	0	0	1	0	0	0	0	0	0	0	0	1	0	0	0	0	0	0	0	0	5.2	5.2	5.2	29.984	267	267	1	1	0.00055188	2.3612	5.2	0	0
NP_001014207.2	NP_001014207.2	6	5	4	NP_001014207.2 serine/arginine-rich splicing factor 6 [Rattus norvegicus]	1	6	5	4	3	4	3	4	4	4	3	3	5	2	3	2	4	3	3	2	2	4	2	3	2	3	3	3	2	2	4	18.3	15.6	12.1	39.025	339	339	1	33	0	15.627	7.4	11.2	8.6
NP_001014209.1;XP_006236643.1	NP_001014209.1;XP_006236643.1	5;3	5;3	5;3	NP_001014209.1 lanC-like protein 2 [Rattus norvegicus];XP_006236643.1 PREDICTED: lanC-like protein 2 isoform X1 [Rattus norvegicus]	2	5	5	5	2	3	3	1	3	2	1	3	2	2	3	3	1	3	2	1	3	2	2	3	3	1	3	2	1	3	2	14.7	14.7	14.7	50.968	450	450;363	1	23	0	59.937	6.2	10	9.6
NP_001014210.1	NP_001014210.1	4	4	4	NP_001014210.1 pre-mRNA-splicing factor ISY1 homolog [Rattus norvegicus]	1	4	4	4	0	0	0	2	2	2	2	2	2	0	0	0	2	2	2	2	2	2	0	0	0	2	2	2	2	2	2	19.4	19.4	19.4	32.861	284	284	1	12	0	8.8552	0	0	0
NP_001014216.1	NP_001014216.1	1	1	1	NP_001014216.1 dnaJ homolog subfamily C member 16 precursor [Rattus norvegicus]	1	1	1	1	0	0	0	0	0	0	0	1	1	0	0	0	0	0	0	0	1	1	0	0	0	0	0	0	0	1	1	1.7	1.7	1.7	88.868	771	771	1	3	0.00054555	2.2021	0	0	0
NP_001014217.2	NP_001014217.2	8	8	8	NP_001014217.2 transmembrane protein 214 [Rattus norvegicus]	1	8	8	8	3	2	1	1	3	4	1	2	3	3	2	1	1	3	4	1	2	3	3	2	1	1	3	4	1	2	3	17.4	17.4	17.4	76.565	685	685	1	21	0	10.779	9.1	3.8	2.3
NP_001014224.1	NP_001014224.1	3	3	3	NP_001014224.1 derlin-1 [Rattus norvegicus]	1	3	3	3	1	2	0	0	1	1	1	1	0	1	2	0	0	1	1	1	1	0	1	2	0	0	1	1	1	1	0	13.1	13.1	13.1	28.834	251	251	1	7	0	4.026	4.4	8.8	0
NP_001014228.1	NP_001014228.1	5	5	5	NP_001014228.1 ester hydrolase C11orf54 homolog [Rattus norvegicus]	1	5	5	5	3	4	2	3	4	4	3	4	4	3	4	2	3	4	4	3	4	4	3	4	2	3	4	4	3	4	4	13.3	13.3	13.3	34.993	315	315	1	39	0	42.229	11.1	11.1	7.6
NP_001014230.1	NP_001014230.1	3	3	3	NP_001014230.1 protein YIPF2 [Rattus norvegicus]	1	3	3	3	1	2	2	0	1	1	0	0	2	1	2	2	0	1	1	0	0	2	1	2	2	0	1	1	0	0	2	18.3	18.3	18.3	34.798	311	311	1	11	0	61.905	10.3	14.5	14.5
NP_001014233.1;XP_017451229.1	NP_001014233.1;XP_017451229.1	8;5	8;5	8;5	NP_001014233.1 myocardial zonula adherens protein precursor [Rattus norvegicus];XP_017451229.1 PREDICTED: myocardial zonula adherens protein isoform X1 [Rattus norvegicus]	2	8	8	8	3	3	5	2	5	5	4	5	4	3	3	5	2	5	5	4	5	4	3	3	5	2	5	5	4	5	4	19.7	19.7	19.7	53.955	466	466;390	1	37	0	59.062	7.1	7.9	13.1
NP_001014242.1	NP_001014242.1	4	4	2	NP_001014242.1 nuclear autoantigen Sp-100 [Rattus norvegicus]	1	4	4	2	1	1	1	1	1	1	1	2	3	1	1	1	1	1	1	1	2	3	0	0	0	0	0	0	0	1	1	11.7	11.7	5.8	38.404	342	342	1	12	0	4.8431	2.9	2.9	2.9
NP_001014249.1	NP_001014249.1	18	18	18	NP_001014249.1 glyoxalase domain-containing protein 4 [Rattus norvegicus]	1	18	18	18	12	13	12	10	14	11	11	12	14	12	13	12	10	14	11	11	12	14	12	13	12	10	14	11	11	12	14	60.4	60.4	60.4	33.267	298	298	1	140	0	128.39	50	57.4	55
NP_001014254.1	NP_001014254.1	2	2	2	NP_001014254.1 CB1 cannabinoid receptor-interacting protein 1 [Rattus norvegicus]	1	2	2	2	2	1	1	2	1	1	1	1	2	2	1	1	2	1	1	1	1	2	2	1	1	2	1	1	1	1	2	16.5	16.5	16.5	18.658	164	164	1	12	0	6.1724	16.5	9.8	9.8
NP_001014275.2	NP_001014275.2	3	3	3	NP_001014275.2 thioredoxin reductase-like selenoprotein T precursor [Rattus norvegicus]	1	3	3	3	1	1	0	2	1	1	1	2	1	1	1	0	2	1	1	1	2	1	1	1	0	2	1	1	1	2	1	23.6	23.6	23.6	22.292	195	195	1	12	0	12.127	10.8	6.7	0
NP_001014277.1;XP_006233039.1	NP_001014277.1;XP_006233039.1	1;1	1;1	1;1	NP_001014277.1 gamma-secretase subunit APH-1A [Rattus norvegicus];XP_006233039.1 PREDICTED: gamma-secretase subunit APH-1A isoform X1 [Rattus norvegicus]	2	1	1	1	0	1	0	0	0	0	1	1	0	0	1	0	0	0	0	1	1	0	0	1	0	0	0	0	1	1	0	5.7	5.7	5.7	26.799	247	247;265	1	3	0	5.1898	0	5.7	0
NP_001014280.1	NP_001014280.1	1	1	1	NP_001014280.1 cardiolipin synthase (CMP-forming) [Rattus norvegicus]	1	1	1	1	1	1	0	0	0	0	0	0	0	1	1	0	0	0	0	0	0	0	1	1	0	0	0	0	0	0	0	6.3	6.3	6.3	32.628	302	302	1	3	0	5.3388	6.3	6.3	0
NP_001014290.1	NP_001014290.1	9	8	8	NP_001014290.1 leucine-rich repeat-containing protein 1 [Rattus norvegicus]	1	9	8	8	7	3	4	5	5	6	2	3	4	7	3	3	4	5	5	1	2	3	7	3	3	4	5	5	1	2	3	28.1	25.6	25.6	59.373	524	524	1	42	0	146.73	23.7	11.1	12.4
NP_001014762.1	NP_001014762.1	2	2	2	NP_001014762.1 p53 and DNA damage-regulated protein 1 [Rattus norvegicus]	1	2	2	2	0	0	0	1	0	0	0	1	1	0	0	0	1	0	0	0	1	1	0	0	0	1	0	0	0	1	1	16.5	16.5	16.5	15.392	133	133	1	3	0.000189	2.6851	0	0	0
NP_001014772.1	NP_001014772.1	2	2	2	NP_001014772.1 disintegrin and metalloproteinase domain-containing protein 9 precursor [Rattus norvegicus]	1	2	2	2	1	0	1	1	1	1	1	1	0	1	0	1	1	1	1	1	1	0	1	0	1	1	1	1	1	1	0	4.1	4.1	4.1	92.324	845	845	1	7	0	6.7454	2.4	0	1.8
NP_001014785.1;XP_006238099.1	NP_001014785.1;XP_006238099.1	14;12	14;12	14;12	NP_001014785.1 nuclear cap-binding protein subunit 1 [Rattus norvegicus];XP_006238099.1 PREDICTED: nuclear cap-binding protein subunit 1 isoform X1 [Rattus norvegicus]	2	14	14	14	8	7	4	5	8	12	4	11	9	8	7	4	5	8	12	4	11	9	8	7	4	5	8	12	4	11	9	21.6	21.6	21.6	91.91	790	790;683	1	77	0	87.397	14.1	13	7.5
NP_001014792.1;XP_006252189.1	NP_001014792.1;XP_006252189.1	10;9	10;9	7;6	NP_001014792.1 importin subunit alpha-4 [Rattus norvegicus];XP_006252189.1 PREDICTED: importin subunit alpha-4 isoform X1 [Rattus norvegicus]	2	10	10	7	6	5	6	6	4	4	5	7	5	6	5	6	6	4	4	5	7	5	4	4	5	4	4	3	4	5	4	24	24	19.8	57.772	521	521;539	1	56	0	52.781	15.5	16.1	17.3
NP_001014793.1	NP_001014793.1	7	4	4	NP_001014793.1 importin subunit alpha-3 [Rattus norvegicus]	1	7	4	4	4	4	3	5	2	2	2	4	3	2	3	2	3	2	1	1	2	2	2	3	2	3	2	1	1	2	2	22.1	17.9	17.9	57.922	521	521	1	23	0	54.832	15	14.4	8.8
NP_001015005.2	NP_001015005.2	10	10	10	NP_001015005.2 probable ATP-dependent RNA helicase DDX47 [Rattus norvegicus]	1	10	10	10	4	1	2	2	3	4	3	4	1	4	1	2	2	3	4	3	4	1	4	1	2	2	3	4	3	4	1	29.5	29.5	29.5	50.696	455	455	1	24	0	28.803	14.5	4	6.2
NP_001015007.1	NP_001015007.1	1	1	1	NP_001015007.1 2-(3-amino-3-carboxypropyl)histidine synthase subunit 2 [Rattus norvegicus]	1	1	1	1	0	1	0	0	0	0	0	0	0	0	1	0	0	0	0	0	0	0	0	1	0	0	0	0	0	0	0	3.9	3.9	3.9	52.324	489	489	1	1	0.0024369	1.6026	0	3.9	0
NP_001015008.1	NP_001015008.1	3	3	3	NP_001015008.1 transcription elongation factor A protein 3 [Rattus norvegicus]	1	3	3	3	1	1	1	1	1	1	1	1	2	1	1	1	1	1	1	1	1	2	1	1	1	1	1	1	1	1	2	9.8	9.8	9.8	38.977	348	348	1	10	0	12.461	3.4	3.4	2.3
NP_001015018.1	NP_001015018.1	4	4	4	NP_001015018.1 probable ATP-dependent RNA helicase DDX17 [Rattus norvegicus]	1	4	4	4	3	3	1	3	3	3	3	3	3	3	3	1	3	3	3	3	3	3	3	3	1	3	3	3	3	3	3	18.7	18.7	18.7	28.876	268	268	1	35	0	45.677	15.7	15.7	4.5
NP_001015021.1	NP_001015021.1	12	12	12	NP_001015021.1 dnaJ homolog subfamily B member 11 precursor [Rattus norvegicus]	1	12	12	12	6	6	6	5	6	5	5	6	3	6	6	6	5	6	5	5	6	3	6	6	6	5	6	5	5	6	3	32.4	32.4	32.4	40.495	358	358	1	60	0	104	19.3	23.5	23.5
NP_001015029.2;XP_008771101.1;NP_001020284.1;XP_006256504.1	NP_001015029.2;XP_008771101.1;NP_001020284.1;XP_006256504.1	7;4;4;4	7;4;4;4	3;0;0;0	NP_001015029.2 importin subunit alpha-7 [Rattus norvegicus];XP_008771101.1 PREDICTED: importin subunit alpha-6 isoform X2 [Rattus norvegicus];NP_001020284.1 importin subunit alpha-6 [Rattus norvegicus];XP_006256504.1 PREDICTED: importin subunit alpha-6 iso	4	7	7	3	3	3	1	4	4	2	3	4	5	3	3	1	4	4	2	3	4	5	1	1	0	2	1	0	2	1	2	16.3	16.3	8.7	60.484	541	541;457;536;539	1	37	0	65.482	8.1	7.9	2.6
NP_001015030.1	NP_001015030.1	6	6	6	NP_001015030.1 ubiquitin-like protein 3 precursor [Rattus norvegicus]	1	6	6	6	1	1	0	1	3	4	2	2	3	1	1	0	1	3	4	2	2	3	1	1	0	1	3	4	2	2	3	57.3	57.3	57.3	13.18	117	117	1	17	0	9.5986	10.3	10.3	0
NP_001015037.1	NP_001015037.1	7	7	7	NP_001015037.1 kynurenine--oxoglutarate transaminase 3 [Rattus norvegicus]	1	7	7	7	5	5	4	3	4	3	3	4	4	5	5	4	3	4	3	3	4	4	5	5	4	3	4	3	3	4	4	22.5	22.5	22.5	51.044	454	454	1	42	0	23.541	18.1	17.2	15.4
NP_001017374.2;XP_017450861.1;XP_008756539.1	NP_001017374.2;XP_017450861.1;XP_008756539.1	22;18;15	22;18;15	22;18;15	NP_001017374.2 eukaryotic translation initiation factor 4 gamma 2 [Rattus norvegicus];XP_017450861.1 PREDICTED: eukaryotic translation initiation factor 4 gamma 2-like isoform X1 [Rattus norvegicus];XP_008756539.1 PREDICTED: LOW QUALITY PROTEIN: eukaryotic	3	22	22	22	13	12	11	13	11	11	9	14	11	13	12	11	13	11	11	9	14	11	13	12	11	13	11	11	9	14	11	27.8	27.8	27.8	102.15	906	906;700;687	1	119	0	173.21	17.9	14.9	14.9
NP_001017375.2	NP_001017375.2	2	2	2	NP_001017375.2 M-phase phosphoprotein 8 [Rattus norvegicus]	1	2	2	2	0	0	0	0	0	0	0	1	2	0	0	0	0	0	0	0	1	2	0	0	0	0	0	0	0	1	2	3.1	3.1	3.1	96.782	851	851	1	3	0.0098168	0.91036	0	0	0
NP_001017383.1;XP_008767114.1	NP_001017383.1;XP_008767114.1	3;2	3;2	3;2	NP_001017383.1 peptidyl-prolyl cis-trans isomerase-like 2 [Rattus norvegicus];XP_008767114.1 PREDICTED: peptidyl-prolyl cis-trans isomerase-like 2 isoform X1 [Rattus norvegicus]	2	3	3	3	0	0	0	0	3	0	0	0	0	0	0	0	0	3	0	0	0	0	0	0	0	0	3	0	0	0	0	7.3	7.3	7.3	59.027	521	521;420	1	3	0	4.4872	0	0	0
NP_001017463.1	NP_001017463.1	14	14	1	NP_001017463.1 UPF0505 protein C16orf62 homolog [Rattus norvegicus]	1	14	14	1	4	4	7	3	7	5	2	4	3	4	4	7	3	7	5	2	4	3	0	0	1	0	0	0	0	0	0	17.9	17.9	0.9	106.15	936	936	1	39	0	35.305	6	5.4	8.5
NP_001017487.1	NP_001017487.1	3	3	3	NP_001017487.1 BRI3-binding protein precursor [Rattus norvegicus]	1	3	3	3	2	0	1	2	2	2	2	2	2	2	0	1	2	2	2	2	2	2	2	0	1	2	2	2	2	2	2	13.8	13.8	13.8	28.316	253	253	1	18	0	101.95	11.1	0	7.5
NP_001017499.1	NP_001017499.1	12	12	12	NP_001017499.1 sec1 family domain-containing protein 2 [Rattus norvegicus]	1	12	12	12	9	4	3	2	4	3	3	3	3	9	4	3	2	4	3	3	3	3	9	4	3	2	4	3	3	3	3	27.8	27.8	27.8	74.794	684	684	1	39	0	29.59	21.2	8.2	6.4
NP_001017502.1	NP_001017502.1	1	1	1	NP_001017502.1 coiled-coil domain-containing protein 117 [Rattus norvegicus]	1	1	1	1	1	0	0	0	0	0	0	0	0	1	0	0	0	0	0	0	0	0	1	0	0	0	0	0	0	0	0	4.3	4.3	4.3	30.36	277	277	1	1	0	8.3035	4.3	0	0
NP_001017503.1;XP_006253297.1;XP_006253296.1;XP_017455673.1;NP_001178483.1;XP_017455672.1	NP_001017503.1	10;1;1;1;1;1	10;1;1;1;1;1	10;1;1;1;1;1	NP_001017503.1 transcriptional activator protein Pur-beta [Rattus norvegicus]	6	10	10	10	3	3	2	4	4	5	5	5	6	3	3	2	4	4	5	5	5	6	3	3	2	4	4	5	5	5	6	56.5	56.5	56.5	33.418	315	315;326;332;348;351;365	1	44	0	49.755	23.2	11.4	6
NP_001019403.1	NP_001019403.1	8	6	6	NP_001019403.1 cytochrome P450, family 3, subfamily a, polypeptide 62 [Rattus norvegicus]	1	8	6	6	1	0	1	2	4	5	2	5	4	1	0	1	2	3	4	1	4	3	1	0	1	2	3	4	1	4	3	18.3	14.5	14.5	57.009	497	497	1	20	0	4.9591	2.4	0	2.6
NP_001019404.2	NP_001019404.2	4	4	4	NP_001019404.2 UPF0696 protein C11orf68 homolog isoform 1 [Rattus norvegicus]	1	4	4	4	2	2	1	3	1	3	2	2	1	2	2	1	3	1	3	2	2	1	2	2	1	3	1	3	2	2	1	15.1	15.1	15.1	31.443	292	292	1	17	0	6.943	7.9	6.8	3.4
NP_001019406.2	NP_001019406.2	11	11	11	NP_001019406.2 E3 ubiquitin-protein ligase listerin [Rattus norvegicus]	1	11	11	11	4	3	1	2	0	2	4	6	4	4	3	1	2	0	2	4	6	4	4	3	1	2	0	2	4	6	4	8.6	8.6	8.6	199	1767	1767	1	28	0	24.087	3	2.5	1.1
NP_001019408.1	NP_001019408.1	17	17	17	NP_001019408.1 phenylalanine--tRNA ligase alpha subunit [Rattus norvegicus]	1	17	17	17	12	11	8	11	12	12	9	12	11	12	11	8	11	12	12	9	12	11	12	11	8	11	12	12	9	12	11	38.8	38.8	38.8	57.719	508	508	1	130	0	270.29	29.9	30.7	28.3
NP_001019411.1	NP_001019411.1	5	5	5	NP_001019411.1 marginal zone B- and B1-cell-specific protein precursor [Rattus norvegicus]	1	5	5	5	2	2	2	1	3	2	4	3	3	2	2	2	1	3	2	4	3	3	2	2	2	1	3	2	4	3	3	39.4	39.4	39.4	20.712	188	188	1	36	0	251.21	21.8	21.8	21.8
NP_001019414.1	NP_001019414.1	1	1	1	NP_001019414.1 diphosphoinositol polyphosphate phosphohydrolase 1 [Rattus norvegicus]	1	1	1	1	1	1	1	0	1	1	0	1	1	1	1	1	0	1	1	0	1	1	1	1	1	0	1	1	0	1	1	11.9	11.9	11.9	19.095	168	168	1	8	0	36.949	11.9	11.9	11.9
NP_001019418.1	NP_001019418.1	5	5	5	NP_001019418.1 endoribonuclease LACTB2 [Rattus norvegicus]	1	5	5	5	3	4	3	3	3	1	3	2	3	3	4	3	3	3	1	3	2	3	3	4	3	3	3	1	3	2	3	20.5	20.5	20.5	32.484	288	288	1	31	0	13.718	13.2	14.2	9.7
NP_001019421.1	NP_001019421.1	7	7	7	NP_001019421.1 ribosome biogenesis protein BOP1 [Rattus norvegicus]	1	7	7	7	1	0	1	1	2	2	3	2	4	1	0	1	1	2	2	3	2	4	1	0	1	1	2	2	3	2	4	16.4	16.4	16.4	82.639	731	731	1	16	0	9.2328	3.3	0	1.5
NP_001019425.1	NP_001019425.1	16	16	15	NP_001019425.1 serine/threonine-protein kinase TAO3 [Rattus norvegicus]	1	16	16	15	7	5	3	6	6	7	2	3	7	7	5	3	6	6	7	2	3	7	6	5	3	6	6	7	2	2	6	25.5	25.5	24.1	105.47	898	898	1	48	0	93.749	13.5	8.5	3.8
NP_001019427.1	NP_001019427.1	2	2	2	NP_001019427.1 mediator of RNA polymerase II transcription subunit 4 [Rattus norvegicus]	1	2	2	2	0	0	1	1	0	0	1	1	0	0	0	1	1	0	0	1	1	0	0	0	1	1	0	0	1	1	0	11.1	11.1	11.1	29.825	270	270	1	4	0	4.4368	0	0	6.3
NP_001019435.1	NP_001019435.1	1	1	1	NP_001019435.1 myeloblastin precursor [Rattus norvegicus]	1	1	1	1	0	0	0	0	0	1	0	0	0	0	0	0	0	0	1	0	0	0	0	0	0	0	0	1	0	0	0	5.1	5.1	5.1	27.682	254	254	1	1	0.003399	1.3544	0	0	0
NP_001019440.1;XP_017452858.1;XP_006246069.1;XP_006246068.1	NP_001019440.1;XP_017452858.1;XP_006246069.1;XP_006246068.1	5;5;5;5	3;3;3;3	3;3;3;3	NP_001019440.1 putative RNA-binding protein Luc7-like 1 [Rattus norvegicus];XP_017452858.1 PREDICTED: putative RNA-binding protein Luc7-like 1 isoform X2 [Rattus norvegicus];XP_006246069.1 PREDICTED: putative RNA-binding protein Luc7-like 1 isoform X2 [Rat	4	5	3	3	1	2	1	3	3	3	5	4	4	1	1	1	2	1	1	3	2	2	1	1	1	2	1	1	3	2	2	22.4	14.3	14.3	32.523	272	272;318;318;371	1	14	0	10.602	5.5	9.2	5.5
NP_001019441.2	NP_001019441.2	8	8	8	NP_001019441.2 proline-, glutamic acid- and leucine-rich protein 1 [Rattus norvegicus]	1	8	8	8	3	1	3	2	2	1	2	5	4	3	1	3	2	2	1	2	5	4	3	1	3	2	2	1	2	5	4	10.4	10.4	10.4	119.16	1130	1130	1	26	0	25.117	4.5	1	3.2
NP_001019444.1;XP_017456097.1;XP_017456096.1;XP_017456095.1;XP_017456094.1;XP_017456098.1	NP_001019444.1;XP_017456097.1;XP_017456096.1;XP_017456095.1;XP_017456094.1	9;6;6;6;6;4	9;6;6;6;6;4	9;6;6;6;6;4	NP_001019444.1 cytidine monophospho-N-acetylneuraminic acid hydroxylase, pseudogene [Rattus norvegicus];XP_017456097.1 PREDICTED: cytidine monophospho-N-acetylneuraminic acid hydroxylase isoform X1 [Rattus norvegicus];XP_017456096.1 PREDICTED: cytidine mon	6	9	9	9	3	2	3	4	4	3	4	2	1	3	2	3	4	4	3	4	2	1	3	2	3	4	4	3	4	2	1	16.8	16.8	16.8	66.892	577	577;531;531;531;531;474	1	27	0	20.739	7.3	5.9	7.6
NP_001019447.1	NP_001019447.1	4	4	4	NP_001019447.1 methyltransferase-like protein 7B precursor [Rattus norvegicus]	1	4	4	4	4	1	2	2	2	2	1	1	1	4	1	2	2	2	2	1	1	1	4	1	2	2	2	2	1	1	1	16.8	16.8	16.8	27.904	244	244	1	18	0	14.961	16.8	4.5	8.6
NP_001019448.1	NP_001019448.1	1	1	1	NP_001019448.1 2-amino-3-ketobutyrate coenzyme A ligase, mitochondrial [Rattus norvegicus]	1	1	1	1	1	1	0	0	0	1	0	0	1	1	1	0	0	0	1	0	0	1	1	1	0	0	0	1	0	0	1	3.4	3.4	3.4	45.223	416	416	1	4	0.0099673	0.89711	3.4	3.4	0
NP_001019466.1;XP_017457248.1	NP_001019466.1;XP_017457248.1	3;2	3;2	2;1	NP_001019466.1 small ubiquitin-related modifier 3 precursor [Rattus norvegicus];XP_017457248.1 PREDICTED: small ubiquitin-related modifier 3 isoform X1 [Rattus norvegicus]	2	3	3	2	2	0	1	0	1	1	0	2	2	2	0	1	0	1	1	0	2	2	1	0	0	0	0	0	0	1	1	22.7	22.7	11.8	12.456	110	110;118	1	14	0	6.5713	19.1	0	10.9
NP_001019475.1;XP_017446532.1	NP_001019475.1;XP_017446532.1	6;3	1;1	1;1	NP_001019475.1 glutathione S-transferase Mu 4 [Rattus norvegicus];XP_017446532.1 PREDICTED: glutathione S-transferase Mu 4 isoform X1 [Rattus norvegicus]	2	6	1	1	4	4	4	6	5	5	5	5	6	0	0	0	1	0	0	0	0	1	0	0	0	1	0	0	0	0	1	30.7	7.8	7.8	25.553	218	218;184	1	2	0.00055453	2.4324	18.8	18.8	18.8
NP_001019476.1;XP_008759643.1;XP_006233234.1	NP_001019476.1;XP_008759643.1;XP_006233234.1	3;2;2	3;2;2	3;2;2	NP_001019476.1 pre-mRNA-splicing factor 38B [Rattus norvegicus];XP_008759643.1 PREDICTED: pre-mRNA-splicing factor 38B isoform X1 [Rattus norvegicus];XP_006233234.1 PREDICTED: pre-mRNA-splicing factor 38B isoform X1 [Rattus norvegicus]	3	3	3	3	1	1	1	0	2	2	1	2	1	1	1	1	0	2	2	1	2	1	1	1	1	0	2	2	1	2	1	6.1	6.1	6.1	63.931	542	542;467;467	1	17	0	14.102	3.5	3.5	3.5
NP_001019477.1;XP_006232068.1	NP_001019477.1;XP_006232068.1	3;3	3;3	3;3	NP_001019477.1 H/ACA ribonucleoprotein complex subunit 1 [Rattus norvegicus];XP_006232068.1 PREDICTED: H/ACA ribonucleoprotein complex subunit 1 isoform X1 [Rattus norvegicus]	2	3	3	3	1	0	0	0	2	2	0	3	2	1	0	0	0	2	2	0	3	2	1	0	0	0	2	2	0	3	2	11.1	11.1	11.1	23.01	226	226;233	1	10	0.00071289	1.9114	3.1	0	0
NP_001019480.2	NP_001019480.2	2	2	2	NP_001019480.2 taperin [Rattus norvegicus]	1	2	2	2	0	0	0	2	2	1	1	1	0	0	0	0	2	2	1	1	1	0	0	0	0	2	2	1	1	1	0	2.9	2.9	2.9	80.271	753	753	1	7	0	8.8024	0	0	0
NP_001019485.1	NP_001019485.1	7	7	7	NP_001019485.1 monoacylglycerol lipase ABHD12 [Rattus norvegicus]	1	7	7	7	5	1	3	2	7	4	2	3	0	5	1	3	2	7	4	2	3	0	5	1	3	2	7	4	2	3	0	25.6	25.6	25.6	45.295	398	398	1	31	0	19.381	20.1	3.5	10.3
NP_001019499.1	NP_001019499.1	1	1	1	NP_001019499.1 GTPase, IMAP family member 7 [Rattus norvegicus]	1	1	1	1	0	0	0	0	0	0	0	0	1	0	0	0	0	0	0	0	0	1	0	0	0	0	0	0	0	0	1	4.1	4.1	4.1	33.394	293	293	1	1	0.0014082	1.7397	0	0	0
NP_001019502.1	NP_001019502.1	1	1	1	NP_001019502.1 ras-related protein Rab-43 [Rattus norvegicus]	1	1	1	1	1	1	1	1	0	0	0	0	1	1	1	1	1	0	0	0	0	1	1	1	1	1	0	0	0	0	1	6.7	6.7	6.7	23.229	210	210	1	5	0	13.782	6.7	6.7	6.7
NP_001019503.1	NP_001019503.1	6	3	3	NP_001019503.1 ADP-ribosylation factor-like protein 8B [Rattus norvegicus]	1	6	3	3	5	5	3	3	5	3	2	4	2	2	3	1	0	2	2	0	1	1	2	3	1	0	2	2	0	1	1	48.4	22	22	21.539	186	186	1	15	0	6.0497	44.6	43.5	26.3
NP_001019516.1;XP_008761902.1	NP_001019516.1;XP_008761902.1	45;38	45;38	3;3	NP_001019516.1 tropomyosin beta chain isoform Tpm2.1sm/cy [Rattus norvegicus];XP_008761902.1 PREDICTED: tropomyosin beta chain isoform X1 [Rattus norvegicus]	2	45	45	3	37	40	36	37	37	36	32	32	30	37	40	36	37	37	36	32	32	30	3	3	3	2	3	3	2	3	3	75.4	75.4	11.6	32.957	284	284;284	1	951	0	323.31	75.4	75.4	70.4
NP_001019858.1;XP_006247693.1	NP_001019858.1;XP_006247693.1	5;5	5;5	5;5	NP_001019858.1 C-type mannose receptor 2 precursor [Rattus norvegicus];XP_006247693.1 PREDICTED: C-type mannose receptor 2 isoform X1 [Rattus norvegicus]	2	5	5	5	3	2	4	2	2	2	1	1	3	3	2	4	2	2	2	1	1	3	3	2	4	2	2	2	1	1	3	5.3	5.3	5.3	167.02	1480	1480;1514	1	23	0	54.342	3.6	2.5	4.4
NP_001019914.1	NP_001019914.1	28	28	2	NP_001019914.1 UTP--glucose-1-phosphate uridylyltransferase [Rattus norvegicus]	1	28	28	2	21	12	13	18	13	15	19	14	16	21	12	13	18	13	15	19	14	16	1	1	1	1	0	0	1	1	2	61.4	61.4	5.9	57.023	508	508	1	220	0	323.31	54.3	38.4	40.9
NP_001019915.1	NP_001019915.1	6	6	6	NP_001019915.1 cell division cycle protein 16 homolog [Rattus norvegicus]	1	6	6	6	1	1	0	0	3	2	2	5	2	1	1	0	0	3	2	2	5	2	1	1	0	0	3	2	2	5	2	9.7	9.7	9.7	71.36	620	620	1	17	0	5.2903	1.3	1.6	0
NP_001019923.1	NP_001019923.1	5	5	5	NP_001019923.1 sorting nexin-15 [Rattus norvegicus]	1	5	5	5	2	0	2	1	0	1	1	0	0	2	0	2	1	0	1	1	0	0	2	0	2	1	0	1	1	0	0	31.4	31.4	31.4	37.905	338	338	1	7	0	4.7455	14.2	0	11.5
NP_001019925.1	NP_001019925.1	25	25	25	NP_001019925.1 GMP synthase [glutamine-hydrolyzing] [Rattus norvegicus]	1	25	25	25	9	13	8	12	13	10	9	14	12	9	13	8	12	13	10	9	14	12	9	13	8	12	13	10	9	14	12	51.5	51.5	51.5	76.757	693	693	1	129	0	235.37	24.5	30.6	20.8
NP_001019940.1	NP_001019940.1	7	7	7	NP_001019940.1 parafibromin [Rattus norvegicus]	1	7	7	7	3	2	1	3	2	4	3	4	2	3	2	1	3	2	4	3	4	2	3	2	1	3	2	4	3	4	2	15.6	15.6	15.6	60.602	531	531	1	33	0	31.89	7.7	5.3	3.8
NP_001019951.1	NP_001019951.1	7	7	7	NP_001019951.1 interferon-inducible double-stranded RNA-dependent protein kinase activator A [Rattus norvegicus]	1	7	7	7	5	3	3	4	4	2	2	2	4	5	3	3	4	4	2	2	2	4	5	3	3	4	4	2	2	2	4	30.4	30.4	30.4	34.355	313	313	1	33	0	57.578	24.3	16.9	15
NP_001019971.1;XP_006240240.1	NP_001019971.1;XP_006240240.1	5;5	5;5	5;5	NP_001019971.1 thioredoxin-related transmembrane protein 1 precursor [Rattus norvegicus];XP_006240240.1 PREDICTED: thioredoxin-related transmembrane protein 1 isoform X1 [Rattus norvegicus]	2	5	5	5	2	1	1	3	2	2	3	4	4	2	1	1	3	2	2	3	4	4	2	1	1	3	2	2	3	4	4	19.1	19.1	19.1	31.434	278	278;298	1	25	0	24.444	11.9	4.3	4.3
NP_001019972.1	NP_001019972.1	13	13	13	NP_001019972.1 centromere/kinetochore protein zw10 homolog [Rattus norvegicus]	1	13	13	13	7	2	1	5	4	3	4	5	8	7	2	1	5	4	3	4	5	8	7	2	1	5	4	3	4	5	8	23.2	23.2	23.2	87.966	777	777	1	45	0	151.41	15.2	4.1	2.1
NP_001019973.1	NP_001019973.1	3	3	3	NP_001019973.1 transmembrane protein 165 precursor [Rattus norvegicus]	1	3	3	3	1	2	2	0	3	3	0	3	2	1	2	2	0	3	3	0	3	2	1	2	2	0	3	3	0	3	2	19.2	19.2	19.2	34.809	323	323	1	17	0	56.067	5.6	11.5	11.5
NP_001020036.1	NP_001020036.1	5	5	5	NP_001020036.1 39S ribosomal protein L40, mitochondrial precursor [Rattus norvegicus]	1	5	5	5	1	5	1	1	2	1	0	2	2	1	5	1	1	2	1	0	2	2	1	5	1	1	2	1	0	2	2	33.5	33.5	33.5	24.397	206	206	1	21	0	32.396	7.8	33.5	7.8
NP_001020037.1;XP_006251660.1	NP_001020037.1;XP_006251660.1	2;1	2;1	2;1	NP_001020037.1 cilia- and flagella-associated protein 36 [Rattus norvegicus];XP_006251660.1 PREDICTED: cilia- and flagella-associated protein 36 isoform X1 [Rattus norvegicus]	2	2	2	2	2	1	1	0	0	0	0	1	0	2	1	1	0	0	0	0	1	0	2	1	1	0	0	0	0	1	0	8.5	8.5	8.5	39.59	343	343;309	1	5	0.00055648	2.4771	8.5	5.5	5.5
NP_001020041.1	NP_001020041.1	7	7	7	NP_001020041.1 beta-catenin-like protein 1 [Rattus norvegicus]	1	7	7	7	3	4	1	3	5	4	4	5	7	3	4	1	3	5	4	4	5	7	3	4	1	3	5	4	4	5	7	10.1	10.1	10.1	64.947	563	563	1	36	0	6.3783	4.3	5.5	1.4
NP_001020056.1	NP_001020056.1	8	8	8	NP_001020056.1 coiled-coil domain-containing protein 90B, mitochondrial precursor [Rattus norvegicus]	1	8	8	8	4	3	2	5	3	3	3	1	3	4	3	2	5	3	3	3	1	3	4	3	2	5	3	3	3	1	3	38.7	38.7	38.7	29.8	256	256	1	29	0	28.065	26.2	20.7	13.3
NP_001020068.1	NP_001020068.1	27	26	23	NP_001020068.1 EH domain-containing protein 2 [Rattus norvegicus]	1	27	26	23	22	21	21	15	25	22	19	23	21	21	20	20	14	24	21	18	22	20	20	18	19	14	22	21	18	21	20	57.8	56.2	52.7	61.237	543	543	1	295	0	323.31	48.8	48.6	50.1
NP_001020069.1	NP_001020069.1	9	9	9	NP_001020069.1 RNA polymerase II-associated factor 1 homolog [Rattus norvegicus]	1	9	9	9	2	0	0	0	2	1	3	3	6	2	0	0	0	2	1	3	3	6	2	0	0	0	2	1	3	3	6	20.2	20.2	20.2	60.546	535	535	1	18	0	13.402	4.9	0	0
NP_001020141.2	NP_001020141.2	4	4	4	NP_001020141.2 replication stress response regulator SDE2 [Rattus norvegicus]	1	4	4	4	0	0	1	0	1	1	2	2	2	0	0	1	0	1	1	2	2	2	0	0	1	0	1	1	2	2	2	5.6	5.6	5.6	48.083	448	448	1	10	0	8.7712	0	0	2.9
NP_001020161.2;XP_008765787.1	NP_001020161.2;XP_008765787.1	6;6	6;6	6;6	NP_001020161.2 N-acetylglucosamine-6-phosphate deacetylase [Rattus norvegicus];XP_008765787.1 PREDICTED: N-acetylglucosamine-6-phosphate deacetylase isoform X1 [Rattus norvegicus]	2	6	6	6	3	1	2	4	2	3	3	1	3	3	1	2	4	2	3	3	1	3	3	1	2	4	2	3	3	1	3	21.3	21.3	21.3	43.538	409	409;465	1	23	0	26.887	10.8	2.7	8.1
NP_001020162.1	NP_001020162.1	7	7	7	NP_001020162.1 acylpyruvase FAHD1, mitochondrial [Rattus norvegicus]	1	7	7	7	4	4	2	4	5	5	6	5	4	4	4	2	4	5	5	6	5	4	4	4	2	4	5	5	6	5	4	31.7	31.7	31.7	24.48	221	221	1	52	0	61.716	24.4	24.4	13.6
NP_001020164.1;XP_017452806.1	NP_001020164.1;XP_017452806.1	10;10	10;10	10;10	NP_001020164.1 SWI/SNF-related matrix-associated actin-dependent regulator of chromatin subfamily E member 1 [Rattus norvegicus];XP_017452806.1 PREDICTED: SWI/SNF-related matrix-associated actin-dependent regulator of chromatin subfamily E member 1 isoform	2	10	10	10	4	3	5	5	5	5	3	4	5	4	3	5	5	5	5	3	4	5	4	3	5	5	5	5	3	4	5	30.9	30.9	30.9	42.831	376	376;456	1	42	0	71.248	15.2	10.4	15.7
NP_001020167.1	NP_001020167.1	1	1	1	NP_001020167.1 metallo-beta-lactamase domain-containing protein 1 [Rattus norvegicus]	1	1	1	1	1	0	0	0	0	1	0	0	1	1	0	0	0	0	1	0	0	1	1	0	0	0	0	1	0	0	1	6.8	6.8	6.8	26.137	251	251	1	3	0.0027581	1.5052	6.8	0	0
NP_001020168.1;XP_008767678.1	NP_001020168.1;XP_008767678.1	14;14	14;14	14;14	NP_001020168.1 coiled-coil domain-containing protein 93 [Rattus norvegicus];XP_008767678.1 PREDICTED: coiled-coil domain-containing protein 93 isoform X1 [Rattus norvegicus]	2	14	14	14	5	6	4	4	7	5	6	6	3	5	6	4	4	7	5	6	6	3	5	6	4	4	7	5	6	6	3	28.1	28.1	28.1	72.635	629	629;635	1	52	0	120.82	9.7	12.9	8.3
NP_001020169.1;XP_008769719.1	NP_001020169.1;XP_008769719.1	1;1	1;1	1;1	NP_001020169.1 thioredoxin domain-containing protein 15 precursor [Rattus norvegicus];XP_008769719.1 PREDICTED: thioredoxin domain-containing protein 15 isoform X1 [Rattus norvegicus]	2	1	1	1	0	1	1	0	1	0	0	1	0	0	1	1	0	1	0	0	1	0	0	1	1	0	1	0	0	1	0	3.5	3.5	3.5	37.927	343	343;345	1	4	0	6.4041	0	3.5	3.5
NP_001020181.1	NP_001020181.1	13	13	13	NP_001020181.1 NLR family member X1 precursor [Rattus norvegicus]	1	13	13	13	4	6	6	5	7	5	4	5	4	4	6	6	5	7	5	4	5	4	4	6	6	5	7	5	4	5	4	16.8	16.8	16.8	107.59	973	973	1	46	0	25.43	5.3	9.5	8.1
NP_001020194.1;XP_017448980.1	NP_001020194.1;XP_017448980.1	2;2	2;2	2;2	NP_001020194.1 nucleoporin NDC1 [Rattus norvegicus];XP_017448980.1 PREDICTED: nucleoporin NDC1 isoform X1 [Rattus norvegicus]	2	2	2	2	0	0	0	0	0	1	0	2	0	0	0	0	0	0	1	0	2	0	0	0	0	0	0	1	0	2	0	5.5	5.5	5.5	75.712	673	673;696	1	3	0.00055016	2.3069	0	0	0
NP_001020197.1	NP_001020197.1	3	3	3	NP_001020197.1 signal-transducing adaptor protein 2 [Rattus norvegicus]	1	3	3	3	0	0	0	1	2	0	1	1	1	0	0	0	1	2	0	1	1	1	0	0	0	1	2	0	1	1	1	8.7	8.7	8.7	42.767	380	380	1	6	0	4.191	0	0	0
NP_001020198.1	NP_001020198.1	1	1	1	NP_001020198.1 FUN14 domain-containing protein 1 [Rattus norvegicus]	1	1	1	1	1	1	1	0	1	1	0	0	0	1	1	1	0	1	1	0	0	0	1	1	1	0	1	1	0	0	0	11	11	11	17.158	155	155	1	6	0	6.5815	11	11	11
NP_001020226.1	NP_001020226.1	14	14	14	NP_001020226.1 NXPE family member 4 precursor [Rattus norvegicus]	1	14	14	14	8	6	9	8	7	9	5	9	6	8	6	9	8	7	9	5	9	6	8	6	9	8	7	9	5	9	6	31.9	31.9	31.9	61.615	542	542	1	79	0	76.698	22	14.8	21.6
NP_001020291.1	NP_001020291.1	3	3	3	NP_001020291.1 general transcription factor 3C polypeptide 2 [Rattus norvegicus]	1	3	3	3	0	0	0	0	1	1	2	1	0	0	0	0	0	1	1	2	1	0	0	0	0	0	1	1	2	1	0	5.3	5.3	5.3	104.93	951	951	1	5	0.00020198	3.7255	0	0	0
NP_001020294.3;XP_017451130.1	NP_001020294.3;XP_017451130.1	10;7	10;7	10;7	NP_001020294.3 KDEL motif-containing protein 2 precursor [Rattus norvegicus];XP_017451130.1 PREDICTED: KDEL motif-containing protein 2 isoform X1 [Rattus norvegicus]	2	10	10	10	4	4	3	3	6	5	4	3	6	4	4	3	3	6	5	4	3	6	4	4	3	3	6	5	4	3	6	24.6	24.6	24.6	58.701	508	508;403	1	44	0	54.605	11.4	10.2	10.4
NP_001020296.2	NP_001020296.2	1	1	1	NP_001020296.2 sulfatase-modifying factor 2 precursor [Rattus norvegicus]	1	1	1	1	0	0	1	0	0	0	1	0	0	0	0	1	0	0	0	1	0	0	0	0	1	0	0	0	1	0	0	4.9	4.9	4.9	34.651	307	307	1	2	0.00055597	2.473	0	0	4.9
NP_001020298.1;XP_008768270.1;XP_008768269.1;XP_006250846.1;XP_008768268.1;XP_006250845.1;XP_006250844.1;XP_006250843.1;XP_017454775.1;XP_017454774.1;XP_008768267.1;XP_008768266.1;XP_017454773.1;XP_017454772.1	NP_001020298.1;XP_008768270.1;XP_008768269.1;XP_006250846.1;XP_008768268.1;XP_006250845.1;XP_006250844.1;XP_006250843.1;XP_017454775.1;XP_017454774.1;XP_008768267.1;XP_008768266.1;XP_017454773.1;XP_017454772.1	5;5;5;5;5;5;5;5;5;5;5;5;5;5	4;4;4;4;4;4;4;4;4;4;4;4;4;4	4;4;4;4;4;4;4;4;4;4;4;4;4;4	NP_001020298.1 protein RUFY3 [Rattus norvegicus];XP_008768270.1 PREDICTED: protein RUFY3 isoform X12 [Rattus norvegicus];XP_008768269.1 PREDICTED: protein RUFY3 isoform X11 [Rattus norvegicus];XP_006250846.1 PREDICTED: protein RUFY3 isoform X10 [Rattus nor	14	5	4	4	1	0	1	2	0	1	3	1	2	1	0	1	1	0	1	2	1	2	1	0	1	1	0	1	2	1	2	10.9	9.2	9.2	52.906	469	469;487;519;597;617;619;622;626;644;644;669;676;687;694	1	10	0	6.2992	2.3	0	2.3
NP_001020307.1	NP_001020307.1	5	5	5	NP_001020307.1 protein HEXIM1 [Rattus norvegicus]	1	5	5	5	2	0	0	0	1	1	1	3	2	2	0	0	0	1	1	1	3	2	2	0	0	0	1	1	1	3	2	15.7	15.7	15.7	40.317	356	356	1	13	0	19.624	4.8	0	0
NP_001020311.2;XP_008768689.1	NP_001020311.2;XP_008768689.1	10;10	10;10	10;10	NP_001020311.2 proteasome activator complex subunit 4 [Rattus norvegicus];XP_008768689.1 PREDICTED: proteasome activator complex subunit 4 isoform X1 [Rattus norvegicus]	2	10	10	10	3	2	5	1	3	2	2	5	4	3	2	5	1	3	2	2	5	4	3	2	5	1	3	2	2	5	4	7.4	7.4	7.4	211.18	1843	1843;1865	1	27	0	25.998	2.2	1.2	3.4
NP_001020317.1	NP_001020317.1	7	7	7	NP_001020317.1 NADH dehydrogenase [ubiquinone] iron-sulfur protein 4, mitochondrial precursor [Rattus norvegicus]	1	7	7	7	4	3	3	5	3	4	4	3	4	4	3	3	5	3	4	4	3	4	4	3	3	5	3	4	4	3	4	45.7	45.7	45.7	19.74	175	175	1	50	0	31.217	28.6	28.6	14.3
NP_001020442.1	NP_001020442.1	25	25	24	NP_001020442.1 splicing factor, proline- and glutamine-rich [Rattus norvegicus]	1	25	25	24	11	8	8	16	14	15	13	15	18	11	8	8	16	14	15	13	15	18	10	7	7	15	13	14	12	14	17	46.5	46.5	45.4	75.486	699	699	1	184	0	301.03	20.3	18.3	17.5
NP_001020446.1	NP_001020446.1	14	14	12	NP_001020446.1 UV excision repair protein RAD23 homolog B [Rattus norvegicus]	1	14	14	12	7	5	6	6	7	9	5	7	7	7	5	6	6	7	9	5	7	7	6	5	6	5	7	9	4	7	7	48.7	48.7	44.6	43.496	415	415	1	85	0	294.82	25.5	20	24.8
NP_001020572.1	NP_001020572.1	9	9	9	NP_001020572.1 nuclear pore complex protein Nup85 [Rattus norvegicus]	1	9	9	9	3	4	4	2	3	2	4	3	2	3	4	4	2	3	2	4	3	2	3	4	4	2	3	2	4	3	2	15.9	15.9	15.9	74.881	656	656	1	31	0	62.371	7	9.5	6.7
NP_001020573.1	NP_001020573.1	15	15	15	NP_001020573.1 uridine 5-monophosphate synthase [Rattus norvegicus]	1	15	15	15	4	10	5	6	6	5	8	9	7	4	10	5	6	6	5	8	9	7	4	10	5	6	6	5	8	9	7	37.2	37.2	37.2	52.378	481	481	1	76	0	53.003	14.1	27	12.7
NP_001020576.2;XP_006229091.1	NP_001020576.2;XP_006229091.1	19;18	19;18	19;18	NP_001020576.2 ruvB-like 2 [Rattus norvegicus];XP_006229091.1 PREDICTED: ruvB-like 2 isoform X1 [Rattus norvegicus]	2	19	19	19	10	6	5	10	9	8	10	9	6	10	6	5	10	9	8	10	9	6	10	6	5	10	9	8	10	9	6	46.4	46.4	46.4	51.112	463	463;492	1	83	0	85.706	24.4	18.6	15.1
NP_001020577.1;XP_008759135.1	NP_001020577.1;XP_008759135.1	3;3	3;3	3;3	NP_001020577.1 exosome complex component RRP45 [Rattus norvegicus];XP_008759135.1 PREDICTED: exosome complex component RRP45 isoform X1 [Rattus norvegicus]	2	3	3	3	1	1	1	1	1	1	0	1	1	1	1	1	1	1	1	0	1	1	1	1	1	1	1	1	0	1	1	7.6	7.6	7.6	48.881	437	437;456	1	8	0	8.0549	2.3	2.7	2.3
NP_001020579.1	NP_001020579.1	3	3	3	NP_001020579.1 28S ribosomal protein S25, mitochondrial [Rattus norvegicus]	1	3	3	3	0	1	1	2	2	1	3	1	2	0	1	1	2	2	1	3	1	2	0	1	1	2	2	1	3	1	2	21.6	21.6	21.6	19.775	171	171	1	13	0	22.098	0	9.9	9.9
NP_001020580.1;NP_445898.1	NP_001020580.1;NP_445898.1	11;8	11;8	7;4	NP_001020580.1 histone deacetylase 1 [Rattus norvegicus];NP_445898.1 histone deacetylase 1-like [Rattus norvegicus]	2	11	11	7	8	6	7	8	8	6	8	9	9	8	6	7	8	8	6	8	9	9	6	4	5	5	6	4	4	6	6	34.4	34.4	25.1	55.092	482	482;484	1	98	0	194.4	26.6	18.3	25.1
NP_001020581.1	NP_001020581.1	3	3	3	NP_001020581.1 charged multivesicular body protein 5 [Rattus norvegicus]	1	3	3	3	2	2	2	2	2	1	1	2	2	2	2	2	2	2	1	1	2	2	2	2	2	2	2	1	1	2	2	23.7	23.7	23.7	24.575	219	219	1	16	0	14.71	20.5	11.4	20.5
NP_001020582.1	NP_001020582.1	10	10	10	NP_001020582.1 dnaJ homolog subfamily A member 4 [Rattus norvegicus]	1	10	10	10	8	6	9	1	4	4	2	4	4	8	6	9	1	4	4	2	4	4	8	6	9	1	4	4	2	4	4	26.7	26.7	26.7	61.875	555	555	1	53	0	46.961	22.9	16.4	26.5
NP_001020585.1	NP_001020585.1	17	17	15	NP_001020585.1 histidine--tRNA ligase, cytoplasmic [Rattus norvegicus]	1	17	17	15	8	13	13	11	9	10	11	10	8	8	13	13	11	9	10	11	10	8	7	13	12	10	8	8	10	9	7	33.1	33.1	29.5	57.36	508	508	1	110	0	153.59	19.7	29.1	26.8
NP_001020589.1;XP_017451116.1;XP_017451115.1	NP_001020589.1;XP_017451116.1;XP_017451115.1	13;13;13	9;9;9	9;9;9	NP_001020589.1 serine/threonine-protein phosphatase 2A 65 kDa regulatory subunit A beta isoform [Rattus norvegicus];XP_017451116.1 PREDICTED: serine/threonine-protein phosphatase 2A 65 kDa regulatory subunit A beta isoform isoform X2 [Rattus norvegicus];XP	3	13	9	9	7	10	6	6	6	7	6	9	8	4	7	3	3	3	4	4	6	5	4	7	3	3	3	4	4	6	5	26.1	19.8	19.8	66.006	601	601;658;694	1	48	0	53.438	16	21.1	13.6
NP_001020595.1	NP_001020595.1	4	4	4	NP_001020595.1 ubiquitin carboxyl-terminal hydrolase 3 [Rattus norvegicus]	1	4	4	4	2	1	1	2	1	2	2	1	2	2	1	1	2	1	2	2	1	2	2	1	1	2	1	2	2	1	2	9.2	9.2	9.2	58.906	520	520	1	18	0.00019451	3.0863	4.4	2.9	2.9
NP_001020794.1	NP_001020794.1	3	3	3	NP_001020794.1 pantetheinase precursor [Rattus norvegicus]	1	3	3	3	2	1	0	0	0	0	0	0	0	2	1	0	0	0	0	0	0	0	2	1	0	0	0	0	0	0	0	12.3	12.3	12.3	57.013	512	512	1	3	0	10.733	9.8	2.5	0
NP_001020796.2	NP_001020796.2	9	9	9	NP_001020796.2 E3 ubiquitin-protein ligase CHIP [Rattus norvegicus]	1	9	9	9	2	6	3	5	4	5	6	5	5	2	6	3	5	4	5	6	5	5	2	6	3	5	4	5	6	5	5	34.2	34.2	34.2	34.886	304	304	1	44	0	88.961	8.9	25	13.2
NP_001020801.1	NP_001020801.1	1	1	1	NP_001020801.1 ADP-ribosylation factor-like protein 6-interacting protein 4 [Rattus norvegicus]	1	1	1	1	1	1	1	0	0	0	0	0	0	1	1	1	0	0	0	0	0	0	1	1	1	0	0	0	0	0	0	6.9	6.9	6.9	25.769	231	231	1	3	0	15.698	6.9	6.9	6.9
NP_001020806.2;XP_006254906.1;NP_001136421.1	NP_001020806.2;XP_006254906.1;NP_001136421.1	14;14;12	14;14;12	14;14;12	NP_001020806.2 asparagine--tRNA ligase, cytoplasmic isoform 1 [Rattus norvegicus];XP_006254906.1 PREDICTED: asparagine--tRNA ligase, cytoplasmic isoform X1 [Rattus norvegicus];NP_001136421.1 asparagine--tRNA ligase, cytoplasmic isoform 2 [Rattus norvegicus	3	14	14	14	9	11	12	6	11	12	6	13	12	9	11	12	6	11	12	6	13	12	9	11	12	6	11	12	6	13	12	25.3	25.3	25.3	64.127	558	558;559;507	1	123	0	280.43	22.4	22.4	22.6
NP_001020808.1	NP_001020808.1	10	10	10	NP_001020808.1 proteasome subunit beta type-10 [Rattus norvegicus]	1	10	10	10	4	5	4	4	5	4	6	4	5	4	5	4	4	5	4	6	4	5	4	5	4	4	5	4	6	4	5	49.8	49.8	49.8	29.038	273	273	1	47	0	115.77	19	34.4	22.7
NP_001020814.1	NP_001020814.1	11	11	10	NP_001020814.1 rRNA 2-O-methyltransferase fibrillarin [Rattus norvegicus]	1	11	11	10	8	6	7	8	7	6	7	5	5	8	6	7	8	7	6	7	5	5	7	5	6	7	6	5	6	4	4	45	45	41.6	34.221	327	327	1	101	0	126.75	31.8	26.3	36.4
NP_001020820.1;XP_006235346.1	NP_001020820.1;XP_006235346.1	11;11	11;11	11;11	NP_001020820.1 transmembrane 9 superfamily member 4 precursor [Rattus norvegicus];XP_006235346.1 PREDICTED: transmembrane 9 superfamily member 4 isoform X1 [Rattus norvegicus]	2	11	11	11	5	5	4	4	8	7	6	7	7	5	5	4	4	8	7	6	7	7	5	5	4	4	8	7	6	7	7	15.6	15.6	15.6	74.674	643	643;644	1	88	0	207.21	11.2	9.8	8.4
NP_001020822.1;XP_006239075.1	NP_001020822.1;XP_006239075.1	1;1	1;1	1;1	NP_001020822.1 synaptotagmin-like protein 1 [Rattus norvegicus];XP_006239075.1 PREDICTED: synaptotagmin-like protein 1 isoform X1 [Rattus norvegicus]	2	1	1	1	0	0	0	1	0	0	0	1	1	0	0	0	1	0	0	0	1	1	0	0	0	1	0	0	0	1	1	2	2	2	59.471	544	544;562	1	3	0.0032385	1.3782	0	0	0
NP_001020826.1	NP_001020826.1	12	12	12	NP_001020826.1 UMP-CMP kinase [Rattus norvegicus]	1	12	12	12	10	8	9	9	11	11	10	10	10	10	8	9	9	11	11	10	10	10	10	8	9	9	11	11	10	10	10	48.9	48.9	48.9	25.833	227	227	1	185	0	323.31	44.1	34.8	34.8
NP_001020828.1	NP_001020828.1	2	2	2	NP_001020828.1 RNA polymerase II subunit A C-terminal domain phosphatase SSU72 [Rattus norvegicus]	1	2	2	2	1	1	1	0	1	1	1	2	0	1	1	1	0	1	1	1	2	0	1	1	1	0	1	1	1	2	0	13.9	13.9	13.9	22.544	194	194	1	8	0	4.0391	6.2	6.2	6.2
NP_001020832.1	NP_001020832.1	1	1	1	NP_001020832.1 protein crumbs homolog 3 precursor [Rattus norvegicus]	1	1	1	1	0	0	0	0	1	1	0	1	1	0	0	0	0	1	1	0	1	1	0	0	0	0	1	1	0	1	1	14.9	14.9	14.9	12.057	114	114	1	4	0.00019928	3.4733	0	0	0
NP_001020838.1;XP_006250053.1;XP_006250052.1	NP_001020838.1;XP_006250053.1;XP_006250052.1	3;3;3	3;3;3	2;2;2	NP_001020838.1 E3 ubiquitin-protein ligase RING2 [Rattus norvegicus];XP_006250053.1 PREDICTED: E3 ubiquitin-protein ligase RING2 isoform X1 [Rattus norvegicus];XP_006250052.1 PREDICTED: E3 ubiquitin-protein ligase RING2 isoform X1 [Rattus norvegicus]	3	3	3	2	3	2	1	1	1	1	2	1	1	3	2	1	1	1	1	2	1	1	2	1	0	0	1	0	1	0	1	12.3	12.3	7.8	34.242	308	308;336;336	1	15	0	15.553	12.3	10.1	4.5
NP_001020846.1	NP_001020846.1	21	11	9	NP_001020846.1 tubulin beta-6 chain [Rattus norvegicus]	1	21	11	9	19	19	18	20	18	18	15	18	16	9	9	8	11	8	8	6	8	6	7	7	6	9	6	6	4	6	4	57.3	37.4	32.2	50.059	447	447	1	104	0	259.96	54.8	54.6	51.9
NP_001020847.1;XP_017456443.1	NP_001020847.1;XP_017456443.1	5;5	5;5	5;5	NP_001020847.1 pre-mRNA-splicing factor RBM22 [Rattus norvegicus];XP_017456443.1 PREDICTED: pre-mRNA-splicing factor RBM22 isoform X1 [Rattus norvegicus]	2	5	5	5	1	2	2	1	2	1	2	0	2	1	2	2	1	2	1	2	0	2	1	2	2	1	2	1	2	0	2	15	15	15	46.863	420	420;448	1	17	0	18.408	1.7	8.6	8.6
NP_001020857.1	NP_001020857.1	8	8	8	NP_001020857.1 vesicle-trafficking protein SEC22b precursor [Rattus norvegicus]	1	8	8	8	6	3	4	6	6	5	6	6	6	6	3	4	6	6	5	6	6	6	6	3	4	6	6	5	6	6	6	51.6	51.6	51.6	24.74	215	215	1	61	0	84.909	42.3	20.9	29.8
NP_001020860.1	NP_001020860.1	8	8	8	NP_001020860.1 26S proteasome non-ATPase regulatory subunit 14 [Rattus norvegicus]	1	8	8	8	5	6	7	5	6	7	6	7	7	5	6	7	5	6	7	6	7	7	5	6	7	5	6	7	6	7	7	50	50	50	34.577	310	310	1	71	0	124.96	32.3	38.7	42.9
NP_001020866.1;XP_006237820.1	NP_001020866.1;XP_006237820.1	12;10	12;10	12;10	NP_001020866.1 COP9 signalosome complex subunit 5 [Rattus norvegicus];XP_006237820.1 PREDICTED: COP9 signalosome complex subunit 5 isoform X1 [Rattus norvegicus]	2	12	12	12	7	8	7	3	9	6	2	5	6	7	8	7	3	9	6	2	5	6	7	8	7	3	9	6	2	5	6	50.9	50.9	50.9	37.578	334	334;317	1	68	0	100.58	32.3	35	30.8
NP_001020867.2	NP_001020867.2	30	30	30	NP_001020867.2 tyrosine--tRNA ligase, cytoplasmic [Rattus norvegicus]	1	30	30	30	10	17	15	11	13	11	16	19	15	10	17	15	11	13	11	16	19	15	10	17	15	11	13	11	16	19	15	50.9	50.9	50.9	63.025	564	564	1	136	0	82.697	23.6	32.8	33.3
NP_001020868.1;XP_017448849.1	NP_001020868.1;XP_017448849.1	10;5	10;5	10;5	NP_001020868.1 hydroxysteroid dehydrogenase-like protein 2 [Rattus norvegicus];XP_017448849.1 PREDICTED: hydroxysteroid dehydrogenase-like protein 2 isoform X1 [Rattus norvegicus]	2	10	10	10	6	1	3	6	2	5	5	4	5	6	1	3	6	2	5	5	4	5	6	1	3	6	2	5	5	4	5	26	26	26	58.343	524	524;404	1	41	0	49.18	15.8	3.6	9.7
NP_001020869.1	NP_001020869.1	13	13	13	NP_001020869.1 splicing factor 3A subunit 3 [Rattus norvegicus]	1	13	13	13	8	9	7	6	7	8	9	9	8	8	9	7	6	7	8	9	9	8	8	9	7	6	7	8	9	9	8	26.5	26.5	26.5	58.841	501	501	1	83	0	174.08	18.6	18.4	20.4
NP_001020872.1	NP_001020872.1	13	13	12	NP_001020872.1 double-strand-break repair protein rad21 homolog [Rattus norvegicus]	1	13	13	12	3	5	4	4	5	4	4	7	8	3	5	4	4	5	4	4	7	8	3	5	3	4	5	4	4	7	7	27.1	27.1	25.4	71.991	635	635	1	53	0	42.147	7.2	9.6	7.1
NP_001020880.1	NP_001020880.1	8	8	8	NP_001020880.1 phosducin-like protein 3 [Rattus norvegicus]	1	8	8	8	5	3	3	2	4	2	1	2	2	5	3	3	2	4	2	1	2	2	5	3	3	2	4	2	1	2	2	34.2	34.2	34.2	27.699	240	240	1	27	0	26.681	22.1	16.7	19.2
NP_001020885.1	NP_001020885.1	2	2	2	NP_001020885.1 biogenesis of lysosome-related organelles complex 1 subunit 6 [Rattus norvegicus]	1	2	2	2	1	1	0	0	0	1	0	0	0	1	1	0	0	0	1	0	0	0	1	1	0	0	0	1	0	0	0	23.8	23.8	23.8	19.702	172	172	1	3	0	10.24	11	12.8	0
NP_001020887.1;XP_008768483.1;XP_006251539.1;XP_006251538.1;NP_001011913.1	NP_001020887.1	18;1;1;1;1	18;1;1;1;1	13;0;0;0;0	NP_001020887.1 vacuolar protein sorting-associated protein 4B [Rattus norvegicus]	5	18	18	13	10	10	11	12	10	10	10	9	8	10	10	11	12	10	10	10	9	8	6	8	9	8	7	7	7	7	6	39.2	39.2	32	49.451	444	444;677;677;677;677	1	115	0	228.65	26.6	28.2	29.5
NP_001020888.1	NP_001020888.1	6	6	6	NP_001020888.1 actin-related protein 2/3 complex subunit 5 [Rattus norvegicus]	1	6	6	6	4	4	4	4	5	4	4	4	4	4	4	4	4	5	4	4	4	4	4	4	4	4	5	4	4	4	4	43.7	43.7	43.7	16.32	151	151	1	59	0	100.79	33.8	39.1	39.1
NP_001020890.1;XP_006253903.1	NP_001020890.1;XP_006253903.1	1;1	1;1	1;1	NP_001020890.1 PX domain-containing protein 1 [Rattus norvegicus];XP_006253903.1 PREDICTED: PX domain-containing protein 1 isoform X1 [Rattus norvegicus]	2	1	1	1	0	1	1	0	0	0	0	0	0	0	1	1	0	0	0	0	0	0	0	1	1	0	0	0	0	0	0	6.9	6.9	6.9	26.359	231	231;251	1	2	0.00020092	3.6163	0	6.9	6.9
NP_001020891.1	NP_001020891.1	5	5	5	NP_001020891.1 probable 2-oxoglutarate dehydrogenase E1 component DHKTD1, mitochondrial [Rattus norvegicus]	1	5	5	5	3	3	4	1	0	1	1	0	0	3	3	4	1	0	1	1	0	0	3	3	4	1	0	1	1	0	0	11.2	11.2	11.2	102.64	920	920	1	13	0	16.445	5.3	7.7	9.6
NP_001020892.1;XP_017456476.1	NP_001020892.1;XP_017456476.1	5;5	5;5	5;5	NP_001020892.1 collectin-12 [Rattus norvegicus];XP_017456476.1 PREDICTED: collectin-12 isoform X1 [Rattus norvegicus]	2	5	5	5	1	3	2	0	1	0	1	1	2	1	3	2	0	1	0	1	1	2	1	3	2	0	1	0	1	1	2	7.3	7.3	7.3	81.545	742	742;748	1	11	0	8.4562	1.6	4.7	3.4
NP_001020894.1	NP_001020894.1	1	1	1	NP_001020894.1 peptide chain release factor 1-like, mitochondrial precursor [Rattus norvegicus]	1	1	1	1	0	0	0	0	0	0	0	1	1	0	0	0	0	0	0	0	1	1	0	0	0	0	0	0	0	1	1	3.5	3.5	3.5	42.343	373	373	1	2	0.00019387	3.0455	0	0	0
NP_001020903.1	NP_001020903.1	21	21	21	NP_001020903.1 nucleolar protein 56 [Rattus norvegicus]	1	21	21	21	13	10	11	8	10	7	9	13	11	13	10	11	8	10	7	9	13	11	13	10	11	8	10	7	9	13	11	38.4	38.4	38.4	65.399	588	588	1	106	0	181.16	27	21.1	21.1
NP_001020904.1	NP_001020904.1	2	2	2	NP_001020904.1 endothelial protein C receptor precursor [Rattus norvegicus]	1	2	2	2	2	0	0	0	0	0	0	1	1	2	0	0	0	0	0	0	1	1	2	0	0	0	0	0	0	1	1	14.5	14.5	14.5	26.838	241	241	1	5	0	14.238	14.5	0	0
NP_001020908.1	NP_001020908.1	2	2	2	NP_001020908.1 acid sphingomyelinase-like phosphodiesterase 3b precursor [Rattus norvegicus]	1	2	2	2	2	0	0	0	0	0	1	0	0	2	0	0	0	0	0	1	0	0	2	0	0	0	0	0	1	0	0	8.6	8.6	8.6	51.645	456	456	1	3	0.00055096	2.3354	8.6	0	0
NP_001020909.1;XP_006239285.1;XP_006239284.1;XP_006239283.1;XP_006239282.1;NP_001129183.1	NP_001020909.1;XP_006239285.1;XP_006239284.1;XP_006239283.1;XP_006239282.1	7;7;7;7;7;2	7;7;7;7;7;2	7;7;7;7;7;2	NP_001020909.1 serine/arginine-rich splicing factor 10 [Rattus norvegicus];XP_006239285.1 PREDICTED: serine/arginine-rich splicing factor 10 isoform X4 [Rattus norvegicus];XP_006239284.1 PREDICTED: serine/arginine-rich splicing factor 10 isoform X3 [Rattus	6	7	7	7	2	4	4	3	2	4	4	1	1	2	4	4	3	2	4	4	1	1	2	4	4	3	2	4	4	1	1	45.1	45.1	45.1	19.971	164	164;182;183;261;262;261	1	30	0	30.243	16.5	24.4	24.4
NP_001020911.1;NP_001124015.1	NP_001020911.1	4;1	4;1	4;1	NP_001020911.1 ribonucleoside-diphosphate reductase subunit M2 [Rattus norvegicus]	2	4	4	4	0	1	0	0	0	0	2	0	2	0	1	0	0	0	0	2	0	2	0	1	0	0	0	0	2	0	2	13.6	13.6	13.6	45.038	390	390;351	1	5	0	12.291	0	3.8	0
NP_001020912.1	NP_001020912.1	21	21	21	NP_001020912.1 echinoderm microtubule-associated protein-like 1 [Rattus norvegicus]	1	21	21	21	12	15	12	14	9	10	6	6	9	12	15	12	14	9	10	6	6	9	12	15	12	14	9	10	6	6	9	31.3	31.3	31.3	86.532	783	783	1	103	0	148.23	19.4	23.5	20.3
NP_001020913.1;XP_006241030.1;XP_006241032.1;XP_006241031.1;XP_008763345.1	NP_001020913.1;XP_006241030.1;XP_006241032.1;XP_006241031.1;XP_008763345.1	5;5;4;4;3	5;5;4;4;3	5;5;4;4;3	NP_001020913.1 DAZ-associated protein 1 [Rattus norvegicus];XP_006241030.1 PREDICTED: DAZ-associated protein 1 isoform X1 [Rattus norvegicus];XP_006241032.1 PREDICTED: DAZ-associated protein 1 isoform X3 [Rattus norvegicus];XP_006241031.1 PREDICTED: DAZ-as	5	5	5	5	3	1	1	3	3	2	2	1	2	3	1	1	3	3	2	2	1	2	3	1	1	3	3	2	2	1	2	20.7	20.7	20.7	43.086	405	405;406;397;398;365	1	25	0	22.387	14.3	4	4
NP_001020927.1	NP_001020927.1	1	1	1	NP_001020927.1 transmembrane protein 186 [Rattus norvegicus]	1	1	1	1	0	0	0	1	1	0	1	1	0	0	0	0	1	1	0	1	1	0	0	0	0	1	1	0	1	1	0	5.6	5.6	5.6	24.64	216	216	1	4	0.00018779	2.6158	0	0	0
NP_001020933.1	NP_001020933.1	2	2	2	NP_001020933.1 histone-lysine N-methyltransferase SMYD3 [Rattus norvegicus]	1	2	2	2	0	1	1	0	1	1	0	1	1	0	1	1	0	1	1	0	1	1	0	1	1	0	1	1	0	1	1	5.4	5.4	5.4	49.081	428	428	1	6	0	4.695	0	2.3	2.3
NP_001020946.1	NP_001020946.1	2	2	2	NP_001020946.1 inositol hexakisphosphate and diphosphoinositol-pentakisphosphate kinase 2 [Rattus norvegicus]	1	2	2	2	1	2	0	0	1	1	0	1	1	1	2	0	0	1	1	0	1	1	1	2	0	0	1	1	0	1	1	5.1	5.1	5.1	58.023	509	509	1	9	0	6.6601	2.9	5.1	0
NP_001025069.1	NP_001025069.1	6	6	6	NP_001025069.1 39S ribosomal protein L19, mitochondrial [Rattus norvegicus]	1	6	6	6	3	3	1	2	0	1	1	0	1	3	3	1	2	0	1	1	0	1	3	3	1	2	0	1	1	0	1	19.5	19.5	19.5	33.633	292	292	1	15	0	8.9589	8.2	12.3	4.1
NP_001025071.1	NP_001025071.1	7	7	7	NP_001025071.1 39S ribosomal protein L12, mitochondrial [Rattus norvegicus]	1	7	7	7	5	5	6	6	6	4	7	6	6	5	5	6	6	6	4	7	6	6	5	5	6	6	6	4	7	6	6	30.8	30.8	30.8	29.441	276	276	1	72	0	48.256	30.4	25.4	30.4
NP_001025073.2;XP_008756840.1;XP_008756838.1;XP_017444811.1;XP_017444818.1;XP_017444810.1;XP_017444809.1;XP_017444807.1;XP_017444806.1;XP_017444805.1;XP_017444803.1;XP_017444814.1;XP_017444812.1;XP_017444817.1;XP_017444808.1;XP_017444804.1;XP_017444816.1;XP_017444815.1	NP_001025073.2;XP_008756840.1;XP_008756838.1;XP_017444811.1;XP_017444818.1;XP_017444810.1;XP_017444809.1;XP_017444807.1;XP_017444806.1;XP_017444805.1;XP_017444803.1;XP_017444814.1;XP_017444812.1;XP_017444817.1;XP_017444808.1;XP_017444804.1;XP_017444816.1;XP_017444815.1	9;9;9;9;9;9;9;9;9;9;9;8;8;8;8;8;7;7	9;9;9;9;9;9;9;9;9;9;9;8;8;8;8;8;7;7	9;9;9;9;9;9;9;9;9;9;9;8;8;8;8;8;7;7	NP_001025073.2 receptor-type tyrosine-protein phosphatase kappa precursor [Rattus norvegicus];XP_008756840.1 PREDICTED: receptor-type tyrosine-protein phosphatase kappa isoform X12 [Rattus norvegicus];XP_008756838.1 PREDICTED: receptor-type tyrosine-protei	18	9	9	9	3	5	5	2	6	5	4	6	7	3	5	5	2	6	5	4	6	7	3	5	5	2	6	5	4	6	7	10	10	10	162.18	1439	1439;1445;1457;1461;1465;1467;1469;1471;1479;1481;1485;1438;1460;1464;1470;1484;875;889	1	45	0	54.611	3.8	5.4	5.7
NP_001025081.2;XP_006244059.1	NP_001025081.2;XP_006244059.1	37;36	37;36	37;36	NP_001025081.2 programmed cell death 6-interacting protein [Rattus norvegicus];XP_006244059.1 PREDICTED: programmed cell death 6-interacting protein isoform X1 [Rattus norvegicus]	2	37	37	37	24	21	21	21	25	28	23	27	27	24	21	21	21	25	28	23	27	27	24	21	21	21	25	28	23	27	27	51.3	51.3	51.3	95.881	868	868;873	1	323	0	323.31	39.5	36.8	35
NP_001025086.1	NP_001025086.1	2	2	2	NP_001025086.1 ribosome biogenesis protein BRX1 homolog [Rattus norvegicus]	1	2	2	2	0	1	1	0	1	1	1	2	1	0	1	1	0	1	1	1	2	1	0	1	1	0	1	1	1	2	1	5.7	5.7	5.7	41.114	352	352	1	8	0.0069779	1.0927	0	2	3.7
NP_001025088.1	NP_001025088.1	10	10	10	NP_001025088.1 protein MEMO1 [Rattus norvegicus]	1	10	10	10	6	7	7	4	4	3	1	4	5	6	7	7	4	4	3	1	4	5	6	7	7	4	4	3	1	4	5	55.9	55.9	55.9	33.679	297	297	1	50	0	273.74	38	37.7	35.4
NP_001025094.1;XP_017448997.1	NP_001025094.1;XP_017448997.1	2;2	2;2	2;2	NP_001025094.1 protein OSCP1 [Rattus norvegicus];XP_017448997.1 PREDICTED: protein OSCP1 isoform X1 [Rattus norvegicus]	2	2	2	2	2	0	0	0	0	0	0	0	0	2	0	0	0	0	0	0	0	0	2	0	0	0	0	0	0	0	0	7.4	7.4	7.4	43.312	379	379;389	1	2	0.0003739	2.5515	7.4	0	0
NP_001025191.1;XP_017449526.1	NP_001025191.1;XP_017449526.1	10;9	8;7	8;7	NP_001025191.1 cAMP-dependent protein kinase type II-beta regulatory subunit [Rattus norvegicus];XP_017449526.1 PREDICTED: cAMP-dependent protein kinase type II-beta regulatory subunit isoform X1 [Rattus norvegicus]	2	10	8	8	8	7	6	6	6	6	6	4	7	6	5	4	4	4	5	4	3	5	6	5	4	4	4	5	4	3	5	33.9	26.9	26.9	46.122	416	416;336	1	48	0	105.06	30	26.9	23.1
NP_001025194.1	NP_001025194.1	8	8	8	NP_001025194.1 dual specificity mitogen-activated protein kinase kinase 4 [Rattus norvegicus]	1	8	8	8	4	1	2	2	4	5	3	4	3	4	1	2	2	4	5	3	4	3	4	1	2	2	4	5	3	4	3	27.2	27.2	27.2	44.113	397	397	1	40	0	42.789	16.9	4.3	9.8
NP_001025199.1;XP_008770702.1;XP_017456713.1	NP_001025199.1;XP_008770702.1;XP_017456713.1	10;10;8	10;10;8	10;10;8	NP_001025199.1 engulfment and cell motility protein 3 [Rattus norvegicus];XP_008770702.1 PREDICTED: engulfment and cell motility protein 3 isoform X1 [Rattus norvegicus];XP_017456713.1 PREDICTED: engulfment and cell motility protein 3 isoform X2 [Rattus no	3	10	10	10	4	4	5	4	4	4	3	7	4	4	4	5	4	4	4	3	7	4	4	4	5	4	4	4	3	7	4	20.7	20.7	20.7	81.658	720	720;747;587	1	42	0	87.374	8.5	7.8	9.3
NP_001025200.1;XP_008760532.1;XP_006235371.1	NP_001025200.1;XP_008760532.1;XP_006235371.1	3;2;2	3;2;2	3;2;2	NP_001025200.1 COMM domain-containing protein 7 [Rattus norvegicus];XP_008760532.1 PREDICTED: COMM domain-containing protein 7 isoform X2 [Rattus norvegicus];XP_006235371.1 PREDICTED: COMM domain-containing protein 7 isoform X1 [Rattus norvegicus]	3	3	3	3	2	2	1	0	2	2	0	2	1	2	2	1	0	2	2	0	2	1	2	2	1	0	2	2	0	2	1	16	16	16	22.595	200	200;160;215	1	12	0	6.2502	10	11.5	5.5
NP_001025201.1	NP_001025201.1	10	10	10	NP_001025201.1 cleavage and polyadenylation specificity factor subunit 3 [Rattus norvegicus]	1	10	10	10	4	3	3	1	4	3	3	3	4	4	3	3	1	4	3	3	3	4	4	3	3	1	4	3	3	3	4	25.5	25.5	25.5	77.633	685	685	1	30	0	34.824	9.1	10.5	5.3
NP_001025202.1;XP_006241313.1	NP_001025202.1;XP_006241313.1	30;25	30;25	30;25	NP_001025202.1 leukotriene A-4 hydrolase [Rattus norvegicus];XP_006241313.1 PREDICTED: leukotriene A-4 hydrolase isoform X1 [Rattus norvegicus]	2	30	30	30	19	21	16	19	21	19	21	22	21	19	21	16	19	21	19	21	22	21	19	21	16	19	21	19	21	22	21	52.2	52.2	52.2	69.088	611	611;532	1	267	0	323.31	37.8	43.5	35.4
NP_001026809.1	NP_001026809.1	33	33	33	NP_001026809.1 26S proteasome non-ATPase regulatory subunit 2 [Rattus norvegicus]	1	33	33	33	18	20	17	19	23	19	20	27	19	18	20	17	19	23	19	20	27	19	18	20	17	19	23	19	20	27	19	44.4	44.4	44.4	100.19	908	908	1	262	0	323.31	29.2	32.3	27.5
NP_001026810.1	NP_001026810.1	31	31	31	NP_001026810.1 eukaryotic translation initiation factor 3 subunit B [Rattus norvegicus]	1	31	31	31	20	17	17	17	18	24	20	22	21	20	17	17	17	18	24	20	22	21	20	17	17	17	18	24	20	22	21	45.3	45.3	45.3	90.91	797	797	1	233	0	323.31	35.8	31.9	30.6
NP_001026811.1;XP_006253173.1	NP_001026811.1;XP_006253173.1	7;7	7;7	7;7	NP_001026811.1 N(4)-(Beta-N-acetylglucosaminyl)-L-asparaginase precursor [Rattus norvegicus];XP_006253173.1 PREDICTED: N(4)-(Beta-N-acetylglucosaminyl)-L-asparaginase isoform X1 [Rattus norvegicus]	2	7	7	7	5	5	5	7	6	6	5	5	6	5	5	5	7	6	6	5	5	6	5	5	5	7	6	6	5	5	6	29.3	29.3	29.3	37.167	345	345;364	1	76	0	140.93	24.3	24.3	24.3
NP_001026812.1	NP_001026812.1	17	17	14	NP_001026812.1 leukocyte elastase inhibitor A [Rattus norvegicus]	1	17	17	14	11	13	10	10	15	13	10	12	11	11	13	10	10	15	13	10	12	11	8	10	7	7	12	10	8	9	9	47.5	47.5	38.5	42.726	379	379	1	158	0	263.15	36.1	42.2	35.4
NP_001026815.1	NP_001026815.1	10	10	10	NP_001026815.1 lysophosphatidic acid phosphatase type 6 [Rattus norvegicus]	1	10	10	10	6	7	6	7	9	9	6	7	8	6	7	6	7	9	9	6	7	8	6	7	6	7	9	9	6	7	8	30.3	30.3	30.3	47.28	413	413	1	85	0	156.84	21.8	23.2	18.9
NP_001026816.1	NP_001026816.1	14	14	14	NP_001026816.1 stomatin-like protein 2, mitochondrial [Rattus norvegicus]	1	14	14	14	9	9	8	6	9	10	8	10	9	9	9	8	6	9	10	8	10	9	9	9	8	6	9	10	8	10	9	50.7	50.7	50.7	38.413	353	353	1	96	0	172.59	39.7	46.7	38.2
NP_001026818.1;XP_006245530.1;NP_001102780.1;XP_017452096.1	NP_001026818.1	15;2;2;1	15;2;2;1	15;2;2;1	NP_001026818.1 EF-hand domain-containing protein D2 [Rattus norvegicus]	4	15	15	15	9	10	9	11	9	9	9	10	7	9	10	9	11	9	9	9	10	7	9	10	9	11	9	9	9	10	7	69.9	69.9	69.9	26.759	239	239;218;240;127	1	104	0	128.45	42.7	36.4	36
NP_001026820.1	NP_001026820.1	6	6	6	NP_001026820.1 39S ribosomal protein L44, mitochondrial [Rattus norvegicus]	1	6	6	6	2	2	3	2	1	1	2	3	2	2	2	3	2	1	1	2	3	2	2	2	3	2	1	1	2	3	2	21.1	21.1	21.1	37.44	332	332	1	20	0	55.414	12.7	9.6	10.2
NP_001026824.1;XP_006252689.1	NP_001026824.1;XP_006252689.1	16;13	16;13	16;13	NP_001026824.1 annexin A8 [Rattus norvegicus];XP_006252689.1 PREDICTED: annexin A8 isoform X1 [Rattus norvegicus]	2	16	16	16	10	10	11	11	10	11	9	10	10	10	10	11	11	10	11	9	10	10	10	10	11	11	10	11	9	10	10	60.6	60.6	60.6	36.706	327	327;301	1	128	0	323.31	46.8	46.2	47.1
NP_001026825.1	NP_001026825.1	7	7	7	NP_001026825.1 beta-mannosidase precursor [Rattus norvegicus]	1	7	7	7	3	1	1	1	2	3	1	0	1	3	1	1	1	2	3	1	0	1	3	1	1	1	2	3	1	0	1	11.7	11.7	11.7	101.22	881	881	1	13	0	9.0246	4.5	1	1.1
NP_001026827.1;XP_006240494.1	NP_001026827.1;XP_006240494.1	3;3	3;3	3;3	NP_001026827.1 tyrosyl-DNA phosphodiesterase 1 [Rattus norvegicus];XP_006240494.1 PREDICTED: tyrosyl-DNA phosphodiesterase 1 isoform X1 [Rattus norvegicus]	2	3	3	3	0	0	0	1	1	0	2	0	1	0	0	0	1	1	0	2	0	1	0	0	0	1	1	0	2	0	1	6.4	6.4	6.4	68.632	609	609;625	1	5	0.0027787	1.5838	0	0	0
NP_001026829.2;XP_006245441.1;XP_008765476.1;XP_017451977.1;XP_008765479.1;XP_017451976.1;XP_008765478.1;XP_017451975.1;XP_017451974.1;XP_006245442.1;XP_008765477.1;XP_006245439.1;XP_008765475.1;XP_008765474.1	NP_001026829.2;XP_006245441.1;XP_008765476.1;XP_017451977.1;XP_008765479.1;XP_017451976.1;XP_008765478.1;XP_017451975.1;XP_017451974.1;XP_006245442.1;XP_008765477.1;XP_006245439.1;XP_008765475.1;XP_008765474.1	19;19;19;18;18;18;18;18;18;18;18;18;18;18	19;19;19;18;18;18;18;18;18;18;18;18;18;18	19;19;19;18;18;18;18;18;18;18;18;18;18;18	NP_001026829.2 E3 ubiquitin-protein ligase TRIP12 [Rattus norvegicus];XP_006245441.1 PREDICTED: E3 ubiquitin-protein ligase TRIP12 isoform X4 [Rattus norvegicus];XP_008765476.1 PREDICTED: E3 ubiquitin-protein ligase TRIP12 isoform X2 [Rattus norvegicus];XP	14	19	19	19	8	6	7	2	6	5	7	8	8	8	6	7	2	6	5	7	8	8	8	6	7	2	6	5	7	8	8	13	13	13	223.93	2025	2025;2067;2070;1998;2029;2040;2042;2043;2044;2063;2066;2068;2071;2071	1	63	0	62.912	6.5	5	5.4
NP_001026832.1	NP_001026832.1	5	5	5	NP_001026832.1 ubiquinone biosynthesis protein COQ4 homolog, mitochondrial precursor [Rattus norvegicus]	1	5	5	5	2	2	0	0	2	0	0	0	0	2	2	0	0	2	0	0	0	0	2	2	0	0	2	0	0	0	0	23.4	23.4	23.4	30.013	265	265	1	6	0	12.686	8.7	9.1	0
NP_001026992.1;XP_008761288.2	NP_001026992.1;XP_008761288.2	27;24	27;24	25;22	NP_001026992.1 coatomer subunit gamma-1 [Rattus norvegicus];XP_008761288.2 PREDICTED: coatomer subunit gamma-1 isoform X1 [Rattus norvegicus]	2	27	27	25	20	18	17	20	19	18	18	17	21	20	18	17	20	19	18	18	17	21	18	17	16	18	18	17	17	16	20	44.1	44.1	41.8	97.613	874	874;865	1	261	0	323.31	34.1	34.3	32
NP_001028240.3	NP_001028240.3	18	18	18	NP_001028240.3 enhancer of mRNA-decapping protein 4 [Rattus norvegicus]	1	18	18	18	5	9	6	6	3	4	5	5	6	5	9	6	6	3	4	5	5	6	5	9	6	6	3	4	5	5	6	19	19	19	152.59	1407	1407	1	54	0	216.88	6	9.7	6.8
NP_001028242.1;XP_008763253.1;XP_006240843.1	NP_001028242.1;XP_008763253.1;XP_006240843.1	8;6;6	8;6;6	8;6;6	NP_001028242.1 SAP domain-containing ribonucleoprotein [Rattus norvegicus];XP_008763253.1 PREDICTED: SAP domain-containing ribonucleoprotein isoform X2 [Rattus norvegicus];XP_006240843.1 PREDICTED: SAP domain-containing ribonucleoprotein isoform X1 [Rattus	3	8	8	8	5	4	3	5	3	2	5	6	5	5	4	3	5	3	2	5	6	5	5	4	3	5	3	2	5	6	5	39	39	39	23.605	210	210;176;187	1	40	0	97.555	23.3	22.9	20.5
NP_001028244.1	NP_001028244.1	11	1	1	NP_001028244.1 triosephosphate isomerase [Rattus norvegicus]	1	11	1	1	8	9	6	9	7	5	6	5	5	1	0	0	0	0	0	0	0	0	1	0	0	0	0	0	0	0	0	49.8	5.2	5.2	26.867	249	249	1	1	0.0007096	1.8493	46.2	41.8	38.2
NP_001028828.1;XP_006256559.1	NP_001028828.1;XP_006256559.1	10;9	10;9	10;9	NP_001028828.1 mannosyl-oligosaccharide 1,2-alpha-mannosidase IA [Rattus norvegicus];XP_006256559.1 PREDICTED: mannosyl-oligosaccharide 1,2-alpha-mannosidase IA isoform X1 [Rattus norvegicus]	2	10	10	10	8	3	5	4	6	5	4	3	3	8	3	5	4	6	5	4	3	3	8	3	5	4	6	5	4	3	3	25.5	25.5	25.5	73.124	655	655;746	1	46	0	29.449	18	9.9	12.2
NP_001028843.1;XP_006235327.1;NP_001028842.1;XP_017446969.1;XP_017446968.1;XP_017446967.1;XP_006235326.1;NP_113723.2;NP_001028844.1	NP_001028843.1;XP_006235327.1;NP_001028842.1;XP_017446969.1;XP_017446968.1;XP_017446967.1;XP_006235326.1;NP_113723.2;NP_001028844.1	1;1;1;1;1;1;1;1;1	1;1;1;1;1;1;1;1;1	1;1;1;1;1;1;1;1;1	NP_001028843.1 bcl-2-like protein 1 isoform 3 [Rattus norvegicus];XP_006235327.1 PREDICTED: bcl-2-like protein 1 isoform X2 [Rattus norvegicus];NP_001028842.1 bcl-2-like protein 1 isoform 2 [Rattus norvegicus];XP_017446969.1 PREDICTED: bcl-2-like protein 1	9	1	1	1	1	0	0	0	1	0	0	0	0	1	0	0	0	1	0	0	0	0	1	0	0	0	1	0	0	0	0	5.9	5.9	5.9	18.987	170	170;233;233;284;284;284;284;284;284	1	2	0.00019109	2.7997	5.9	0	0
NP_001028854.1	NP_001028854.1	3	3	3	NP_001028854.1 sedoheptulokinase [Rattus norvegicus]	1	3	3	3	2	1	1	1	1	1	1	0	0	2	1	1	1	1	1	1	0	0	2	1	1	1	1	1	1	0	0	8.9	8.9	8.9	50.638	472	472	1	9	0	14.727	5.9	3	3
NP_001028855.1	NP_001028855.1	15	15	15	NP_001028855.1 synaptic vesicle membrane protein VAT-1 homolog [Rattus norvegicus]	1	15	15	15	11	11	10	9	12	10	9	11	13	11	11	10	9	12	10	9	11	13	11	11	10	9	12	10	9	11	13	54.5	54.5	54.5	43.118	404	404	1	159	0	323.31	44.6	46	40.8
NP_001028856.1;NP_001014250.1;XP_017452911.1;XP_017452914.1;XP_017452913.1;XP_017452912.1	NP_001028856.1	21;4;4;3;3;3	21;4;4;3;3;3	21;4;4;3;3;3	NP_001028856.1 T-complex protein 1 subunit zeta [Rattus norvegicus]	6	21	21	21	16	14	13	12	10	10	11	10	12	16	14	13	12	10	10	11	10	12	16	14	13	12	10	10	11	10	12	46.1	46.1	46.1	58.017	531	531;531;543;477;477;477	1	178	0	323.31	39.9	35	33.7
NP_001028861.1;XP_006255300.1;XP_006255302.1	NP_001028861.1;XP_006255300.1	4;4;1	4;4;1	4;4;1	NP_001028861.1 lon protease homolog 2, peroxisomal [Rattus norvegicus];XP_006255300.1 PREDICTED: lon protease homolog 2, peroxisomal isoform X1 [Rattus norvegicus]	3	4	4	4	1	0	1	1	2	3	3	1	3	1	0	1	1	2	3	3	1	3	1	0	1	1	2	3	3	1	3	6.2	6.2	6.2	89.754	806	806;852;640	1	16	0	7.0126	1.5	0	1.5
NP_001028868.1;XP_008768246.1;XP_006250725.1;XP_006250724.1	NP_001028868.1;XP_008768246.1;XP_006250725.1;XP_006250724.1	5;5;5;5	4;4;4;4	4;4;4;4	NP_001028868.1 heterogeneous nuclear ribonucleoprotein D-like [Rattus norvegicus];XP_008768246.1 PREDICTED: heterogeneous nuclear ribonucleoprotein D-like isoform X1 [Rattus norvegicus];XP_006250725.1 PREDICTED: heterogeneous nuclear ribonucleoprotein D-li	4	5	4	4	2	3	2	2	2	3	2	3	3	1	2	1	1	1	2	1	2	2	1	2	1	1	1	2	1	2	2	15.8	13.4	13.4	35.294	322	322;419;419;419	1	13	0	8.0062	13.4	13.4	7.5
NP_001028871.2;XP_003749176.2	NP_001028871.2;XP_003749176.2	6;3	6;3	6;3	NP_001028871.2 COX15 homolog [Rattus norvegicus];XP_003749176.2 PREDICTED: cytochrome c oxidase assembly protein COX15 homolog [Rattus norvegicus]	2	6	6	6	3	1	0	2	1	2	2	2	1	3	1	0	2	1	2	2	2	1	3	1	0	2	1	2	2	2	1	20.8	20.8	20.8	45.914	414	414;210	1	17	0	15.076	11.4	4.3	0
NP_001028876.1;XP_006244158.1;XP_017451188.1;XP_017451187.1	NP_001028876.1;XP_006244158.1	5;3;2;2	5;3;2;2	5;3;2;2	NP_001028876.1 xylulose kinase [Rattus norvegicus];XP_006244158.1 PREDICTED: xylulose kinase isoform X3 [Rattus norvegicus]	4	5	5	5	2	1	1	2	1	2	2	1	2	2	1	1	2	1	2	2	1	2	2	1	1	2	1	2	2	1	2	17.5	17.5	17.5	57.969	536	536;458;490;504	1	16	0	17.076	6.2	4.7	4.7
NP_001028878.1;XP_006229162.1;XP_006229161.1	NP_001028878.1;XP_006229162.1;XP_006229161.1	15;14;14	15;14;14	15;14;14	NP_001028878.1 aldehyde dehydrogenase family 16 member A1 [Rattus norvegicus];XP_006229162.1 PREDICTED: aldehyde dehydrogenase family 16 member A1 isoform X2 [Rattus norvegicus];XP_006229161.1 PREDICTED: aldehyde dehydrogenase family 16 member A1 isoform X	3	15	15	15	7	9	6	7	10	9	11	10	11	7	9	6	7	10	9	11	10	11	7	9	6	7	10	9	11	10	11	23.2	23.2	23.2	85.413	802	802;741;756	1	116	0	243.77	13.3	15.3	10.2
NP_001028879.1;XP_006234593.1;XP_006234592.1;XP_006234591.1	NP_001028879.1;XP_006234593.1;XP_006234592.1;XP_006234591.1	7;7;7;7	6;6;6;6	6;6;6;6	NP_001028879.1 ADP-ribosylation factor GTPase-activating protein 2 [Rattus norvegicus];XP_006234593.1 PREDICTED: ADP-ribosylation factor GTPase-activating protein 2 isoform X3 [Rattus norvegicus];XP_006234592.1 PREDICTED: ADP-ribosylation factor GTPase-act	4	7	6	6	5	1	1	2	2	2	2	1	2	4	0	0	1	1	1	1	0	1	4	0	0	1	1	1	1	0	1	16	14	14	56.556	520	520;529;534;543	1	9	0	5.8109	12.3	1.9	1.9
NP_001029040.1;XP_017447506.1;XP_006233784.1	NP_001029040.1;XP_017447506.1;XP_006233784.1	5;3;3	5;3;3	5;3;3	NP_001029040.1 surfeit locus protein 4 [Rattus norvegicus];XP_017447506.1 PREDICTED: surfeit locus protein 4 isoform X1 [Rattus norvegicus];XP_006233784.1 PREDICTED: surfeit locus protein 4-like [Rattus norvegicus]	3	5	5	5	4	3	3	2	4	5	4	4	4	4	3	3	2	4	5	4	4	4	4	3	3	2	4	5	4	4	4	22.7	22.7	22.7	30.381	269	269;226;226	1	48	0	102.61	19.7	16.4	16.4
NP_001029061.1	NP_001029061.1	17	17	17	NP_001029061.1 conserved oligomeric Golgi complex subunit 7 [Rattus norvegicus]	1	17	17	17	5	6	5	5	8	10	8	5	5	5	6	5	5	8	10	8	5	5	5	6	5	5	8	10	8	5	5	33.9	33.9	33.9	86.211	770	770	1	61	0	73.341	12.3	10.9	11.6
NP_001029062.1	NP_001029062.1	2	2	2	NP_001029062.1 protein RTF2 homolog [Rattus norvegicus]	1	2	2	2	0	1	0	1	0	0	1	0	0	0	1	0	1	0	0	1	0	0	0	1	0	1	0	0	1	0	0	7.2	7.2	7.2	33.811	306	306	1	3	0.00055228	2.3682	0	3.3	0
NP_001029063.1	NP_001029063.1	6	6	1	NP_001029063.1 MOB kinase activator 1A [Rattus norvegicus]	1	6	6	1	1	4	2	3	5	5	2	4	5	1	4	2	3	5	5	2	4	5	0	1	0	0	1	1	0	1	0	23.6	23.6	3.2	25.079	216	216	1	36	0	16.754	3.2	13	8.8
NP_001029069.1;XP_006239646.1	NP_001029069.1;XP_006239646.1	2;2	2;2	2;2	NP_001029069.1 nucleolar complex protein 2 homolog precursor [Rattus norvegicus];XP_006239646.1 PREDICTED: nucleolar complex protein 2 homolog isoform X1 [Rattus norvegicus]	2	2	2	2	0	0	0	0	0	0	1	1	1	0	0	0	0	0	0	1	1	1	0	0	0	0	0	0	1	1	1	3.4	3.4	3.4	73.793	644	644;748	1	3	0.00018939	2.7086	0	0	0
NP_001029070.1	NP_001029070.1	20	3	3	NP_001029070.1 calumenin isoform b precursor [Rattus norvegicus]	1	20	3	3	15	13	9	10	12	12	13	10	10	1	0	1	2	2	3	3	1	1	1	0	1	2	2	3	3	1	1	55.2	5.7	5.7	37.147	315	315	1	19	0	65.736	55.2	45.4	37.8
NP_001029071.1	NP_001029071.1	4	4	4	NP_001029071.1 spermine synthase [Rattus norvegicus]	1	4	4	4	2	1	1	2	1	2	2	2	2	2	1	1	2	1	2	2	2	2	2	1	1	2	1	2	2	2	2	19.1	19.1	19.1	41.31	366	366	1	16	0	9.9844	5.2	2.2	8.2
NP_001029073.1	NP_001029073.1	1	1	1	NP_001029073.1 speckle targeted PIP5K1A-regulated poly(A) polymerase [Rattus norvegicus]	1	1	1	1	0	0	0	0	0	0	1	0	0	0	0	0	0	0	0	1	0	0	0	0	0	0	0	0	1	0	0	1.4	1.4	1.4	94.377	866	866	1	1	0.0043867	1.2643	0	0	0
NP_001029098.1;NP_663702.1;XP_006257733.1;NP_001258129.1;NP_001258128.1;NP_001258130.1;XP_006257738.1;XP_006257737.1;XP_006257736.1;XP_006257735.1;XP_006257734.1;XP_006241241.1	NP_001029098.1;NP_663702.1;XP_006257733.1;NP_001258129.1;NP_001258128.1	5;4;4;3;3;2;2;2;2;2;2;1	5;4;4;3;3;2;2;2;2;2;2;1	5;4;4;3;3;2;2;2;2;2;2;1	NP_001029098.1 four and a half LIM domains protein 1 isoform 1 [Rattus norvegicus];NP_663702.1 four and a half LIM domains protein 1 isoform 2 [Rattus norvegicus];XP_006257733.1 PREDICTED: four and a half LIM domains protein 1 isoform X1 [Rattus norvegicus	12	5	5	5	3	2	2	2	3	3	3	2	2	3	2	2	2	3	3	3	2	2	3	2	2	2	3	3	3	2	2	15.5	15.5	15.5	33.578	296	296;210;339;280;280;194;323;323;323;323;323;280	1	30	0	17.839	10.5	7.8	7.8
NP_001029099.1	NP_001029099.1	14	14	13	NP_001029099.1 obg-like ATPase 1 [Rattus norvegicus]	1	14	14	13	9	7	7	6	6	9	7	9	10	9	7	7	6	6	9	7	9	10	8	6	6	5	6	8	6	8	9	38.1	38.1	35.9	44.535	396	396	1	94	0	83.173	25	24.5	22.7
NP_001029139.1;NP_112248.2	NP_001029139.1;NP_112248.2	13;13	13;13	13;13	NP_001029139.1 adenylate kinase 2, mitochondrial isoform b [Rattus norvegicus];NP_112248.2 adenylate kinase 2, mitochondrial isoform a [Rattus norvegicus]	2	13	13	13	7	8	6	8	8	9	9	9	9	7	8	6	8	8	9	9	9	9	7	8	6	8	8	9	9	9	9	48.3	48.3	48.3	25.529	232	232;239	1	117	0	106.55	33.2	37.5	28.4
NP_001029140.1;XP_006256152.1;XP_006256150.1;XP_006256149.1;XP_006256148.1;XP_006256147.1;XP_006256146.1;XP_006256145.1;XP_006256144.1;XP_006256155.1;NP_446061.2;XP_006256154.1;XP_006256156.1;XP_006256153.1;XP_006256151.1	NP_001029140.1;XP_006256152.1;XP_006256150.1;XP_006256149.1;XP_006256148.1;XP_006256147.1;XP_006256146.1;XP_006256145.1;XP_006256144.1;XP_006256155.1;NP_446061.2;XP_006256154.1;XP_006256156.1;XP_006256153.1;XP_006256151.1	17;17;17;17;17;17;17;17;17;15;15;15;15;15;15	17;17;17;17;17;17;17;17;17;15;15;15;15;15;15	17;17;17;17;17;17;17;17;17;15;15;15;15;15;15	NP_001029140.1 large proline-rich protein BAG6 isoform 1 [Rattus norvegicus];XP_006256152.1 PREDICTED: large proline-rich protein BAG6 isoform X8 [Rattus norvegicus];XP_006256150.1 PREDICTED: large proline-rich protein BAG6 isoform X6 [Rattus norvegicus];X	15	17	17	17	9	5	7	5	11	6	6	11	9	9	5	7	5	11	6	6	11	9	9	5	7	5	11	6	6	11	9	22.1	22.1	22.1	120.01	1146	1146;1165;1182;1182;1182;1183;1201;1218;1219;1079;1096;1133;1134;1151;1170	1	77	0	92.981	12.7	5.8	8.9
NP_001029142.1;XP_017450307.1;XP_006240997.1;XP_008763325.1;NP_001009967.2;XP_008763323.1;XP_017444762.1;NP_001012761.1;NP_001036086.1;XP_008759538.1;XP_008759537.1	NP_001029142.1;XP_017450307.1;XP_006240997.1;XP_008763325.1;NP_001009967.2;XP_008763323.1;XP_017444762.1;NP_001012761.1;NP_001036086.1;XP_008759538.1;XP_008759537.1	2;2;2;2;2;2;1;1;1;1;1	2;2;2;2;2;2;1;1;1;1;1	2;2;2;2;2;2;1;1;1;1;1	NP_001029142.1 phosphatidylinositol 4-phosphate 5-kinase type-1 gamma isoform b [Rattus norvegicus];XP_017450307.1 PREDICTED: phosphatidylinositol 4-phosphate 5-kinase type-1 gamma isoform X4 [Rattus norvegicus];XP_006240997.1 PREDICTED: phosphatidylinosit	11	2	2	2	1	0	1	0	1	0	0	0	0	1	0	1	0	1	0	0	0	0	1	0	1	0	1	0	0	0	0	6	6	6	69.656	636	636;660;662;666;688;692;539;539;546;547;548	1	3	0	5.7685	3.8	0	2.2
NP_001029143.1;NP_064465.1	NP_001029143.1;NP_064465.1	3;3	3;3	3;3	NP_001029143.1 NADH dehydrogenase [ubiquinone] 1 alpha subcomplex assembly factor 3 isoform b [Rattus norvegicus];NP_064465.1 NADH dehydrogenase [ubiquinone] 1 alpha subcomplex assembly factor 3 isoform a [Rattus norvegicus]	2	3	3	3	1	1	0	1	1	0	0	1	2	1	1	0	1	1	0	0	1	2	1	1	0	1	1	0	0	1	2	17.9	17.9	17.9	19.863	179	179;185	1	7	0.0001947	3.1076	6.1	6.1	0
NP_001029146.1;NP_068614.1	NP_001029146.1;NP_068614.1	5;5	4;4	4;4	NP_001029146.1 alpha-endosulfine isoform 1 [Rattus norvegicus];NP_068614.1 alpha-endosulfine isoform 2 [Rattus norvegicus]	2	5	4	4	2	2	0	1	1	3	2	1	1	1	2	0	0	0	2	2	0	0	1	2	0	0	0	2	2	0	0	43.6	34.2	34.2	12.921	117	117;121	1	7	0	11.202	29.1	29.1	0
NP_001029170.1;XP_006230331.1	NP_001029170.1;XP_006230331.1	4;4	4;4	4;4	NP_001029170.1 integrin alpha-L precursor [Rattus norvegicus];XP_006230331.1 PREDICTED: integrin alpha-L isoform X1 [Rattus norvegicus]	2	4	4	4	2	1	1	0	0	0	1	0	0	2	1	1	0	0	0	1	0	0	2	1	1	0	0	0	1	0	0	3.6	3.6	3.6	127.59	1160	1160;1161	1	5	0.00018929	2.7062	1.9	0.9	0.9
NP_001029174.2;XP_006242555.1;XP_006242554.1;XP_008764116.1;XP_008764115.1;XP_006242553.1;XP_006242552.1;XP_006242551.1;XP_006242550.1	NP_001029174.2;XP_006242555.1;XP_006242554.1;XP_008764116.1;XP_008764115.1;XP_006242553.1;XP_006242552.1;XP_006242551.1;XP_006242550.1	5;5;5;5;5;5;5;5;5	5;5;5;5;5;5;5;5;5	5;5;5;5;5;5;5;5;5	NP_001029174.2 transcriptional coactivator YAP1 [Rattus norvegicus];XP_006242555.1 PREDICTED: transcriptional coactivator YAP1 isoform X8 [Rattus norvegicus];XP_006242554.1 PREDICTED: transcriptional coactivator YAP1 isoform X7 [Rattus norvegicus];XP_00876	9	5	5	5	1	1	1	1	1	1	1	1	1	1	1	1	1	1	1	1	1	1	1	1	1	1	1	1	1	1	1	25.1	25.1	25.1	39.173	366	366;469;471;473;475;485;487;489;491	1	10	0	28.04	9.3	3	3
NP_001029192.1;NP_062032.1	NP_001029192.1;NP_062032.1	9;8	9;8	8;7	NP_001029192.1 synapsin-2 isoform 1 [Rattus norvegicus];NP_062032.1 synapsin-2 isoform 2 [Rattus norvegicus]	2	9	9	8	6	5	4	3	5	4	2	4	4	6	5	4	3	5	4	2	4	4	5	4	3	2	4	3	2	3	4	24.7	24.7	22	63.456	586	586;479	1	40	0	63.708	15.5	13	11.9
NP_001029241.1;NP_001029240.1	NP_001029241.1;NP_001029240.1	38;35	5;5	0;0	NP_001029241.1 tropomyosin alpha-1 chain isoform Tpm1.6cy [Rattus norvegicus];NP_001029240.1 tropomyosin alpha-1 chain isoform a [Rattus norvegicus]	2	38	5	0	30	30	31	28	31	27	28	30	29	3	3	3	1	1	0	1	3	2	0	0	0	0	0	0	0	0	0	79.6	14.1	0	32.708	284	284;287	1	19	0	69.656	71.5	72.9	76.1
NP_001029243.1	NP_001029243.1	38	3	0	NP_001029243.1 tropomyosin alpha-1 chain isoform Tpm1.3sm [Rattus norvegicus]	1	38	3	0	32	29	30	30	33	33	32	29	29	1	0	1	2	1	2	2	1	1	0	0	0	0	0	0	0	0	0	76.8	9.9	0	32.792	284	284	1	11	0	4.6939	71.1	66.2	71.1
NP_001029244.1	NP_001029244.1	36	1	0	NP_001029244.1 tropomyosin alpha-1 chain isoform Tpm1.10br [Rattus norvegicus]	1	36	1	0	27	28	29	26	29	26	26	28	27	0	1	1	0	0	1	0	0	0	0	0	0	0	0	0	0	0	0	75.1	6.4	0	32.495	281	281	1	3	0.00019095	2.7928	60.5	68.3	71.5
NP_001029245.1;NP_062004.1	NP_001029245.1;NP_062004.1	32;29	6;6	0;0	NP_001029245.1 tropomyosin alpha-1 chain isoform Tpm1.8cy [Rattus norvegicus];NP_062004.1 tropomyosin alpha-1 chain isoform Tpm1.11br [Rattus norvegicus]	2	32	6	0	26	25	25	25	27	24	23	24	24	4	4	3	5	4	4	3	4	4	0	0	0	0	0	0	0	0	0	77	15.3	0	28.556	248	248;251	1	44	0	46.477	73.8	71	73
NP_001029251.1;XP_017453005.1;XP_006247478.1;XP_006247477.1	NP_001029251.1;XP_017453005.1;XP_006247478.1;XP_006247477.1	2;2;2;2	2;2;2;2	2;2;2;2	NP_001029251.1 mediator of RNA polymerase II transcription subunit 24 [Rattus norvegicus];XP_017453005.1 PREDICTED: mediator of RNA polymerase II transcription subunit 24 isoform X1 [Rattus norvegicus];XP_006247478.1 PREDICTED: mediator of RNA polymerase I	4	2	2	2	1	0	0	1	1	0	2	0	1	1	0	0	1	1	0	2	0	1	1	0	0	1	1	0	2	0	1	3	3	3	110.08	987	987;1006;1006;1006	1	6	0	10.614	1.4	0	0
NP_001029252.1;XP_017452626.1	NP_001029252.1;XP_017452626.1	2;1	2;1	2;1	NP_001029252.1 peptide YY precursor [Rattus norvegicus];XP_017452626.1 PREDICTED: peptide YY isoform X1 [Rattus norvegicus]	2	2	2	2	1	0	0	1	1	1	0	0	1	1	0	0	1	1	1	0	0	1	1	0	0	1	1	1	0	0	1	21.4	21.4	21.4	11.121	98	98;96	1	7	0	14.795	13.3	0	0
NP_001029260.1;NP_001025212.1	NP_001029260.1;NP_001025212.1	8;8	8;8	8;8	NP_001029260.1 histone-arginine methyltransferase CARM1 isoform d [Rattus norvegicus];NP_001025212.1 histone-arginine methyltransferase CARM1 isoform a [Rattus norvegicus]	2	8	8	8	2	4	1	3	3	4	2	4	6	2	4	1	3	3	4	2	4	6	2	4	1	3	3	4	2	4	6	15.9	15.9	15.9	63.459	585	585;608	1	34	0	15.357	5.3	9.9	2.2
NP_001029265.1	NP_001029265.1	18	18	18	NP_001029265.1 superkiller viralicidic activity 2-like 2 [Rattus norvegicus]	1	18	18	18	9	9	7	8	5	3	8	10	12	9	9	7	8	5	3	8	10	12	9	9	7	8	5	3	8	10	12	22.4	22.4	22.4	117.94	1042	1042	1	82	0	84.46	12.1	11.4	9.2
NP_001029281.1	NP_001029281.1	10	10	10	NP_001029281.1 alanyl-tRNA editing protein Aarsd1 [Rattus norvegicus]	1	10	10	10	4	6	4	3	3	5	8	6	5	4	6	4	3	3	5	8	6	5	4	6	4	3	3	5	8	6	5	31.6	31.6	31.6	45.093	412	412	1	56	0	35.421	15	21.8	15.3
NP_001029298.1	NP_001029298.1	13	13	13	NP_001029298.1 omega-amidase NIT2 [Rattus norvegicus]	1	13	13	13	11	9	9	10	11	10	8	8	9	11	9	9	10	11	10	8	8	9	11	9	9	10	11	10	8	8	9	47.1	47.1	47.1	30.701	276	276	1	130	0	224.65	41.3	32.2	32.2
NP_001029304.1;XP_006238570.1;XP_006238571.1;XP_008762089.1	NP_001029304.1;XP_006238570.1;XP_006238571.1;XP_008762089.1	4;4;3;3	4;4;3;3	4;4;3;3	NP_001029304.1 UPF0587 protein C1orf123 homolog [Rattus norvegicus];XP_006238570.1 PREDICTED: UPF0587 protein C1orf123 homolog isoform X1 [Rattus norvegicus];XP_006238571.1 PREDICTED: UPF0587 protein C1orf123 homolog isoform X3 [Rattus norvegicus];XP_00876	4	4	4	4	3	2	1	2	1	2	2	1	1	3	2	1	2	1	2	2	1	1	3	2	1	2	1	2	2	1	1	33.1	33.1	33.1	18.094	160	160;177;130;146	1	18	0	76.131	25.6	17.5	10.6
NP_001029306.1	NP_001029306.1	17	17	17	NP_001029306.1 eukaryotic translation initiation factor 3 subunit L [Rattus norvegicus]	1	17	17	17	10	12	6	11	12	12	8	12	10	10	12	6	11	12	12	8	12	10	10	12	6	11	12	12	8	12	10	46.9	46.9	46.9	45.082	382	382	1	121	0	145.51	32.7	34.8	18.8
NP_001029307.1	NP_001029307.1	2	2	2	NP_001029307.1 E3 ubiquitin-protein ligase RBX1 [Rattus norvegicus]	1	2	2	2	2	1	1	2	2	2	2	2	1	2	1	1	2	2	2	2	2	1	2	1	1	2	2	2	2	2	1	17.6	17.6	17.6	12.274	108	108	1	15	0	44.276	17.6	17.6	17.6
NP_001029308.1	NP_001029308.1	5	5	5	NP_001029308.1 39S ribosomal protein L2, mitochondrial precursor [Rattus norvegicus]	1	5	5	5	2	1	1	2	2	4	3	4	2	2	1	1	2	2	4	3	4	2	2	1	1	2	2	4	3	4	2	24	24	24	32.999	304	304	1	22	0	15.321	14.1	10.2	10.2
NP_001029312.1;XP_017453804.1	NP_001029312.1;XP_017453804.1	19;18	19;18	19;18	NP_001029312.1 brain-specific angiogenesis inhibitor 1-associated protein 2-like protein 1 [Rattus norvegicus];XP_017453804.1 PREDICTED: brain-specific angiogenesis inhibitor 1-associated protein 2-like protein 1 isoform X1 [Rattus norvegicus]	2	19	19	19	7	9	8	10	11	11	11	9	11	7	9	8	10	11	11	11	9	11	7	9	8	10	11	11	11	9	11	41.5	41.5	41.5	57.468	516	516;521	1	101	0	237.35	18.4	22.5	21.9
NP_001029315.1	NP_001029315.1	1	1	1	NP_001029315.1 aspartate--tRNA ligase, mitochondrial precursor [Rattus norvegicus]	1	1	1	1	1	1	1	0	0	0	0	0	0	1	1	1	0	0	0	0	0	0	1	1	1	0	0	0	0	0	0	1.4	1.4	1.4	73.952	652	652	1	3	0.0032579	1.4326	1.4	1.4	1.4
NP_001029317.1	NP_001029317.1	5	5	5	NP_001029317.1 elongator complex protein 2 [Rattus norvegicus]	1	5	5	5	2	1	2	0	0	1	1	1	3	2	1	2	0	0	1	1	1	3	2	1	2	0	0	1	1	1	3	13.3	13.3	13.3	91.745	821	821	1	12	0	16.009	4.1	2.2	5.6
NP_001029318.1;XP_008770832.1;XP_008770831.1	NP_001029318.1;XP_008770832.1;XP_008770831.1	11;10;10	11;10;10	11;10;10	NP_001029318.1 ubiquitin carboxyl-terminal hydrolase 10 [Rattus norvegicus];XP_008770832.1 PREDICTED: ubiquitin carboxyl-terminal hydrolase 10 isoform X2 [Rattus norvegicus];XP_008770831.1 PREDICTED: ubiquitin carboxyl-terminal hydrolase 10 isoform X1 [Rat	3	11	11	11	7	7	6	4	3	2	3	5	3	7	7	6	4	3	2	3	5	3	7	7	6	4	3	2	3	5	3	21.5	21.5	21.5	87.31	794	794;923;924	1	43	0	40.745	13.9	13	12.1
NP_001029320.1	NP_001029320.1	5	5	5	NP_001029320.1 N-myc-interactor [Rattus norvegicus]	1	5	5	5	4	1	1	1	1	1	2	1	2	4	1	1	1	1	1	2	1	2	4	1	1	1	1	1	2	1	2	21.4	21.4	21.4	31.695	280	280	1	15	0	7.5269	17.9	3.6	5.7
NP_001029322.1	NP_001029322.1	13	13	13	NP_001029322.1 signal recognition particle receptor subunit alpha [Rattus norvegicus]	1	13	13	13	7	2	2	6	3	4	4	5	3	7	2	2	6	3	4	4	5	3	7	2	2	6	3	4	4	5	3	26.4	26.4	26.4	69.656	636	636	1	40	0	94.897	15.1	4.2	3.6
NP_001029328.1	NP_001029328.1	4	4	4	NP_001029328.1 trafficking protein particle complex subunit 9 [Rattus norvegicus]	1	4	4	4	1	0	1	0	2	1	0	0	1	1	0	1	0	2	1	0	0	1	1	0	1	0	2	1	0	0	1	4.1	4.1	4.1	127.42	1139	1139	1	6	0	4.48	0.9	0	1.1
NP_001029335.1	NP_001029335.1	14	14	14	NP_001029335.1 bleomycin hydrolase [Rattus norvegicus]	1	14	14	14	6	10	8	7	8	5	7	5	5	6	10	8	7	8	5	7	5	5	6	10	8	7	8	5	7	5	5	34.9	34.9	34.9	52.451	455	455	1	95	0	175.94	24.4	33	28.1
NP_001029360.1	NP_001029360.1	5	5	5	NP_001029360.1 peptidyl-prolyl cis-trans isomerase-like 1 [Rattus norvegicus]	1	5	5	5	4	4	3	2	2	2	3	2	2	4	4	3	2	2	2	3	2	2	4	4	3	2	2	2	3	2	2	47.6	47.6	47.6	18.251	166	166	1	34	0	99.605	41	47.6	37.3
NP_001029370.1;NP_067703.1	NP_001029370.1;NP_067703.1	6;6	6;6	6;6	NP_001029370.1 transmembrane protein 33 isoform 2 [Rattus norvegicus];NP_067703.1 transmembrane protein 33 isoform 1 [Rattus norvegicus]	2	6	6	6	1	2	2	3	6	4	4	3	2	1	2	2	3	6	4	4	3	2	1	2	2	3	6	4	4	3	2	22.4	22.4	22.4	27.884	246	246;247	1	27	0	23.025	2.8	6.1	6.9
NP_001030083.1;XP_006230251.1	NP_001030083.1;XP_006230251.1	5;4	5;4	5;4	NP_001030083.1 ubiquitin domain-containing protein UBFD1 [Rattus norvegicus];XP_006230251.1 PREDICTED: ubiquitin domain-containing protein UBFD1 isoform X1 [Rattus norvegicus]	2	5	5	5	2	1	2	3	1	1	2	1	2	2	1	2	3	1	1	2	1	2	2	1	2	3	1	1	2	1	2	19.1	19.1	19.1	33.51	309	309;354	1	19	0	8.7423	9.4	5.8	7.4
NP_001030094.1	NP_001030094.1	16	16	16	NP_001030094.1 ATPase family AAA domain-containing protein 3 [Rattus norvegicus]	1	16	16	16	6	7	6	9	7	8	9	10	9	6	7	6	9	7	8	9	10	9	6	7	6	9	7	8	9	10	9	35.4	35.4	35.4	66.758	591	591	1	86	0	201.74	12.4	18.1	16.1
NP_001030110.1	NP_001030110.1	3	3	3	NP_001030110.1 endonuclease G, mitochondrial precursor [Rattus norvegicus]	1	3	3	3	1	0	2	1	1	1	1	0	1	1	0	2	1	1	1	1	0	1	1	0	2	1	1	1	1	0	1	11.2	11.2	11.2	32.267	294	294	1	8	0	4.2498	4.4	0	6.8
NP_001030118.1	NP_001030118.1	11	11	7	NP_001030118.1 intelectin-1 precursor [Rattus norvegicus]	1	11	11	7	9	9	8	7	8	9	7	5	7	9	9	8	7	8	9	7	5	7	6	6	6	4	6	6	5	4	5	47.9	47.9	27.2	34.497	313	313	1	113	0	323.31	36.7	35.5	32.9
NP_001030119.1	NP_001030119.1	1	1	1	NP_001030119.1 tyrosyl-DNA phosphodiesterase 2 [Rattus norvegicus]	1	1	1	1	1	1	0	0	0	0	0	1	1	1	1	0	0	0	0	0	1	1	1	1	0	0	0	0	0	1	1	4.9	4.9	4.9	40.793	366	366	1	4	0	4.5723	4.9	4.9	0
NP_001030123.1	NP_001030123.1	20	20	20	NP_001030123.1 acyl-CoA synthetase family member 2, mitochondrial precursor [Rattus norvegicus]	1	20	20	20	16	15	14	15	17	15	14	14	12	16	15	14	15	17	15	14	14	12	16	15	14	15	17	15	14	14	12	37.9	37.9	37.9	67.886	615	615	1	223	0	323.31	35.3	31.5	26.2
NP_001030124.1	NP_001030124.1	1	1	1	NP_001030124.1 PQ-loop repeat-containing protein 3 precursor [Rattus norvegicus]	1	1	1	1	0	0	0	0	0	0	0	1	0	0	0	0	0	0	0	0	1	0	0	0	0	0	0	0	0	1	0	4.5	4.5	4.5	22.767	202	202	1	1	0.0072981	1.0767	0	0	0
NP_001030131.1	NP_001030131.1	5	5	5	NP_001030131.1 uncharacterized protein C17orf62 homolog [Rattus norvegicus]	1	5	5	5	3	3	2	3	4	3	2	3	3	3	3	2	3	4	3	2	3	3	3	3	2	3	4	3	2	3	3	27.3	27.3	27.3	20.894	187	187	1	29	0	16.23	20.3	17.1	11.2
NP_001030166.1;XP_017455710.1	NP_001030166.1	4;1	4;1	4;1	NP_001030166.1 RWD domain-containing protein 4 [Rattus norvegicus]	2	4	4	4	2	1	2	0	1	2	1	1	1	2	1	2	0	1	2	1	1	1	2	1	2	0	1	2	1	1	1	22.9	22.9	22.9	21.114	188	188;125	1	12	0	5.0441	10.1	4.8	10.1
NP_001030169.1;XP_017449829.1	NP_001030169.1;XP_017449829.1	6;5	6;5	6;5	NP_001030169.1 nuclear receptor-binding protein [Rattus norvegicus];XP_017449829.1 PREDICTED: nuclear receptor-binding protein isoform X1 [Rattus norvegicus]	2	6	6	6	3	4	3	3	4	4	2	4	3	3	4	3	3	4	4	2	4	3	3	4	3	3	4	4	2	4	3	15.7	15.7	15.7	59.792	535	535;543	1	36	0	49.552	8.8	10.7	8
NP_001030326.1	NP_001030326.1	2	2	2	NP_001030326.1 presenilins-associated rhomboid-like protein, mitochondrial precursor [Rattus norvegicus]	1	2	2	2	1	1	1	0	1	2	0	1	1	1	1	1	0	1	2	0	1	1	1	1	1	0	1	2	0	1	1	8.2	8.2	8.2	42.126	377	377	1	11	0	4.8903	2.9	5.3	5.3
NP_001030329.2;XP_003752626.2;XP_006221390.1;XP_008767386.1;XP_008758471.1	NP_001030329.2	6;1;1;1;1	6;1;1;1;1	6;1;1;1;1	NP_001030329.2 myosin regulatory light chain 2, ventricular/cardiac muscle isoform [Rattus norvegicus]	5	6	6	6	1	6	5	0	0	0	0	0	0	1	6	5	0	0	0	0	0	0	1	6	5	0	0	0	0	0	0	54.8	54.8	54.8	18.88	166	166;147;167;232;235	1	14	0	25.648	7.8	54.8	44
NP_001030332.1;XP_008759791.1;XP_008759790.1;XP_006233605.1;XP_006233604.1;XP_006233603.1;XP_008759789.1;XP_006233602.1	NP_001030332.1;XP_008759791.1;XP_008759790.1;XP_006233605.1;XP_006233604.1;XP_006233603.1;XP_008759789.1;XP_006233602.1	5;5;5;5;5;5;5;5	5;5;5;5;5;5;5;5	5;5;5;5;5;5;5;5	NP_001030332.1 serine/arginine-rich splicing factor 11 [Rattus norvegicus];XP_008759791.1 PREDICTED: serine/arginine-rich splicing factor 11 isoform X6 [Rattus norvegicus];XP_008759790.1 PREDICTED: serine/arginine-rich splicing factor 11 isoform X5 [Rattus	8	5	5	5	3	2	4	3	3	4	3	3	2	3	2	4	3	3	4	3	3	2	3	2	4	3	3	4	3	3	2	15.8	15.8	15.8	53.099	476	476;483;497;497;510;511;517;518	1	33	0	47.216	8.2	6.1	12.2
NP_001030334.1	NP_001030334.1	5	5	5	NP_001030334.1 ubiquinone biosynthesis protein COQ9, mitochondrial precursor [Rattus norvegicus]	1	5	5	5	4	3	3	4	4	3	2	4	4	4	3	3	4	4	3	2	4	4	4	3	3	4	4	3	2	4	4	26.9	26.9	26.9	35.145	312	312	1	45	0	115.51	19.2	16	16
NP_001030594.1	NP_001030594.1	3	3	3	NP_001030594.1 RUS1 family protein C16orf58 homolog [Rattus norvegicus]	1	3	3	3	1	0	1	1	1	1	0	1	1	1	0	1	1	1	1	0	1	1	1	0	1	1	1	1	0	1	1	9.7	9.7	9.7	50.779	466	466	1	7	0	10.577	5.4	0	2.8
NP_001032170.2;XP_006236087.1;XP_006236085.1;XP_008760908.1;XP_017447937.1;XP_017447936.1;XP_017447935.1;XP_008760907.1	NP_001032170.2;XP_006236087.1;XP_006236085.1;XP_008760908.1;XP_017447937.1;XP_017447936.1;XP_017447935.1;XP_008760907.1	45;45;45;45;44;44;44;44	45;45;45;45;44;44;44;44	45;45;45;45;44;44;44;44	NP_001032170.2 A-kinase anchor protein 9 [Rattus norvegicus];XP_006236087.1 PREDICTED: A-kinase anchor protein 9 isoform X7 [Rattus norvegicus];XP_006236085.1 PREDICTED: A-kinase anchor protein 9 isoform X5 [Rattus norvegicus];XP_008760908.1 PREDICTED: A-k	8	45	45	45	12	12	7	12	13	13	10	12	9	12	12	7	12	13	13	10	12	9	12	12	7	12	13	13	10	12	9	15.4	15.4	15.4	433.94	3771	3771;3816;3834;3859;3825;3847;3854;3872	1	103	0	93.151	4.2	4.7	2.8
NP_001032171.1	NP_001032171.1	1	1	1	NP_001032171.1 cytoplasmic tRNA 2-thiolation protein 2 [Rattus norvegicus]	1	1	1	1	0	0	1	0	1	1	0	1	1	0	0	1	0	1	1	0	1	1	0	0	1	0	1	1	0	1	1	2.8	2.8	2.8	57.74	528	528	1	5	0	5.8973	0	0	2.8
NP_001032172.1	NP_001032172.1	10	10	10	NP_001032172.1 oxygen-dependent coproporphyrinogen-III oxidase, mitochondrial precursor [Rattus norvegicus]	1	10	10	10	4	9	8	3	5	3	6	5	5	4	9	8	3	5	3	6	5	5	4	9	8	3	5	3	6	5	5	24.6	24.6	24.6	49.278	443	443	1	58	0	60.377	11.7	24.4	22.1
NP_001032174.1;XP_008763045.2	NP_001032174.1;XP_008763045.2	9;9	9;9	9;9	NP_001032174.1 serine palmitoyltransferase 2 [Rattus norvegicus];XP_008763045.2 PREDICTED: serine palmitoyltransferase 2 isoform X1 [Rattus norvegicus]	2	9	9	9	1	1	1	2	3	3	3	2	4	1	1	1	2	3	3	3	2	4	1	1	1	2	3	3	3	2	4	23.8	23.8	23.8	62.961	560	560;561	1	25	0	48.568	3.9	2.5	3.9
NP_001032257.1	NP_001032257.1	4	4	4	NP_001032257.1 peptidyl-prolyl cis-trans isomerase FKBP8 [Rattus norvegicus]	1	4	4	4	1	2	2	2	2	2	3	3	2	1	2	2	2	2	2	3	3	2	1	2	2	2	2	2	3	3	2	18.6	18.6	18.6	43.555	403	403	1	19	0	59.727	4	10.7	11.2
NP_001032260.1;XP_008759134.1	NP_001032260.1;XP_008759134.1	4;2	4;2	4;2	NP_001032260.1 39S ribosomal protein L47, mitochondrial [Rattus norvegicus];XP_008759134.1 PREDICTED: 39S ribosomal protein L47, mitochondrial isoform X1 [Rattus norvegicus]	2	4	4	4	1	4	3	2	1	1	1	0	0	1	4	3	2	1	1	1	0	0	1	4	3	2	1	1	1	0	0	19.4	19.4	19.4	29.616	252	252;140	1	13	0	11.991	4.4	19.4	15.5
NP_001032263.1	NP_001032263.1	3	3	3	NP_001032263.1 solute carrier family 25 member 40 [Rattus norvegicus]	1	3	3	3	2	2	0	1	2	1	0	2	1	2	2	0	1	2	1	0	2	1	2	2	0	1	2	1	0	2	1	9.3	9.3	9.3	41.02	367	367	1	11	0	6.744	6.5	6.5	0
NP_001032264.1;XP_008771390.1;XP_006256952.1	NP_001032264.1;XP_008771390.1;XP_006256952.1	2;2;2	2;2;2	2;2;2	NP_001032264.1 gamma-taxilin [Rattus norvegicus];XP_008771390.1 PREDICTED: gamma-taxilin isoform X2 [Rattus norvegicus];XP_006256952.1 PREDICTED: gamma-taxilin isoform X1 [Rattus norvegicus]	3	2	2	2	0	0	0	1	0	1	1	1	0	0	0	0	1	0	1	1	1	0	0	0	0	1	0	1	1	1	0	10.5	10.5	10.5	35.471	315	315;400;530	1	4	0.00055026	2.3073	0	0	0
NP_001032278.1;XP_017457765.1;XP_008756606.1	NP_001032278.1;XP_017457765.1;XP_008756606.1	22;18;18	22;18;18	22;18;18	NP_001032278.1 nucleolar RNA helicase 2 [Rattus norvegicus];XP_017457765.1 PREDICTED: LOW QUALITY PROTEIN: nucleolar RNA helicase 2-like isoform X1 [Rattus norvegicus];XP_008756606.1 PREDICTED: LOW QUALITY PROTEIN: nucleolar RNA helicase 2-like isoform X2	3	22	22	22	8	8	7	9	9	9	12	13	13	8	8	7	9	9	9	12	13	13	8	8	7	9	9	9	12	13	13	33.1	33.1	33.1	85.965	782	782;781;781	1	117	0	187.21	13.3	14.6	14.5
NP_001032282.1;XP_008768187.1;NP_001014155.1	NP_001032282.1;XP_008768187.1;NP_001014155.1	4;3;2	1;1;1	1;1;1	NP_001032282.1 ATP-binding cassette, subfamily G (WHITE), member 3-like 4 [Rattus norvegicus];XP_008768187.1 PREDICTED: ATP-binding cassette sub-family G member 3-like [Rattus norvegicus];NP_001014155.1 ATP-binding cassette, subfamily G (WHITE), member 3-l	3	4	1	1	2	2	3	1	1	0	1	3	2	1	1	1	0	0	0	0	1	1	1	1	1	0	0	0	0	1	1	8.1	2	2	73.899	652	652;383;502	1	5	0.00071454	1.9466	3.5	3.5	7.1
NP_001032283.1	NP_001032283.1	7	7	7	NP_001032283.1 valacyclovir hydrolase precursor [Rattus norvegicus]	1	7	7	7	3	1	2	3	2	3	2	1	0	3	1	2	3	2	3	2	1	0	3	1	2	3	2	3	2	1	0	29.6	29.6	29.6	32.822	291	291	1	19	0	14.468	13.4	4.8	7.9
NP_001032287.1;XP_008759774.1	NP_001032287.1;XP_008759774.1	11;8	11;8	11;8	NP_001032287.1 PDZ domain-containing protein GIPC2 [Rattus norvegicus];XP_008759774.1 PREDICTED: PDZ domain-containing protein GIPC2 isoform X1 [Rattus norvegicus]	2	11	11	11	4	3	5	4	5	5	4	6	5	4	3	5	4	5	5	4	6	5	4	3	5	4	5	5	4	6	5	37.6	37.6	37.6	34.202	314	314;313	1	47	0	48.855	17.5	14.3	19.4
NP_001032292.1	NP_001032292.1	4	4	4	NP_001032292.1 adenosine 3-phospho 5-phosphosulfate transporter 1 precursor [Rattus norvegicus]	1	4	4	4	2	0	1	2	1	2	2	1	2	2	0	1	2	1	2	2	1	2	2	0	1	2	1	2	2	1	2	9.5	9.5	9.5	47.297	431	431	1	13	0	4.5239	4.9	0	2.3
NP_001032296.2;NP_001100545.1;XP_006247953.1;XP_006247952.1	NP_001032296.2	5;1;1;1	5;1;1;1	5;1;1;1	NP_001032296.2 forkhead box protein K1 [Rattus norvegicus]	4	5	5	5	0	0	0	0	1	0	1	2	1	0	0	0	0	1	0	1	2	1	0	0	0	0	1	0	1	2	1	5.7	5.7	5.7	75.074	719	719;400;580;650	1	5	0.00054615	2.2157	0	0	0
NP_001032415.1	NP_001032415.1	6	6	6	NP_001032415.1 NADH dehydrogenase [ubiquinone] 1 beta subcomplex subunit 4 [Rattus norvegicus]	1	6	6	6	1	3	3	4	4	3	4	4	3	1	3	3	4	4	3	4	4	3	1	3	3	4	4	3	4	4	3	46.5	46.5	46.5	15.064	129	129	1	33	0	15.55	8.5	27.1	27.1
NP_001032424.2;NP_620794.1	NP_001032424.2;NP_620794.1	4;2	4;2	2;0	NP_001032424.2 splicing factor, arginine/serine-rich 15 [Rattus norvegicus];NP_620794.1 protein SCAF8 [Rattus norvegicus]	2	4	4	2	2	1	1	1	1	1	0	1	3	2	1	1	1	1	1	0	1	3	1	0	0	0	0	0	0	0	1	5.3	5.3	3.8	130.9	1200	1200;1268	1	12	0	6.3541	3.1	1	1
NP_001032425.1;XP_006248925.1	NP_001032425.1;XP_006248925.1	7;6	7;6	7;6	NP_001032425.1 aminoacyl tRNA synthase complex-interacting multifunctional protein 2 [Rattus norvegicus];XP_006248925.1 PREDICTED: aminoacyl tRNA synthase complex-interacting multifunctional protein 2 isoform X1 [Rattus norvegicus]	2	7	7	7	5	6	4	3	4	4	2	4	4	5	6	4	3	4	4	2	4	4	5	6	4	3	4	4	2	4	4	33.4	33.4	33.4	35.442	320	320;280	1	51	0	198.38	28.4	30.9	26.6
NP_001032426.1;XP_008758622.1;XP_008758623.1	NP_001032426.1;XP_008758622.1;XP_008758623.1	3;2;2	3;2;2	3;2;2	NP_001032426.1 biogenesis of lysosome-related organelles complex-1 subunit 2 [Rattus norvegicus];XP_008758622.1 PREDICTED: biogenesis of lysosome-related organelles complex-1 subunit 2 isoform X1 [Rattus norvegicus];XP_008758623.1 PREDICTED: biogenesis of	3	3	3	3	0	0	3	0	1	1	2	1	0	0	0	3	0	1	1	2	1	0	0	0	3	0	1	1	2	1	0	38.7	38.7	38.7	16.067	142	142;99;168	1	8	0	5.3287	0	0	38.7
NP_001032430.1;XP_017448146.1	NP_001032430.1;XP_017448146.1	4;3	4;3	4;3	NP_001032430.1 transcription factor ETV6 [Rattus norvegicus];XP_017448146.1 PREDICTED: transcription factor ETV6 isoform X1 [Rattus norvegicus]	2	4	4	4	2	0	1	1	1	1	1	3	4	2	0	1	1	1	1	1	3	4	2	0	1	1	1	1	1	3	4	9.3	9.3	9.3	53.029	453	453;365	1	14	0	5.1178	5.5	0	4
NP_001032432.1	NP_001032432.1	6	6	3	NP_001032432.1 methyltransferase-like protein 7A [Rattus norvegicus]	1	6	6	3	5	5	4	4	5	5	4	6	4	5	5	4	4	5	5	4	6	4	2	2	1	2	3	3	2	3	1	34.8	34.8	20.5	28.142	244	244	1	65	0	69.727	31.1	31.1	21.7
NP_001032437.1	NP_001032437.1	4	4	4	NP_001032437.1 zinc finger protein 830 [Rattus norvegicus]	1	4	4	4	0	0	0	1	0	2	2	3	2	0	0	0	1	0	2	2	3	2	0	0	0	1	0	2	2	3	2	15.9	15.9	15.9	41.616	370	370	1	10	0	10.501	0	0	0
NP_001032439.1;XP_006253625.1	NP_001032439.1;XP_006253625.1	1;1	1;1	1;1	NP_001032439.1 probable gluconokinase [Rattus norvegicus];XP_006253625.1 PREDICTED: probable gluconokinase isoform X1 [Rattus norvegicus]	2	1	1	1	1	1	1	1	1	0	0	1	0	1	1	1	1	1	0	0	1	0	1	1	1	1	1	0	0	1	0	7.6	7.6	7.6	20.21	185	185;196	1	8	0.00071595	1.9628	7.6	7.6	7.6
NP_001032633.1	NP_001032633.1	1	1	1	NP_001032633.1 sodium- and chloride-dependent neutral and basic amino acid transporter B(0+) [Rattus norvegicus]	1	1	1	1	1	0	0	0	0	0	1	1	1	1	0	0	0	0	0	1	1	1	1	0	0	0	0	0	1	1	1	3	3	3	71.842	640	640	1	4	0.00019627	3.2135	3	0	0
NP_001032732.2	NP_001032732.2	6	6	6	NP_001032732.2 ubiquitin-conjugating enzyme E2 Z [Rattus norvegicus]	1	6	6	6	4	1	2	2	4	3	2	3	3	4	1	2	2	4	3	2	3	3	4	1	2	2	4	3	2	3	3	24.2	24.2	24.2	38.352	356	356	1	30	0	53.867	19.1	4.2	11
NP_001032734.1;XP_006251945.1	NP_001032734.1;XP_006251945.1	6;5	2;2	2;2	NP_001032734.1 ras-related protein Rab-2B [Rattus norvegicus];XP_006251945.1 PREDICTED: ras-related protein Rab-2B isoform X1 [Rattus norvegicus]	2	6	2	2	5	5	6	5	5	5	4	5	5	1	1	2	1	1	1	1	1	1	1	1	2	1	1	1	1	1	1	36.7	14	14	24.085	215	215;225	1	17	0	21.661	30.2	30.2	36.7
NP_001032742.1;XP_008759779.1;XP_006233575.1;XP_008759778.1;XP_008759777.1;XP_006233574.1;XP_006233573.1;XP_008759776.1;XP_008759775.1;XP_006233569.1	NP_001032742.1;XP_008759779.1;XP_006233575.1;XP_008759778.1;XP_008759777.1;XP_006233574.1;XP_006233573.1;XP_008759776.1;XP_008759775.1;XP_006233569.1	17;17;17;17;17;17;17;17;17;17	13;13;13;13;13;13;13;13;13;13	13;13;13;13;13;13;13;13;13;13	NP_001032742.1 far upstream element-binding protein 1 [Rattus norvegicus];XP_008759779.1 PREDICTED: far upstream element-binding protein 1 isoform X9 [Rattus norvegicus];XP_006233575.1 PREDICTED: far upstream element-binding protein 1 isoform X8 [Rattus no	10	17	13	13	9	10	8	10	9	10	12	11	10	7	8	7	9	8	9	11	10	9	7	8	7	9	8	9	11	10	9	31.3	27.7	27.7	67.196	639	639;650;651;653;654;661;664;672;674;675	1	91	0	180.49	16.3	20.7	21
NP_001032748.1	NP_001032748.1	11	11	11	NP_001032748.1 55 kDa erythrocyte membrane protein [Rattus norvegicus]	1	11	11	11	6	4	4	5	6	6	7	7	8	6	4	4	5	6	6	7	7	8	6	4	4	5	6	6	7	7	8	32.1	32.1	32.1	50.892	467	467	1	65	0	87.058	17.3	12.8	12
NP_001032855.2	NP_001032855.2	64	64	64	NP_001032855.2 U5 small nuclear ribonucleoprotein 200 kDa helicase [Rattus norvegicus]	1	64	64	64	32	35	32	27	31	33	31	36	32	32	35	32	27	31	33	31	36	32	32	35	32	27	31	33	31	36	32	38.6	38.6	38.6	244.53	2136	2136	1	350	0	323.31	22.4	24	22.4
NP_001032856.2	NP_001032856.2	4	4	4	NP_001032856.2 actin-related protein 2/3 complex subunit 5-like protein [Rattus norvegicus]	1	4	4	4	1	3	4	1	2	2	3	3	3	1	3	4	1	2	2	3	3	3	1	3	4	1	2	2	3	3	3	34	34	34	17.01	153	153	1	28	0	48.52	7.8	25.5	34
NP_001032857.1;XP_006236802.1	NP_001032857.1;XP_006236802.1	10;7	10;7	10;7	NP_001032857.1 N-acetyl-D-glucosamine kinase [Rattus norvegicus];XP_006236802.1 PREDICTED: N-acetyl-D-glucosamine kinase isoform X1 [Rattus norvegicus]	2	10	10	10	7	6	3	7	5	5	4	6	5	7	6	3	7	5	5	4	6	5	7	6	3	7	5	5	4	6	5	32.4	32.4	32.4	37.196	343	343;333	1	60	0	91.249	25.1	23	12.2
NP_001032859.1	NP_001032859.1	4	4	4	NP_001032859.1 F-box only protein 22 [Rattus norvegicus]	1	4	4	4	2	1	1	3	0	0	2	1	2	2	1	1	3	0	0	2	1	2	2	1	1	3	0	0	2	1	2	12	12	12	44.008	399	399	1	12	0	9.9935	6	2	2.5
NP_001032863.1	NP_001032863.1	1	1	1	NP_001032863.1 claudin-8 [Rattus norvegicus]	1	1	1	1	0	0	0	0	0	0	0	0	1	0	0	0	0	0	0	0	0	1	0	0	0	0	0	0	0	0	1	5.3	5.3	5.3	24.948	225	225	1	1	0.003395	1.3434	0	0	0
NP_001032869.2	NP_001032869.2	14	14	14	NP_001032869.2 integrin beta-2 precursor [Rattus norvegicus]	1	14	14	14	7	5	4	3	5	4	5	5	6	7	5	4	3	5	4	5	5	6	7	5	4	3	5	4	5	5	6	22.9	22.9	22.9	84.817	768	768	1	50	0	77.994	11.5	9	8.2
NP_001032878.1;XP_006227723.1;XP_006227722.1	NP_001032878.1;XP_006227723.1;XP_006227722.1	2;1;1	2;1;1	2;1;1	NP_001032878.1 coiled-coil domain-containing protein 28A [Rattus norvegicus];XP_006227723.1 PREDICTED: coiled-coil domain-containing protein 28A isoform X1 [Rattus norvegicus];XP_006227722.1 PREDICTED: coiled-coil domain-containing protein 28A isoform X1 [	3	2	2	2	2	0	0	0	0	0	0	0	1	2	0	0	0	0	0	0	0	1	2	0	0	0	0	0	0	0	1	15.2	15.2	15.2	20.28	184	184;192;192	1	3	0.0005425	2.1262	15.2	0	0
NP_001032884.1	NP_001032884.1	2	2	2	NP_001032884.1 protein FMC1 homolog [Rattus norvegicus]	1	2	2	2	1	0	1	0	1	1	1	2	0	1	0	1	0	1	1	1	2	0	1	0	1	0	1	1	1	2	0	27.4	27.4	27.4	12.744	113	113	1	7	0	5.509	17.7	0	17.7
NP_001033584.1	NP_001033584.1	1	1	1	NP_001033584.1 ubiquitin-like protein ATG12 [Rattus norvegicus]	1	1	1	1	1	1	0	0	0	0	1	0	1	1	1	0	0	0	0	1	0	1	1	1	0	0	0	0	1	0	1	7.1	7.1	7.1	15.283	141	141	1	4	0.00072046	2.0539	7.1	7.1	0
NP_001033680.1	NP_001033680.1	1	1	1	NP_001033680.1 inhibitor of growth protein 1 [Rattus norvegicus]	1	1	1	1	0	0	0	1	0	0	1	0	0	0	0	0	1	0	0	1	0	0	0	0	0	1	0	0	1	0	0	5	5	5	32.121	279	279	1	2	0.00071378	1.9287	0	0	0
NP_001033685.1	NP_001033685.1	8	1	1	NP_001033685.1 dnaJ homolog subfamily A member 3, mitochondrial isoform 2 [Rattus norvegicus]	1	8	1	1	3	5	4	3	7	5	3	5	7	0	1	0	0	1	0	0	1	0	0	1	0	0	1	0	0	1	0	29.6	6.4	6.4	49.412	453	453	1	3	0	7.3397	11.3	18.8	12.4
NP_001034090.1	NP_001034090.1	29	29	29	NP_001034090.1 heat shock protein 75 kDa, mitochondrial precursor [Rattus norvegicus]	1	29	29	29	15	13	13	12	15	11	19	19	14	15	13	13	12	15	11	19	19	14	15	13	13	12	15	11	19	19	14	45.6	45.6	45.6	80.46	706	706	1	161	0	238.54	28.2	26.3	23.7
NP_001034092.1;XP_006227876.1;XP_006227875.1	NP_001034092.1;XP_006227876.1;XP_006227875.1	2;2;2	2;2;2	2;2;2	NP_001034092.1 methionine synthase reductase [Rattus norvegicus];XP_006227876.1 PREDICTED: methionine synthase reductase isoform X2 [Rattus norvegicus];XP_006227875.1 PREDICTED: methionine synthase reductase isoform X1 [Rattus norvegicus]	3	2	2	2	0	0	0	0	1	2	1	1	2	0	0	0	0	1	2	1	1	2	0	0	0	0	1	2	1	1	2	5.5	5.5	5.5	56.53	506	506;577;700	1	7	0	5.0651	0	0	0
NP_001034093.1;XP_006255194.1	NP_001034093.1;XP_006255194.1	11;11	11;11	11;11	NP_001034093.1 cleavage and polyadenylation specificity factor subunit 5 [Rattus norvegicus];XP_006255194.1 PREDICTED: cleavage and polyadenylation specificity factor subunit 5 isoform X1 [Rattus norvegicus]	2	11	11	11	6	8	7	6	8	7	6	7	7	6	8	7	6	8	7	6	7	7	6	8	7	6	8	7	6	7	7	58.1	58.1	58.1	26.24	227	227;232	1	80	0	74.194	36.1	47.6	46.3
NP_001034099.2;XP_008762221.1;XP_008762220.1;XP_008762222.1	NP_001034099.2;XP_008762221.1;XP_008762220.1	6;3;3;2	6;3;3;2	6;3;3;2	NP_001034099.2 phosphopantothenate--cysteine ligase [Rattus norvegicus];XP_008762221.1 PREDICTED: phosphopantothenate--cysteine ligase isoform X1 [Rattus norvegicus];XP_008762220.1 PREDICTED: phosphopantothenate--cysteine ligase isoform X1 [Rattus norvegic	4	6	6	6	1	4	1	1	2	2	2	2	2	1	4	1	1	2	2	2	2	2	1	4	1	1	2	2	2	2	2	24.8	24.8	24.8	33.908	311	311;138;138;114	1	17	0	10.459	5.5	12.9	2.3
NP_001034100.1	NP_001034100.1	1	1	1	NP_001034100.1 connector enhancer of kinase suppressor of ras 1 [Rattus norvegicus]	1	1	1	1	0	0	0	0	0	0	0	1	1	0	0	0	0	0	0	0	1	1	0	0	0	0	0	0	0	1	1	2.8	2.8	2.8	78.456	704	704	1	2	0.0032495	1.4121	0	0	0
NP_001034101.1	NP_001034101.1	3	3	3	NP_001034101.1 protein RER1 [Rattus norvegicus]	1	3	3	3	3	3	3	1	3	3	1	3	3	3	3	3	1	3	3	1	3	3	3	3	3	1	3	3	1	3	3	24.5	24.5	24.5	22.988	196	196	1	36	0	102.36	24.5	24.5	24.5
NP_001034109.1;XP_006247064.1;XP_008766284.1;XP_008766283.1;XP_006247063.1	NP_001034109.1;XP_006247064.1;XP_008766284.1;XP_008766283.1;XP_006247063.1	4;4;4;4;4	4;4;4;4;4	4;4;4;4;4	NP_001034109.1 BUB3-interacting and GLEBS motif-containing protein ZNF207 [Rattus norvegicus];XP_006247064.1 PREDICTED: BUB3-interacting and GLEBS motif-containing protein ZNF207 isoform X3 [Rattus norvegicus];XP_008766284.1 PREDICTED: BUB3-interacting and	5	4	4	4	2	1	1	3	1	1	2	2	2	2	1	1	3	1	1	2	2	2	2	1	1	3	1	1	2	2	2	10.3	10.3	10.3	49.777	464	464;476;479;495;495	1	17	0	7.4551	5.6	2.8	2.8
NP_001034111.1	NP_001034111.1	7	7	7	NP_001034111.1 2-methoxy-6-polyprenyl-1,4-benzoquinol methylase, mitochondrial precursor [Rattus norvegicus]	1	7	7	7	2	3	1	0	3	1	1	4	2	2	3	1	0	3	1	1	4	2	2	3	1	0	3	1	1	4	2	27.5	27.5	27.5	37.3	327	327	1	18	0	40.282	11	14.7	6.7
NP_001034114.2	NP_001034114.2	118	1	1	NP_001034114.2 talin-1 [Rattus norvegicus]	1	118	1	1	97	88	80	89	80	74	73	74	74	1	1	1	1	1	1	1	1	1	1	1	1	1	1	1	1	1	1	54.9	1.5	1.5	269.67	2541	2541	1	21	0	227.42	48.4	46.8	44
NP_001034116.1;XP_006240968.1	NP_001034116.1;XP_006240968.1	8;7	8;7	8;7	NP_001034116.1 WD repeat-containing protein 18 [Rattus norvegicus];XP_006240968.1 PREDICTED: WD repeat-containing protein 18 isoform X1 [Rattus norvegicus]	2	8	8	8	3	4	2	2	1	3	2	5	3	3	4	2	2	1	3	2	5	3	3	4	2	2	1	3	2	5	3	21.6	21.6	21.6	47.225	431	431;354	1	30	0	46.961	7.2	13.5	6.3
NP_001034117.2	NP_001034117.2	14	6	6	NP_001034117.2 beta-centractin [Rattus norvegicus]	1	14	6	6	10	9	9	10	8	10	8	9	6	5	4	3	2	5	5	4	4	4	5	4	3	2	5	5	4	4	4	56.1	30.3	30.3	42.281	376	376	1	76	0	299.04	44.9	40.4	37.8
NP_001034122.1;XP_006232315.1;NP_001099387.2;XP_006249182.1	NP_001034122.1;XP_006232315.1	13;10;2;2	13;10;2;2	13;10;2;2	NP_001034122.1 actin-like protein 6A [Rattus norvegicus];XP_006232315.1 PREDICTED: actin-like protein 6A isoform X1 [Rattus norvegicus]	4	13	13	13	6	7	6	6	9	8	6	8	8	6	7	6	6	9	8	6	8	8	6	7	6	6	9	8	6	8	8	45.7	45.7	45.7	47.42	429	429;377;426;444	1	93	0	235.27	23.3	29.8	25.6
NP_001034125.1;XP_017447473.1;XP_008760412.1;XP_017447472.1;XP_017447471.1;XP_008760411.1;XP_006254137.1;NP_001128487.1	NP_001034125.1;XP_017447473.1;XP_008760412.1;XP_017447472.1;XP_017447471.1;XP_008760411.1;XP_006254137.1;NP_001128487.1	1;1;1;1;1;1;1;1	1;1;1;1;1;1;1;1	1;1;1;1;1;1;1;1	NP_001034125.1 GA-binding protein subunit beta-1 [Rattus norvegicus];XP_017447473.1 PREDICTED: GA-binding protein subunit beta-1 isoform X4 [Rattus norvegicus];XP_008760412.1 PREDICTED: GA-binding protein subunit beta-1 isoform X3 [Rattus norvegicus];XP_01	8	1	1	1	0	1	0	0	0	0	0	0	0	0	1	0	0	0	0	0	0	0	0	1	0	0	0	0	0	0	0	6.6	6.6	6.6	31.964	304	304;318;349;382;383;383;383;383	1	1	0.0042194	1.2679	0	6.6	0
NP_001034286.1	NP_001034286.1	6	6	6	NP_001034286.1 torsin-1B precursor [Rattus norvegicus]	1	6	6	6	3	2	1	0	2	2	1	1	3	3	2	1	0	2	2	1	1	3	3	2	1	0	2	2	1	1	3	25.3	25.3	25.3	37.857	336	336	1	16	0	7.5633	14.9	8	3.9
NP_001034433.1;NP_001107222.1;XP_017443800.1;XP_008756767.1;XP_001061554.2	NP_001034433.1	15;1;1;1;1	15;1;1;1;1	15;1;1;1;1	NP_001034433.1 testin [Rattus norvegicus]	5	15	15	15	9	7	6	12	7	8	9	6	8	9	7	6	12	7	8	9	6	8	9	7	6	12	7	8	9	6	8	31.7	31.7	31.7	47.632	419	419;406;410;411;411	1	101	0	323.31	22.7	19.8	17.2
NP_001034467.1	NP_001034467.1	2	2	2	NP_001034467.1 trafficking protein particle complex subunit 1 [Rattus norvegicus]	1	2	2	2	1	1	0	0	0	1	0	1	1	1	1	0	0	0	1	0	1	1	1	1	0	0	0	1	0	1	1	14.5	14.5	14.5	16.881	145	145	1	6	0.00019849	3.4043	6.9	7.6	0
NP_001034638.1;NP_958828.1;NP_787040.2;NP_958827.1;NP_958826.1;XP_017460259.1;XP_017454884.1;XP_017454883.1;XP_017454638.1;XP_017454637.1;NP_695226.2;NP_001007265.3;NP_001004271.1	NP_001034638.1;NP_958828.1;NP_787040.2;NP_958827.1;NP_958826.1	6;5;5;5;5;1;1;1;1;1;1;1;1	1;0;0;0;0;0;0;0;0;0;0;0;0	1;0;0;0;0;0;0;0;0;0;0;0;0	NP_001034638.1 UDP-glucuronosyltransferase 1-5 precursor [Rattus norvegicus];NP_958828.1 UDP glycosyltransferase 1 family, polypeptide A10 precursor [Rattus norvegicus];NP_787040.2 UDP-glucuronosyltransferase 1-8 precursor [Rattus norvegicus];NP_958827.1 U	13	6	1	1	4	4	2	3	4	4	4	4	4	0	1	0	0	0	0	0	0	0	0	1	0	0	0	0	0	0	0	14.3	3.2	3.2	59.921	531	531;530;530;531;533;280;442;442;530;530;530;530;530	1	1	1	-2	8.9	11.3	4.1
NP_001034695.1	NP_001034695.1	18	18	18	NP_001034695.1 GDP-mannose 4,6 dehydratase [Rattus norvegicus]	1	18	18	18	13	11	11	15	11	12	11	10	11	13	11	11	15	11	12	11	10	11	13	11	11	15	11	12	11	10	11	50.3	50.3	50.3	42.094	372	372	1	172	0	319.76	41.9	40.3	39.8
NP_001034698.1	NP_001034698.1	8	8	8	NP_001034698.1 formin-binding protein 1-like [Rattus norvegicus]	1	8	8	8	3	3	5	2	3	4	1	3	2	3	3	5	2	3	4	1	3	2	3	3	5	2	3	4	1	3	2	20.5	20.5	20.5	70.434	609	609	1	27	0	19.553	8.4	6.1	14
NP_001034802.1	NP_001034802.1	4	4	4	NP_001034802.1 alpha-ketoglutarate-dependent dioxygenase FTO [Rattus norvegicus]	1	4	4	4	2	3	2	1	0	0	1	2	0	2	3	2	1	0	0	1	2	0	2	3	2	1	0	0	1	2	0	11.8	11.8	11.8	57.971	502	502	1	13	0	13.256	5.6	8.8	5.6
NP_001035108.1;NP_036621.1;XP_017451641.1	NP_001035108.1;NP_036621.1	13;13;4	13;13;4	13;13;4	NP_001035108.1 3-ketoacyl-CoA thiolase B, peroxisomal precursor [Rattus norvegicus];NP_036621.1 3-ketoacyl-CoA thiolase A, peroxisomal [Rattus norvegicus]	3	13	13	13	7	11	8	6	12	10	9	11	11	7	11	8	6	12	10	9	11	11	7	11	8	6	12	10	9	11	11	36.3	36.3	36.3	43.776	424	424;434;432	1	122	0	323.31	28.8	31.6	23.3
NP_001035244.2;XP_008768059.1;XP_008768058.1;XP_017454230.1;XP_017454229.1	NP_001035244.2;XP_008768059.1;XP_008768058.1;XP_017454230.1;XP_017454229.1	12;11;11;11;11	12;11;11;11;11	12;11;11;11;11	NP_001035244.2 rab3 GTPase-activating protein non-catalytic subunit [Rattus norvegicus];XP_008768059.1 PREDICTED: rab3 GTPase-activating protein non-catalytic subunit isoform X3 [Rattus norvegicus];XP_008768058.1 PREDICTED: rab3 GTPase-activating protein n	5	12	12	12	6	3	4	2	9	5	2	5	6	6	3	4	2	9	5	2	5	6	6	3	4	2	9	5	2	5	6	10.7	10.7	10.7	154.51	1387	1387;1116;1280;1300;1300	1	45	0	56.134	6.3	3.4	3.8
NP_001035266.2	NP_001035266.2	19	19	19	NP_001035266.2 protein MON2 homolog [Rattus norvegicus]	1	19	19	19	7	12	8	9	10	8	6	8	9	7	12	8	9	10	8	6	8	9	7	12	8	9	10	8	6	8	9	13.9	13.9	13.9	188.49	1708	1708	1	84	0	80.833	5.6	8.7	6.1
NP_001035361.1;NP_446044.1;XP_008760410.1	NP_001035361.1;NP_446044.1;XP_008760410.1	5;5;4	5;5;4	5;5;4	NP_001035361.1 deoxyuridine 5-triphosphate nucleotidohydrolase isoform 2 [Rattus norvegicus];NP_446044.1 deoxyuridine 5-triphosphate nucleotidohydrolase isoform 1 [Rattus norvegicus];XP_008760410.1 PREDICTED: deoxyuridine 5-triphosphate nucleotidohydrol	3	5	5	5	4	1	3	0	3	3	2	3	4	4	1	3	0	3	3	2	3	4	4	1	3	0	3	3	2	3	4	45.3	45.3	45.3	17.466	161	161;205;166	1	26	0	61.131	34.8	10.6	27.3
NP_001036044.1;NP_074053.1	NP_001036044.1;NP_074053.1	1;1	1;1	1;1	NP_001036044.1 protein unc-13 homolog B isoform u [Rattus norvegicus];NP_074053.1 protein unc-13 homolog B isoform b [Rattus norvegicus]	2	1	1	1	1	1	1	1	1	1	1	1	1	1	1	1	1	1	1	1	1	1	1	1	1	1	1	1	1	1	1	0.7	0.7	0.7	184.06	1622	1622;1985	1	9	0.0099559	0.88584	0.7	0.7	0.7
NP_001037690.1;XP_017453783.1;XP_008767284.1;XP_008767283.1	NP_001037690.1;XP_017453783.1;XP_008767284.1;XP_008767283.1	2;2;2;2	2;2;2;2	2;2;2;2	NP_001037690.1 transcription initiation factor TFIID subunit 6 [Rattus norvegicus];XP_017453783.1 PREDICTED: transcription initiation factor TFIID subunit 6 isoform X1 [Rattus norvegicus];XP_008767284.1 PREDICTED: transcription initiation factor TFIID subu	4	2	2	2	0	0	0	0	0	0	0	2	1	0	0	0	0	0	0	0	2	1	0	0	0	0	0	0	0	2	1	4.3	4.3	4.3	71.201	647	647;678;678;678	1	3	0.00019794	3.3583	0	0	0
NP_001037699.2	NP_001037699.2	3	3	3	NP_001037699.2 oxysterol-binding protein-related protein 9 [Rattus norvegicus]	1	3	3	3	0	1	0	0	1	1	0	1	0	0	1	0	0	1	1	0	1	0	0	1	0	0	1	1	0	1	0	4.4	4.4	4.4	81.702	723	723	1	4	0.0014065	1.7281	0	1.5	0
NP_001037703.1	NP_001037703.1	3	3	3	NP_001037703.1 lysophospholipase D GDPD1 [Rattus norvegicus]	1	3	3	3	2	1	1	1	0	1	0	0	0	2	1	1	1	0	1	0	0	0	2	1	1	1	0	1	0	0	0	14	14	14	35.81	314	314	1	6	0	4.2879	8.9	5.1	5.1
NP_001037704.1	NP_001037704.1	11	8	8	NP_001037704.1 AP-1 complex subunit mu-1 [Rattus norvegicus]	1	11	8	8	4	4	4	1	3	7	3	4	4	4	4	3	1	1	4	1	2	2	4	4	3	1	1	4	1	2	2	36.9	30.3	30.3	48.556	423	423	1	25	0	24.849	15.6	12.8	11.1
NP_001037707.1	NP_001037707.1	11	11	11	NP_001037707.1 pyruvate dehydrogenase protein X component, mitochondrial [Rattus norvegicus]	1	11	11	11	6	6	4	5	4	5	8	5	5	6	6	4	5	4	5	8	5	5	6	6	4	5	4	5	8	5	5	23.7	23.7	23.7	58.796	539	539	1	58	0	40.738	13.9	13.9	8.9
NP_001037715.1	NP_001037715.1	11	11	11	NP_001037715.1 signal transducer and activator of transcription 6 [Rattus norvegicus]	1	11	11	11	5	7	2	4	4	7	3	7	3	5	7	2	4	4	7	3	7	3	5	7	2	4	4	7	3	7	3	20.6	20.6	20.6	93.868	841	841	1	43	0	35.858	10.9	13.8	2.5
NP_001037717.1;XP_006232077.1;XP_006232076.1;XP_006232078.1	NP_001037717.1;XP_006232077.1;XP_006232076.1;XP_006232078.1	4;4;4;3	4;4;4;3	4;4;4;3	NP_001037717.1 NAD kinase 2, mitochondrial [Rattus norvegicus];XP_006232077.1 PREDICTED: NAD kinase 2, mitochondrial isoform X2 [Rattus norvegicus];XP_006232076.1 PREDICTED: NAD kinase 2, mitochondrial isoform X1 [Rattus norvegicus];XP_006232078.1 PREDICTE	4	4	4	4	2	0	0	1	0	1	0	1	1	2	0	0	1	0	1	0	1	1	2	0	0	1	0	1	0	1	1	13.2	13.2	13.2	48.116	425	425;428;450;397	1	6	0	7.0471	6.8	0	0
NP_001037730.1	NP_001037730.1	3	3	3	NP_001037730.1 metalloreductase STEAP4 [Rattus norvegicus]	1	3	3	3	2	0	1	1	0	0	2	0	1	2	0	1	1	0	0	2	0	1	2	0	1	1	0	0	2	0	1	11.3	11.3	11.3	52.764	470	470	1	7	0	24.959	6.4	0	4.9
NP_001037737.1	NP_001037737.1	1	1	1	NP_001037737.1 protein jagunal homolog 1 [Rattus norvegicus]	1	1	1	1	0	0	1	0	1	1	0	1	1	0	0	1	0	1	1	0	1	1	0	0	1	0	1	1	0	1	1	6.6	6.6	6.6	21.102	183	183	1	5	0.00037265	2.5357	0	0	6.6
NP_001037744.1	NP_001037744.1	2	2	2	NP_001037744.1 lipase member H precursor [Rattus norvegicus]	1	2	2	2	1	1	0	0	0	0	0	0	0	1	1	0	0	0	0	0	0	0	1	1	0	0	0	0	0	0	0	6.9	6.9	6.9	50.825	451	451	1	2	0.0027634	1.5219	2	4.9	0
NP_001037748.1	NP_001037748.1	9	9	7	NP_001037748.1 sorting nexin-3 [Rattus norvegicus]	1	9	9	7	5	7	6	6	6	6	6	5	6	5	7	6	6	6	6	6	5	6	4	6	4	5	5	5	4	4	5	59.3	59.3	54.9	18.762	162	162	1	55	0	34.951	43.8	53.1	49.4
NP_001037753.1	NP_001037753.1	3	3	3	NP_001037753.1 protein KTI12 homolog [Rattus norvegicus]	1	3	3	3	3	0	1	0	1	1	1	1	2	3	0	1	0	1	1	1	1	2	3	0	1	0	1	1	1	1	2	14.6	14.6	14.6	38.357	350	350	1	10	0	4.6699	14.6	0	3.4
NP_001037755.2	NP_001037755.2	8	8	8	NP_001037755.2 la-related protein 7 [Rattus norvegicus]	1	8	8	8	2	1	1	2	2	1	4	2	3	2	1	1	2	2	1	4	2	3	2	1	1	2	2	1	4	2	3	15.8	15.8	15.8	64.949	571	571	1	18	0	13.464	5.1	1.8	1.8
NP_001037756.1;XP_006256290.1;XP_017457263.1;XP_006228838.1;NP_001008775.1	NP_001037756.1;XP_006256290.1	5;4;2;2;2	5;4;2;2;2	5;4;2;2;2	NP_001037756.1 splicing factor U2AF 35 kDa subunit [Rattus norvegicus];XP_006256290.1 PREDICTED: splicing factor U2AF 35 kDa subunit isoform X1 [Rattus norvegicus]	5	5	5	5	3	3	3	3	3	3	3	1	2	3	3	3	3	3	3	3	1	2	3	3	3	3	3	3	3	1	2	22.2	22.2	22.2	27.815	239	239;239;166;220;220	1	30	0	79.911	18	13.4	13.4
NP_001040552.2	NP_001040552.2	45	45	45	NP_001040552.2 eukaryotic translation initiation factor 3 subunit A [Rattus norvegicus]	1	45	45	45	23	24	24	25	27	24	26	25	32	23	24	24	25	27	24	26	25	32	23	24	24	25	27	24	26	25	32	36	36	36	163.19	1354	1354	1	322	0	313.67	21.4	22.6	23.9
NP_001040560.1	NP_001040560.1	2	2	2	NP_001040560.1 nucleolar protein 16 [Rattus norvegicus]	1	2	2	2	0	1	1	0	1	0	1	0	0	0	1	1	0	1	0	1	0	0	0	1	1	0	1	0	1	0	0	16.3	16.3	16.3	21.117	178	178	1	5	0	9.8136	0	10.1	10.1
NP_001040564.1;NP_001019927.1	NP_001040564.1;NP_001019927.1	3;2	1;1	1;1	NP_001040564.1 YTH domain-containing family protein 2 [Rattus norvegicus];NP_001019927.1 YTH domain-containing family protein 1 [Rattus norvegicus]	2	3	1	1	0	2	1	1	2	2	2	1	1	0	0	0	0	0	0	1	0	0	0	0	0	0	0	0	1	0	0	5	2.4	2.4	64.01	595	595;559	1	1	0.00054407	2.1539	0	2.7	1.2
NP_001040568.1;XP_006250385.1	NP_001040568.1;XP_006250385.1	3;3	3;3	3;3	NP_001040568.1 cell adhesion molecule 3 precursor [Rattus norvegicus];XP_006250385.1 PREDICTED: cell adhesion molecule 3 isoform X1 [Rattus norvegicus]	2	3	3	3	2	2	0	0	3	2	0	1	2	2	2	0	0	3	2	0	1	2	2	2	0	0	3	2	0	1	2	13.1	13.1	13.1	42.906	396	396;430	1	13	0	39.225	7.6	10.1	0
NP_001040572.1	NP_001040572.1	1	1	1	NP_001040572.1 cell adhesion molecule 4 precursor [Rattus norvegicus]	1	1	1	1	1	0	0	0	0	0	0	0	0	1	0	0	0	0	0	0	0	0	1	0	0	0	0	0	0	0	0	4.6	4.6	4.6	42.781	388	388	1	1	0	12.64	4.6	0	0
NP_001041314.1	NP_001041314.1	1	1	1	NP_001041314.1 glycerol-3-phosphate acyltransferase 6 [Rattus norvegicus]	1	1	1	1	0	1	1	0	1	1	0	0	0	0	1	1	0	1	1	0	0	0	0	1	1	0	1	1	0	0	0	2.6	2.6	2.6	52.123	456	456	1	4	0	8.7604	0	2.6	2.6
NP_001041316.1;XP_017456734.1	NP_001041316.1;XP_017456734.1	8;8	8;8	8;8	NP_001041316.1 N-acetylgalactosamine-6-sulfatase precursor [Rattus norvegicus];XP_017456734.1 PREDICTED: N-acetylgalactosamine-6-sulfatase isoform X1 [Rattus norvegicus]	2	8	8	8	4	3	4	5	5	5	2	4	4	4	3	4	5	5	5	2	4	4	4	3	4	5	5	5	2	4	4	17	17	17	58.302	524	524;567	1	36	0	24.829	11.6	9.2	9.4
NP_001041321.2;XP_017444533.1	NP_001041321.2;XP_017444533.1	4;3	4;3	4;3	NP_001041321.2 swi5-dependent recombination DNA repair protein 1 homolog [Rattus norvegicus];XP_017444533.1 PREDICTED: swi5-dependent recombination DNA repair protein 1 homolog isoform X1 [Rattus norvegicus]	2	4	4	4	2	2	1	1	3	3	3	3	2	2	2	1	1	3	3	3	3	2	2	2	1	1	3	3	3	3	2	22.7	22.7	22.7	29.016	256	256;243	1	21	0	13.61	12.5	9.4	4.7
NP_001041334.1;XP_017449573.1;XP_008762878.1	NP_001041334.1;XP_017449573.1;XP_008762878.1	11;11;11	11;11;11	11;11;11	NP_001041334.1 rho GTPase-activating protein 5 [Rattus norvegicus];XP_017449573.1 PREDICTED: rho GTPase-activating protein 5 isoform X1 [Rattus norvegicus];XP_008762878.1 PREDICTED: rho GTPase-activating protein 5 isoform X1 [Rattus norvegicus]	3	11	11	11	5	0	4	1	1	2	2	1	6	5	0	4	1	1	2	2	1	6	5	0	4	1	1	2	2	1	6	11	11	11	142.76	1245	1245;1503;1503	1	23	0	42.863	5.9	0	4.7
NP_001041336.1	NP_001041336.1	3	3	3	NP_001041336.1 interferon-related developmental regulator 2 [Rattus norvegicus]	1	3	3	3	3	1	1	0	2	0	0	1	1	3	1	1	0	2	0	0	1	1	3	1	1	0	2	0	0	1	1	8.8	8.8	8.8	47.814	441	441	1	9	0	4.1775	8.8	3.9	3.9
NP_001041348.1	NP_001041348.1	5	5	5	NP_001041348.1 39S ribosomal protein L49, mitochondrial [Rattus norvegicus]	1	5	5	5	3	1	3	2	3	2	2	2	3	3	1	3	2	3	2	2	2	3	3	1	3	2	3	2	2	2	3	41	41	41	19.406	166	166	1	21	0	44.949	22.3	8.4	22.3
NP_001041356.1	NP_001041356.1	7	6	5	NP_001041356.1 uncharacterized protein LOC315963 [Rattus norvegicus]	1	7	6	5	3	2	1	6	2	1	4	1	2	2	2	1	5	1	0	3	1	2	1	2	1	4	0	0	2	0	1	18.8	17.1	14.7	50.974	462	462	1	19	0	20.43	6.1	6.9	3
NP_001041359.1;NP_001102846.1;XP_008768097.1	NP_001041359.1;NP_001102846.1;XP_008768097.1	1;1;1	1;1;1	1;1;1	NP_001041359.1 uncharacterized protein LOC317456 [Rattus norvegicus];NP_001102846.1 acyl-CoA:lysophosphatidylglycerol acyltransferase 1 [Rattus norvegicus];XP_008768097.1 PREDICTED: acyl-CoA:lysophosphatidylglycerol acyltransferase 1 isoform X1 [Rattus nor	3	1	1	1	1	1	0	0	1	0	0	1	1	1	1	0	0	1	0	0	1	1	1	1	0	0	1	0	0	1	1	7.8	7.8	7.8	31.357	268	268;370;407	1	5	0.00019861	3.4208	7.8	7.8	0
NP_001041367.1	NP_001041367.1	3	3	3	NP_001041367.1 zinc finger CCCH domain-containing protein 11A [Rattus norvegicus]	1	3	3	3	0	0	0	1	2	2	0	2	2	0	0	0	1	2	2	0	2	2	0	0	0	1	2	2	0	2	2	4.7	4.7	4.7	87.012	793	793	1	9	0	4.1646	0	0	0
NP_001041371.2	NP_001041371.2	8	8	8	NP_001041371.2 mitotic checkpoint protein BUB3 [Rattus norvegicus]	1	8	8	8	6	2	5	4	3	5	3	4	3	6	2	5	4	3	5	3	4	3	6	2	5	4	3	5	3	4	3	29.1	29.1	29.1	36.954	326	326	1	37	0	138.91	24.5	7.4	20.6
NP_001041372.1	NP_001041372.1	7	6	6	NP_001041372.1 serine/arginine-rich splicing factor 3 [Rattus norvegicus]	1	7	6	6	5	4	5	5	4	5	5	5	5	4	3	4	4	3	4	4	4	4	4	3	4	4	3	4	4	4	4	34.8	34.8	34.8	19.329	164	164	1	48	0	112.6	34.8	28.7	34.8
NP_001041374.1	NP_001041374.1	1	1	1	NP_001041374.1 28S ribosomal protein S28, mitochondrial [Rattus norvegicus]	1	1	1	1	1	0	0	0	0	0	0	0	0	1	0	0	0	0	0	0	0	0	1	0	0	0	0	0	0	0	0	6.8	6.8	6.8	25.766	235	235	1	1	0.00019573	3.1737	6.8	0	0
NP_001041406.1;XP_008758961.1	NP_001041406.1;XP_008758961.1	1;1	1;1	1;1	NP_001041406.1 uncharacterized protein LOC499530 [Rattus norvegicus];XP_008758961.1 PREDICTED: uncharacterized protein LOC499530 isoform X1 [Rattus norvegicus]	2	1	1	1	0	0	0	0	1	1	0	0	0	0	0	0	0	1	1	0	0	0	0	0	0	0	1	1	0	0	0	7.2	7.2	7.2	15.542	139	139;140	1	2	0.0099641	0.89264	0	0	0
NP_001041540.1;XP_008761555.1;XP_017458360.1;XP_017448540.1;XP_017448539.1;XP_008774072.1;XP_017448197.1;XP_008761531.1;XP_006237515.1;NP_569086.1;NP_001078873.1;NP_001078871.1;XP_017458359.1;XP_017448538.1	NP_001041540.1	6;1;1;1;1;1;1;1;1;1;1;1;1;1	6;1;1;1;1;1;1;1;1;1;1;1;1;1	6;1;1;1;1;1;1;1;1;1;1;1;1;1	NP_001041540.1 C-type lectin domain family 2 member D11 [Rattus norvegicus]	14	6	6	6	3	3	4	2	4	3	3	5	3	3	3	4	2	4	3	3	5	3	3	3	4	2	4	3	3	5	3	30.9	30.9	30.9	23.537	207	207;177;207;207;216;216;233;233;233;233;233;233;237;237	1	33	0	36.95	21.3	15	20.8
NP_001041645.1;XP_006230417.1;XP_006230416.1;XP_006230415.1;NP_604451.2;XP_006230414.1;XP_006230413.1	NP_001041645.1;XP_006230417.1;XP_006230416.1;XP_006230415.1;NP_604451.2;XP_006230414.1;XP_006230413.1	1;1;1;1;1;1;1	1;1;1;1;1;1;1	1;1;1;1;1;1;1	NP_001041645.1 SH2B adapter protein 1 isoform 2 [Rattus norvegicus];XP_006230417.1 PREDICTED: SH2B adapter protein 1 isoform X4 [Rattus norvegicus];XP_006230416.1 PREDICTED: SH2B adapter protein 1 isoform X3 [Rattus norvegicus];XP_006230415.1 PREDICTED: SH	7	1	1	1	0	0	0	1	0	0	1	0	0	0	0	0	1	0	0	1	0	0	0	0	0	1	0	0	1	0	0	3.1	3.1	3.1	70.862	670	670;716;756;756;756;758;790	1	2	0.00037175	2.5119	0	0	0
NP_001041649.1;NP_001100111.1	NP_001041649.1;NP_001100111.1	8;4	8;4	8;4	NP_001041649.1 ras-related GTP-binding protein C [Rattus norvegicus];NP_001100111.1 ras-related GTP-binding protein D [Rattus norvegicus]	2	8	8	8	4	4	1	7	3	3	5	4	3	4	4	1	7	3	3	5	4	3	4	4	1	7	3	3	5	4	3	26.1	26.1	26.1	44.106	398	398;399	1	41	0	25.454	12.3	14.1	3.5
NP_001065244.1	NP_001065244.1	5	5	5	NP_001065244.1 bolA-like protein 1 [Rattus norvegicus]	1	5	5	5	1	3	1	1	2	1	3	2	2	1	3	1	1	2	1	3	2	2	1	3	1	1	2	1	3	2	2	41.6	41.6	41.6	14.403	137	137	1	17	0	10.661	9.5	17.5	10.9
NP_001070998.1	NP_001070998.1	14	14	14	NP_001070998.1 28S ribosomal protein S22, mitochondrial [Rattus norvegicus]	1	14	14	14	5	4	4	4	8	4	7	5	5	5	4	4	4	8	4	7	5	5	5	4	4	4	8	4	7	5	5	44.8	44.8	44.8	41.235	359	359	1	48	0	63.24	21.2	12.8	12.3
NP_001071053.1;XP_017450601.1	NP_001071053.1;XP_017450601.1	7;7	7;7	7;7	NP_001071053.1 protein canopy homolog 2 precursor [Rattus norvegicus];XP_017450601.1 PREDICTED: protein canopy homolog 2 isoform X1 [Rattus norvegicus]	2	7	7	7	2	3	3	6	5	5	6	3	6	2	3	3	6	5	5	6	3	6	2	3	3	6	5	5	6	3	6	40.7	40.7	40.7	20.709	182	182;186	1	61	0	33.094	15.4	20.9	20.9
NP_001071058.1	NP_001071058.1	1	1	1	NP_001071058.1 blood vessel epicardial substance [Rattus norvegicus]	1	1	1	1	0	1	0	0	0	0	0	0	0	0	1	0	0	0	0	0	0	0	0	1	0	0	0	0	0	0	0	3.4	3.4	3.4	40.86	356	356	1	1	0.0064968	1.1111	0	3.4	0
NP_001071103.1;XP_006254408.1;XP_006254414.1;XP_006254407.1;XP_006254406.1;XP_017456068.1;XP_017456067.1;XP_006254405.1;XP_006254413.1;XP_017456066.1;XP_017456065.1;XP_017456064.1;XP_017456071.1;XP_017456072.1;XP_017456070.1;XP_006254432.1;XP_006237779.1;XP_006225225.1;XP_017456069.1	NP_001071103.1;XP_006254408.1;XP_006254414.1;XP_006254407.1;XP_006254406.1;XP_017456068.1;XP_017456067.1;XP_006254405.1;XP_006254413.1;XP_017456066.1;XP_017456065.1;XP_017456064.1;XP_017456071.1;XP_017456072.1;XP_017456070.1;XP_006254432.1;XP_006237779.1;XP_006225225.1;XP_017456069.1	5;5;5;5;5;5;5;5;5;5;5;5;5;4;4;4;4;4;4	5;5;5;5;5;5;5;5;5;5;5;5;5;4;4;4;4;4;4	5;5;5;5;5;5;5;5;5;5;5;5;5;4;4;4;4;4;4	NP_001071103.1 acyl-CoA-binding domain-containing protein 5 [Rattus norvegicus];XP_006254408.1 PREDICTED: acyl-CoA-binding domain-containing protein 5 isoform X10 [Rattus norvegicus];XP_006254414.1 PREDICTED: acyl-CoA-binding domain-containing protein 5 is	19	5	5	5	1	1	1	1	2	2	1	2	3	1	1	1	1	2	2	1	2	3	1	1	1	1	2	2	1	2	3	13	13	13	52.488	471	471;503;504;506;507;510;516;517;518;520;527;530;531;452;467;471;471;471;496	1	14	0	15.961	3.2	2.5	3.2
NP_001071110.1	NP_001071110.1	3	3	3	NP_001071110.1 complement factor D precursor [Rattus norvegicus]	1	3	3	3	2	3	3	1	1	3	1	2	1	2	3	3	1	1	3	1	2	1	2	3	3	1	1	3	1	2	1	23.6	23.6	23.6	28.442	263	263	1	18	0	19.769	16	23.6	23.6
NP_001071127.1	NP_001071127.1	5	5	5	NP_001071127.1 28S ribosomal protein S24, mitochondrial [Rattus norvegicus]	1	5	5	5	1	1	1	1	2	3	1	3	3	1	1	1	1	2	3	1	3	3	1	1	1	1	2	3	1	3	3	33.5	33.5	33.5	18.742	167	167	1	21	0	9.4353	11.4	4.8	12
NP_001071136.1;XP_006230803.1	NP_001071136.1;XP_006230803.1	4;4	4;4	4;4	NP_001071136.1 dr1-associated corepressor [Rattus norvegicus];XP_006230803.1 PREDICTED: dr1-associated corepressor isoform X1 [Rattus norvegicus]	2	4	4	4	2	2	1	0	1	1	1	1	1	2	2	1	0	1	1	1	1	1	2	2	1	0	1	1	1	1	1	23.4	23.4	23.4	22.326	205	205;212	1	10	0	8.0336	17.6	18	5.4
NP_001071137.1;XP_008763786.1;XP_008763785.1	NP_001071137.1;XP_008763786.1;XP_008763785.1	2;2;2	2;2;2	2;2;2	NP_001071137.1 zinc transporter ZIP4 precursor [Rattus norvegicus];XP_008763786.1 PREDICTED: zinc transporter ZIP4 isoform X1 [Rattus norvegicus];XP_008763785.1 PREDICTED: zinc transporter ZIP4 isoform X1 [Rattus norvegicus]	3	2	2	2	0	0	0	0	0	0	1	1	0	0	0	0	0	0	0	1	1	0	0	0	0	0	0	0	1	1	0	4.6	4.6	4.6	71.121	656	656;657;657	1	2	0	18.58	0	0	0
NP_001071138.1	NP_001071138.1	11	11	11	NP_001071138.1 eukaryotic translation initiation factor 3 subunit J [Rattus norvegicus]	1	11	11	11	9	5	6	5	4	3	6	4	4	9	5	6	5	4	3	6	4	4	9	5	6	5	4	3	6	4	4	47.5	47.5	47.5	29.187	259	259	1	55	0	178.64	47.5	28.2	37.8
NP_001071140.1	NP_001071140.1	6	6	6	NP_001071140.1 cleavage stimulation factor subunit 3 [Rattus norvegicus]	1	6	6	6	2	3	2	2	3	2	4	2	1	2	3	2	2	3	2	4	2	1	2	3	2	2	3	2	4	2	1	12	12	12	69.265	590	590	1	21	0	28.44	4.9	5.4	4.9
NP_001073173.2;NP_001290466.1	NP_001073173.2;NP_001290466.1	8;7	8;7	8;7	NP_001073173.2 shootin-1 isoform 1 [Rattus norvegicus];NP_001290466.1 shootin-1 isoform 2 [Rattus norvegicus]	2	8	8	8	1	2	3	1	2	1	2	3	3	1	2	3	1	2	1	2	3	3	1	2	3	1	2	1	2	3	3	13.6	13.6	13.6	71.445	633	633;456	1	21	0	46.85	1.4	3	5.2
NP_001073234.1	NP_001073234.1	17	17	17	NP_001073234.1 pre-mRNA-processing factor 6 [Rattus norvegicus]	1	17	17	17	6	4	3	6	4	6	8	9	8	6	4	3	6	4	6	8	9	8	6	4	3	6	4	6	8	9	8	23.5	23.5	23.5	106.76	941	941	1	58	0	102.09	9.2	5.4	3.9
NP_001073356.1;XP_006237412.1;XP_006237411.1	NP_001073356.1;XP_006237412.1;XP_006237411.1	1;1;1	1;1;1	1;1;1	NP_001073356.1 inhibitor of growth protein 4 [Rattus norvegicus];XP_006237412.1 PREDICTED: inhibitor of growth protein 4 isoform X2 [Rattus norvegicus];XP_006237411.1 PREDICTED: inhibitor of growth protein 4 isoform X1 [Rattus norvegicus]	3	1	1	1	1	0	0	0	0	0	0	0	0	1	0	0	0	0	0	0	0	0	1	0	0	0	0	0	0	0	0	9	9	9	28.087	245	245;248;249	1	1	0.003406	1.3686	9	0	0
NP_001073358.2	NP_001073358.2	4	4	4	NP_001073358.2 selenide, water dikinase 2 [Rattus norvegicus]	1	4	4	4	2	3	2	1	1	1	1	1	1	2	3	2	1	1	1	1	1	1	2	3	2	1	1	1	1	1	1	16.4	16.4	16.4	47.792	451	451	1	16	0	10.512	4.9	11.8	8
NP_001073359.1	NP_001073359.1	2	2	2	NP_001073359.1 retinoic acid-induced protein 3 [Rattus norvegicus]	1	2	2	2	0	1	1	1	1	1	0	1	1	0	1	1	1	1	1	0	1	1	0	1	1	1	1	1	0	1	1	7.5	7.5	7.5	40.451	358	358	1	8	0	5.2061	0	3.6	3.6
NP_001073366.1	NP_001073366.1	1	1	1	NP_001073366.1 HEAT repeat-containing protein 6 [Rattus norvegicus]	1	1	1	1	0	0	0	0	1	0	0	0	0	0	0	0	0	1	0	0	0	0	0	0	0	0	1	0	0	0	0	1	1	1	136.5	1252	1252	1	1	0.0014035	1.7017	0	0	0
NP_001073367.2	NP_001073367.2	2	2	2	NP_001073367.2 neutrophil antibiotic peptide NP-3 precursor [Rattus norvegicus]	1	2	2	2	0	0	0	0	1	1	0	0	0	0	0	0	0	1	1	0	0	0	0	0	0	0	1	1	0	0	0	31	31	31	9.3527	87	87	1	2	0.00037355	2.5486	0	0	0
NP_001073408.1	NP_001073408.1	5	5	5	NP_001073408.1 lipase maturation factor 2 [Rattus norvegicus]	1	5	5	5	0	0	2	0	1	2	0	0	1	0	0	2	0	1	2	0	0	1	0	0	2	0	1	2	0	0	1	11.1	11.1	11.1	80.253	702	702	1	6	0	13.22	0	0	3.8
NP_001073616.1;XP_006249425.1	NP_001073616.1;XP_006249425.1	6;6	6;6	6;6	NP_001073616.1 anaphase-promoting complex subunit 5 [Rattus norvegicus];XP_006249425.1 PREDICTED: anaphase-promoting complex subunit 5 isoform X1 [Rattus norvegicus]	2	6	6	6	2	2	2	2	3	2	3	1	2	2	2	2	2	3	2	3	1	2	2	2	2	2	3	2	3	1	2	12.9	12.9	12.9	81.738	727	727;740	1	19	0	23.39	5	5	5
NP_001073849.1	NP_001073849.1	5	5	4	NP_001073849.1 cell cycle control protein 50B [Rattus norvegicus]	1	5	5	4	0	3	2	1	2	3	1	3	2	0	3	2	1	2	3	1	3	2	0	2	1	1	1	2	1	2	1	17	17	14.7	39.27	353	353	1	17	0	25.437	0	9.6	5.7
NP_001075427.1	NP_001075427.1	2	2	2	NP_001075427.1 guanine nucleotide-binding protein-like 3-like protein [Rattus norvegicus]	1	2	2	2	0	0	0	0	0	0	0	1	1	0	0	0	0	0	0	0	1	1	0	0	0	0	0	0	0	1	1	5.4	5.4	5.4	65.266	577	577	1	2	0.0033967	1.3459	0	0	0
NP_001075878.1	NP_001075878.1	1	1	1	NP_001075878.1 Fbxw17 protein [Rattus norvegicus]	1	1	1	1	0	0	0	1	0	0	0	0	0	0	0	0	1	0	0	0	0	0	0	0	0	1	0	0	0	0	0	4.1	4.1	4.1	52.121	466	466	1	1	0.00018904	2.6873	0	0	0
NP_001076010.1;NP_001076009.1;NP_001076008.1;NP_077380.2;XP_229073.1;XP_001066404.1	NP_001076010.1;NP_001076009.1;NP_001076008.1;NP_077380.2	10;10;10;10;1;1	10;10;10;10;1;1	9;9;9;9;0;0	NP_001076010.1 heterogeneous nuclear ribonucleoprotein D0 isoform d [Rattus norvegicus];NP_001076009.1 heterogeneous nuclear ribonucleoprotein D0 isoform c [Rattus norvegicus];NP_001076008.1 heterogeneous nuclear ribonucleoprotein D0 isoform b [Rattus norv	6	10	10	9	9	7	7	6	7	8	6	7	9	9	7	7	6	7	8	6	7	9	8	6	6	5	6	7	5	6	8	31.9	31.9	29.1	30.496	285	285;304;334;353;565;565	1	98	0	150.79	27.7	22.5	22.5
NP_001076782.1	NP_001076782.1	6	6	6	NP_001076782.1 charged multivesicular body protein 1a [Rattus norvegicus]	1	6	6	6	2	1	1	2	1	2	2	5	3	2	1	1	2	1	2	2	5	3	2	1	1	2	1	2	2	5	3	21.9	21.9	21.9	21.607	196	196	1	19	0	4.2673	8.7	4.6	4.6
NP_001077093.1;XP_008768376.1;XP_008768375.1	NP_001077093.1;XP_008768376.1;XP_008768375.1	20;19;19	20;19;19	18;17;17	NP_001077093.1 sister chromatid cohesion protein PDS5 homolog A [Rattus norvegicus];XP_008768376.1 PREDICTED: sister chromatid cohesion protein PDS5 homolog A isoform X2 [Rattus norvegicus];XP_008768375.1 PREDICTED: sister chromatid cohesion protein PDS5 h	3	20	20	18	7	6	6	5	6	6	3	10	8	7	6	6	5	6	6	3	10	8	6	6	6	5	4	5	3	8	8	18.2	18.2	17.1	150.28	1333	1333;1305;1334	1	61	0	83.969	6.7	7.5	7.4
NP_001078821.1	NP_001078821.1	1	1	1	NP_001078821.1 apolipoprotein C-II precursor [Rattus norvegicus]	1	1	1	1	1	1	1	0	0	0	0	0	0	1	1	1	0	0	0	0	0	0	1	1	1	0	0	0	0	0	0	21.6	21.6	21.6	10.695	97	97	1	6	0	4.5385	21.6	21.6	21.6
NP_001078838.1;XP_006238694.1;NP_608302.2;NP_001292358.1;XP_017448630.1;XP_006238695.1	NP_001078838.1;XP_006238694.1;NP_608302.2;NP_001292358.1;XP_017448630.1;XP_006238695.1	2;2;1;1;1;1	2;2;1;1;1;1	2;2;1;1;1;1	NP_001078838.1 kinesin-like protein KIF2C isoform 1 [Rattus norvegicus];XP_006238694.1 PREDICTED: kinesin-like protein KIF2C isoform X1 [Rattus norvegicus];NP_608302.2 kinesin-like protein KIF2C isoform 2 [Rattus norvegicus];NP_001292358.1 kinesin-like pro	6	2	2	2	1	0	0	0	0	0	1	0	0	1	0	0	0	0	0	1	0	0	1	0	0	0	0	0	1	0	0	4.6	4.6	4.6	80.994	721	721;722;670;671;674;674	1	2	0	3.8771	3.2	0	0
NP_001078954.1	NP_001078954.1	7	7	7	NP_001078954.1 selenoprotein O [Rattus norvegicus]	1	7	7	7	2	2	3	3	1	3	1	3	4	2	2	3	3	1	3	1	3	4	2	2	3	3	1	3	1	3	4	14.7	14.7	14.7	74.384	666	666	1	22	0	73.437	5.4	3.3	8
NP_001091686.1	NP_001091686.1	1	1	1	NP_001091686.1 transcriptional enhancer factor TEF-5 [Rattus norvegicus]	1	1	1	1	1	0	0	0	0	0	0	0	0	1	0	0	0	0	0	0	0	0	1	0	0	0	0	0	0	0	0	5.5	5.5	5.5	48.862	437	437	1	1	0.00019467	3.1044	5.5	0	0
NP_001093117.1	NP_001093117.1	2	2	2	NP_001093117.1 costars family protein ABRACL [Rattus norvegicus]	1	2	2	2	2	2	2	2	2	2	2	2	2	2	2	2	2	2	2	2	2	2	2	2	2	2	2	2	2	2	2	30.9	30.9	30.9	9.0303	81	81	1	27	0	97.227	30.9	30.9	30.9
NP_001093606.2	NP_001093606.2	5	5	5	NP_001093606.2 mitochondrial import inner membrane translocase subunit TIM16 [Rattus norvegicus]	1	5	5	5	1	3	3	2	1	1	3	2	2	1	3	3	2	1	1	3	2	2	1	3	3	2	1	1	3	2	2	52.8	52.8	52.8	13.771	125	125	1	19	0	85.015	21.6	40.8	40.8
NP_001093628.1	NP_001093628.1	22	19	19	NP_001093628.1 eukaryotic initiation factor 4A-III [Rattus norvegicus]	1	22	19	19	13	13	11	12	15	14	12	15	15	12	12	10	10	14	13	9	13	12	12	12	10	10	14	13	9	13	12	60.6	54.7	54.7	46.84	411	411	1	166	0	184.26	48.4	44.5	43.6
NP_001093941.1	NP_001093941.1	6	6	6	NP_001093941.1 28S ribosomal protein S7, mitochondrial [Rattus norvegicus]	1	6	6	6	2	1	1	2	3	4	4	3	3	2	1	1	2	3	4	4	3	3	2	1	1	2	3	4	4	3	3	31.8	31.8	31.8	28.197	242	242	1	26	0	32.904	12.4	4.5	5
NP_001093969.1	NP_001093969.1	20	20	20	NP_001093969.1 plakophilin-2 [Rattus norvegicus]	1	20	20	20	10	10	9	16	12	8	9	9	8	10	10	9	16	12	8	9	9	8	10	10	9	16	12	8	9	9	8	32.6	32.6	32.6	87.826	795	795	1	114	0	323.31	20.1	19.2	17.9
NP_001093971.1;XP_006248077.1	NP_001093971.1;XP_006248077.1	3;3	3;3	3;3	NP_001093971.1 ubiquitin carboxyl-terminal hydrolase 16 [Rattus norvegicus];XP_006248077.1 PREDICTED: ubiquitin carboxyl-terminal hydrolase 16 isoform X1 [Rattus norvegicus]	2	3	3	3	1	0	1	1	0	0	1	1	0	1	0	1	1	0	0	1	1	0	1	0	1	1	0	0	1	1	0	5.5	5.5	5.5	93.69	825	825;826	1	5	0.00055659	2.4812	2.9	0	2.9
NP_001093972.1	NP_001093972.1	13	13	13	NP_001093972.1 1,4-alpha-glucan-branching enzyme [Rattus norvegicus]	1	13	13	13	4	6	7	6	6	4	5	7	7	4	6	7	6	6	4	5	7	7	4	6	7	6	6	4	5	7	7	22.4	22.4	22.4	80.418	702	702	1	59	0	50.268	7	11.1	12.7
NP_001093974.1	NP_001093974.1	6	6	6	NP_001093974.1 growth arrest and DNA damage-inducible proteins-interacting protein 1 [Rattus norvegicus]	1	6	6	6	4	4	2	2	2	1	2	2	2	4	4	2	2	2	1	2	2	2	4	4	2	2	2	1	2	2	2	39.5	39.5	39.5	26.467	228	228	1	24	0	84.387	28.9	28.1	17.5
NP_001093979.1	NP_001093979.1	16	16	16	NP_001093979.1 26S protease regulatory subunit 10B [Rattus norvegicus]	1	16	16	16	11	8	9	11	11	10	11	11	11	11	8	9	11	11	10	11	11	11	11	8	9	11	11	10	11	11	11	48.4	48.4	48.4	45.796	403	403	1	155	0	226	37	23.3	31
NP_001093980.1	NP_001093980.1	12	12	12	NP_001093980.1 probable tRNA N6-adenosine threonylcarbamoyltransferase [Rattus norvegicus]	1	12	12	12	5	5	4	6	5	6	6	5	7	5	5	4	6	5	6	6	5	7	5	5	4	6	5	6	6	5	7	47.5	47.5	47.5	36.356	335	335	1	53	0	83.882	20.9	26.9	21.8
NP_001093988.1;XP_008759717.1	NP_001093988.1;XP_008759717.1	1;1	1;1	1;1	NP_001093988.1 heparan sulfate 2-O-sulfotransferase 1 [Rattus norvegicus];XP_008759717.1 PREDICTED: heparan sulfate 2-O-sulfotransferase 1 isoform X1 [Rattus norvegicus]	2	1	1	1	1	0	1	0	0	0	0	1	0	1	0	1	0	0	0	0	1	0	1	0	1	0	0	0	0	1	0	2.8	2.8	2.8	41.851	356	356;357	1	3	0.00071301	1.9116	2.8	0	2.8
NP_001093990.1	NP_001093990.1	11	11	10	NP_001093990.1 synembryn-A [Rattus norvegicus]	1	11	11	10	3	2	2	3	3	3	3	4	5	3	2	2	3	3	3	3	4	5	3	2	2	3	3	2	2	3	4	26.8	26.8	24.2	59.826	530	530	1	30	0	29.468	6.8	4.3	4.7
NP_001093999.1	NP_001093999.1	4	4	4	NP_001093999.1 thioredoxin-related transmembrane protein 4 precursor [Rattus norvegicus]	1	4	4	4	1	1	3	3	0	0	3	1	3	1	1	3	3	0	0	3	1	3	1	1	3	3	0	0	3	1	3	15.8	15.8	15.8	37.54	336	336	1	15	0	9.9429	3.9	3.9	11.9
NP_001094002.1	NP_001094002.1	5	5	5	NP_001094002.1 anaphase-promoting complex subunit 2 [Rattus norvegicus]	1	5	5	5	1	0	1	1	0	0	1	0	2	1	0	1	1	0	0	1	0	2	1	0	1	1	0	0	1	0	2	8.1	8.1	8.1	95.372	836	836	1	6	0	4.9217	2.8	0	1.6
NP_001094004.1;NP_001041385.1	NP_001094004.1	21;2	21;2	21;2	NP_001094004.1 60S ribosomal protein L7 [Rattus norvegicus]	2	21	21	21	8	9	7	12	14	16	12	15	13	8	9	7	12	14	16	12	15	13	8	9	7	12	14	16	12	15	13	50.4	50.4	50.4	30.313	260	260;136	1	164	0	111.86	31.9	35.8	28.1
NP_001094006.1;XP_006238572.1;XP_008761646.1;XP_008761645.1	NP_001094006.1;XP_006238572.1;XP_008761646.1;XP_008761645.1	7;7;4;4	7;7;4;4	1;1;0;0	NP_001094006.1 protein mago nashi homolog [Rattus norvegicus];XP_006238572.1 PREDICTED: protein mago nashi homolog isoform X1 [Rattus norvegicus];XP_008761646.1 PREDICTED: protein mago nashi homolog 2 isoform X1 [Rattus norvegicus];XP_008761645.1 PREDICTED	4	7	7	1	3	4	1	4	4	4	4	3	4	3	4	1	4	4	4	4	3	4	0	1	0	1	1	1	1	1	1	47.9	47.9	5.5	17.163	146	146;161;102;102	1	40	0	59.955	31.5	30.8	13.7
NP_001094009.1	NP_001094009.1	10	10	10	NP_001094009.1 succinate dehydrogenase [ubiquinone] iron-sulfur subunit, mitochondrial precursor [Rattus norvegicus]	1	10	10	10	9	6	6	8	8	6	6	6	6	9	6	6	8	8	6	6	6	6	9	6	6	8	8	6	6	6	6	35.8	35.8	35.8	31.83	282	282	1	81	0	35.032	33.3	24.1	24.1
NP_001094010.1	NP_001094010.1	7	7	7	NP_001094010.1 isoamyl acetate-hydrolyzing esterase 1 homolog [Rattus norvegicus]	1	7	7	7	6	5	5	3	5	3	4	6	5	6	5	5	3	5	3	4	6	5	6	5	5	3	5	3	4	6	5	32.9	32.9	32.9	28.004	249	249	1	59	0	97.765	32.5	29.3	29.3
NP_001094012.1	NP_001094012.1	14	14	3	NP_001094012.1 eukaryotic translation initiation factor 2 subunit 3, X-linked [Rattus norvegicus]	1	14	14	3	9	10	10	8	10	8	8	8	9	9	10	10	8	10	8	8	8	9	2	2	2	2	3	1	1	1	1	38.8	38.8	4.9	51.079	472	472	1	120	0	309.09	29.7	33.1	32.8
NP_001094019.1	NP_001094019.1	4	4	4	NP_001094019.1 28S ribosomal protein S9, mitochondrial [Rattus norvegicus]	1	4	4	4	2	3	2	1	2	2	3	3	3	2	3	2	1	2	2	3	3	3	2	3	2	1	2	2	3	3	3	13.6	13.6	13.6	45.01	390	390	1	23	0	35.291	5.9	11	5.9
NP_001094021.1;XP_006246548.1	NP_001094021.1;XP_006246548.1	2;1	2;1	2;1	NP_001094021.1 multiple myeloma tumor-associated protein 2 homolog [Rattus norvegicus];XP_006246548.1 PREDICTED: multiple myeloma tumor-associated protein 2 homolog isoform X1 [Rattus norvegicus]	2	2	2	2	0	0	0	0	0	0	0	1	1	0	0	0	0	0	0	0	1	1	0	0	0	0	0	0	0	1	1	9.2	9.2	9.2	29.299	260	260;274	1	2	0.0024378	1.6039	0	0	0
NP_001094047.1	NP_001094047.1	5	5	5	NP_001094047.1 amyloid beta A4 precursor protein-binding family B member 1-interacting protein [Rattus norvegicus]	1	5	5	5	1	1	0	0	1	0	2	1	1	1	1	0	0	1	0	2	1	1	1	1	0	0	1	0	2	1	1	9.9	9.9	9.9	73.675	664	664	1	7	0	6.0363	1.5	2.7	0
NP_001094049.1	NP_001094049.1	19	19	19	NP_001094049.1 SUMO-activating enzyme subunit 2 [Rattus norvegicus]	1	19	19	19	8	6	8	8	11	12	5	12	15	8	6	8	8	11	12	5	12	15	8	6	8	8	11	12	5	12	15	35.4	35.4	35.4	70.769	639	639	1	99	0	163.74	25.7	23.8	26.1
NP_001094052.1;XP_017444690.1;XP_017444689.1;XP_017444688.1;XP_008757956.1;XP_008757955.1;XP_006230017.1;XP_008757958.1;XP_006230015.1;XP_017444691.1;XP_008757957.1	NP_001094052.1;XP_017444690.1;XP_017444689.1;XP_017444688.1;XP_008757956.1;XP_008757955.1;XP_006230017.1;XP_008757958.1;XP_006230015.1;XP_017444691.1;XP_008757957.1	5;5;5;5;5;5;4;4;4;4;4	4;4;4;4;4;4;3;3;3;3;3	4;4;4;4;4;4;3;3;3;3;3	NP_001094052.1 liprin-beta-2 [Rattus norvegicus];XP_017444690.1 PREDICTED: liprin-beta-2 isoform X3 [Rattus norvegicus];XP_017444689.1 PREDICTED: liprin-beta-2 isoform X2 [Rattus norvegicus];XP_017444688.1 PREDICTED: liprin-beta-2 isoform X1 [Rattus norveg	11	5	4	4	0	2	2	0	1	1	0	1	0	0	2	1	0	1	1	0	1	0	0	2	1	0	1	1	0	1	0	7.4	6.1	6.1	98.312	876	876;887;937;948;948;948;726;771;810;868;871	1	6	0	7.483	0	3.2	3.4
NP_001094100.2;XP_008766294.1	NP_001094100.2;XP_008766294.1	5;4	5;4	5;4	NP_001094100.2 integrator complex subunit 2 [Rattus norvegicus];XP_008766294.1 PREDICTED: integrator complex subunit 2 isoform X1 [Rattus norvegicus]	2	5	5	5	2	0	1	1	0	0	1	0	1	2	0	1	1	0	0	1	0	1	2	0	1	1	0	0	1	0	1	6.7	6.7	6.7	133.54	1198	1198;1199	1	6	0	7.3762	3.8	0	1.4
NP_001094106.1	NP_001094106.1	7	7	7	NP_001094106.1 secretory carrier-associated membrane protein 1 [Rattus norvegicus]	1	7	7	7	1	4	3	3	1	3	2	2	3	1	4	3	3	1	3	2	2	3	1	4	3	3	1	3	2	2	3	34.6	34.6	34.6	37.998	338	338	1	30	0	92.878	7.7	23.1	19.2
NP_001094117.1	NP_001094117.1	9	7	7	NP_001094117.1 fragile X mental retardation syndrome-related protein 2 [Rattus norvegicus]	1	9	7	7	2	4	3	4	3	1	3	3	3	0	3	2	2	1	1	2	1	2	0	3	2	2	1	1	2	1	2	14.4	12	12	74.374	675	675	1	17	0	8.2086	2.4	5.5	6.4
NP_001094122.1	NP_001094122.1	5	5	5	NP_001094122.1 protein O-glucosyltransferase 1 precursor [Rattus norvegicus]	1	5	5	5	2	1	1	2	3	2	1	1	2	2	1	1	2	3	2	1	1	2	2	1	1	2	3	2	1	1	2	14	14	14	46.509	392	392	1	21	0	22.566	5.6	3.6	3.6
NP_001094128.2;XP_003749550.1	NP_001094128.2	34;5	33;5	33;5	NP_001094128.2 stress-70 protein, mitochondrial [Rattus norvegicus]	2	34	33	33	23	22	23	26	25	26	25	26	23	23	21	22	26	25	26	24	25	23	23	21	22	26	25	26	24	25	23	48	48	48	73.744	679	679;119	1	367	0	323.31	41.4	38.4	37.8
NP_001094131.1	NP_001094131.1	5	5	5	NP_001094131.1 RNA polymerase-associated protein CTR9 homolog [Rattus norvegicus]	1	5	5	5	1	0	1	1	4	0	3	1	1	1	0	1	1	4	0	3	1	1	1	0	1	1	4	0	3	1	1	7.7	7.7	7.7	133.34	1173	1173	1	13	0	6.1058	1.3	0	1.9
NP_001094144.1;XP_017453131.1	NP_001094144.1;XP_017453131.1	5;5	5;5	5;5	NP_001094144.1 dual specificity mitogen-activated protein kinase kinase 3 [Rattus norvegicus];XP_017453131.1 PREDICTED: dual specificity mitogen-activated protein kinase kinase 3-like [Rattus norvegicus]	2	5	5	5	3	2	2	3	2	4	1	1	2	3	2	2	3	2	4	1	1	2	3	2	2	3	2	4	1	1	2	19	19	19	39.31	347	347;419	1	29	0	12.096	13	8.9	8.9
NP_001094151.1;NP_001128334.1;NP_001002828.1	NP_001094151.1;NP_001128334.1;NP_001002828.1	2;2;1	2;2;1	2;2;1	NP_001094151.1 pre-B-cell leukemia transcription factor 1 isoform b [Rattus norvegicus];NP_001128334.1 pre-B-cell leukemia transcription factor 1 isoform a [Rattus norvegicus];NP_001002828.1 pre-B-cell leukemia transcription factor 2 [Rattus norvegicus]	3	2	2	2	1	0	2	1	0	1	1	0	0	1	0	2	1	0	1	1	0	0	1	0	2	1	0	1	1	0	0	11.5	11.5	11.5	38.427	347	347;430;430	1	6	0	25.238	7.2	0	11.5
NP_001094155.1;XP_017455210.1	NP_001094155.1;XP_017455210.1	8;8	8;8	8;8	NP_001094155.1 citramalyl-CoA lyase, mitochondrial precursor [Rattus norvegicus];XP_017455210.1 PREDICTED: citrate lyase subunit beta-like protein, mitochondrial isoform X1 [Rattus norvegicus]	2	8	8	8	6	2	3	2	1	3	2	3	2	6	2	3	2	1	3	2	3	2	6	2	3	2	1	3	2	3	2	37	37	37	37.321	338	338;344	1	24	0	59.584	27.5	7.1	11.8
NP_001094161.1	NP_001094161.1	68	1	1	NP_001094161.1 nuclear mitotic apparatus protein 1 [Rattus norvegicus]	1	68	1	1	35	29	29	33	30	27	35	39	34	0	0	0	0	0	0	1	1	0	0	0	0	0	0	0	1	1	0	43.6	0.5	0.5	234.99	2092	2092	1	2	0.0098151	0.9081	25.4	22.1	21.8
NP_001094176.1	NP_001094176.1	16	16	15	NP_001094176.1 long-chain fatty acid transport protein 4 [Rattus norvegicus]	1	16	16	15	3	5	2	6	7	6	5	5	8	3	5	2	6	7	6	5	5	8	2	4	2	6	6	5	5	4	7	26.7	26.7	24.6	72.188	643	643	1	49	0	25.56	5.8	11.7	3.6
NP_001094178.1;XP_017448101.1;XP_017448100.1;XP_008760994.1;XP_006236260.1;XP_006236262.1;XP_008760995.1	NP_001094178.1;XP_017448101.1;XP_017448100.1;XP_008760994.1;XP_006236260.1;XP_006236262.1;XP_008760995.1	4;4;4;4;3;3;3	3;3;3;3;3;3;3	3;3;3;3;3;3;3	NP_001094178.1 nuclear respiratory factor 1 [Rattus norvegicus];XP_017448101.1 PREDICTED: nuclear respiratory factor 1 isoform X2 [Rattus norvegicus];XP_017448100.1 PREDICTED: nuclear respiratory factor 1 isoform X2 [Rattus norvegicus];XP_008760994.1 PREDI	7	4	3	3	1	2	2	2	0	2	1	1	2	0	1	1	1	0	1	0	0	1	0	1	1	1	0	1	0	0	1	7.7	6	6	57.28	534	534;546;546;573;503;523;542	1	5	0	3.8409	1.7	3.9	3.9
NP_001094180.1	NP_001094180.1	8	8	8	NP_001094180.1 alpha-1,3/1,6-mannosyltransferase ALG2 [Rattus norvegicus]	1	8	8	8	2	4	2	3	2	4	2	3	3	2	4	2	3	2	4	2	3	3	2	4	2	3	2	4	2	3	3	27.7	27.7	27.7	47.318	415	415	1	30	0	49.937	7	14.7	8.2
NP_001094186.1	NP_001094186.1	2	2	2	NP_001094186.1 son of sevenless homolog 1 [Rattus norvegicus]	1	2	2	2	1	0	0	0	0	0	1	0	0	1	0	0	0	0	0	1	0	0	1	0	0	0	0	0	1	0	0	1.7	1.7	1.7	151.09	1319	1319	1	2	0.00055731	2.5053	0.8	0	0
NP_001094189.1	NP_001094189.1	21	21	21	NP_001094189.1 AP-3 complex subunit delta-1 [Rattus norvegicus]	1	21	21	21	8	9	11	9	14	12	8	10	6	8	9	11	9	14	12	8	10	6	8	9	11	9	14	12	8	10	6	22.3	22.3	22.3	135.67	1204	1204	1	99	0	137.44	10.4	11.4	14.5
NP_001094194.1	NP_001094194.1	2	2	2	NP_001094194.1 cathelicidin antimicrobial peptide precursor [Rattus norvegicus]	1	2	2	2	0	0	0	1	1	2	0	1	1	0	0	0	1	1	2	0	1	1	0	0	0	1	1	2	0	1	1	19.4	19.4	19.4	19.756	175	175	1	9	0	58.321	0	0	0
NP_001094195.1	NP_001094195.1	5	5	5	NP_001094195.1 exosome complex component RRP42 [Rattus norvegicus]	1	5	5	5	3	1	2	1	1	2	1	3	2	3	1	2	1	1	2	1	3	2	3	1	2	1	1	2	1	3	2	19.6	19.6	19.6	31.862	291	291	1	18	0	18.252	14.4	4.1	7.9
NP_001094197.1;XP_017457281.1;XP_017457269.1;XP_017457280.1;XP_017457268.1;XP_017457279.1;XP_017457267.1;XP_003752005.1;NP_001162058.1	NP_001094197.1	6;1;1;1;1;1;1;1;1	6;1;1;1;1;1;1;1;1	5;0;0;0;0;0;0;0;0	NP_001094197.1 RUN and FYVE domain-containing protein 1 [Rattus norvegicus]	9	6	6	5	1	1	3	1	0	1	2	1	2	1	1	3	1	0	1	2	1	2	1	1	3	0	0	1	1	1	2	8.3	8.3	7.2	80.376	711	711;437;437;453;453;605;605;606;606	1	12	0	6.4012	1.5	1.1	4.6
NP_001094198.1;XP_017452890.1	NP_001094198.1;XP_017452890.1	2;1	2;1	2;1	NP_001094198.1 coiled-coil domain-containing protein 43 [Rattus norvegicus];XP_017452890.1 PREDICTED: coiled-coil domain-containing protein 43 isoform X1 [Rattus norvegicus]	2	2	2	2	1	2	1	0	2	0	0	0	2	1	2	1	0	2	0	0	0	2	1	2	1	0	2	0	0	0	2	17.1	17.1	17.1	25.061	222	222;228	1	10	0	53.677	11.7	17.1	11.7
NP_001094202.1	NP_001094202.1	1	1	1	NP_001094202.1 8-oxo-dGDP phosphatase NUDT18 [Rattus norvegicus]	1	1	1	1	0	0	0	0	1	1	0	1	1	0	0	0	0	1	1	0	1	1	0	0	0	0	1	1	0	1	1	5	5	5	35.646	323	323	1	4	0	9.3249	0	0	0
NP_001094205.1	NP_001094205.1	6	6	6	NP_001094205.1 lysophosphatidylcholine acyltransferase 1 [Rattus norvegicus]	1	6	6	6	3	1	0	1	1	1	1	2	1	3	1	0	1	1	1	1	2	1	3	1	0	1	1	1	1	2	1	18.2	18.2	18.2	59.761	534	534	1	12	0	10.23	12.4	2.1	0
NP_001094210.1	NP_001094210.1	17	17	16	NP_001094210.1 metastasis-associated protein MTA2 [Rattus norvegicus]	1	17	17	16	5	9	7	8	9	10	10	12	12	5	9	7	8	9	10	10	12	12	5	9	7	8	9	10	9	12	11	33.7	33.7	32.2	74.959	668	668	1	87	0	129.53	10.8	18.9	16.2
NP_001094211.1;XP_006256362.1	NP_001094211.1;XP_006256362.1	23;12	23;12	23;12	NP_001094211.1 collagen alpha-2(VI) chain precursor [Rattus norvegicus];XP_006256362.1 PREDICTED: collagen alpha-2(VI) chain isoform X1 [Rattus norvegicus]	2	23	23	23	18	13	14	14	14	16	16	17	17	18	13	14	14	14	16	16	17	17	18	13	14	14	14	16	16	17	17	24.2	24.2	24.2	109.66	1027	1027;926	1	214	0	323.31	21.5	17.2	17.2
NP_001094220.1	NP_001094220.1	23	23	23	NP_001094220.1 succinyl-CoA ligase [GDP-forming] subunit beta, mitochondrial [Rattus norvegicus]	1	23	23	23	17	15	15	15	20	17	17	17	17	17	15	15	15	20	17	17	17	17	17	15	15	15	20	17	17	17	17	49.8	49.8	49.8	46.988	434	434	1	199	0	323.31	43.8	38.9	38.5
NP_001094236.1	NP_001094236.1	4	4	4	NP_001094236.1 biogenesis of lysosome-related organelles complex 1 subunit 4 [Rattus norvegicus]	1	4	4	4	1	0	0	1	2	1	2	1	0	1	0	0	1	2	1	2	1	0	1	0	0	1	2	1	2	1	0	31.2	31.2	31.2	23.284	215	215	1	9	0	17.129	14.9	0	0
NP_001094252.1	NP_001094252.1	4	3	3	NP_001094252.1 protein syndesmos [Rattus norvegicus]	1	4	3	3	0	1	2	2	1	2	1	2	1	0	0	1	1	1	2	0	2	1	0	0	1	1	1	2	0	2	1	21.8	16.6	16.6	23.388	211	211	1	8	0	12.955	0	5.2	10
NP_001094264.1	NP_001094264.1	2	2	2	NP_001094264.1 ribosome production factor 1 [Rattus norvegicus]	1	2	2	2	1	0	0	0	0	0	1	0	0	1	0	0	0	0	0	1	0	0	1	0	0	0	0	0	1	0	0	10.9	10.9	10.9	40.096	349	349	1	2	0.00020101	3.6173	7.4	0	0
NP_001094274.1	NP_001094274.1	3	3	3	NP_001094274.1 CD99 antigen precursor [Rattus norvegicus]	1	3	3	3	2	2	1	1	3	3	1	3	3	2	2	1	1	3	3	1	3	3	2	2	1	1	3	3	1	3	3	24.8	24.8	24.8	16.588	165	165	1	36	0	123.46	24.8	20	13.3
NP_001094276.1	NP_001094276.1	9	9	9	NP_001094276.1 fascin [Rattus norvegicus]	1	9	9	9	4	5	4	6	8	8	7	4	6	4	5	4	6	8	8	7	4	6	4	5	4	6	8	8	7	4	6	24.3	24.3	24.3	54.49	493	493	1	62	0	96.738	11	14.4	11
NP_001094293.1;XP_006257504.1	NP_001094293.1;XP_006257504.1	10;10	10;10	10;10	NP_001094293.1 WD repeat-containing protein 44 [Rattus norvegicus];XP_006257504.1 PREDICTED: WD repeat-containing protein 44 isoform X1 [Rattus norvegicus]	2	10	10	10	3	2	1	2	2	1	3	1	2	3	2	1	2	2	1	3	1	2	3	2	1	2	2	1	3	1	2	14.8	14.8	14.8	101.6	915	915;919	1	19	0	26.647	3.9	3.5	1.7
NP_001094301.1	NP_001094301.1	9	9	9	NP_001094301.1 26S proteasome non-ATPase regulatory subunit 8 [Rattus norvegicus]	1	9	9	9	6	6	3	5	6	7	5	5	5	6	6	3	5	6	7	5	5	5	6	6	3	5	6	7	5	5	5	31.4	31.4	31.4	39.877	353	353	1	63	0	77.719	25.2	22.7	13.9
NP_001094304.1	NP_001094304.1	17	17	17	NP_001094304.1 inorganic pyrophosphatase [Rattus norvegicus]	1	17	17	17	14	13	11	14	13	14	12	11	11	14	13	11	14	13	14	12	11	11	14	13	11	14	13	14	12	11	11	52.2	52.2	52.2	32.771	289	289	1	172	0	240.22	46.4	49.5	46.4
NP_001094310.1	NP_001094310.1	5	5	5	NP_001094310.1 thioredoxin domain-containing protein 12 precursor [Rattus norvegicus]	1	5	5	5	4	4	3	4	4	2	4	5	3	4	4	3	4	4	2	4	5	3	4	4	3	4	4	2	4	5	3	36.5	36.5	36.5	19.018	170	170	1	45	0	61.636	31.2	31.2	25.9
NP_001094328.1	NP_001094328.1	31	31	22	NP_001094328.1 DNA topoisomerase 2-beta [Rattus norvegicus]	1	31	31	22	13	11	7	11	14	21	16	16	16	13	11	7	11	14	21	16	16	16	9	10	6	9	13	15	9	10	11	23.7	23.7	17.8	181.96	1614	1614	1	138	0	131.31	9.2	8.5	6.1
NP_001094445.2;XP_008758511.2	NP_001094445.2;XP_008758511.2	26;25	26;25	26;25	NP_001094445.2 vacuolar protein sorting-associated protein 13A [Rattus norvegicus];XP_008758511.2 PREDICTED: vacuolar protein sorting-associated protein 13A isoform X1 [Rattus norvegicus]	2	26	26	26	12	9	11	6	7	5	3	5	2	12	9	11	6	7	5	3	5	2	12	9	11	6	7	5	3	5	2	12.2	12.2	12.2	360.05	3167	3167;3317	1	65	0	41.992	6.1	4.4	4.6
NP_001094457.1	NP_001094457.1	9	9	9	NP_001094457.1 intron-binding protein aquarius [Rattus norvegicus]	1	9	9	9	3	3	3	2	2	0	1	2	1	3	3	3	2	2	0	1	2	1	3	3	3	2	2	0	1	2	1	10.2	10.2	10.2	170.76	1484	1484	1	18	0	25.299	3.2	3.2	3.2
NP_001094465.1	NP_001094465.1	2	2	2	NP_001094465.1 transmembrane protein 65 [Rattus norvegicus]	1	2	2	2	0	1	1	1	1	2	1	1	0	0	1	1	1	1	2	1	1	0	0	1	1	1	1	2	1	1	0	8.8	8.8	8.8	27.901	261	261	1	8	0.00072189	2.1017	0	4.2	4.2
NP_001094470.1;XP_017456523.1	NP_001094470.1;XP_017456523.1	5;5	5;5	4;4	NP_001094470.1 microtubule-associated protein RP/EB family member 2 [Rattus norvegicus];XP_017456523.1 PREDICTED: microtubule-associated protein RP/EB family member 2 isoform X1, partial [Rattus norvegicus]	2	5	5	4	2	2	2	2	4	4	1	3	4	2	2	2	2	4	4	1	3	4	2	2	2	2	3	3	1	2	3	17.5	17.5	14.4	36.988	326	326;332	1	37	0	104.34	11.3	11.3	11.3
NP_001094480.1;XP_017460023.1;XP_008771501.1;XP_008756647.1;XP_017457673.1;XP_008756689.1;XP_017445908.1;XP_008758243.1;XP_017453987.1;XP_008759186.1	NP_001094480.1	4;1;1;1;1;1;1;1;1;1	4;1;1;1;1;1;1;1;1;1	4;1;1;1;1;1;1;1;1;1	NP_001094480.1 enoyl-CoA hydratase domain-containing protein 3, mitochondrial precursor [Rattus norvegicus]	10	4	4	4	1	2	1	1	1	0	0	1	0	1	2	1	1	1	0	0	1	0	1	2	1	1	1	0	0	1	0	19	19	19	32.385	300	300;565;835;835;1460;1460;1706;1719;1726;1727	1	7	0.00020117	3.6395	6	10.3	6.3
NP_001094481.1	NP_001094481.1	3	2	2	NP_001094481.1 NADH dehydrogenase [ubiquinone] flavoprotein 3, mitochondrial isoform 2 [Rattus norvegicus]	1	3	2	2	2	1	2	1	2	1	1	2	2	1	1	2	1	2	1	1	2	2	1	1	2	1	2	1	1	2	2	26.9	19.4	19.4	11.941	108	108	1	19	0	23.019	26.9	19.4	19.4
NP_001095275.1;XP_017453803.1;NP_001095853.1;XP_008767179.1;XP_017453802.1	NP_001095275.1;XP_017453803.1;NP_001095853.1;XP_008767179.1;XP_017453802.1	17;17;17;14;12	15;15;15;12;10	15;15;15;12;10	NP_001095275.1 sister chromatid cohesion protein PDS5 homolog B isoform 2 [Rattus norvegicus];XP_017453803.1 PREDICTED: sister chromatid cohesion protein PDS5 homolog B isoform X3 [Rattus norvegicus];NP_001095853.1 sister chromatid cohesion protein PDS5 ho	5	17	15	15	8	5	6	7	7	7	7	9	7	7	5	6	7	5	6	7	7	7	7	5	6	7	5	6	7	7	7	15.3	14.3	14.3	160.59	1413	1413;1447;1450;1191;989	1	65	0	60.9	7	4.5	5.6
NP_001095878.1	NP_001095878.1	2	2	2	NP_001095878.1 uridine-cytidine kinase 2 [Rattus norvegicus]	1	2	2	2	0	1	1	1	0	0	1	1	0	0	1	1	1	0	0	1	1	0	0	1	1	1	0	0	1	1	0	11.1	11.1	11.1	29.4	261	261	1	5	0.00019051	2.7708	0	5.7	5.4
NP_001095888.1	NP_001095888.1	7	1	1	NP_001095888.1 kininogen-1 isoform 2 precursor [Rattus norvegicus]	1	7	1	1	4	4	1	2	2	5	0	2	2	1	1	0	0	0	0	0	0	0	1	1	0	0	0	0	0	0	0	14.5	2.1	2.1	47.891	433	433	1	2	0.0064935	1.108	9.9	9	2.3
NP_001096832.1	NP_001096832.1	7	7	7	NP_001096832.1 nudC domain-containing protein 3 [Rattus norvegicus]	1	7	7	7	5	5	4	1	2	3	2	3	2	5	5	4	1	2	3	2	3	2	5	5	4	1	2	3	2	3	2	35.8	35.8	35.8	33.15	299	299	1	33	0	50.864	25.8	28.1	28.1
NP_001098083.1	NP_001098083.1	19	19	18	NP_001098083.1 heterogeneous nuclear ribonucleoproteins A2/B1 [Rattus norvegicus]	1	19	19	18	15	16	14	16	15	15	15	16	14	15	16	14	16	15	15	15	16	14	15	16	14	15	15	15	14	15	14	56.1	56.1	56.1	37.477	353	353	1	303	0	323.31	46.7	50.4	44.5
NP_001099148.1	NP_001099148.1	6	1	1	NP_001099148.1 ribose-phosphate pyrophosphokinase 3 [Rattus norvegicus]	1	6	1	1	3	5	4	4	5	4	3	5	5	1	1	1	1	1	1	1	1	1	1	1	1	1	1	1	1	1	1	24.8	6.3	6.3	34.852	318	318	1	12	0	48.538	13.5	20.8	15.7
NP_001099180.2	NP_001099180.2	45	45	44	NP_001099180.2 CAD protein [Rattus norvegicus]	1	45	45	44	14	26	23	22	26	18	26	26	23	14	26	23	22	26	18	26	26	23	14	26	23	21	26	18	25	26	23	28.9	28.9	28.5	243.47	2225	2225	1	242	0	215.35	9.8	17.8	15.3
NP_001099183.1;XP_017452496.1;XP_017452495.1;XP_006228076.1;NP_036760.1	NP_001099183.1;XP_017452496.1;XP_017452495.1	15;15;15;1;1	15;15;15;1;1	12;12;12;1;1	NP_001099183.1 protein kinase C alpha type [Rattus norvegicus];XP_017452496.1 PREDICTED: protein kinase C alpha type isoform X2 [Rattus norvegicus];XP_017452495.1 PREDICTED: protein kinase C alpha type isoform X1 [Rattus norvegicus]	5	15	15	12	7	8	5	5	7	7	5	8	6	7	8	5	5	7	7	5	8	6	4	7	4	4	5	5	3	6	4	28.1	28.1	23.7	72.782	636	636;672;688;646;697	1	61	0	54.614	14.8	17.9	11.5
NP_001099186.1	NP_001099186.1	2	2	2	NP_001099186.1 cellular retinoic acid-binding protein 1 [Rattus norvegicus]	1	2	2	2	1	1	1	1	1	1	0	0	1	1	1	1	1	1	1	0	0	1	1	1	1	1	1	1	0	0	1	19.7	19.7	19.7	15.591	137	137	1	7	0	8.362	9.5	9.5	9.5
NP_001099187.1;XP_006252159.1	NP_001099187.1;XP_006252159.1	23;23	19;19	18;18	NP_001099187.1 dihydropyrimidinase-related protein 2 [Rattus norvegicus];XP_006252159.1 PREDICTED: dihydropyrimidinase-related protein 2 isoform X1 [Rattus norvegicus]	2	23	19	18	19	20	18	17	17	20	18	18	20	16	17	16	14	15	16	15	15	17	15	16	15	13	14	15	14	14	16	58.4	49.5	47.2	62.277	572	572;673	1	261	0	323.31	54.7	54.9	50.3
NP_001099188.2	NP_001099188.2	25	25	25	NP_001099188.2 vacuolar protein sorting-associated protein 35 [Rattus norvegicus]	1	25	25	25	19	20	18	13	16	16	12	18	18	19	20	18	13	16	16	12	18	18	19	20	18	13	16	16	12	18	18	41.5	41.5	41.5	91.726	796	796	1	191	0	303.04	34.8	35.7	31.4
NP_001099196.1	NP_001099196.1	5	5	5	NP_001099196.1 phosphatidylglycerophosphatase and protein-tyrosine phosphatase 1 [Rattus norvegicus]	1	5	5	5	5	2	3	2	2	1	2	2	2	5	2	3	2	2	1	2	2	2	5	2	3	2	2	1	2	2	2	25.9	25.9	25.9	27.529	251	251	1	28	0	11.089	25.9	12	15.1
NP_001099197.2	NP_001099197.2	10	10	10	NP_001099197.2 proteasome subunit beta type-5 [Rattus norvegicus]	1	10	10	10	6	6	5	6	7	7	7	9	8	6	6	5	6	7	7	7	9	8	6	6	5	6	7	7	7	9	8	39.9	39.9	39.9	28.559	263	263	1	71	0	118.5	31.6	26.2	25.9
NP_001099200.1;XP_003752967.1;XP_002728474.1	NP_001099200.1;XP_003752967.1;XP_002728474.1	2;1;1	2;1;1	2;1;1	NP_001099200.1 40S ribosomal protein S28 [Rattus norvegicus];XP_003752967.1 PREDICTED: 40S ribosomal protein S28 [Rattus norvegicus];XP_002728474.1 PREDICTED: 40S ribosomal protein S28 [Rattus norvegicus]	3	2	2	2	2	2	2	2	2	2	2	2	2	2	2	2	2	2	2	2	2	2	2	2	2	2	2	2	2	2	2	30.4	30.4	30.4	7.8409	69	69;69;69	1	41	0	11.833	30.4	30.4	30.4
NP_001099201.3;XP_008772124.1	NP_001099201.3	11;1	11;1	11;1	NP_001099201.3 cGMP-dependent protein kinase 1 [Rattus norvegicus]	2	11	11	11	8	7	6	3	3	1	1	2	2	8	7	6	3	3	1	1	2	2	8	7	6	3	3	1	1	2	2	21.3	21.3	21.3	76.35	671	671;92	1	38	0	82.786	17.1	13.4	12.4
NP_001099214.2	NP_001099214.2	10	10	10	NP_001099214.2 eIF-2-alpha kinase GCN2 [Rattus norvegicus]	1	10	10	10	1	1	4	1	0	1	2	3	2	1	1	4	1	0	1	2	3	2	1	1	4	1	0	1	2	3	2	7.1	7.1	7.1	186.69	1649	1649	1	15	0	7.4179	0.8	0.7	3
NP_001099220.2;XP_008768409.1	NP_001099220.2;XP_008768409.1	3;2	3;2	3;2	NP_001099220.2 stromal interaction molecule 2 precursor [Rattus norvegicus];XP_008768409.1 PREDICTED: stromal interaction molecule 2 isoform X1 [Rattus norvegicus]	2	3	3	3	0	0	0	1	0	1	1	2	1	0	0	0	1	0	1	1	2	1	0	0	0	1	0	1	1	2	1	6.9	6.9	6.9	83.495	743	743;714	1	6	0.00019117	2.8052	0	0	0
NP_001099228.1	NP_001099228.1	4	4	4	NP_001099228.1 transmembrane emp24 domain-containing protein 7 precursor [Rattus norvegicus]	1	4	4	4	2	3	2	1	2	3	1	2	3	2	3	2	1	2	3	1	2	3	2	3	2	1	2	3	1	2	3	18.6	18.6	18.6	25.479	226	226	1	26	0	31.181	13.3	18.1	9.7
NP_001099229.2;XP_006252567.1;XP_006252565.1;XP_006252558.1;XP_017455079.1;XP_017455078.1;XP_017455090.1;XP_006252564.1;XP_006252563.1;XP_008769189.1;XP_006252561.1;XP_017455091.1;XP_006252555.1;XP_006252552.1;XP_006252550.1;XP_006252543.1;XP_017455089.1;XP_017455088.1;XP_017455087.1;XP_017455086.1;XP_017455085.1;XP_017455084.1;XP_017455083.1;XP_017455082.1;XP_017455081.1;XP_017455080.1;XP_017455…	NP_001099229.2;XP_006252567.1;XP_006252565.1;XP_006252558.1;XP_017455079.1;XP_017455078.1;XP_017455090.1;XP_006252564.1;XP_006252563.1;XP_008769189.1;XP_006252561.1;XP_017455091.1;XP_006252555.1;XP_006252552.1;XP_006252550.1;XP_006252543.1;XP_017455089.1;XP_017455088.1;XP_017455087.1;XP_017455086.1;XP_017455085.1;XP_017455084.1;XP_017455083.1;XP_017455082.1;XP_017455081.1;XP_017455080.1;XP_017455…	14;14;14;14;14;14;13;13;13;13;13;13;13;13;13;13;13;13;13;13;13;13;13;13;13;13;13;13;13;13;1;1;1;1;1;1;1;1;1;1;1;1;1;1	14;14;14;14;14;14;13;13;13;13;13;13;13;13;13;13;13;13;13;13;13;13;13;13;13;13;13;13;13;13;1;1;1;1;1;1;1;1;1;1;1;1;1;1	12;12;12;12;12;12;11;11;11;11;11;11;11;11;11;11;11;11;11;11;11;11;11;11;11;11;11;11;11;11;0;0;0;0;0;0;0;0;0;0;0;0;0;0	NP_001099229.2 dedicator of cytokinesis protein 9 [Rattus norvegicus];XP_006252567.1 PREDICTED: dedicator of cytokinesis protein 9 isoform X27 [Rattus norvegicus];XP_006252565.1 PREDICTED: dedicator of cytokinesis protein 9 isoform X25 [Rattus norvegicus];	44	14	14	12	4	2	5	2	3	1	2	5	5	4	2	5	2	3	1	2	5	5	4	2	4	1	2	1	0	4	4	9.3	9.3	8.5	234.8	2058	2058;2081;2090;2107;2214;2215;2088;2092;2093;2102;2103;2105;2113;2119;2129;2143;2176;2185;2189;2195;2196;2201;2203;2204;2213;2213;2225;2226;2226;2227;2060;2062;2077;2086;2093;2095;2194;2196;2201;2211;2215;2220;2227;2229	1	30	0	37.601	2.4	1.6	3.4
NP_001099230.2	NP_001099230.2	2	2	2	NP_001099230.2 protein prenyltransferase alpha subunit repeat-containing protein 1 [Rattus norvegicus]	1	2	2	2	0	1	0	1	0	0	0	0	1	0	1	0	1	0	0	0	0	1	0	1	0	1	0	0	0	0	1	4.9	4.9	4.9	48.223	425	425	1	3	0	3.9496	0	2.8	0
NP_001099240.1;XP_006245996.1	NP_001099240.1;XP_006245996.1	3;3	3;3	3;3	NP_001099240.1 zinc finger protein 598 [Rattus norvegicus];XP_006245996.1 PREDICTED: zinc finger protein 598 isoform X1 [Rattus norvegicus]	2	3	3	3	0	2	2	0	1	1	0	0	0	0	2	2	0	1	1	0	0	0	0	2	2	0	1	1	0	0	0	4.5	4.5	4.5	98.853	902	902;905	1	7	0	4.1603	0	3.2	2.9
NP_001099241.1	NP_001099241.1	9	9	9	NP_001099241.1 28S ribosomal protein S34, mitochondrial [Rattus norvegicus]	1	9	9	9	3	5	5	2	2	4	3	2	4	3	5	5	2	2	4	3	2	4	3	5	5	2	2	4	3	2	4	46.3	46.3	46.3	25.799	218	218	1	34	0	20.593	12.4	22.5	27.5
NP_001099247.2	NP_001099247.2	26	26	26	NP_001099247.2 arginine--tRNA ligase, cytoplasmic [Rattus norvegicus]	1	26	26	26	16	16	11	16	17	18	19	19	15	16	16	11	16	17	18	19	19	15	16	16	11	16	17	18	19	19	15	39.5	39.5	39.5	75.81	660	660	1	205	0	280.95	29.1	28.6	21.7
NP_001099251.1	NP_001099251.1	4	4	4	NP_001099251.1 39S ribosomal protein L22, mitochondrial precursor [Rattus norvegicus]	1	4	4	4	3	1	1	2	1	1	0	1	0	3	1	1	2	1	1	0	1	0	3	1	1	2	1	1	0	1	0	21.4	21.4	21.4	24.039	206	206	1	10	0	10.163	18	5.8	6.3
NP_001099264.2	NP_001099264.2	1	1	1	NP_001099264.2 N(alpha)-acetyltransferase 38, NatC auxiliary subunit [Rattus norvegicus]	1	1	1	1	0	0	0	1	0	0	1	0	0	0	0	0	1	0	0	1	0	0	0	0	0	1	0	0	1	0	0	15.2	15.2	15.2	13.4	125	125	1	2	0.00055006	2.3048	0	0	0
NP_001099266.2	NP_001099266.2	2	2	2	NP_001099266.2 arf-GAP with coiled-coil, ANK repeat and PH domain-containing protein 1 [Rattus norvegicus]	1	2	2	2	0	0	0	0	0	0	0	2	0	0	0	0	0	0	0	0	2	0	0	0	0	0	0	0	0	2	0	5.5	5.5	5.5	81.68	740	740	1	2	0.0001899	2.7435	0	0	0
NP_001099273.2	NP_001099273.2	4	4	4	NP_001099273.2 stromal cell-derived factor 2 precursor [Rattus norvegicus]	1	4	4	4	2	2	2	0	2	1	1	1	3	2	2	2	0	2	1	1	1	3	2	2	2	0	2	1	1	1	3	34.7	34.7	34.7	24.056	219	219	1	17	0	20.538	16.9	13.2	13.2
NP_001099275.1	NP_001099275.1	5	5	5	NP_001099275.1 thioredoxin domain-containing protein 17 [Rattus norvegicus]	1	5	5	5	3	3	3	3	3	3	3	4	4	3	3	3	3	3	3	3	4	4	3	3	3	3	3	3	3	4	4	43.9	43.9	43.9	14.092	123	123	1	30	0	69.262	26	30.1	30.1
NP_001099277.1;XP_008766181.1	NP_001099277.1;XP_008766181.1	1;1	1;1	1;1	NP_001099277.1 max-binding protein MNT [Rattus norvegicus];XP_008766181.1 PREDICTED: max-binding protein MNT isoform X1 [Rattus norvegicus]	2	1	1	1	0	0	0	0	1	1	0	0	0	0	0	0	0	1	1	0	0	0	0	0	0	0	1	1	0	0	0	2.4	2.4	2.4	46.081	425	425;590	1	2	0.00019893	3.4536	0	0	0
NP_001099283.1;XP_006246961.1	NP_001099283.1;XP_006246961.1	9;8	9;8	9;8	NP_001099283.1 vacuolar protein sorting-associated protein 53 homolog [Rattus norvegicus];XP_006246961.1 PREDICTED: vacuolar protein sorting-associated protein 53 homolog isoform X1 [Rattus norvegicus]	2	9	9	9	4	3	0	2	3	2	1	3	4	4	3	0	2	3	2	1	3	4	4	3	0	2	3	2	1	3	4	15.5	15.5	15.5	94.428	832	832;709	1	23	0	7.853	7.9	4.4	0
NP_001099284.1	NP_001099284.1	9	9	8	NP_001099284.1 active breakpoint cluster region-related protein [Rattus norvegicus]	1	9	9	8	8	3	2	4	5	3	4	2	5	8	3	2	4	5	3	4	2	5	7	3	2	3	4	2	3	1	4	16.2	16.2	15	97.692	859	859	1	44	0	46.047	15.1	5.4	4.5
NP_001099285.1;XP_006246997.1	NP_001099285.1;XP_006246997.1	2;1	2;1	2;1	NP_001099285.1 intraflagellar transport protein 20 homolog [Rattus norvegicus];XP_006246997.1 PREDICTED: intraflagellar transport protein 20 homolog isoform X1 [Rattus norvegicus]	2	2	2	2	1	1	0	2	0	1	1	1	0	1	1	0	2	0	1	1	1	0	1	1	0	2	0	1	1	1	0	17.2	17.2	17.2	18.12	157	157;132	1	8	0	8.6873	8.9	8.3	0
NP_001099294.1;XP_008772036.1	NP_001099294.1;XP_008772036.1	5;5	3;3	3;3	NP_001099294.1 TATA-binding protein-associated factor 2N [Rattus norvegicus];XP_008772036.1 PREDICTED: TATA-binding protein-associated factor 2N-like [Rattus norvegicus]	2	5	3	3	3	4	4	2	4	4	3	3	4	1	2	2	1	2	2	1	1	2	1	2	2	1	2	2	1	1	2	22.3	18.8	18.8	43.248	394	394;560	1	17	0	30.865	7.9	17.8	17.8
NP_001099298.2	NP_001099298.2	3	3	3	NP_001099298.2 transcription elongation factor SPT4 [Rattus norvegicus]	1	3	3	3	1	0	0	0	0	0	1	0	2	1	0	0	0	0	0	1	0	2	1	0	0	0	0	0	1	0	2	25.6	25.6	25.6	13.193	117	117	1	4	0.00054935	2.2918	13.7	0	0
NP_001099301.1	NP_001099301.1	5	5	5	NP_001099301.1 39S ribosomal protein L27, mitochondrial [Rattus norvegicus]	1	5	5	5	2	1	3	1	3	3	1	2	4	2	1	3	1	3	3	1	2	4	2	1	3	1	3	3	1	2	4	42.6	42.6	42.6	15.823	148	148	1	21	0	11.475	18.9	8.8	29.7
NP_001099304.1	NP_001099304.1	7	7	7	NP_001099304.1 39S ribosomal protein L45, mitochondrial [Rattus norvegicus]	1	7	7	7	2	2	1	3	1	4	3	4	4	2	2	1	3	1	4	3	4	4	2	2	1	3	1	4	3	4	4	29.1	29.1	29.1	35.439	306	306	1	26	0	19.308	14.4	12.1	9.2
NP_001099307.1	NP_001099307.1	8	8	2	NP_001099307.1 eukaryotic translation initiation factor 1 [Rattus norvegicus]	1	8	8	2	5	5	5	4	6	7	5	7	7	5	5	5	4	6	7	5	7	7	1	1	1	2	2	2	2	2	2	44.2	44.2	29.2	12.746	113	113	1	77	0	269.07	44.2	44.2	44.2
NP_001099310.2	NP_001099310.2	8	5	5	NP_001099310.2 ras-related protein Rab-5C [Rattus norvegicus]	1	8	5	5	8	6	8	7	6	7	7	7	8	5	4	5	4	5	4	5	4	5	5	4	5	4	5	4	5	4	5	53.2	38.4	38.4	23.425	216	216	1	66	0	115.63	53.2	43.1	53.2
NP_001099311.1	NP_001099311.1	20	20	20	NP_001099311.1 caveolae-associated protein 1 [Rattus norvegicus]	1	20	20	20	15	17	14	15	15	16	17	16	15	15	17	14	15	15	16	17	16	15	15	17	14	15	15	16	17	16	15	54.3	54.3	54.3	43.908	392	392	1	267	0	323.31	51.3	51.3	41.6
NP_001099313.1	NP_001099313.1	3	3	3	NP_001099313.1 protein LSM12 homolog [Rattus norvegicus]	1	3	3	3	1	1	1	0	0	2	1	1	1	1	1	1	0	0	2	1	1	1	1	1	1	0	0	2	1	1	1	26.2	26.2	26.2	21.701	195	195	1	8	0.00019201	2.8752	6.7	7.2	7.2
NP_001099316.1;XP_008766489.1;XP_008766488.1;XP_006247564.1;XP_006247563.1;XP_006247562.1;XP_006247561.1;XP_006247560.1	NP_001099316.1;XP_008766489.1;XP_008766488.1;XP_006247564.1;XP_006247563.1;XP_006247562.1;XP_006247561.1;XP_006247560.1	5;5;5;5;5;5;5;5	5;5;5;5;5;5;5;5	5;5;5;5;5;5;5;5	NP_001099316.1 formin-like protein 1 [Rattus norvegicus];XP_008766489.1 PREDICTED: formin-like protein 1 isoform X7 [Rattus norvegicus];XP_008766488.1 PREDICTED: formin-like protein 1 isoform X6 [Rattus norvegicus];XP_006247564.1 PREDICTED: formin-like pro	8	5	5	5	1	0	0	0	2	0	0	3	1	1	0	0	0	2	0	0	3	1	1	0	0	0	2	0	0	3	1	8.7	8.7	8.7	115.53	1034	1034;1043;1053;1091;1091;1095;1097;1101	1	7	0	7.0391	2.6	0	0
NP_001099326.1	NP_001099326.1	2	2	2	NP_001099326.1 charged multivesicular body protein 6 [Rattus norvegicus]	1	2	2	2	2	2	1	1	1	1	2	0	0	2	2	1	1	1	1	2	0	0	2	2	1	1	1	1	2	0	0	12.5	12.5	12.5	23.288	200	200	1	12	0	26.423	12.5	12.5	6
NP_001099327.1;XP_008766696.1;XP_008766694.1;XP_008766695.2	NP_001099327.1;XP_008766696.1;XP_008766694.1;XP_008766695.2	3;3;3;3	2;2;2;2	2;2;2;2	NP_001099327.1 pyrroline-5-carboxylate reductase 1, mitochondrial [Rattus norvegicus];XP_008766696.1 PREDICTED: pyrroline-5-carboxylate reductase 1, mitochondrial isoform X3 [Rattus norvegicus];XP_008766694.1 PREDICTED: pyrroline-5-carboxylate reductase 1,	4	3	2	2	1	1	1	1	2	2	1	2	1	0	0	0	0	1	1	0	1	0	0	0	0	0	1	1	0	1	0	14.9	11.3	11.3	32.226	309	309;357;383;431	1	3	0	4.443	3.6	3.6	3.6
NP_001099329.1	NP_001099329.1	6	6	6	NP_001099329.1 alpha-N-acetylgalactosaminide alpha-2,6-sialyltransferase 1 precursor [Rattus norvegicus]	1	6	6	6	4	3	3	1	1	1	2	2	3	4	3	3	1	1	1	2	2	3	4	3	3	1	1	1	2	2	3	14.4	14.4	14.4	59.691	520	520	1	20	0	12.031	8.7	6.9	7.7
NP_001099334.1	NP_001099334.1	1	1	1	NP_001099334.1 scavenger receptor class F member 2 precursor [Rattus norvegicus]	1	1	1	1	0	0	0	1	0	0	0	0	0	0	0	0	1	0	0	0	0	0	0	0	0	1	0	0	0	0	0	1.4	1.4	1.4	87.951	833	833	1	1	0.0082658	1.0219	0	0	0
NP_001099339.1	NP_001099339.1	7	7	7	NP_001099339.1 replication factor C subunit 4 [Rattus norvegicus]	1	7	7	7	1	0	1	1	0	1	2	1	2	1	0	1	1	0	1	2	1	2	1	0	1	1	0	1	2	1	2	26.4	26.4	26.4	39.956	364	364	1	9	0	6.2807	2.7	0	8
NP_001099345.1	NP_001099345.1	4	4	4	NP_001099345.1 coiled-coil domain-containing protein 58 [Rattus norvegicus]	1	4	4	4	1	2	4	3	3	3	2	3	4	1	2	4	3	3	3	2	3	4	1	2	4	3	3	3	2	3	4	37.5	37.5	37.5	16.69	144	144	1	29	0	56.215	11.8	20.8	37.5
NP_001099350.1	NP_001099350.1	1	1	1	NP_001099350.1 zinc finger and BTB domain-containing protein 20 [Rattus norvegicus]	1	1	1	1	0	0	1	0	0	0	0	0	0	0	0	1	0	0	0	0	0	0	0	0	1	0	0	0	0	0	0	3.1	3.1	3.1	73.42	668	668	1	1	0.0030928	1.4613	0	0	3.1
NP_001099351.1;NP_001296733.1;XP_017453650.1	NP_001099351.1;NP_001296733.1;XP_017453650.1	6;6;4	6;6;4	6;6;4	NP_001099351.1 N-alpha-acetyltransferase 50 isoform 2 [Rattus norvegicus];NP_001296733.1 N-alpha-acetyltransferase 50 isoform 1 [Rattus norvegicus];XP_017453650.1 PREDICTED: N-alpha-acetyltransferase 50-like [Rattus norvegicus]	3	6	6	6	0	0	2	1	2	2	4	3	1	0	0	2	1	2	2	4	3	1	0	0	2	1	2	2	4	3	1	26.2	26.2	26.2	19.301	168	168;169;95	1	18	0	5.7767	0	0	13.1
NP_001099353.1;XP_006248400.1;XP_006248397.1	NP_001099353.1;XP_006248400.1;XP_006248397.1	2;2;2	2;2;2	2;2;2	NP_001099353.1 nectin-3 [Rattus norvegicus];XP_006248400.1 PREDICTED: nectin-3 isoform X2 [Rattus norvegicus];XP_006248397.1 PREDICTED: nectin-3 isoform X1 [Rattus norvegicus]	3	2	2	2	2	0	0	0	2	2	0	0	1	2	0	0	0	2	2	0	0	1	2	0	0	0	2	2	0	0	1	9.8	9.8	9.8	55.989	509	509;514;565	1	7	0	16.787	9.8	0	0
NP_001099367.2	NP_001099367.2	26	26	26	NP_001099367.2 T-complex protein 1 subunit theta [Rattus norvegicus]	1	26	26	26	21	22	16	20	18	17	20	16	19	21	22	16	20	18	17	20	16	19	21	22	16	20	18	17	20	16	19	49.8	49.8	49.8	59.588	548	548	1	231	0	204.13	42.9	41.2	34.9
NP_001099372.1	NP_001099372.1	1	1	1	NP_001099372.1 peroxisomal membrane protein 11C [Rattus norvegicus]	1	1	1	1	1	0	0	1	0	1	1	0	0	1	0	0	1	0	1	1	0	0	1	0	0	1	0	1	1	0	0	5.8	5.8	5.8	26.865	241	241	1	4	0.0002	3.5258	5.8	0	0
NP_001099377.2	NP_001099377.2	8	8	8	NP_001099377.2 transformation/transcription domain-associated protein [Rattus norvegicus]	1	8	8	8	2	1	1	2	0	1	1	1	0	2	1	1	2	0	1	1	1	0	2	1	1	2	0	1	1	1	0	2.5	2.5	2.5	435.63	3846	3846	1	9	0	8.8124	0.6	0.4	0.2
NP_001099385.2;XP_006249063.1	NP_001099385.2;XP_006249063.1	7;7	7;7	7;7	NP_001099385.2 N-acetylserotonin O-methyltransferase-like protein [Rattus norvegicus];XP_006249063.1 PREDICTED: N-acetylserotonin O-methyltransferase-like protein isoform X1 [Rattus norvegicus]	2	7	7	7	4	4	3	6	5	3	2	5	4	4	4	3	6	5	3	2	5	4	4	4	3	6	5	3	2	5	4	34.5	34.5	34.5	24.25	226	226;263	1	41	0	77.819	24.3	23.9	18.1
NP_001099391.1	NP_001099391.1	2	2	2	NP_001099391.1 DNA-directed RNA polymerase II subunit RPB11-a [Rattus norvegicus]	1	2	2	2	2	1	1	0	0	1	0	1	1	2	1	1	0	0	1	0	1	1	2	1	1	0	0	1	0	1	1	27.4	27.4	27.4	13.293	117	117	1	7	0	7.1488	27.4	14.5	14.5
NP_001099398.1;XP_006249394.1	NP_001099398.1;XP_006249394.1	6;4	6;4	6;4	NP_001099398.1 vacuolar protein sorting-associated protein 37B [Rattus norvegicus];XP_006249394.1 PREDICTED: vacuolar protein sorting-associated protein 37B isoform X1 [Rattus norvegicus]	2	6	6	6	2	1	2	0	1	3	3	2	1	2	1	2	0	1	3	3	2	1	2	1	2	0	1	3	3	2	1	39.6	39.6	39.6	31.111	285	285;307	1	16	0	40.145	16.1	8.4	12.3
NP_001099402.1;XP_006249424.1	NP_001099402.1;XP_006249424.1	8;7	8;7	8;7	NP_001099402.1 vacuolar protein sorting-associated protein 29 [Rattus norvegicus];XP_006249424.1 PREDICTED: vacuolar protein sorting-associated protein 29 isoform X1 [Rattus norvegicus]	2	8	8	8	6	6	5	3	3	6	4	6	4	6	6	5	3	3	6	4	6	4	6	6	5	3	3	6	4	6	4	48.9	48.9	48.9	20.468	182	182;186	1	57	0	36.683	40.7	40.7	33
NP_001099403.1	NP_001099403.1	6	6	6	NP_001099403.1 actin-related protein 2/3 complex subunit 3 [Rattus norvegicus]	1	6	6	6	3	5	2	4	3	4	4	5	6	3	5	2	4	3	4	4	5	6	3	5	2	4	3	4	4	5	6	32.6	32.6	32.6	20.535	178	178	1	53	0	46.543	19.7	28.7	9
NP_001099404.1;XP_017452659.1	NP_001099404.1	6;1	6;1	5;0	NP_001099404.1 protein unc-119 homolog B [Rattus norvegicus]	2	6	6	5	1	1	2	0	1	2	3	0	2	1	1	2	0	1	2	3	0	2	1	1	2	0	1	1	3	0	1	36.3	36.3	32.7	28.407	251	251;190	1	12	0	9.84	4	13.1	17.1
NP_001099406.1	NP_001099406.1	2	2	2	NP_001099406.1 iron-sulfur cluster assembly enzyme ISCU, mitochondrial [Rattus norvegicus]	1	2	2	2	1	1	1	1	1	1	0	1	1	1	1	1	1	1	1	0	1	1	1	1	1	1	1	1	0	1	1	10.2	10.2	10.2	17.967	167	167	1	9	0.0027778	1.5732	4.8	5.4	5.4
NP_001099411.2	NP_001099411.2	1	1	1	NP_001099411.2 biogenesis of lysosome-related organelles complex 1 subunit 1 [Rattus norvegicus]	1	1	1	1	1	0	0	0	0	0	0	0	0	1	0	0	0	0	0	0	0	0	1	0	0	0	0	0	0	0	0	8.8	8.8	8.8	14.311	125	125	1	1	0.00072228	2.1033	8.8	0	0
NP_001099414.1;XP_017456681.1;XP_006255293.1;XP_006255291.1	NP_001099414.1;XP_017456681.1;XP_006255293.1;XP_006255291.1	2;2;2;2	2;2;2;2	2;2;2;2	NP_001099414.1 MHC class II regulatory factor RFX1 [Rattus norvegicus];XP_017456681.1 PREDICTED: MHC class II regulatory factor RFX1 isoform X3 [Rattus norvegicus];XP_006255293.1 PREDICTED: MHC class II regulatory factor RFX1 isoform X2 [Rattus norvegicus]	4	2	2	2	0	0	0	1	1	0	0	0	0	0	0	0	1	1	0	0	0	0	0	0	0	1	1	0	0	0	0	2.6	2.6	2.6	103.73	964	964;972;1021;1074	1	2	0.0024352	1.5943	0	0	0
NP_001099416.1	NP_001099416.1	3	3	3	NP_001099416.1 uncharacterized protein C19orf43 homolog [Rattus norvegicus]	1	3	3	3	2	2	2	1	1	0	1	1	3	2	2	2	1	1	0	1	1	3	2	2	2	1	1	0	1	1	3	23.1	23.1	23.1	18.472	173	173	1	15	0	7.6153	15.6	15.6	15.6
NP_001099434.1;XP_008767845.1	NP_001099434.1;XP_008767845.1	3;3	3;3	3;3	NP_001099434.1 kinesin-associated protein 3 [Rattus norvegicus];XP_008767845.1 PREDICTED: kinesin-associated protein 3 isoform X1 [Rattus norvegicus]	2	3	3	3	2	0	0	0	0	1	0	0	1	2	0	0	0	0	1	0	0	1	2	0	0	0	0	1	0	0	1	4.7	4.7	4.7	84.267	728	728;794	1	4	0.00019015	2.7558	2.9	0	0
NP_001099445.1;XP_003750285.1;XP_001072867.1	NP_001099445.1	14;2;2	14;2;2	14;2;2	NP_001099445.1 adenylosuccinate synthetase isozyme 2 [Rattus norvegicus]	3	14	14	14	12	9	11	8	10	7	7	10	9	12	9	11	8	10	7	7	10	9	12	9	11	8	10	7	7	10	9	38.2	38.2	38.2	50.085	456	456;457;457	1	105	0	137.97	36.4	25.4	31.8
NP_001099446.1	NP_001099446.1	5	5	5	NP_001099446.1 COX20 cytochrome C oxidase assembly factor [Rattus norvegicus]	1	5	5	5	2	1	0	1	1	1	2	2	2	2	1	0	1	1	1	2	2	2	2	1	0	1	1	1	2	2	2	43.6	43.6	43.6	13.078	117	117	1	14	0	13.51	30.8	11.1	0
NP_001099456.1	NP_001099456.1	1	1	1	NP_001099456.1 lysophospholipase-like protein 1 [Rattus norvegicus]	1	1	1	1	1	0	0	0	0	1	0	0	0	1	0	0	0	0	1	0	0	0	1	0	0	0	0	1	0	0	0	18.1	18.1	18.1	15.272	138	138	1	3	0.00019877	3.4398	18.1	0	0
NP_001099467.1;XP_003750557.1;XP_008774932.2	NP_001099467.1;XP_003750557.1	6;6;2	6;6;2	6;6;2	NP_001099467.1 39S ribosomal protein L1, mitochondrial [Rattus norvegicus];XP_003750557.1 PREDICTED: 39S ribosomal protein L1, mitochondrial isoform X1 [Rattus norvegicus]	3	6	6	6	2	1	0	2	2	1	3	1	2	2	1	0	2	2	1	3	1	2	2	1	0	2	2	1	3	1	2	24.5	24.5	24.5	36.115	323	323;328;298	1	14	0	20.659	7.4	5.3	0
NP_001099472.1	NP_001099472.1	23	23	23	NP_001099472.1 DNA-directed RNA polymerase II subunit RPB2 [Rattus norvegicus]	1	23	23	23	14	10	11	5	11	10	6	14	12	14	10	11	5	11	10	6	14	12	14	10	11	5	11	10	6	14	12	26.1	26.1	26.1	133.9	1174	1174	1	100	0	89.237	17.4	12.7	13
NP_001099474.1	NP_001099474.1	3	3	3	NP_001099474.1 COMM domain-containing protein 8 [Rattus norvegicus]	1	3	3	3	1	3	3	1	1	1	1	1	2	1	3	3	1	1	1	1	1	2	1	3	3	1	1	1	1	1	2	21.3	21.3	21.3	20.767	183	183	1	14	0	8.1968	8.7	21.3	21.3
NP_001099475.1;XP_006251098.1	NP_001099475.1;XP_006251098.1	6;5	3;2	3;2	NP_001099475.1 glucosamine-6-phosphate isomerase 2 [Rattus norvegicus];XP_006251098.1 PREDICTED: glucosamine-6-phosphate isomerase 2 isoform X1 [Rattus norvegicus]	2	6	3	3	4	3	2	3	3	2	3	1	2	2	1	0	1	1	1	1	0	1	2	1	0	1	1	1	1	0	1	36.6	21	21	31.006	276	276;274	1	8	0	13.177	27.9	15.9	11.6
NP_001099476.1;XP_017454596.1	NP_001099476.1;XP_017454596.1	8;4	8;4	8;4	NP_001099476.1 ubiquitin-conjugating enzyme E2 K [Rattus norvegicus];XP_017454596.1 PREDICTED: ubiquitin-conjugating enzyme E2 K isoform X1 [Rattus norvegicus]	2	8	8	8	5	6	5	6	6	5	5	4	6	5	6	5	6	6	5	5	4	6	5	6	5	6	6	5	5	4	6	52	52	52	22.406	200	200;97	1	56	0	74.064	41.5	48.5	37
NP_001099483.1;XP_006251254.1	NP_001099483.1;XP_006251254.1	2;2	2;2	2;2	NP_001099483.1 nucleolar protein 14 [Rattus norvegicus];XP_006251254.1 PREDICTED: nucleolar protein 14 isoform X1 [Rattus norvegicus]	2	2	2	2	0	1	0	0	0	0	0	1	0	0	1	0	0	0	0	0	1	0	0	1	0	0	0	0	0	1	0	3.3	3.3	3.3	72.875	640	640;862	1	2	0.00037313	2.5437	0	1.9	0
NP_001099492.1	NP_001099492.1	3	3	3	NP_001099492.1 prdX-deacylase domain-containing protein 1 [Rattus norvegicus]	1	3	3	3	1	1	1	1	1	2	1	2	2	1	1	1	1	1	2	1	2	2	1	1	1	1	1	2	1	2	2	16.6	16.6	16.6	18.781	169	169	1	15	0.00019904	3.4582	8.3	4.1	8.3
NP_001099509.1;XP_008768897.1	NP_001099509.1;XP_008768897.1	4;3	4;3	4;3	NP_001099509.1 magnesium-dependent phosphatase 1 [Rattus norvegicus];XP_008768897.1 PREDICTED: magnesium-dependent phosphatase 1 isoform X1 [Rattus norvegicus]	2	4	4	4	4	2	2	3	2	2	3	2	2	4	2	2	3	2	2	3	2	2	4	2	2	3	2	2	3	2	2	35.4	35.4	35.4	18.61	164	164;182	1	33	0	115.49	35.4	18.9	18.9
NP_001099511.1;XP_006252103.1	NP_001099511.1;XP_006252103.1	3;3	3;3	3;3	NP_001099511.1 cathepsin G precursor [Rattus norvegicus];XP_006252103.1 PREDICTED: cathepsin G isoform X1 [Rattus norvegicus]	2	3	3	3	0	0	0	1	2	3	0	0	0	0	0	0	1	2	3	0	0	0	0	0	0	1	2	3	0	0	0	13.2	13.2	13.2	27.804	250	250;285	1	9	0	14.366	0	0	0
NP_001099512.1;XP_006252124.1;XP_006252125.1	NP_001099512.1;XP_006252124.1;XP_006252125.1	7;7;5	7;7;5	7;7;5	NP_001099512.1 exportin-4 [Rattus norvegicus];XP_006252124.1 PREDICTED: exportin-4 isoform X1 [Rattus norvegicus];XP_006252125.1 PREDICTED: exportin-4 isoform X2 [Rattus norvegicus]	3	7	7	7	4	2	1	0	1	2	1	2	0	4	2	1	0	1	2	1	2	0	4	2	1	0	1	2	1	2	0	8.6	8.6	8.6	129.66	1148	1148;1151;1077	1	14	0	72.962	5.4	2.6	1.5
NP_001099525.2;XP_017455408.1	NP_001099525.2;XP_017455408.1	3;2	3;2	3;2	NP_001099525.2 probable E3 ubiquitin-protein ligase MYCBP2 [Rattus norvegicus];XP_017455408.1 PREDICTED: probable E3 ubiquitin-protein ligase MYCBP2 isoform X1 [Rattus norvegicus]	2	3	3	3	1	1	0	0	0	0	0	0	1	1	1	0	0	0	0	0	0	1	1	1	0	0	0	0	0	0	1	1.1	1.1	1.1	520.85	4749	4749;1048	1	3	0	5.2237	0.5	0.3	0
NP_001099529.1	NP_001099529.1	2	2	2	NP_001099529.1 THO complex subunit 3 [Rattus norvegicus]	1	2	2	2	2	0	1	0	1	2	0	1	0	2	0	1	0	1	2	0	1	0	2	0	1	0	1	2	0	1	0	5.4	5.4	5.4	38.795	351	351	1	7	0.0034083	1.3769	5.4	0	2.8
NP_001099530.1;XP_017455506.1;XP_017455505.1;XP_017455504.1;XP_017455503.1;XP_017455502.1;XP_006252607.1;XP_006252606.1;XP_006252605.1;XP_006252604.1;XP_017455501.1;XP_017455500.1;XP_006252603.1;XP_017455508.1;XP_008769203.1;XP_006252615.1;XP_017455507.1;XP_006252612.1	NP_001099530.1;XP_017455506.1;XP_017455505.1;XP_017455504.1;XP_017455503.1;XP_017455502.1;XP_006252607.1;XP_006252606.1;XP_006252605.1;XP_006252604.1;XP_017455501.1;XP_017455500.1;XP_006252603.1;XP_017455508.1;XP_008769203.1;XP_006252615.1;XP_017455507.1;XP_006252612.1	28;28;28;28;28;28;28;28;28;28;28;28;28;27;26;24;24;24	28;28;28;28;28;28;28;28;28;28;28;28;28;27;26;24;24;24	5;5;5;5;5;5;5;5;5;5;5;5;5;4;3;5;5;5	NP_001099530.1 sarcolemmal membrane-associated protein [Rattus norvegicus];XP_017455506.1 PREDICTED: sarcolemmal membrane-associated protein isoform X11 [Rattus norvegicus];XP_017455505.1 PREDICTED: sarcolemmal membrane-associated protein isoform X9 [Rattu	18	28	28	5	16	16	18	16	16	16	19	17	17	16	16	18	16	16	16	19	17	17	1	0	2	1	1	2	1	1	0	34.3	34.3	9.5	90.559	787	787;790;807;807;811;821;824;828;828;842;845;845;845;713;718;749;770;804	1	225	0	323.31	20.7	18.4	25
NP_001099534.1;XP_006252859.1;XP_006252858.1	NP_001099534.1;XP_006252859.1;XP_006252858.1	7;7;7	7;7;7	7;7;7	NP_001099534.1 calcium homeostasis endoplasmic reticulum protein [Rattus norvegicus];XP_006252859.1 PREDICTED: calcium homeostasis endoplasmic reticulum protein isoform X2 [Rattus norvegicus];XP_006252858.1 PREDICTED: calcium homeostasis endoplasmic reticu	3	7	7	7	2	2	1	1	1	4	2	4	5	2	2	1	1	1	4	2	4	5	2	2	1	1	1	4	2	4	5	8.2	8.2	8.2	105.92	935	935;942;946	1	22	0	9.6355	1.9	2	0.9
NP_001099536.1	NP_001099536.1	8	8	8	NP_001099536.1 6-phosphogluconolactonase [Rattus norvegicus]	1	8	8	8	7	8	7	8	8	8	7	8	7	7	8	7	8	8	8	7	8	7	7	8	7	8	8	8	7	8	7	46.7	46.7	46.7	30.821	291	291	1	117	0	117.58	41.2	46.7	40.9
NP_001099537.1	NP_001099537.1	9	9	9	NP_001099537.1 procollagen galactosyltransferase 1 precursor [Rattus norvegicus]	1	9	9	9	4	2	1	5	3	1	3	0	1	4	2	1	5	3	1	3	0	1	4	2	1	5	3	1	3	0	1	18.6	18.6	18.6	71.114	617	617	1	20	0	13.964	7.1	3.4	2.3
NP_001099540.1	NP_001099540.1	5	5	5	NP_001099540.1 microtubule-associated protein 1S [Rattus norvegicus]	1	5	5	5	5	4	5	1	3	0	1	4	2	5	4	5	1	3	0	1	4	2	5	4	5	1	3	0	1	4	2	6.7	6.7	6.7	102.8	972	972	1	26	0	37.896	6.7	5.1	6.7
NP_001099543.1	NP_001099543.1	5	5	5	NP_001099543.1 U6 snRNA-associated Sm-like protein LSm4 [Rattus norvegicus]	1	5	5	5	2	2	2	1	3	4	0	3	3	2	2	2	1	3	4	0	3	3	2	2	2	1	3	4	0	3	3	25.4	25.4	25.4	15.204	138	138	1	21	0	16.976	10.9	12.3	12.3
NP_001099549.2	NP_001099549.2	17	17	17	NP_001099549.2 manganese-transporting ATPase 13A1 [Rattus norvegicus]	1	17	17	17	4	6	6	6	2	6	6	7	10	4	6	6	6	2	6	6	7	10	4	6	6	6	2	6	6	7	10	19.9	19.9	19.9	131.91	1197	1197	1	56	0	58.485	6.2	7.3	7.3
NP_001099555.1	NP_001099555.1	2	2	2	NP_001099555.1 dynactin subunit 6 [Rattus norvegicus]	1	2	2	2	1	0	1	1	0	0	1	1	1	1	0	1	1	0	0	1	1	1	1	0	1	1	0	0	1	1	1	14.2	14.2	14.2	20.666	190	190	1	8	0	34.614	9.5	0	9.5
NP_001099562.2	NP_001099562.2	15	15	15	NP_001099562.2 vacuolar protein-sorting-associated protein 36 [Rattus norvegicus]	1	15	15	15	5	7	4	3	2	2	5	3	4	5	7	4	3	2	2	5	3	4	5	7	4	3	2	2	5	3	4	39.6	39.6	39.6	43.717	386	386	1	36	0	35.292	19.4	21.5	15
NP_001099563.1;NP_001128484.1;NP_001008861.2	NP_001099563.1;NP_001128484.1	6;6;1	6;6;1	6;6;1	NP_001099563.1 ubiquitin carboxyl-terminal hydrolase 4 isoform b [Rattus norvegicus];NP_001128484.1 ubiquitin carboxyl-terminal hydrolase 4 isoform a [Rattus norvegicus]	3	6	6	6	4	2	2	2	2	3	1	1	1	4	2	2	2	2	3	1	1	1	4	2	2	2	2	3	1	1	1	10.8	10.8	10.8	103.71	914	914;961;921	1	18	0	28.753	8.1	4	4
NP_001099572.1	NP_001099572.1	2	2	2	NP_001099572.1 HIG1 domain family member 2A, mitochondrial [Rattus norvegicus]	1	2	2	2	2	0	0	0	1	1	1	2	2	2	0	0	0	1	1	1	2	2	2	0	0	0	1	1	1	2	2	33	33	33	11.43	106	106	1	9	0	37.456	33	0	0
NP_001099576.1	NP_001099576.1	5	5	5	NP_001099576.1 eukaryotic translation elongation factor 1 epsilon-1 [Rattus norvegicus]	1	5	5	5	2	4	3	3	1	1	3	3	3	2	4	3	3	1	1	3	3	3	2	4	3	3	1	1	3	3	3	35.1	35.1	35.1	19.842	174	174	1	24	0	12.301	20.1	29.3	25.3
NP_001099581.1	NP_001099581.1	3	3	3	NP_001099581.1 acyl-coenzyme A thioesterase 13 [Rattus norvegicus]	1	3	3	3	1	2	1	2	2	2	2	1	2	1	2	1	2	2	2	2	1	2	1	2	1	2	2	2	2	1	2	21.4	21.4	21.4	15.27	140	140	1	16	0	11.63	8.6	14.3	8.6
NP_001099583.1	NP_001099583.1	9	6	6	NP_001099583.1 histone H1.1 [Rattus norvegicus]	1	9	6	6	9	7	8	9	6	8	7	7	8	6	5	5	6	4	5	5	4	5	6	5	5	6	4	5	5	4	5	36.9	29	29	22.004	214	214	1	90	0	112.82	36.9	32.2	32.7
NP_001099586.1	NP_001099586.1	2	2	2	NP_001099586.1 39S ribosomal protein L32, mitochondrial precursor [Rattus norvegicus]	1	2	2	2	1	0	0	0	0	1	0	1	1	1	0	0	0	0	1	0	1	1	1	0	0	0	0	1	0	1	1	16	16	16	21.601	187	187	1	4	0.00019073	2.7836	9.6	0	0
NP_001099588.1	NP_001099588.1	4	1	1	NP_001099588.1 tubulin alpha chain-like 3 [Rattus norvegicus]	1	4	1	1	3	3	4	1	3	2	1	4	3	0	1	1	0	1	1	0	1	1	0	1	1	0	1	1	0	1	1	9.7	4.5	4.5	42.832	382	382	1	6	0	6.272	5.2	7.3	9.7
NP_001099593.2	NP_001099593.2	15	15	15	NP_001099593.2 macrophage mannose receptor 1 precursor [Rattus norvegicus]	1	15	15	15	5	8	5	3	3	3	4	2	6	5	8	5	3	3	3	4	2	6	5	8	5	3	3	3	4	2	6	13.1	13.1	13.1	164.99	1456	1456	1	42	0	42.254	4.5	8.1	4.2
NP_001099597.1;XP_008770082.1	NP_001099597.1;XP_008770082.1	2;2	1;1	1;1	NP_001099597.1 phosphoribosyltransferase domain-containing protein 1 [Rattus norvegicus];XP_008770082.1 PREDICTED: phosphoribosyltransferase domain-containing protein 1 isoform X1 [Rattus norvegicus]	2	2	1	1	0	0	0	0	2	2	1	0	1	0	0	0	0	1	1	0	0	0	0	0	0	0	1	1	0	0	0	8.9	5.8	5.8	25.557	225	225;262	1	2	0.0096705	0.93978	0	0	0
NP_001099599.1	NP_001099599.1	6	6	6	NP_001099599.1 zinc-binding alcohol dehydrogenase domain-containing protein 2 [Rattus norvegicus]	1	6	6	6	4	3	2	3	3	2	1	1	3	4	3	2	3	3	2	1	1	3	4	3	2	3	3	2	1	1	3	20.7	20.7	20.7	40.475	377	377	1	23	0	17.848	15.1	10.3	6.4
NP_001099608.2;XP_008770339.1	NP_001099608.2;XP_008770339.1	3;2	3;2	3;2	NP_001099608.2 proteasome assembly chaperone 2 [Rattus norvegicus];XP_008770339.1 PREDICTED: proteasome assembly chaperone 2 isoform X1 [Rattus norvegicus]	2	3	3	3	1	1	1	1	2	1	2	2	1	1	1	1	1	2	1	2	2	1	1	1	1	1	2	1	2	2	1	12.5	12.5	12.5	29.653	264	264;245	1	12	0	8.5586	4.5	4.5	4.5
NP_001099615.1;XP_008772039.1;XP_003751836.2	NP_001099615.1;XP_008772039.1;XP_003751836.2	6;4;4	6;4;4	6;4;4	NP_001099615.1 long-chain fatty acid transport protein 6 [Rattus norvegicus];XP_008772039.1 PREDICTED: long-chain fatty acid transport protein 6-like [Rattus norvegicus];XP_003751836.2 PREDICTED: long-chain fatty acid transport protein 6-like [Rattus norve	3	6	6	6	2	2	2	1	4	3	3	3	2	2	2	2	1	4	3	3	3	2	2	2	2	1	4	3	3	3	2	12.1	12.1	12.1	70.626	619	619;280;280	1	28	0	16.786	4.5	4.5	4.5
NP_001099623.1	NP_001099623.1	5	5	5	NP_001099623.1 NADH dehydrogenase [ubiquinone] 1 alpha subcomplex subunit 2 [Rattus norvegicus]	1	5	5	5	4	2	2	3	4	4	4	4	3	4	2	2	3	4	4	4	4	3	4	2	2	3	4	4	4	4	3	42.3	42.3	42.3	10.844	97	97	1	39	0	13.891	33	11.3	11.3
NP_001099627.1	NP_001099627.1	1	1	1	NP_001099627.1 signal recognition particle 19 kDa protein [Rattus norvegicus]	1	1	1	1	1	1	0	0	1	1	1	0	0	1	1	0	0	1	1	1	0	0	1	1	0	0	1	1	1	0	0	8.3	8.3	8.3	16.138	144	144	1	5	0.00071098	1.8782	8.3	8.3	0
NP_001099629.1;XP_017456407.1	NP_001099629.1;XP_017456407.1	5;3	5;3	5;3	NP_001099629.1 stAR-related lipid transfer protein 4 [Rattus norvegicus];XP_017456407.1 PREDICTED: stAR-related lipid transfer protein 4 isoform X1 [Rattus norvegicus]	2	5	5	5	0	2	2	1	2	2	1	2	1	0	2	2	1	2	2	1	2	1	0	2	2	1	2	2	1	2	1	37.1	37.1	37.1	25.544	224	224;170	1	13	0	7.5892	0	16.1	16.1
NP_001099633.1;XP_008770165.1	NP_001099633.1	5;1	5;1	5;1	NP_001099633.1 small nuclear ribonucleoprotein Sm D1 [Rattus norvegicus]	2	5	5	5	4	5	5	3	5	5	2	5	5	4	5	5	3	5	5	2	5	5	4	5	5	3	5	5	2	5	5	54.6	54.6	54.6	13.281	119	119;78	1	59	0	57.992	54.6	54.6	54.6
NP_001099641.1;XP_006255251.1;XP_006255249.1;NP_775446.2;XP_017447283.1;XP_006235640.1;NP_955424.2;XP_017448956.1;XP_006237906.1;NP_001102124.1;XP_017448955.1	NP_001099641.1;XP_006255251.1;XP_006255249.1;NP_775446.2;XP_017447283.1;XP_006235640.1;NP_955424.2;XP_017448956.1;XP_006237906.1;NP_001102124.1;XP_017448955.1	2;2;2;2;1;1;1;1;1;1;1	2;2;2;2;1;1;1;1;1;1;1	1;1;1;1;0;0;0;1;1;1;1	NP_001099641.1 TOX high mobility group box family member 3 [Rattus norvegicus];XP_006255251.1 PREDICTED: TOX high mobility group box family member 3 isoform X2 [Rattus norvegicus];XP_006255249.1 PREDICTED: TOX high mobility group box family member 3 isofor	11	2	2	1	1	0	1	1	2	1	0	2	2	1	0	1	1	2	1	0	2	2	0	0	0	0	1	1	0	1	1	5	5	2.4	59.816	543	543;578;579;619;473;505;515;525;525;525;527	1	10	0	8.5763	2.6	0	2.6
NP_001099645.1;XP_006255510.1;XP_017445896.1;XP_001056053.3;NP_001094469.1;XP_008770746.1;XP_017443423.1;NP_001093947.1;NP_001037723.1;NP_001258232.1;NP_001177298.1;XP_008770745.1;NP_001177275.1	NP_001099645.1;XP_006255510.1;XP_017445896.1;XP_001056053.3;NP_001094469.1	6;5;3;3;3;2;2;2;2;2;2;2;1	5;4;2;2;2;1;1;1;1;1;1;1;1	4;3;1;1;1;1;1;0;1;0;0;1;1	NP_001099645.1 carboxylesterase 2G precursor [Rattus norvegicus];XP_006255510.1 PREDICTED: carboxylesterase 2G isoform X1 [Rattus norvegicus];XP_017445896.1 PREDICTED: LOW QUALITY PROTEIN: pyrethroid hydrolase Ces2e-like [Rattus norvegicus];XP_001056053.3	13	6	5	4	1	2	0	2	1	1	2	3	2	1	2	0	1	1	1	1	3	2	0	2	0	1	0	0	0	2	1	12.9	11.6	9.3	62.909	560	560;458;557;559;561;524;543;557;558;561;561;570;447	1	13	0	5.2349	2.3	4.6	0
NP_001099652.1	NP_001099652.1	9	9	9	NP_001099652.1 conserved oligomeric Golgi complex subunit 8 [Rattus norvegicus]	1	9	9	9	3	4	3	1	3	2	1	2	3	3	4	3	1	3	2	1	2	3	3	4	3	1	3	2	1	2	3	21	21	21	70.761	634	634	1	25	0	49.115	10.6	12.1	9.9
NP_001099663.1;XP_017457012.1;XP_017456735.1;XP_017449450.1;XP_017447851.1;XP_003754762.2	NP_001099663.1;XP_017457012.1;XP_017456735.1;XP_017449450.1;XP_017447851.1;XP_003754762.2	2;1;1;1;1;1	2;1;1;1;1;1	2;1;1;1;1;1	NP_001099663.1 trafficking protein particle complex subunit 2-like protein [Rattus norvegicus];XP_017457012.1 PREDICTED: trafficking protein particle complex subunit 2-like protein isoform X1 [Rattus norvegicus];XP_017456735.1 PREDICTED: trafficking protei	6	2	2	2	1	1	1	1	1	1	2	1	1	1	1	1	1	1	1	2	1	1	1	1	1	1	1	1	2	1	1	15.1	15.1	15.1	16.031	139	139;109;109;109;109;109	1	10	0.0001998	3.5141	9.4	5.8	9.4
NP_001099666.1;XP_008770827.1	NP_001099666.1;XP_008770827.1	5;5	5;5	5;5	NP_001099666.1 polypeptide N-acetylgalactosaminyltransferase 2 [Rattus norvegicus];XP_008770827.1 PREDICTED: polypeptide N-acetylgalactosaminyltransferase 2 isoform X1 [Rattus norvegicus]	2	5	5	5	2	0	2	1	2	3	0	0	1	2	0	2	1	2	3	0	0	1	2	0	2	1	2	3	0	0	1	14.6	14.6	14.6	53.783	473	473;504	1	11	0	15.607	5.9	0	7.6
NP_001099675.1;XP_017444357.1	NP_001099675.1;XP_017444357.1	3;2	3;2	3;2	NP_001099675.1 39S ribosomal protein L18, mitochondrial [Rattus norvegicus];XP_017444357.1 PREDICTED: 39S ribosomal protein L18, mitochondrial isoform X1 [Rattus norvegicus]	2	3	3	3	3	2	2	1	1	1	0	3	2	3	2	2	1	1	1	0	3	2	3	2	2	1	1	1	0	3	2	17.2	17.2	17.2	20.65	180	180;129	1	15	0	6.756	17.2	12.2	12.2
NP_001099678.1	NP_001099678.1	12	1	1	NP_001099678.1 poly(A) binding protein, cytoplasmic 6 [Rattus norvegicus]	1	12	1	1	8	9	7	10	9	8	9	7	9	1	0	0	0	0	0	0	0	0	1	0	0	0	0	0	0	0	0	18.4	4.7	4.7	71.028	643	643	1	1	0	6.1447	15.6	13.4	10.4
NP_001099680.1	NP_001099680.1	3	3	3	NP_001099680.1 ribonuclease T2 precursor [Rattus norvegicus]	1	3	3	3	1	1	2	2	2	2	2	2	1	1	1	2	2	2	2	2	2	1	1	1	2	2	2	2	2	2	1	16	16	16	29.516	256	256	1	21	0	44.402	6.2	6.2	12.1
NP_001099689.1	NP_001099689.1	10	10	10	NP_001099689.1 U4/U6 small nuclear ribonucleoprotein Prp31 [Rattus norvegicus]	1	10	10	10	3	3	6	3	4	4	4	4	6	3	3	6	3	4	4	4	4	6	3	3	6	3	4	4	4	4	6	27.9	27.9	27.9	55.415	499	499	1	41	0	29.829	8.6	9.8	16.2
NP_001099700.1	NP_001099700.1	1	1	1	NP_001099700.1 glutaminyl-peptide cyclotransferase-like protein [Rattus norvegicus]	1	1	1	1	0	1	0	0	0	1	0	0	0	0	1	0	0	0	1	0	0	0	0	1	0	0	0	1	0	0	0	8.4	8.4	8.4	42.617	383	383	1	2	0	3.8895	0	8.4	0
NP_001099702.1	NP_001099702.1	6	6	6	NP_001099702.1 cleft lip and palate transmembrane protein 1 [Rattus norvegicus]	1	6	6	6	1	2	2	1	2	3	3	5	5	1	2	2	1	2	3	3	5	5	1	2	2	1	2	3	3	5	5	10.7	10.7	10.7	75.276	664	664	1	26	0	37.434	2.3	3.8	4.8
NP_001099704.1	NP_001099704.1	5	5	5	NP_001099704.1 persulfide dioxygenase ETHE1, mitochondrial [Rattus norvegicus]	1	5	5	5	5	5	4	5	4	4	4	4	4	5	5	4	5	4	4	4	4	4	5	5	4	5	4	4	4	4	4	31.1	31.1	31.1	27.676	254	254	1	109	0	268.12	31.1	31.1	27.6
NP_001099706.1;XP_008757339.1	NP_001099706.1;XP_008757339.1	10;5	10;5	10;5	NP_001099706.1 flavin reductase (NADPH) [Rattus norvegicus];XP_008757339.1 PREDICTED: flavin reductase (NADPH) isoform X1 [Rattus norvegicus]	2	10	10	10	6	6	4	7	9	8	7	7	8	6	6	4	7	9	8	7	7	8	6	6	4	7	9	8	7	7	8	70.9	70.9	70.9	22.094	206	206;120	1	90	0	323.31	46.1	46.6	38.3
NP_001099710.1	NP_001099710.1	8	8	8	NP_001099710.1 serine--tRNA ligase, mitochondrial [Rattus norvegicus]	1	8	8	8	2	4	3	4	4	2	3	1	2	2	4	3	4	4	2	3	1	2	2	4	3	4	4	2	3	1	2	24.9	24.9	24.9	58.286	518	518	1	33	0	65.212	5.8	12.7	9.1
NP_001099728.1	NP_001099728.1	3	3	3	NP_001099728.1 TBC1 domain family member 17 [Rattus norvegicus]	1	3	3	3	1	1	1	0	1	1	0	0	1	1	1	1	0	1	1	0	0	1	1	1	1	0	1	1	0	0	1	5	5	5	72.795	646	646	1	6	0	5.4159	1.7	1.4	1.4
NP_001099729.2;XP_006229067.1;XP_006229066.1;XP_008757557.1	NP_001099729.2;XP_006229067.1;XP_006229066.1;XP_008757557.1	4;3;3;2	4;3;3;2	1;0;0;0	NP_001099729.2 proline-rich AKT1 substrate 1 [Rattus norvegicus];XP_006229067.1 PREDICTED: proline-rich AKT1 substrate 1 isoform X3 [Rattus norvegicus];XP_006229066.1 PREDICTED: proline-rich AKT1 substrate 1 isoform X2 [Rattus norvegicus];XP_008757557.1 PR	4	4	4	1	2	3	2	1	2	3	2	3	2	2	3	2	1	2	3	2	3	2	0	1	0	0	0	1	0	1	1	24.1	24.1	7	27.586	257	257;264;272;171	1	22	0	42.995	12.1	19.1	12.1
NP_001099734.1	NP_001099734.1	1	1	1	NP_001099734.1 ralBP1-associated Eps domain-containing protein 1 [Rattus norvegicus]	1	1	1	1	0	0	0	0	0	0	0	1	0	0	0	0	0	0	0	0	1	0	0	0	0	0	0	0	0	1	0	2	2	2	66.686	615	615	1	1	0.0064946	1.1107	0	0	0
NP_001099740.2	NP_001099740.2	5	1	1	NP_001099740.2 ensconsin isoform 1 [Rattus norvegicus]	1	5	1	1	1	0	2	1	0	2	1	3	2	0	0	0	1	0	0	1	1	1	0	0	0	1	0	0	1	1	1	9.6	1.5	1.5	84.73	751	751	1	4	0.00037362	2.5491	1.7	0	5.5
NP_001099741.2	NP_001099741.2	6	6	6	NP_001099741.2 A-kinase anchor protein 13 [Rattus norvegicus]	1	6	6	6	2	0	0	0	1	1	0	1	2	2	0	0	0	1	1	0	1	2	2	0	0	0	1	1	0	1	2	3	3	3	301.4	2760	2760	1	7	0	4.4197	1.2	0	0
NP_001099748.1;XP_006229726.1	NP_001099748.1;XP_006229726.1	4;3	4;3	4;3	NP_001099748.1 polycomb protein EED [Rattus norvegicus];XP_006229726.1 PREDICTED: polycomb protein EED isoform X1 [Rattus norvegicus]	2	4	4	4	1	0	0	0	1	1	1	2	1	1	0	0	0	1	1	1	2	1	1	0	0	0	1	1	1	2	1	11.3	11.3	11.3	50.197	441	441;367	1	7	0.00019897	3.4539	3.4	0	0
NP_001099751.2	NP_001099751.2	5	5	5	NP_001099751.2 lysosomal Pro-X carboxypeptidase precursor [Rattus norvegicus]	1	5	5	5	2	3	3	5	5	3	5	3	3	2	3	3	5	5	3	5	3	3	2	3	3	5	5	3	5	3	3	15.4	15.4	15.4	55.562	493	493	1	40	0	28.697	8.7	11.6	11.6
NP_001099752.1	NP_001099752.1	3	3	3	NP_001099752.1 39S ribosomal protein L48, mitochondrial [Rattus norvegicus]	1	3	3	3	0	1	1	2	2	1	2	2	1	0	1	1	2	2	1	2	2	1	0	1	1	2	2	1	2	2	1	15.6	15.6	15.6	24.019	211	211	1	15	0	5.347	0	5.2	5.2
NP_001099756.1	NP_001099756.1	2	2	2	NP_001099756.1 lymphatic vessel endothelial hyaluronic acid receptor 1 [Rattus norvegicus]	1	2	2	2	1	1	1	1	0	1	0	0	0	1	1	1	1	0	1	0	0	0	1	1	1	1	0	1	0	0	0	6.1	6.1	6.1	37.267	343	343	1	5	0.00054665	2.2296	2.6	3.5	3.5
NP_001099758.1;XP_017444475.1	NP_001099758.1;XP_017444475.1	21;19	21;19	21;19	NP_001099758.1 switch-associated protein 70 [Rattus norvegicus];XP_017444475.1 PREDICTED: switch-associated protein 70 isoform X1 [Rattus norvegicus]	2	21	21	21	5	10	6	4	9	9	9	10	10	5	10	6	4	9	9	9	10	10	5	10	6	4	9	9	9	10	10	39.7	39.7	39.7	68.773	585	585;549	1	84	0	217.4	13.7	26.3	17.8
NP_001099760.1;XP_017457178.1;XP_017447742.1;XP_017446056.1;XP_017446030.1;XP_017459106.1;XP_017451517.1;XP_218078.3;XP_001069244.1;XP_017444101.1;XP_008772214.1;XP_008770013.1;XP_017445971.1	NP_001099760.1;XP_017457178.1;XP_017447742.1;XP_017446056.1;XP_017446030.1;XP_017459106.1;XP_017451517.1;XP_218078.3;XP_001069244.1	4;2;2;2;2;2;2;2;2;1;1;1;1	4;2;2;2;2;2;2;2;2;1;1;1;1	4;2;2;2;2;2;2;2;2;1;1;1;1	NP_001099760.1 60S ribosomal protein L27a [Rattus norvegicus];XP_017457178.1 PREDICTED: 60S ribosomal protein L27a-like [Rattus norvegicus];XP_017447742.1 PREDICTED: 60S ribosomal protein L27a-like [Rattus norvegicus];XP_017446056.1 PREDICTED: 60S ribosoma	13	4	4	4	3	2	2	3	2	3	2	1	2	3	2	2	3	2	3	2	1	2	3	2	2	3	2	3	2	1	2	23	23	23	16.618	148	148;130;130;132;132;148;148;148;148;122;134;134;301	1	23	0	8.0561	15.5	15.5	14.2
NP_001099765.1;XP_006230287.1;XP_006230286.1	NP_001099765.1;XP_006230287.1;XP_006230286.1	20;18;18	20;18;18	20;18;18	NP_001099765.1 elongation factor Tu, mitochondrial precursor [Rattus norvegicus];XP_006230287.1 PREDICTED: elongation factor Tu, mitochondrial isoform X2 [Rattus norvegicus];XP_006230286.1 PREDICTED: elongation factor Tu, mitochondrial isoform X1 [Rattus n	3	20	20	20	15	14	12	15	14	15	15	15	17	15	14	12	15	14	15	15	15	17	15	14	12	15	14	15	15	15	17	51.3	51.3	51.3	49.522	452	452;412;424	1	208	0	240.83	41.4	38.9	33.4
NP_001099770.1;XP_017445725.1	NP_001099770.1	6;2	6;2	6;2	NP_001099770.1 arginyl-tRNA--protein transferase 1 [Rattus norvegicus]	2	6	6	6	4	3	2	1	1	4	3	1	2	4	3	2	1	1	4	3	1	2	4	3	2	1	1	4	3	1	2	15.1	15.1	15.1	58.216	509	509;113	1	25	0	134.48	10.6	9.8	6.5
NP_001099777.2	NP_001099777.2	7	7	7	NP_001099777.2 BRISC complex subunit Abro1 [Rattus norvegicus]	1	7	7	7	3	2	1	4	2	2	1	2	3	3	2	1	4	2	2	1	2	3	3	2	1	4	2	2	1	2	3	19.6	19.6	19.6	47.804	423	423	1	20	0	43.978	9	7.3	4
NP_001099789.1;XP_006230775.1	NP_001099789.1;XP_006230775.1	21;21	21;21	21;21	NP_001099789.1 cysteine--tRNA ligase, cytoplasmic [Rattus norvegicus];XP_006230775.1 PREDICTED: cysteine--tRNA ligase, cytoplasmic isoform X1 [Rattus norvegicus]	2	21	21	21	11	8	8	7	9	8	9	10	10	11	8	8	7	9	8	9	10	10	11	8	8	7	9	8	9	10	10	35.6	35.6	35.6	85.593	748	748;831	1	90	0	167.97	22.9	18.3	14.8
NP_001099793.1	NP_001099793.1	1	1	1	NP_001099793.1 rho-related GTP-binding protein RhoD [Rattus norvegicus]	1	1	1	1	0	0	1	0	0	0	0	0	0	0	0	1	0	0	0	0	0	0	0	0	1	0	0	0	0	0	0	9	9	9	23.682	210	210	1	1	0.00018972	2.7303	0	0	9
NP_001099800.1	NP_001099800.1	4	4	4	NP_001099800.1 multifunctional methyltransferase subunit TRM112-like protein [Rattus norvegicus]	1	4	4	4	3	3	3	2	2	1	1	2	1	3	3	3	2	2	1	1	2	1	3	3	3	2	2	1	1	2	1	47.2	47.2	47.2	14.127	125	125	1	27	0	61.103	37.6	47.2	47.2
NP_001099802.1	NP_001099802.1	9	9	9	NP_001099802.1 ubiquitin thioesterase OTUB1 [Rattus norvegicus]	1	9	9	9	6	6	8	8	9	8	7	8	6	6	6	8	8	9	8	7	8	6	6	6	8	8	9	8	7	8	6	39.1	39.1	39.1	31.27	271	271	1	89	0	99.235	23.2	24.4	35.4
NP_001099810.1	NP_001099810.1	4	4	4	NP_001099810.1 U3 small nucleolar ribonucleoprotein protein MPP10 [Rattus norvegicus]	1	4	4	4	0	2	0	0	0	0	1	2	2	0	2	0	0	0	0	1	2	2	0	2	0	0	0	0	1	2	2	12.3	12.3	12.3	77.827	676	676	1	8	0	8.2983	0	4.7	0
NP_001099811.1;XP_017444518.1;XP_017444519.1	NP_001099811.1;XP_017444518.1;XP_017444519.1	4;4;3	4;4;3	4;4;3	NP_001099811.1 methylmalonyl-CoA epimerase, mitochondrial [Rattus norvegicus];XP_017444518.1 PREDICTED: methylmalonyl-CoA epimerase, mitochondrial isoform X1 [Rattus norvegicus];XP_017444519.1 PREDICTED: methylmalonyl-CoA epimerase, mitochondrial isoform X	3	4	4	4	3	3	3	4	4	4	4	4	4	3	3	3	4	4	4	4	4	4	3	3	3	4	4	4	4	4	4	42.1	42.1	42.1	18.816	178	178;190;179	1	58	0	193.58	34.3	34.3	34.3
NP_001099815.1	NP_001099815.1	2	2	2	NP_001099815.1 EKC/KEOPS complex subunit LAGE3 [Rattus norvegicus]	1	2	2	2	1	1	1	0	1	1	1	1	1	1	1	1	0	1	1	1	1	1	1	1	1	0	1	1	1	1	1	22.3	22.3	22.3	15.667	148	148	1	8	0	16.836	14.2	14.2	14.2
NP_001099816.1	NP_001099816.1	7	7	7	NP_001099816.1 ubiquitin-like protein 4A [Rattus norvegicus]	1	7	7	7	4	4	2	4	4	4	3	3	3	4	4	2	4	4	4	3	3	3	4	4	2	4	4	4	3	3	3	47.8	47.8	47.8	17.79	157	157	1	39	0	36.81	28.7	31.2	17.2
NP_001099830.1	NP_001099830.1	5	5	5	NP_001099830.1 NADH dehydrogenase [ubiquinone] 1 beta subcomplex subunit 8, mitochondrial [Rattus norvegicus]	1	5	5	5	5	5	4	3	5	4	2	4	4	5	5	4	3	5	4	2	4	4	5	5	4	3	5	4	2	4	4	38.2	38.2	38.2	21.959	186	186	1	45	0	56.724	38.2	38.2	31.7
NP_001099834.1;XP_006231532.1	NP_001099834.1;XP_006231532.1	14;14	14;14	6;6	NP_001099834.1 alpha-centractin [Rattus norvegicus];XP_006231532.1 PREDICTED: alpha-centractin isoform X1 [Rattus norvegicus]	2	14	14	6	9	9	10	12	8	10	9	11	7	9	9	10	12	8	10	9	11	7	4	4	4	4	5	5	5	6	5	48.7	48.7	22.9	42.613	376	376;396	1	131	0	323.31	39.4	40.2	42
NP_001099842.1;XP_008758589.1	NP_001099842.1;XP_008758589.1	2;2	2;2	2;2	NP_001099842.1 E3 ubiquitin-protein ligase MARCH5 [Rattus norvegicus];XP_008758589.1 PREDICTED: E3 ubiquitin-protein ligase MARCH5 isoform X1 [Rattus norvegicus]	2	2	2	2	1	1	0	0	0	0	1	1	1	1	1	0	0	0	0	1	1	1	1	1	0	0	0	0	1	1	1	9.7	9.7	9.7	31.231	278	278;293	1	5	0	5.3918	5.8	4	0
NP_001099850.1	NP_001099850.1	1	1	1	NP_001099850.1 ubiquitin-conjugating enzyme E2 G2 [Rattus norvegicus]	1	1	1	1	1	0	0	0	1	0	0	1	1	1	0	0	0	1	0	0	1	1	1	0	0	0	1	0	0	1	1	14.5	14.5	14.5	18.566	165	165	1	4	0.00019331	2.988	14.5	0	0
NP_001099851.1;XP_006256400.1	NP_001099851.1;XP_006256400.1	10;10	10;10	10;10	NP_001099851.1 sushi domain-containing protein 2 precursor [Rattus norvegicus];XP_006256400.1 PREDICTED: sushi domain-containing protein 2 isoform X1 [Rattus norvegicus]	2	10	10	10	7	6	5	3	9	8	5	6	7	7	6	5	3	9	8	5	6	7	7	6	5	3	9	8	5	6	7	15	15	15	89.67	820	820;825	1	81	0	239.45	12.8	11.7	10.7
NP_001099856.2;XP_017457108.1	NP_001099856.2;XP_017457108.1	2;2	2;2	2;2	NP_001099856.2 receptor expression-enhancing protein 3 [Rattus norvegicus];XP_017457108.1 PREDICTED: receptor expression-enhancing protein 3 isoform X1 [Rattus norvegicus]	2	2	2	2	0	1	0	1	1	0	0	2	1	0	1	0	1	1	0	0	2	1	0	1	0	1	1	0	0	2	1	7.5	7.5	7.5	29.199	254	254;377	1	6	0.00019327	2.9868	0	3.5	0
NP_001099859.1	NP_001099859.1	2	2	2	NP_001099859.1 histone chaperone ASF1A [Rattus norvegicus]	1	2	2	2	1	0	1	0	0	0	0	0	1	1	0	1	0	0	0	0	0	1	1	0	1	0	0	0	0	0	1	21.1	21.1	21.1	22.9	204	204	1	3	0.00019482	3.1135	13.7	0	7.4
NP_001099861.1	NP_001099861.1	1	1	1	NP_001099861.1 ribosome production factor 2 homolog [Rattus norvegicus]	1	1	1	1	0	0	0	0	1	0	0	0	0	0	0	0	0	1	0	0	0	0	0	0	0	0	1	0	0	0	0	4.9	4.9	4.9	35.256	306	306	1	1	0.00018836	2.6455	0	0	0
NP_001099867.1	NP_001099867.1	15	15	15	NP_001099867.1 [F-actin]-monooxygenase MICAL1 [Rattus norvegicus]	1	15	15	15	4	2	1	3	6	3	2	8	5	4	2	1	3	6	3	2	8	5	4	2	1	3	6	3	2	8	5	17.6	17.6	17.6	116.67	1047	1047	1	35	0	33.088	6.2	2.8	1.4
NP_001099874.1	NP_001099874.1	1	1	1	NP_001099874.1 zinc transporter 5 [Rattus norvegicus]	1	1	1	1	0	0	0	0	0	1	0	0	0	0	0	0	0	0	1	0	0	0	0	0	0	0	0	1	0	0	0	1.3	1.3	1.3	83.664	760	760	1	1	0.00037202	2.5142	0	0	0
NP_001099879.1	NP_001099879.1	14	4	4	NP_001099879.1 beta-actin-like protein 2 [Rattus norvegicus]	1	14	4	4	8	13	8	7	11	7	7	8	8	1	4	2	1	2	0	1	1	1	1	4	2	1	2	0	1	1	1	30.6	13.8	13.8	41.963	376	376	1	22	0	25.557	18.1	30.6	21
NP_001099881.1;XP_017446856.1	NP_001099881.1;XP_017446856.1	3;2	3;2	3;2	NP_001099881.1 probable glutathione peroxidase 8 [Rattus norvegicus];XP_017446856.1 PREDICTED: glutathione peroxidase-like [Rattus norvegicus]	2	3	3	3	2	1	0	3	1	0	1	1	0	2	1	0	3	1	0	1	1	0	2	1	0	3	1	0	1	1	0	15.8	15.8	15.8	24.143	209	209;186	1	9	0.00054695	2.2354	10.5	5.3	0
NP_001099882.1;XP_006232019.1	NP_001099882.1;XP_006232019.1	6;6	6;6	6;6	NP_001099882.1 28S ribosomal protein S30, mitochondrial [Rattus norvegicus];XP_006232019.1 PREDICTED: 28S ribosomal protein S30, mitochondrial isoform X1 [Rattus norvegicus]	2	6	6	6	3	3	4	3	3	4	0	2	3	3	3	4	3	3	4	0	2	3	3	3	4	3	3	4	0	2	3	23	23	23	50.001	440	440;467	1	25	0	61.788	10.7	10.7	16.4
NP_001099883.1;XP_017446206.1;XP_008758983.1	NP_001099883.1;XP_017446206.1;XP_008758983.1	4;4;4	4;4;4	4;4;4	NP_001099883.1 caspase recruitment domain-containing protein 6 [Rattus norvegicus];XP_017446206.1 PREDICTED: caspase recruitment domain-containing protein 6 isoform X1 [Rattus norvegicus];XP_008758983.1 PREDICTED: caspase recruitment domain-containing prot	3	4	4	4	2	0	0	0	1	2	0	2	2	2	0	0	0	1	2	0	2	2	2	0	0	0	1	2	0	2	2	6	6	6	122.06	1098	1098;1126;1126	1	9	0	9.1932	3.3	0	0
NP_001099891.1;XP_008759084.1;XP_006232205.1;XP_006232204.1;XP_006232203.1;XP_006232202.1	NP_001099891.1;XP_008759084.1;XP_006232205.1;XP_006232204.1;XP_006232203.1;XP_006232202.1	10;10;10;10;10;10	1;1;1;1;1;1	1;1;1;1;1;1	NP_001099891.1 tumor protein D52 [Rattus norvegicus];XP_008759084.1 PREDICTED: tumor protein D52 isoform X5 [Rattus norvegicus];XP_006232205.1 PREDICTED: tumor protein D52 isoform X4 [Rattus norvegicus];XP_006232204.1 PREDICTED: tumor protein D52 isoform X	6	10	1	1	9	7	8	7	9	9	7	9	9	1	1	1	0	1	1	0	1	1	1	1	1	0	1	1	0	1	1	48.7	13.8	13.8	24.269	224	224;238;247;323;337;346	1	14	0	58.278	48.7	38.8	43.3
NP_001099896.1	NP_001099896.1	5	5	5	NP_001099896.1 NADH dehydrogenase [ubiquinone] 1 beta subcomplex subunit 5, mitochondrial [Rattus norvegicus]	1	5	5	5	4	4	2	3	5	4	3	5	5	4	4	2	3	5	4	3	5	5	4	4	2	3	5	4	3	5	5	28	28	28	21.664	189	189	1	39	0	20.815	23.8	23.8	12.7
NP_001099898.2;XP_006232359.1	NP_001099898.2;XP_006232359.1	14;14	12;12	12;12	NP_001099898.2 heat shock 70 kDa protein 4L [Rattus norvegicus];XP_006232359.1 PREDICTED: heat shock 70 kDa protein 4L isoform X1 [Rattus norvegicus]	2	14	12	12	6	6	6	4	8	7	3	6	4	5	5	5	2	6	5	1	5	3	5	5	5	2	6	5	1	5	3	24.3	21.4	21.4	94.22	838	838;1017	1	41	0	82.556	11.1	10.9	10.9
NP_001099900.1	NP_001099900.1	3	3	3	NP_001099900.1 microsomal glutathione S-transferase 2 [Rattus norvegicus]	1	3	3	3	3	2	1	2	2	2	3	2	1	3	2	1	2	2	2	3	2	1	3	2	1	2	2	2	3	2	1	25.2	25.2	25.2	16.705	147	147	1	25	0	4.9323	25.2	17.7	9.5
NP_001099910.1;XP_006232671.1	NP_001099910.1;XP_006232671.1	4;4	4;4	4;4	NP_001099910.1 NAD(P)H-hydrate epimerase [Rattus norvegicus];XP_006232671.1 PREDICTED: NAD(P)H-hydrate epimerase isoform X1 [Rattus norvegicus]	2	4	4	4	3	3	3	3	3	3	2	2	1	3	3	3	3	3	3	2	2	1	3	3	3	3	3	3	2	2	1	33.2	33.2	33.2	22.396	205	205;282	1	36	0	20.714	29.3	18.5	18.5
NP_001099911.1;XP_008759356.1	NP_001099911.1;XP_008759356.1	4;4	4;4	4;4	NP_001099911.1 ragulator complex protein LAMTOR2 [Rattus norvegicus];XP_008759356.1 PREDICTED: ragulator complex protein LAMTOR2 isoform X1 [Rattus norvegicus]	2	4	4	4	1	2	2	3	2	1	1	3	2	1	2	2	3	2	1	1	3	2	1	2	2	3	2	1	1	3	2	43.2	43.2	43.2	13.48	125	125;151	1	17	0	38.982	12	26.4	26.4
NP_001099914.1	NP_001099914.1	1	1	1	NP_001099914.1 keratinocyte-associated protein 2 [Rattus norvegicus]	1	1	1	1	0	1	1	0	0	0	0	0	0	0	1	1	0	0	0	0	0	0	0	1	1	0	0	0	0	0	0	14.9	14.9	14.9	12.53	114	114	1	2	0.00018954	2.7187	0	14.9	14.9
NP_001099915.1	NP_001099915.1	2	2	2	NP_001099915.1 sugar transporter SWEET1 [Rattus norvegicus]	1	2	2	2	2	1	0	1	0	1	1	0	0	2	1	0	1	0	1	1	0	0	2	1	0	1	0	1	1	0	0	9	9	9	24.694	221	221	1	8	0	8.0648	9	8.1	0
NP_001099918.1	NP_001099918.1	2	2	2	NP_001099918.1 ubiquitin-conjugating enzyme E2 Q1 [Rattus norvegicus]	1	2	2	2	1	1	0	1	1	0	1	1	0	1	1	0	1	1	0	1	1	0	1	1	0	1	1	0	1	1	0	5.5	5.5	5.5	46.172	422	422	1	6	0.0043801	1.2441	1.9	1.9	0
NP_001099922.1	NP_001099922.1	3	3	3	NP_001099922.1 mannosyl-oligosaccharide 1,2-alpha-mannosidase IB [Rattus norvegicus]	1	3	3	3	2	1	0	0	1	2	1	0	0	2	1	0	0	1	2	1	0	0	2	1	0	0	1	2	1	0	0	6.6	6.6	6.6	72.827	641	641	1	7	0	4.702	4.8	2.2	0
NP_001099928.1	NP_001099928.1	9	9	9	NP_001099928.1 pre-mRNA-splicing factor SPF27 [Rattus norvegicus]	1	9	9	9	5	5	4	1	5	3	3	6	2	5	5	4	1	5	3	3	6	2	5	5	4	1	5	3	3	6	2	54.2	54.2	54.2	26.101	225	225	1	40	0	115.35	39.6	34.7	28.9
NP_001099929.1;XP_008759600.1;XP_008759599.1	NP_001099929.1;XP_008759600.1;XP_008759599.1	7;7;7	7;7;7	7;7;7	NP_001099929.1 bcl-2-like protein 15 [Rattus norvegicus];XP_008759600.1 PREDICTED: bcl-2-like protein 15 isoform X1 [Rattus norvegicus];XP_008759599.1 PREDICTED: bcl-2-like protein 15 isoform X1 [Rattus norvegicus]	3	7	7	7	4	5	3	6	5	4	3	3	4	4	5	3	6	5	4	3	3	4	4	5	3	6	5	4	3	3	4	36.1	36.1	36.1	18.18	166	166;188;188	1	42	0	31.099	26.5	36.1	22.3
NP_001099932.1	NP_001099932.1	1	1	1	NP_001099932.1 ragulator complex protein LAMTOR5 [Rattus norvegicus]	1	1	1	1	1	1	1	1	1	1	1	1	1	1	1	1	1	1	1	1	1	1	1	1	1	1	1	1	1	1	1	12.8	12.8	12.8	16.39	156	156	1	16	0	102.37	12.8	12.8	12.8
NP_001099933.1;XP_017458010.1;XP_017452255.1;XP_017446821.1;XP_017458009.1;XP_017452253.1;XP_017446820.1;XP_017458008.1;XP_017452252.1;XP_017452250.1;XP_017446819.1;XP_017446818.1	NP_001099933.1;XP_017458010.1;XP_017452255.1;XP_017446821.1;XP_017458009.1;XP_017452253.1;XP_017446820.1;XP_017458008.1;XP_017452252.1;XP_017452250.1;XP_017446819.1;XP_017446818.1	14;14;14;14;14;14;14;14;14;14;14;14	14;14;14;14;14;14;14;14;14;14;14;14	14;14;14;14;14;14;14;14;14;14;14;14	NP_001099933.1 epidermal growth factor receptor kinase substrate 8-like protein 3 [Rattus norvegicus];XP_017458010.1 PREDICTED: epidermal growth factor receptor kinase substrate 8-like protein 3 isoform X3 [Rattus norvegicus];XP_017452255.1 PREDICTED: epid	12	14	14	14	8	10	8	7	12	8	10	10	11	8	10	8	7	12	8	10	10	11	8	10	8	7	12	8	10	10	11	30.7	30.7	30.7	68.592	600	600;607;607;607;627;627;627;634;634;634;634;634	1	99	0	150.56	20.2	24.3	19.5
NP_001099941.1	NP_001099941.1	15	15	15	NP_001099941.1 bifunctional 3-phosphoadenosine 5-phosphosulfate synthase 1 [Rattus norvegicus]	1	15	15	15	7	7	9	6	11	9	7	12	11	7	7	9	6	11	9	7	12	11	7	7	9	6	11	9	7	12	11	30.5	30.5	30.5	65.902	581	581	1	108	0	105.33	15.8	16.5	20.7
NP_001099946.1	NP_001099946.1	6	6	6	NP_001099946.1 methionine aminopeptidase 1 [Rattus norvegicus]	1	6	6	6	4	2	3	5	3	3	3	4	2	4	2	3	5	3	3	3	4	2	4	2	3	5	3	3	3	4	2	25.1	25.1	25.1	43.205	386	386	1	33	0	23.455	19.7	7.8	15.8
NP_001099948.1;XP_006232239.1;XP_006232238.1;XP_006232237.1	NP_001099948.1;XP_006232239.1;XP_006232238.1;XP_006232237.1	2;2;2;2	2;2;2;2	2;2;2;2	NP_001099948.1 helicase-like transcription factor [Rattus norvegicus];XP_006232239.1 PREDICTED: helicase-like transcription factor isoform X3 [Rattus norvegicus];XP_006232238.1 PREDICTED: helicase-like transcription factor isoform X2 [Rattus norvegicus];XP	4	2	2	2	1	0	0	0	1	0	0	1	1	1	0	0	0	1	0	0	1	1	1	0	0	0	1	0	0	1	1	3.1	3.1	3.1	110.04	974	974;989;1003;1018	1	4	0.00019643	3.2404	1.2	0	0
NP_001099950.1;XP_006234226.1;XP_008759931.1;XP_008759935.1;XP_008759933.1	NP_001099950.1;XP_006234226.1;XP_008759931.1;XP_008759935.1;XP_008759933.1	11;10;10;9;9	11;10;10;9;9	2;2;1;1;1	NP_001099950.1 pre-mRNA-processing factor 40 homolog A [Rattus norvegicus];XP_006234226.1 PREDICTED: pre-mRNA-processing factor 40 homolog A isoform X4 [Rattus norvegicus];XP_008759931.1 PREDICTED: pre-mRNA-processing factor 40 homolog A isoform X1 [Rattus	5	11	11	2	3	6	5	5	4	6	6	6	4	3	6	5	5	4	6	6	6	4	1	1	1	1	2	2	1	2	1	12.8	12.8	3.9	108.47	953	953;988;1034;874;992	1	48	0	60.357	4.1	7.7	5.8
NP_001099953.1	NP_001099953.1	2	2	2	NP_001099953.1 grancalcin [Rattus norvegicus]	1	2	2	2	2	1	1	0	1	0	0	1	0	2	1	1	0	1	0	0	1	0	2	1	1	0	1	0	0	1	0	8.2	8.2	8.2	24.584	220	220	1	6	0.0045393	1.2295	8.2	5	5
NP_001099956.2	NP_001099956.2	10	10	10	NP_001099956.2 dnaJ homolog subfamily C member 10 precursor [Rattus norvegicus]	1	10	10	10	3	4	3	0	2	4	1	3	7	3	4	3	0	2	4	1	3	7	3	4	3	0	2	4	1	3	7	14.1	14.1	14.1	90.746	793	793	1	32	0	46.486	5.8	6.3	5.8
NP_001099958.2;NP_001304259.1	NP_001099958.2;NP_001304259.1	6;6	6;6	6;6	NP_001099958.2 mitochondrial carrier homolog 2 isoform 1 [Rattus norvegicus];NP_001304259.1 mitochondrial carrier homolog 2 isoform 1x [Rattus norvegicus]	2	6	6	6	5	5	3	5	4	5	4	5	5	5	5	3	5	4	5	4	5	5	5	5	3	5	4	5	4	5	5	28.4	28.4	28.4	33.528	303	303;314	1	53	0	59.267	26.1	26.1	13.5
NP_001099959.1	NP_001099959.1	13	13	13	NP_001099959.1 NADH dehydrogenase [ubiquinone] iron-sulfur protein 3, mitochondrial [Rattus norvegicus]	1	13	13	13	11	11	11	7	10	9	8	9	8	11	11	11	7	10	9	8	9	8	11	11	11	7	10	9	8	9	8	38.6	38.6	38.6	30.226	264	264	1	134	0	98.274	37.9	37.5	36
NP_001099967.1;XP_008765554.1;XP_008756290.1	NP_001099967.1	3;1;1	3;1;1	3;1;1	NP_001099967.1 signal recognition particle 14 kDa protein [Rattus norvegicus]	3	3	3	3	2	1	1	2	2	3	3	1	1	2	1	1	2	2	3	3	1	1	2	1	1	2	2	3	3	1	1	32.7	32.7	32.7	12.51	110	110;132;132	1	25	0	35.774	21.8	12.7	12.7
NP_001099969.1	NP_001099969.1	3	3	3	NP_001099969.1 vacuolar protein sorting-associated protein 18 homolog [Rattus norvegicus]	1	3	3	3	0	1	1	1	0	0	1	1	0	0	1	1	1	0	0	1	1	0	0	1	1	1	0	0	1	1	0	4.2	4.2	4.2	110.18	973	973	1	5	0.0001938	3.0309	0	0.7	1.5
NP_001099975.1	NP_001099975.1	3	3	3	NP_001099975.1 28S ribosomal protein S5, mitochondrial [Rattus norvegicus]	1	3	3	3	2	2	1	2	2	2	1	2	2	2	2	1	2	2	2	1	2	2	2	2	1	2	2	2	1	2	2	8.3	8.3	8.3	48.136	432	432	1	20	0	4.6069	6.5	6.5	3.2
NP_001099982.1	NP_001099982.1	6	6	6	NP_001099982.1 DDRGK domain-containing protein 1 [Rattus norvegicus]	1	6	6	6	4	3	3	2	2	3	3	3	4	4	3	3	2	2	3	3	3	4	4	3	3	2	2	3	3	3	4	36.3	36.3	36.3	38.605	339	339	1	37	0	57.777	24.2	20.1	17.7
NP_001099991.1	NP_001099991.1	2	2	2	NP_001099991.1 NTF2-related export protein 1 [Rattus norvegicus]	1	2	2	2	0	1	1	0	0	0	1	0	0	0	1	1	0	0	0	1	0	0	0	1	1	0	0	0	1	0	0	25.7	25.7	25.7	15.874	140	140	1	3	0	19.876	0	14.3	14.3
NP_001099994.1;XP_008760529.1	NP_001099994.1;XP_008760529.1	17;15	17;15	17;15	NP_001099994.1 acetyl-coenzyme A synthetase 2-like, mitochondrial [Rattus norvegicus];XP_008760529.1 PREDICTED: acetyl-coenzyme A synthetase 2-like, mitochondrial isoform X1 [Rattus norvegicus]	2	17	17	17	9	11	8	12	12	13	9	11	11	9	11	8	12	12	13	9	11	11	9	11	8	12	12	13	9	11	11	32.6	32.6	32.6	74.891	682	682;579	1	128	0	293.93	20.7	25.5	21.4
NP_001100003.1;XP_006235376.2	NP_001100003.1;XP_006235376.2	2;2	2;2	2;2	NP_001100003.1 endoplasmic reticulum-Golgi intermediate compartment protein 3 [Rattus norvegicus];XP_006235376.2 PREDICTED: endoplasmic reticulum-Golgi intermediate compartment protein 3 isoform X1 [Rattus norvegicus]	2	2	2	2	0	1	0	0	1	2	1	0	1	0	1	0	0	1	2	1	0	1	0	1	0	0	1	2	1	0	1	7.8	7.8	7.8	43.223	383	383;388	1	7	0.00019242	2.9033	0	3.9	0
NP_001100010.2;XP_006235594.1	NP_001100010.2;XP_006235594.1	6;6	6;6	6;6	NP_001100010.2 GPI transamidase component PIG-T precursor [Rattus norvegicus];XP_006235594.1 PREDICTED: GPI transamidase component PIG-T isoform X1 [Rattus norvegicus]	2	6	6	6	2	0	0	0	2	4	1	4	2	2	0	0	0	2	4	1	4	2	2	0	0	0	2	4	1	4	2	10.2	10.2	10.2	65.55	580	580;599	1	16	0	7.8364	4.5	0	0
NP_001100012.1	NP_001100012.1	2	2	2	NP_001100012.1 ubiquitin-conjugating enzyme E2 C [Rattus norvegicus]	1	2	2	2	0	0	0	0	0	0	0	2	2	0	0	0	0	0	0	0	2	2	0	0	0	0	0	0	0	2	2	16.8	16.8	16.8	19.679	179	179	1	4	0.00019666	3.2496	0	0	0
NP_001100013.1	NP_001100013.1	3	3	3	NP_001100013.1 nuclear receptor coactivator 5 [Rattus norvegicus]	1	3	3	3	1	1	1	2	0	0	0	0	0	1	1	1	2	0	0	0	0	0	1	1	1	2	0	0	0	0	0	6.6	6.6	6.6	65.316	578	578	1	5	0	5.3946	1.2	3.1	3.1
NP_001100014.1	NP_001100014.1	6	6	6	NP_001100014.1 dolichol-phosphate mannosyltransferase subunit 1 [Rattus norvegicus]	1	6	6	6	3	3	3	2	1	2	2	1	1	3	3	3	2	1	2	2	1	1	3	3	3	2	1	2	2	1	1	33.1	33.1	33.1	29.249	260	260	1	19	0	21.387	16.9	17.3	17.3
NP_001100025.1;XP_006233643.1	NP_001100025.1;XP_006233643.1	2;2	2;2	2;2	NP_001100025.1 complement component C8 gamma chain [Rattus norvegicus];XP_006233643.1 PREDICTED: complement component C8 gamma chain isoform X1 [Rattus norvegicus]	2	2	2	2	0	1	1	1	1	1	1	1	1	0	1	1	1	1	1	1	1	1	0	1	1	1	1	1	1	1	1	17.1	17.1	17.1	18.414	164	164;238	1	8	0	5.2494	0	4.3	4.3
NP_001100027.1	NP_001100027.1	4	4	4	NP_001100027.1 endothelial differentiation-related factor 1 [Rattus norvegicus]	1	4	4	4	2	1	1	2	1	1	2	3	3	2	1	1	2	1	1	2	3	3	2	1	1	2	1	1	2	3	3	29.7	29.7	29.7	16.369	148	148	1	22	0	8.0077	18.2	10.1	10.1
NP_001100028.2	NP_001100028.2	5	5	5	NP_001100028.2 14 kDa phosphohistidine phosphatase [Rattus norvegicus]	1	5	5	5	4	3	2	3	4	4	1	3	3	4	3	2	3	4	4	1	3	3	4	3	2	3	4	4	1	3	3	55.6	55.6	55.6	14.01	124	124	1	42	0	42.986	43.5	36.3	24.2
NP_001100046.2	NP_001100046.2	5	5	5	NP_001100046.2 armadillo repeat-containing protein 10 [Rattus norvegicus]	1	5	5	5	3	2	0	2	3	2	3	1	2	3	2	0	2	3	2	3	1	2	3	2	0	2	3	2	3	1	2	23.5	23.5	23.5	33.421	306	306	1	21	0	81.519	15.4	11.4	0
NP_001100054.1	NP_001100054.1	4	4	4	NP_001100054.1 replication protein A 14 kDa subunit [Rattus norvegicus]	1	4	4	4	3	3	3	2	2	2	2	4	3	3	3	3	2	2	2	2	4	3	3	3	3	2	2	2	2	4	3	47.9	47.9	47.9	13.639	121	121	1	35	0	33.92	39.7	39.7	39.7
NP_001100055.1	NP_001100055.1	5	5	5	NP_001100055.1 LSM8 homolog, U6 small nuclear RNA associated [Rattus norvegicus]	1	5	5	5	2	1	1	2	3	2	3	2	3	2	1	1	2	3	2	3	2	3	2	1	1	2	3	2	3	2	3	69.8	69.8	69.8	10.403	96	96	1	26	0	26.522	41.7	16.7	16.7
NP_001100056.1;XP_008760987.1;XP_006236247.1;XP_006236246.1;XP_006236245.1;XP_006236242.1	NP_001100056.1;XP_008760987.1;XP_006236247.1;XP_006236246.1;XP_006236245.1;XP_006236242.1	1;1;1;1;1;1	1;1;1;1;1;1	1;1;1;1;1;1	NP_001100056.1 interferon regulatory factor 5 [Rattus norvegicus];XP_008760987.1 PREDICTED: interferon regulatory factor 5 isoform X3 [Rattus norvegicus];XP_006236247.1 PREDICTED: interferon regulatory factor 5 isoform X3 [Rattus norvegicus];XP_006236246.1	6	1	1	1	0	1	1	0	0	0	0	0	0	0	1	1	0	0	0	0	0	0	0	1	1	0	0	0	0	0	0	2.4	2.4	2.4	56.083	497	497;501;501;501;508;536	1	2	0.0032618	1.4506	0	2.4	2.4
NP_001100057.1;XP_006236248.1	NP_001100057.1;XP_006236248.1	10;7	10;7	10;7	NP_001100057.1 transportin-3 [Rattus norvegicus];XP_006236248.1 PREDICTED: transportin-3 isoform X1 [Rattus norvegicus]	2	10	10	10	5	4	5	5	6	4	5	7	6	5	4	5	5	6	4	5	7	6	5	4	5	5	6	4	5	7	6	19.2	19.2	19.2	104.18	923	923;857	1	55	0	54.009	10.9	9.9	11.4
NP_001100060.1	NP_001100060.1	1	1	1	NP_001100060.1 UDP-xylose and UDP-N-acetylglucosamine transporter [Rattus norvegicus]	1	1	1	1	0	0	0	0	0	1	0	0	0	0	0	0	0	0	1	0	0	0	0	0	0	0	0	1	0	0	0	3	3	3	37.438	331	331	1	1	0.00071162	1.893	0	0	0
NP_001100063.1	NP_001100063.1	2	2	2	NP_001100063.1 mitochondrial assembly of ribosomal large subunit protein 1 [Rattus norvegicus]	1	2	2	2	0	0	1	0	0	0	0	1	0	0	0	1	0	0	0	0	1	0	0	0	1	0	0	0	0	1	0	10.9	10.9	10.9	26.127	229	229	1	2	0.00071878	2.0351	0	0	4.8
NP_001100069.1	NP_001100069.1	7	7	7	NP_001100069.1 serine protease HTRA2, mitochondrial [Rattus norvegicus]	1	7	7	7	3	3	2	3	3	3	3	2	3	3	3	2	3	3	3	3	2	3	3	3	2	3	3	3	3	2	3	24.5	24.5	24.5	49.094	458	458	1	29	0	20.106	15.1	14.6	5.9
NP_001100071.1	NP_001100071.1	2	2	2	NP_001100071.1 bolA-like protein 3 [Rattus norvegicus]	1	2	2	2	1	0	0	0	0	0	0	1	0	1	0	0	0	0	0	0	1	0	1	0	0	0	0	0	0	1	0	21.8	21.8	21.8	12.297	110	110	1	3	0	10.362	15.5	0	0
NP_001100073.1	NP_001100073.1	22	22	22	NP_001100073.1 T-complex protein 1 subunit eta [Rattus norvegicus]	1	22	22	22	15	12	15	14	13	13	15	14	13	15	12	15	14	13	13	15	14	13	15	12	15	14	13	13	15	14	13	48.3	48.3	48.3	59.658	544	544	1	176	0	208.36	33.3	30.5	32.7
NP_001100075.1	NP_001100075.1	3	3	3	NP_001100075.1 protein FAM136A [Rattus norvegicus]	1	3	3	3	2	2	2	0	3	3	2	3	2	2	2	2	0	3	3	2	3	2	2	2	2	0	3	3	2	3	2	19.6	19.6	19.6	15.625	138	138	1	21	0	4.4868	12.3	12.3	12.3
NP_001100081.1	NP_001100081.1	3	3	3	NP_001100081.1 U6 snRNA-associated Sm-like protein LSm3 [Rattus norvegicus]	1	3	3	3	3	3	3	2	3	3	2	3	3	3	3	3	2	3	3	2	3	3	3	3	3	2	3	3	2	3	3	40.2	40.2	40.2	11.845	102	102	1	32	0	91.78	40.2	40.2	40.2
NP_001100085.2	NP_001100085.2	7	7	7	NP_001100085.2 actin-related protein 2/3 complex subunit 4 [Rattus norvegicus]	1	7	7	7	6	6	5	6	6	4	4	4	4	6	6	5	6	6	4	4	4	4	6	6	5	6	6	4	4	4	4	48.2	48.2	48.2	19.667	168	168	1	55	0	26.247	41.7	41.7	29.8
NP_001100091.1	NP_001100091.1	1	1	1	NP_001100091.1 39S ribosomal protein L51, mitochondrial [Rattus norvegicus]	1	1	1	1	0	1	1	0	1	0	0	0	0	0	1	1	0	1	0	0	0	0	0	1	1	0	1	0	0	0	0	9.4	9.4	9.4	15.047	128	128	1	3	0.003244	1.3927	0	9.4	9.4
NP_001100092.1	NP_001100092.1	3	3	3	NP_001100092.1 tapasin-related protein precursor [Rattus norvegicus]	1	3	3	3	1	1	0	2	1	2	2	1	1	1	1	0	2	1	2	2	1	1	1	1	0	2	1	2	2	1	1	9.4	9.4	9.4	48.27	446	446	1	11	0	8.3334	2.7	3.4	0
NP_001100101.1;XP_008768415.1;XP_008768414.1;XP_008768413.1;XP_017454865.1;XP_008768412.1;XP_006235660.1;NP_001102074.1	NP_001100101.1;XP_008768415.1;XP_008768414.1;XP_008768413.1;XP_017454865.1;XP_008768412.1;XP_006235660.1;NP_001102074.1	2;2;2;2;2;2;1;1	2;2;2;2;2;2;1;1	2;2;2;2;2;2;1;1	NP_001100101.1 recombining binding protein suppressor of hairless [Rattus norvegicus];XP_008768415.1 PREDICTED: recombining binding protein suppressor of hairless isoform X4 [Rattus norvegicus];XP_008768414.1 PREDICTED: recombining binding protein suppress	8	2	2	2	1	0	0	0	0	0	1	0	0	1	0	0	0	0	0	1	0	0	1	0	0	0	0	0	1	0	0	5.2	5.2	5.2	51.954	465	465;486;486;487;491;526;469;515	1	2	0.0010606	1.7897	2.8	0	0
NP_001100106.1	NP_001100106.1	7	7	7	NP_001100106.1 BSD domain-containing protein 1 [Rattus norvegicus]	1	7	7	7	4	1	1	3	2	4	2	2	1	4	1	1	3	2	4	2	2	1	4	1	1	3	2	4	2	2	1	19.4	19.4	19.4	47.016	427	427	1	21	0	101.12	14.3	1.9	4.4
NP_001100115.1	NP_001100115.1	6	6	6	NP_001100115.1 probable ATP-dependent RNA helicase DDX58 [Rattus norvegicus]	1	6	6	6	2	3	2	0	2	2	1	3	1	2	3	2	0	2	2	1	3	1	2	3	2	0	2	2	1	3	1	11.5	11.5	11.5	68.362	598	598	1	19	0	13.991	4.2	7.7	4
NP_001100116.1	NP_001100116.1	7	7	7	NP_001100116.1 NADH dehydrogenase [ubiquinone] 1 beta subcomplex subunit 6 [Rattus norvegicus]	1	7	7	7	2	2	3	3	5	3	2	3	3	2	2	3	3	5	3	2	3	3	2	2	3	3	5	3	2	3	3	57	57	57	15.638	128	128	1	39	0	26.208	19.5	26.6	27.3
NP_001100119.1;XP_006238239.1	NP_001100119.1;XP_006238239.1	2;1	2;1	2;1	NP_001100119.1 alpha-catulin [Rattus norvegicus];XP_006238239.1 PREDICTED: alpha-catulin isoform X1 [Rattus norvegicus]	2	2	2	2	1	1	1	1	0	1	0	0	0	1	1	1	1	0	1	0	0	0	1	1	1	1	0	1	0	0	0	4.5	4.5	4.5	81.633	731	731;691	1	6	0	5.8615	2.7	1.8	2.7
NP_001100124.1	NP_001100124.1	3	3	3	NP_001100124.1 protein transport protein Sec61 subunit beta [Rattus norvegicus]	1	3	3	3	0	1	1	1	2	1	2	2	2	0	1	1	1	2	1	2	2	2	0	1	1	1	2	1	2	2	2	37.5	37.5	37.5	9.9884	96	96	1	16	0	16.09	0	10.4	10.4
NP_001100125.2	NP_001100125.2	16	16	16	NP_001100125.2 sialic acid synthase [Rattus norvegicus]	1	16	16	16	12	11	11	14	11	10	10	11	11	12	11	11	14	11	10	10	11	11	12	11	11	14	11	10	10	11	11	44	44	44	40.051	359	359	1	242	0	323.31	39.3	38.7	39
NP_001100129.1	NP_001100129.1	9	9	9	NP_001100129.1 U4/U6 small nuclear ribonucleoprotein Prp4 [Rattus norvegicus]	1	9	9	9	3	0	2	3	3	2	3	5	4	3	0	2	3	3	2	3	5	4	3	0	2	3	3	2	3	5	4	22.5	22.5	22.5	58.342	521	521	1	26	0	44.452	4.6	0	6
NP_001100130.1;NP_997655.1	NP_001100130.1	3;1	3;1	3;1	NP_001100130.1 V-type proton ATPase subunit G 1 [Rattus norvegicus]	2	3	3	3	3	2	2	2	2	2	3	3	3	3	2	2	2	2	2	3	3	3	3	2	2	2	2	2	3	3	3	24.6	24.6	24.6	13.71	118	118;118	1	27	0	84.23	24.6	24.6	11.9
NP_001100135.1;XP_008761996.1;XP_006238412.1;XP_008761995.1	NP_001100135.1;XP_008761996.1;XP_006238412.1;XP_008761995.1	8;8;7;7	8;8;7;7	8;8;7;7	NP_001100135.1 tetratricopeptide repeat protein 39B [Rattus norvegicus];XP_008761996.1 PREDICTED: tetratricopeptide repeat protein 39B isoform X2 [Rattus norvegicus];XP_006238412.1 PREDICTED: tetratricopeptide repeat protein 39B isoform X3 [Rattus norvegic	4	8	8	8	5	5	4	5	5	4	3	6	5	5	5	4	5	5	4	3	6	5	5	5	4	5	5	4	3	6	5	17	17	17	70.167	617	617;658;632;673	1	49	0	45.494	11	10.9	9.6
NP_001100140.1	NP_001100140.1	2	2	2	NP_001100140.1 complement component C8 alpha chain precursor [Rattus norvegicus]	1	2	2	2	0	0	0	0	0	0	1	1	0	0	0	0	0	0	0	1	1	0	0	0	0	0	0	0	1	1	0	3.6	3.6	3.6	66.273	587	587	1	2	0.0014094	1.751	0	0	0
NP_001100142.1	NP_001100142.1	3	3	3	NP_001100142.1 pre-mRNA-splicing factor 38A [Rattus norvegicus]	1	3	3	3	2	2	1	0	1	0	2	1	1	2	2	1	0	1	0	2	1	1	2	2	1	0	1	0	2	1	1	11.5	11.5	11.5	37.418	312	312	1	11	0	6.0494	6.4	7.7	5.1
NP_001100143.1	NP_001100143.1	5	5	5	NP_001100143.1 glutathione peroxidase 7 precursor [Rattus norvegicus]	1	5	5	5	1	1	1	4	4	3	1	2	0	1	1	1	4	4	3	1	2	0	1	1	1	4	4	3	1	2	0	29.6	29.6	29.6	21.089	186	186	1	22	0	9.007	9.1	9.1	9.1
NP_001100144.1	NP_001100144.1	2	2	2	NP_001100144.1 sel1 repeat-containing protein 1 [Rattus norvegicus]	1	2	2	2	1	1	2	1	2	1	2	1	0	1	1	2	1	2	1	2	1	0	1	1	2	1	2	1	2	1	0	10	10	10	25.711	231	231	1	11	0	4.4301	4.3	5.6	10
NP_001100145.1;XP_006238569.1	NP_001100145.1;XP_006238569.1	6;5	6;5	6;5	NP_001100145.1 enoyl-CoA hydratase domain-containing protein 2, mitochondrial [Rattus norvegicus];XP_006238569.1 PREDICTED: enoyl-CoA hydratase domain-containing protein 2, mitochondrial isoform X1 [Rattus norvegicus]	2	6	6	6	4	4	4	3	1	1	1	2	1	4	4	4	3	1	1	1	2	1	4	4	4	3	1	1	1	2	1	29.1	29.1	29.1	31.779	296	296;191	1	29	0	65.541	24	22.6	22.6
NP_001100147.1	NP_001100147.1	1	1	1	NP_001100147.1 EF-hand calcium-binding domain-containing protein 14 [Rattus norvegicus]	1	1	1	1	1	0	0	1	1	0	1	1	0	1	0	0	1	1	0	1	1	0	1	0	0	1	1	0	1	1	0	3.5	3.5	3.5	53.477	484	484	1	5	0.00071339	1.924	3.5	0	0
NP_001100158.1	NP_001100158.1	3	3	3	NP_001100158.1 SH3 domain-binding glutamic acid-rich-like protein 3 [Rattus norvegicus]	1	3	3	3	2	2	2	2	2	2	2	1	2	2	2	2	2	2	2	2	1	2	2	2	2	2	2	2	2	1	2	31.2	31.2	31.2	10.477	93	93	1	27	0	109.9	31.2	31.2	31.2
NP_001100163.1;XP_017448795.1;XP_017448794.1;XP_017448793.1;XP_017448792.1;XP_017448791.1;XP_017448790.1;XP_008762448.2;XP_017448789.1;XP_017448788.1;XP_008762446.2;XP_008762451.2;XP_008762445.2;XP_017448787.1;XP_008762444.2;XP_017448786.1;XP_017448785.1;XP_017448784.1;XP_008762443.2;XP_017448783.1;XP_017448796.1	NP_001100163.1;XP_017448795.1;XP_017448794.1;XP_017448793.1;XP_017448792.1;XP_017448791.1;XP_017448790.1;XP_008762448.2;XP_017448789.1;XP_017448788.1;XP_008762446.2;XP_008762451.2;XP_008762445.2;XP_017448787.1;XP_008762444.2;XP_017448786.1;XP_017448785.1;XP_017448784.1;XP_008762443.2;XP_017448783.1	13;13;13;13;13;13;13;13;13;13;13;13;13;13;13;13;13;13;13;13;2	10;10;10;10;10;10;10;10;10;10;10;10;10;10;10;10;10;10;10;10;2	10;10;10;10;10;10;10;10;10;10;10;10;10;10;10;10;10;10;10;10;2	NP_001100163.1 eukaryotic translation initiation factor 4 gamma 3 [Rattus norvegicus];XP_017448795.1 PREDICTED: eukaryotic translation initiation factor 4 gamma 3 isoform X16 [Rattus norvegicus];XP_017448794.1 PREDICTED: eukaryotic translation initiation f	21	13	10	10	3	1	2	5	2	3	5	1	4	1	0	1	4	1	2	4	0	3	1	0	1	4	1	2	4	0	3	8.5	7	7	175.43	1583	1583;1634;1634;1634;1634;1667;1737;1742;1748;1749;1753;1755;1760;1779;1780;1787;1791;1791;1797;1798;711	1	16	0	11.65	1.6	0.4	1
NP_001100169.1	NP_001100169.1	3	3	3	NP_001100169.1 beta-1,3-galactosyltransferase 6 [Rattus norvegicus]	1	3	3	3	1	1	0	0	0	0	0	1	1	1	1	0	0	0	0	0	1	1	1	1	0	0	0	0	0	1	1	15.4	15.4	15.4	37.148	325	325	1	4	0.00019283	2.9233	5.8	5.8	0
NP_001100171.1	NP_001100171.1	5	5	5	NP_001100171.1 peptidyl-prolyl cis-trans isomerase NIMA-interacting 1 [Rattus norvegicus]	1	5	5	5	2	4	4	3	4	4	3	4	5	2	4	4	3	4	4	3	4	5	2	4	4	3	4	4	3	4	5	53.3	53.3	53.3	18.332	165	165	1	42	0	72.113	18.2	46.1	46.1
NP_001100179.2	NP_001100179.2	4	4	4	NP_001100179.2 kanadaptin [Rattus norvegicus]	1	4	4	4	1	1	1	0	2	2	0	2	2	1	1	1	0	2	2	0	2	2	1	1	1	0	2	2	0	2	2	4.9	4.9	4.9	78.929	712	712	1	14	0	7.6535	1.4	1.3	1.3
NP_001100180.1;XP_008762733.1;XP_006239855.1	NP_001100180.1;XP_008762733.1;XP_006239855.1	25;25;25	25;25;25	25;25;25	NP_001100180.1 EMILIN-1 [Rattus norvegicus];XP_008762733.1 PREDICTED: EMILIN-1 isoform X2 [Rattus norvegicus];XP_006239855.1 PREDICTED: EMILIN-1 isoform X1 [Rattus norvegicus]	3	25	25	25	17	14	11	18	13	16	16	15	17	17	14	11	18	13	16	16	15	17	17	14	11	18	13	16	16	15	17	36.4	36.4	36.4	94.504	900	900;919;1017	1	189	0	323.31	26.4	21	18.7
NP_001100190.1;XP_006240030.1;XP_017449564.1;XP_006240029.1;XP_017449567.1;XP_017449566.1;XP_017449565.1	NP_001100190.1;XP_006240030.1;XP_017449564.1;XP_006240029.1;XP_017449567.1;XP_017449566.1;XP_017449565.1	6;6;6;6;4;4;4	6;6;6;6;4;4;4	6;6;6;6;4;4;4	NP_001100190.1 gamma-2-syntrophin [Rattus norvegicus];XP_006240030.1 PREDICTED: gamma-2-syntrophin isoform X3 [Rattus norvegicus];XP_017449564.1 PREDICTED: gamma-2-syntrophin isoform X2 [Rattus norvegicus];XP_006240029.1 PREDICTED: gamma-2-syntrophin isofo	7	6	6	6	3	4	4	0	1	1	0	0	1	3	4	4	0	1	1	0	0	1	3	4	4	0	1	1	0	0	1	17.8	17.8	17.8	52.546	473	473;500;521;540;439;463;481	1	16	0	72.555	9.9	11.6	11.6
NP_001100194.1	NP_001100194.1	7	7	7	NP_001100194.1 anterior gradient protein 3 precursor [Rattus norvegicus]	1	7	7	7	4	5	4	1	4	4	2	2	4	4	5	4	1	4	4	2	2	4	4	5	4	1	4	4	2	2	4	51.5	51.5	51.5	19.076	165	165	1	37	0	95.162	38.2	44.8	38.2
NP_001100203.1	NP_001100203.1	5	5	5	NP_001100203.1 trafficking protein particle complex subunit 6B [Rattus norvegicus]	1	5	5	5	0	3	3	1	2	1	1	1	2	0	3	3	1	2	1	1	1	2	0	3	3	1	2	1	1	1	2	32.3	32.3	32.3	17.977	158	158	1	17	0	38.445	0	21.5	21.5
NP_001100206.2	NP_001100206.2	10	10	10	NP_001100206.2 peptidyl-prolyl cis-trans isomerase FKBP3 [Rattus norvegicus]	1	10	10	10	6	6	6	6	6	7	8	7	9	6	6	6	6	6	7	8	7	9	6	6	6	6	6	7	8	7	9	38.4	38.4	38.4	25.178	224	224	1	78	0	135.45	29	29	29
NP_001100210.1;XP_006240285.1;XP_006240284.1;XP_017449582.1;XP_006240286.1;XP_008758365.1;NP_852044.1	NP_001100210.1;XP_006240285.1;XP_006240284.1;XP_017449582.1;XP_006240286.1	8;8;8;6;6;1;1	7;7;7;5;5;1;1	6;6;6;4;4;1;1	NP_001100210.1 serine/threonine-protein phosphatase 2A 56 kDa regulatory subunit epsilon isoform [Rattus norvegicus];XP_006240285.1 PREDICTED: serine/threonine-protein phosphatase 2A 56 kDa regulatory subunit epsilon isoform isoform X1 [Rattus norvegicus];	7	8	7	6	5	3	3	1	4	4	1	3	2	4	3	3	1	4	4	1	3	2	4	3	3	1	4	4	0	3	2	22.8	19.3	17.7	50.346	429	429;467;467;418;443;497;497	1	25	0	9.8345	15.4	9.1	7
NP_001100217.1;XP_008762979.1;REV__NP_001129279.1	NP_001100217.1;XP_008762979.1	11;11;1	11;11;1	11;11;1	NP_001100217.1 serine/threonine-protein kinase Nek9 [Rattus norvegicus];XP_008762979.1 PREDICTED: serine/threonine-protein kinase Nek9 isoform X1 [Rattus norvegicus]	3	11	11	11	4	7	3	3	4	2	4	3	3	4	7	3	3	4	2	4	3	3	4	7	3	3	4	2	4	3	3	14.7	14.7	14.7	104.88	958	958;976;372	1	36	0	61.449	5.6	8.4	4.3
NP_001100223.1	NP_001100223.1	4	4	4	NP_001100223.1 cleavage and polyadenylation specificity factor subunit 2 [Rattus norvegicus]	1	4	4	4	0	0	2	1	0	0	1	1	0	0	0	2	1	0	0	1	1	0	0	0	2	1	0	0	1	1	0	6.4	6.4	6.4	88.35	782	782	1	5	0	4.5025	0	0	2.9
NP_001100225.2;XP_006240529.1;XP_017449594.1;XP_008762988.1;XP_017449593.1	NP_001100225.2;XP_006240529.1;XP_017449594.1;XP_008762988.1;XP_017449593.1	8;8;7;7;7	8;8;7;7;7	8;8;7;7;7	NP_001100225.2 calmin [Rattus norvegicus];XP_006240529.1 PREDICTED: calmin isoform X3 [Rattus norvegicus];XP_017449594.1 PREDICTED: calmin isoform X4 [Rattus norvegicus];XP_008762988.1 PREDICTED: calmin isoform X2 [Rattus norvegicus];XP_017449593.1 PREDICT	5	8	8	8	3	3	3	3	1	1	1	2	2	3	3	3	3	1	1	1	2	2	3	3	3	3	1	1	1	2	2	12.5	12.5	12.5	113.86	1021	1021;1052;1043;1076;1107	1	21	0	10.815	7.1	7.1	7.1
NP_001100226.1	NP_001100226.1	6	6	6	NP_001100226.1 NADH dehydrogenase [ubiquinone] 1 beta subcomplex subunit 11, mitochondrial [Rattus norvegicus]	1	6	6	6	5	4	3	3	4	4	3	4	5	5	4	3	3	4	4	3	4	5	5	4	3	3	4	4	3	4	5	46.4	46.4	46.4	17.634	151	151	1	52	0	154.05	39.7	38.4	38.4
NP_001100232.1	NP_001100232.1	4	4	4	NP_001100232.1 nesprin-3 [Rattus norvegicus]	1	4	4	4	1	0	0	1	0	2	1	1	1	1	0	0	1	0	2	1	1	1	1	0	0	1	0	2	1	1	1	5.1	5.1	5.1	112.2	976	976	1	7	0	4.9179	1.3	0	0
NP_001100233.1	NP_001100233.1	1	1	1	NP_001100233.1 asparagine synthetase domain-containing protein 1 [Rattus norvegicus]	1	1	1	1	1	0	0	0	0	0	0	0	0	1	0	0	0	0	0	0	0	0	1	0	0	0	0	0	0	0	0	2.2	2.2	2.2	69.282	627	627	1	1	0.00055046	2.3204	2.2	0	0
NP_001100237.1	NP_001100237.1	1	1	1	NP_001100237.1 neutrophil elastase precursor [Rattus norvegicus]	1	1	1	1	0	0	0	1	1	1	0	0	0	0	0	0	1	1	1	0	0	0	0	0	0	1	1	1	0	0	0	5.5	5.5	5.5	29.557	271	271	1	5	0	27.629	0	0	0
NP_001100240.1	NP_001100240.1	2	2	2	NP_001100240.1 39S ribosomal protein L54, mitochondrial [Rattus norvegicus]	1	2	2	2	1	0	0	0	1	1	0	2	1	1	0	0	0	1	1	0	2	1	1	0	0	0	1	1	0	2	1	26.7	26.7	26.7	15.286	135	135	1	6	0	12.028	19.3	0	0
NP_001100242.2	NP_001100242.2	6	6	6	NP_001100242.2 NADH dehydrogenase [ubiquinone] 1 alpha subcomplex subunit 7 [Rattus norvegicus]	1	6	6	6	2	1	1	5	4	2	2	4	2	2	1	1	5	4	2	2	4	2	2	1	1	5	4	2	2	4	2	52.7	52.7	52.7	12.5	112	112	1	24	0	12.66	21.4	11.6	11.6
NP_001100251.2;XP_006225877.1;XP_006239825.1	NP_001100251.2;XP_006225877.1	8;4;3	8;4;3	8;4;3	NP_001100251.2 NADH dehydrogenase [ubiquinone] 1 alpha subcomplex subunit 12 [Rattus norvegicus];XP_006225877.1 PREDICTED: LOW QUALITY PROTEIN: NADH dehydrogenase [ubiquinone] 1 alpha subcomplex subunit 12-like isoform X2 [Rattus norvegicus]	3	8	8	8	2	3	2	1	3	2	2	3	2	2	3	2	1	3	2	2	3	2	2	3	2	1	3	2	2	3	2	64.1	64.1	64.1	17.177	145	145;166;76	1	21	0	27.802	19.3	23.4	20
NP_001100256.1	NP_001100256.1	7	7	6	NP_001100256.1 serine/threonine-protein kinase TBK1 [Rattus norvegicus]	1	7	7	6	1	0	1	1	2	1	1	3	3	1	0	1	1	2	1	1	3	3	1	0	1	0	1	0	1	3	2	12.5	12.5	11.2	83.387	729	729	1	13	0	6.9135	1.8	0	1.5
NP_001100264.2	NP_001100264.2	7	7	7	NP_001100264.2 prefoldin subunit 5 [Rattus norvegicus]	1	7	7	7	4	4	5	5	6	5	3	6	3	4	4	5	5	6	5	3	6	3	4	4	5	5	6	5	3	6	3	68.2	68.2	68.2	17.326	154	154	1	60	0	258.55	45.5	42.2	51.9
NP_001100279.1	NP_001100279.1	11	10	10	NP_001100279.1 vacuolar protein sorting-associated protein 26B [Rattus norvegicus]	1	11	10	10	7	5	4	2	5	5	4	2	6	7	5	4	2	5	5	4	2	5	7	5	4	2	5	5	4	2	5	43.2	43.2	43.2	39.124	336	336	1	44	0	151.83	37.5	30.4	23.8
NP_001100301.1	NP_001100301.1	7	7	7	NP_001100301.1 very-long-chain (3R)-3-hydroxyacyl-CoA dehydratase 3 [Rattus norvegicus]	1	7	7	7	5	4	4	1	4	4	3	2	2	5	4	4	1	4	4	3	2	2	5	4	4	1	4	4	3	2	2	23.2	23.2	23.2	43.104	362	362	1	36	0	82.375	20.4	15.5	15.7
NP_001100303.1;XP_008764464.1	NP_001100303.1	9;4	9;4	9;4	NP_001100303.1 serine beta-lactamase-like protein LACTB, mitochondrial [Rattus norvegicus]	2	9	9	9	3	2	3	5	3	5	3	4	3	3	2	3	5	3	5	3	4	3	3	2	3	5	3	5	3	4	3	22.2	22.2	22.2	60.42	550	550;355	1	34	0	30.7	8.2	4	5.6
NP_001100310.1;NP_001257315.1	NP_001100310.1	7;3	6;2	6;2	NP_001100310.1 glutathione S-transferase alpha-4 [Rattus norvegicus]	2	7	6	6	3	4	2	2	2	4	2	2	1	2	4	2	2	2	4	2	2	1	2	4	2	2	2	4	2	2	1	32.4	28.8	28.8	25.51	222	222;114	1	37	0	15.426	19.4	22.5	15.8
NP_001100321.1	NP_001100321.1	7	7	6	NP_001100321.1 cytoplasmic protein NCK1 [Rattus norvegicus]	1	7	7	6	2	1	2	2	3	2	2	3	3	2	1	2	2	3	2	2	3	3	2	0	2	2	2	1	2	3	3	28.6	28.6	26.5	42.876	377	377	1	20	0	13.547	8.8	2.1	5.8
NP_001100322.1	NP_001100322.1	6	6	6	NP_001100322.1 39S ribosomal protein L3, mitochondrial [Rattus norvegicus]	1	6	6	6	1	1	1	1	3	2	2	4	3	1	1	1	1	3	2	2	4	3	1	1	1	1	3	2	2	4	3	28.4	28.4	28.4	38.492	348	348	1	19	0	5.4914	5.2	2	2
NP_001100325.2	NP_001100325.2	4	3	3	NP_001100325.2 macrophage-stimulating protein receptor precursor [Rattus norvegicus]	1	4	3	3	1	1	0	2	0	0	1	2	1	1	0	0	1	0	0	0	2	0	1	0	0	1	0	0	0	2	0	4.3	3.7	3.7	150.37	1373	1373	1	4	0	4.8692	1.3	0.6	0
NP_001100326.1;XP_006243805.1;XP_008764727.1;XP_006243804.1;XP_006243803.1	NP_001100326.1;XP_006243805.1;XP_008764727.1;XP_006243804.1;XP_006243803.1	2;2;2;2;2	1;1;1;1;1	1;1;1;1;1	NP_001100326.1 ubiquitin-like modifier-activating enzyme 7 [Rattus norvegicus];XP_006243805.1 PREDICTED: ubiquitin-like modifier-activating enzyme 7 isoform X4 [Rattus norvegicus];XP_008764727.1 PREDICTED: ubiquitin-like modifier-activating enzyme 7 isofor	5	2	1	1	1	1	1	1	1	0	1	0	0	1	1	1	1	0	0	1	0	0	1	1	1	1	0	0	1	0	0	5	4	4	74.678	676	676;807;864;950;989	1	6	0	9.7941	4	4	4
NP_001100327.1;XP_008764731.1;XP_006243816.1;XP_006243815.1	NP_001100327.1;XP_008764731.1;XP_006243816.1;XP_006243815.1	1;1;1;1	1;1;1;1	1;1;1;1	NP_001100327.1 NCK-interacting protein with SH3 domain [Rattus norvegicus];XP_008764731.1 PREDICTED: NCK-interacting protein with SH3 domain isoform X2 [Rattus norvegicus];XP_006243816.1 PREDICTED: NCK-interacting protein with SH3 domain isoform X2 [Rattus	4	1	1	1	1	1	0	0	0	0	0	0	0	1	1	0	0	0	0	0	0	0	1	1	0	0	0	0	0	0	0	2.1	2.1	2.1	55.312	512	512;656;656;714	1	2	0.00054328	2.1429	2.1	2.1	0
NP_001100332.1	NP_001100332.1	7	7	7	NP_001100332.1 neutrophilic granule protein precursor [Rattus norvegicus]	1	7	7	7	0	0	0	3	5	6	1	0	0	0	0	0	3	5	6	1	0	0	0	0	0	3	5	6	1	0	0	46.4	46.4	46.4	19.381	168	168	1	17	0	14.457	0	0	0
NP_001100336.1;XP_006244150.1	NP_001100336.1;XP_006244150.1	5;5	5;5	5;5	NP_001100336.1 nuclease EXOG, mitochondrial [Rattus norvegicus];XP_006244150.1 PREDICTED: nuclease EXOG, mitochondrial isoform X1 [Rattus norvegicus]	2	5	5	5	2	1	3	0	1	2	0	0	1	2	1	3	0	1	2	0	0	1	2	1	3	0	1	2	0	0	1	22	22	22	41.326	368	368;392	1	10	0	6.1492	10.1	5.4	9.8
NP_001100337.1	NP_001100337.1	7	1	1	NP_001100337.1 eukaryotic translation initiation factor 1b [Rattus norvegicus]	1	7	1	1	4	5	5	2	4	5	3	5	5	0	1	1	0	0	0	0	0	0	0	1	1	0	0	0	0	0	0	44.2	29.2	29.2	12.823	113	113	1	3	0	31.367	29.2	44.2	44.2
NP_001100353.1	NP_001100353.1	2	2	2	NP_001100353.1 C-_U-editing enzyme APOBEC-2 [Rattus norvegicus]	1	2	2	2	2	0	1	0	0	0	0	1	1	2	0	1	0	0	0	0	1	1	2	0	1	0	0	0	0	1	1	9.8	9.8	9.8	25.66	224	224	1	5	0.00019478	3.1118	9.8	0	6.7
NP_001100382.1	NP_001100382.1	4	4	4	NP_001100382.1 NADH dehydrogenase [ubiquinone] 1 beta subcomplex subunit 3 [Rattus norvegicus]	1	4	4	4	2	0	2	2	2	3	3	3	3	2	0	2	2	2	3	3	3	3	2	0	2	2	2	3	3	3	3	43.4	43.4	43.4	11.267	99	99	1	22	0	11.131	18.2	0	18.2
NP_001100399.1;NP_001101636.3	NP_001100399.1	22;1	20;1	20;1	NP_001100399.1 coatomer subunit gamma-2 [Rattus norvegicus]	2	22	20	20	7	8	6	10	10	9	8	11	8	5	7	5	8	9	8	7	10	7	5	7	5	8	9	8	7	10	7	33.4	31.1	31.1	97.64	871	871;542	1	82	0	154.18	11.7	15.6	10.2
NP_001100404.1	NP_001100404.1	15	15	15	NP_001100404.1 protein POF1B [Rattus norvegicus]	1	15	15	15	9	9	9	9	12	12	10	12	11	9	9	9	9	12	12	10	12	11	9	9	9	9	12	12	10	12	11	32.7	32.7	32.7	67.659	587	587	1	114	0	190.54	18.9	23.2	21
NP_001100420.1	NP_001100420.1	4	2	2	NP_001100420.1 ras-related protein Rap-2c [Rattus norvegicus]	1	4	2	2	3	2	2	0	1	1	0	1	2	1	1	1	0	0	1	0	0	1	1	1	1	0	0	1	0	0	1	26.2	11.5	11.5	20.745	183	183	1	5	0.00054685	2.2349	19.7	20.8	20.8
NP_001100425.1	NP_001100425.1	1	1	1	NP_001100425.1 TBC1 domain family member 25 [Rattus norvegicus]	1	1	1	1	1	1	1	0	0	0	0	0	0	1	1	1	0	0	0	0	0	0	1	1	1	0	0	0	0	0	0	2.9	2.9	2.9	76.382	688	688	1	3	0	5.493	2.9	2.9	2.9
NP_001100427.1;XP_006256768.1	NP_001100427.1;XP_006256768.1	8;4	8;4	8;4	NP_001100427.1 glyoxalase domain-containing protein 5 [Rattus norvegicus];XP_006256768.1 PREDICTED: glyoxalase domain-containing protein 5 isoform X1 [Rattus norvegicus]	2	8	8	8	3	5	4	6	3	5	3	5	7	3	5	4	6	3	5	3	5	7	3	5	4	6	3	5	3	5	7	56.1	56.1	56.1	16.604	148	148;149	1	50	0	23.357	23	35.1	27.7
NP_001100434.1	NP_001100434.1	8	4	4	NP_001100434.1 F-box-like/WD repeat-containing protein TBL1X [Rattus norvegicus]	1	8	4	4	2	3	2	2	3	3	2	4	6	1	2	1	0	0	0	0	1	3	1	2	1	0	0	0	0	1	3	25	15.7	15.7	56.802	527	527	1	9	0	28.45	6.5	11.2	4.2
NP_001100440.1	NP_001100440.1	3	3	3	NP_001100440.1 membrane magnesium transporter 1 precursor [Rattus norvegicus]	1	3	3	3	2	1	1	1	1	2	1	1	2	2	1	1	1	1	2	1	1	2	2	1	1	1	1	2	1	1	2	33.6	33.6	33.6	14.677	131	131	1	12	0	22.816	25.2	18.3	18.3
NP_001100446.1	NP_001100446.1	4	4	4	NP_001100446.1 periplakin [Rattus norvegicus]	1	4	4	4	2	0	0	3	0	1	1	0	0	2	0	0	3	0	1	1	0	0	2	0	0	3	0	1	1	0	0	3.1	3.1	3.1	204.14	1754	1754	1	7	0	9.0266	1.7	0	0
NP_001100453.1	NP_001100453.1	1	1	1	NP_001100453.1 protease, serine, 32 precursor [Rattus norvegicus]	1	1	1	1	1	1	1	1	1	1	1	1	1	1	1	1	1	1	1	1	1	1	1	1	1	1	1	1	1	1	1	5.7	5.7	5.7	36.086	334	334	1	18	0	28.152	5.7	5.7	5.7
NP_001100455.1;XP_006246009.2	NP_001100455.1;XP_006246009.2	1;1	1;1	1;1	NP_001100455.1 synaptogyrin-3 [Rattus norvegicus];XP_006246009.2 PREDICTED: synaptogyrin-3 isoform X1 [Rattus norvegicus]	2	1	1	1	0	0	0	0	0	0	1	1	1	0	0	0	0	0	0	1	1	1	0	0	0	0	0	0	1	1	1	7.5	7.5	7.5	21.369	199	199;229	1	3	0.00019212	2.8842	0	0	0
NP_001100460.1;XP_008765798.1;XP_008765797.1;XP_008765796.1;XP_017452721.1;XP_008765794.1;XP_008765793.1	NP_001100460.1;XP_008765798.1;XP_008765797.1;XP_008765796.1;XP_017452721.1;XP_008765794.1;XP_008765793.1	1;1;1;1;1;1;1	1;1;1;1;1;1;1	1;1;1;1;1;1;1	NP_001100460.1 calpain-15 [Rattus norvegicus];XP_008765798.1 PREDICTED: calpain-15 isoform X6 [Rattus norvegicus];XP_008765797.1 PREDICTED: calpain-15 isoform X5 [Rattus norvegicus];XP_008765796.1 PREDICTED: calpain-15 isoform X4 [Rattus norvegicus];XP_017	7	1	1	1	0	1	0	0	0	0	0	0	0	0	1	0	0	0	0	0	0	0	0	1	0	0	0	0	0	0	0	2.4	2.4	2.4	111.89	1031	1031;1127;1137;1153;1158;1188;1193	1	1	0.0034072	1.376	0	2.4	0
NP_001100466.1	NP_001100466.1	7	1	1	NP_001100466.1 cytoplasmic FMR1 interacting protein 2 [Rattus norvegicus]	1	7	1	1	5	4	4	5	2	2	3	2	2	0	0	0	1	1	1	1	1	1	0	0	0	1	1	1	1	1	1	15.3	2.2	2.2	68.678	593	593	1	6	0.0001952	3.1409	11.1	8.6	8.6
NP_001100472.1;XP_017452747.1;XP_006246330.1;XP_017452746.1;XP_017452745.1;XP_017452744.1;XP_017452743.1	NP_001100472.1;XP_017452747.1;XP_006246330.1;XP_017452746.1;XP_017452745.1;XP_017452744.1;XP_017452743.1	10;10;10;7;7;7;7	8;8;8;5;5;5;5	8;8;8;5;5;5;5	NP_001100472.1 septin-8 [Rattus norvegicus];XP_017452747.1 PREDICTED: septin-8 isoform X6 [Rattus norvegicus];XP_006246330.1 PREDICTED: septin-8 isoform X2 [Rattus norvegicus];XP_017452746.1 PREDICTED: septin-8 isoform X5 [Rattus norvegicus];XP_017452745.1	7	10	8	8	5	3	5	5	5	5	7	5	6	4	2	4	3	3	4	5	4	4	4	2	4	3	3	4	5	4	4	28	24.5	24.5	49.856	429	429;442;481;369;370;380;422	1	44	0	126.02	15.9	10	15.4
NP_001100476.1	NP_001100476.1	3	3	3	NP_001100476.1 ATP synthase mitochondrial F1 complex assembly factor 2 [Rattus norvegicus]	1	3	3	3	2	1	0	0	1	2	1	1	2	2	1	0	0	1	2	1	1	2	2	1	0	0	1	2	1	1	2	19.1	19.1	19.1	34.192	298	298	1	10	0	43.883	12.1	3.7	0
NP_001100481.1	NP_001100481.1	3	3	3	NP_001100481.1 mannose-P-dolichol utilization defect 1 protein [Rattus norvegicus]	1	3	3	3	2	2	3	2	2	2	1	1	2	2	2	3	2	2	2	1	1	2	2	2	3	2	2	2	1	1	2	13.8	13.8	13.8	26.547	247	247	1	17	0	4.1848	10.1	10.1	13.8
NP_001100486.1	NP_001100486.1	3	3	3	NP_001100486.1 sperm-associated antigen 7 [Rattus norvegicus]	1	3	3	3	1	0	1	0	1	1	2	1	0	1	0	1	0	1	1	2	1	0	1	0	1	0	1	1	2	1	0	21.6	21.6	21.6	26.021	227	227	1	7	0	8.1859	10.1	0	5.7
NP_001100488.2	NP_001100488.2	18	18	18	NP_001100488.2 rabankyrin-5 [Rattus norvegicus]	1	18	18	18	8	6	6	8	8	11	8	10	7	8	6	6	8	8	11	8	10	7	8	6	6	8	8	11	8	10	7	22.2	22.2	22.2	128.66	1169	1169	1	86	0	199.49	13.8	8.2	8.6
NP_001100496.1;XP_017452795.1	NP_001100496.1;XP_017452795.1	5;5	4;4	4;4	NP_001100496.1 mitochondrial Rho GTPase 1 [Rattus norvegicus];XP_017452795.1 PREDICTED: mitochondrial Rho GTPase 1 isoform X1 [Rattus norvegicus]	2	5	4	4	5	3	4	2	1	3	1	2	2	4	3	3	1	1	2	1	1	1	4	3	3	1	1	2	1	1	1	14.6	12.8	12.8	72.156	631	631;704	1	24	0	39.291	14.6	7.6	9.4
NP_001100507.1	NP_001100507.1	14	14	12	NP_001100507.1 eosinophil peroxidase precursor [Rattus norvegicus]	1	14	14	12	6	9	7	5	4	5	7	7	8	6	9	7	5	4	5	7	7	8	6	9	7	4	3	3	7	7	8	22.7	22.7	19.4	81.28	715	715	1	73	0	89.668	9.2	14.8	12.7
NP_001100517.1	NP_001100517.1	1	1	1	NP_001100517.1 zinc finger protein Aiolos [Rattus norvegicus]	1	1	1	1	0	0	0	0	0	0	0	1	1	0	0	0	0	0	0	0	1	1	0	0	0	0	0	0	0	1	1	3.3	3.3	3.3	58.101	509	509	1	2	0.00019585	3.1846	0	0	0
NP_001100527.1	NP_001100527.1	2	2	2	NP_001100527.1 DDB1- and CUL4-associated factor 7 [Rattus norvegicus]	1	2	2	2	2	0	0	0	1	0	1	1	1	2	0	0	0	1	0	1	1	1	2	0	0	0	1	0	1	1	1	6.7	6.7	6.7	38.926	342	342	1	6	0.0014023	1.6921	6.7	0	0
NP_001100532.2;XP_006247749.1;XP_006247748.1	NP_001100532.2;XP_006247749.1;XP_006247748.1	21;19;19	21;19;19	21;19;19	NP_001100532.2 conserved oligomeric Golgi complex subunit 1 [Rattus norvegicus];XP_006247749.1 PREDICTED: conserved oligomeric Golgi complex subunit 1 isoform X1 [Rattus norvegicus];XP_006247748.1 PREDICTED: conserved oligomeric Golgi complex subunit 1 iso	3	21	21	21	6	5	5	9	12	9	4	7	10	6	5	5	9	12	9	4	7	10	6	5	5	9	12	9	4	7	10	27.8	27.8	27.8	108.7	980	980;960;960	1	69	0	66.485	9	5.4	6.4
NP_001100547.2	NP_001100547.2	7	7	7	NP_001100547.2 ketosamine-3-kinase [Rattus norvegicus]	1	7	7	7	4	3	4	3	4	4	1	6	2	4	3	4	3	4	4	1	6	2	4	3	4	3	4	4	1	6	2	27.8	27.8	27.8	34.169	309	309	1	36	0	28.911	16.2	10.7	20.7
NP_001100556.1	NP_001100556.1	1	1	1	NP_001100556.1 UBX domain-containing protein 7 [Rattus norvegicus]	1	1	1	1	0	0	0	0	0	0	0	1	0	0	0	0	0	0	0	0	1	0	0	0	0	0	0	0	0	1	0	17	17	17	10.98	106	106	1	1	0.0096721	0.94107	0	0	0
NP_001100572.1;XP_006248219.1	NP_001100572.1;XP_006248219.1	8;8	8;8	8;8	NP_001100572.1 protein FAM3B [Rattus norvegicus];XP_006248219.1 PREDICTED: protein FAM3B isoform X1 [Rattus norvegicus]	2	8	8	8	3	5	3	5	5	6	3	4	3	3	5	3	5	5	6	3	4	3	3	5	3	5	5	6	3	4	3	36.9	36.9	36.9	25.938	233	233;235	1	40	0	33.701	18	25.3	18
NP_001100580.1	NP_001100580.1	11	10	10	NP_001100580.1 carbonyl reductase [NADPH] 3 [Rattus norvegicus]	1	11	10	10	7	3	5	6	5	5	4	5	5	6	2	4	5	4	4	3	4	4	6	2	4	5	4	4	3	4	4	45.8	41.2	41.2	30.841	277	277	1	37	0	41.187	28.2	20.9	30.7
NP_001100596.1	NP_001100596.1	2	2	2	NP_001100596.1 COX19 cytochrome c oxidase assembly homolog [Rattus norvegicus]	1	2	2	2	0	0	0	0	1	1	1	1	1	0	0	0	0	1	1	1	1	1	0	0	0	0	1	1	1	1	1	21.7	21.7	21.7	10.864	92	92	1	5	0.00071174	1.8951	0	0	0
NP_001100599.1	NP_001100599.1	7	7	7	NP_001100599.1 COP9 signalosome complex subunit 6 [Rattus norvegicus]	1	7	7	7	4	3	2	3	1	2	2	2	2	4	3	2	3	1	2	2	2	2	4	3	2	3	1	2	2	2	2	31.7	31.7	31.7	37.702	344	344	1	27	0	14.994	17.7	18.6	11.3
NP_001100610.1;XP_008767451.1;XP_008767450.1	NP_001100610.1;XP_008767451.1;XP_008767450.1	3;3;3	3;3;3	3;3;3	NP_001100610.1 kinetochore-associated protein 1 [Rattus norvegicus];XP_008767451.1 PREDICTED: kinetochore-associated protein 1 isoform X1 [Rattus norvegicus];XP_008767450.1 PREDICTED: kinetochore-associated protein 1 isoform X1 [Rattus norvegicus]	3	3	3	3	0	0	0	0	0	0	1	1	1	0	0	0	0	0	0	1	1	1	0	0	0	0	0	0	1	1	1	2	2	2	233.24	2050	2050;2205;2205	1	3	0.0038943	1.3197	0	0	0
NP_001100611.1	NP_001100611.1	3	3	3	NP_001100611.1 protein phosphatase PTC7 homolog [Rattus norvegicus]	1	3	3	3	1	1	2	1	1	0	0	1	1	1	1	2	1	1	0	0	1	1	1	1	2	1	1	0	0	1	1	14.7	14.7	14.7	32.847	307	307	1	8	0	4.1287	4.9	4.9	9.8
NP_001100616.1	NP_001100616.1	6	6	6	NP_001100616.1 replication factor C subunit 5 [Rattus norvegicus]	1	6	6	6	1	2	1	0	2	2	3	2	1	1	2	1	0	2	2	3	2	1	1	2	1	0	2	2	3	2	1	24.3	24.3	24.3	38.098	338	338	1	14	0	9.8774	3.6	7.7	4.1
NP_001100626.1;XP_006249563.1;XP_006249564.1	NP_001100626.1;XP_006249563.1;XP_006249564.1	10;9;8	10;9;8	10;9;8	NP_001100626.1 squamous cell carcinoma antigen recognized by T-cells 3 [Rattus norvegicus];XP_006249563.1 PREDICTED: squamous cell carcinoma antigen recognized by T-cells 3 isoform X1 [Rattus norvegicus];XP_006249564.1 PREDICTED: squamous cell carcinoma an	3	10	10	10	4	6	4	3	4	6	3	4	7	4	6	4	3	4	6	3	4	7	4	6	4	3	4	6	3	4	7	14	14	14	109.42	960	960;978;847	1	56	0	197.98	7.4	10.1	8
NP_001100640.1	NP_001100640.1	2	2	2	NP_001100640.1 transcription factor CP2-like protein 1 [Rattus norvegicus]	1	2	2	2	1	0	0	0	0	0	0	1	0	1	0	0	0	0	0	0	1	0	1	0	0	0	0	0	0	1	0	5.2	5.2	5.2	54.771	479	479	1	2	0.0042208	1.2727	3.3	0	0
NP_001100650.1;XP_017454286.1;XP_008767785.1	NP_001100650.1;XP_017454286.1;XP_008767785.1	11;9;9	11;9;9	11;9;9	NP_001100650.1 importin-9 [Rattus norvegicus];XP_017454286.1 PREDICTED: importin-9 isoform X2 [Rattus norvegicus];XP_008767785.1 PREDICTED: importin-9 isoform X1 [Rattus norvegicus]	3	11	11	11	7	6	6	7	3	5	7	4	4	7	6	6	7	3	5	7	4	4	7	6	6	7	3	5	7	4	4	19.3	19.3	19.3	116.01	1041	1041;890;1005	1	57	0	180.43	13.8	11.5	11
NP_001100653.1	NP_001100653.1	8	8	8	NP_001100653.1 60 kDa SS-A/Ro ribonucleoprotein [Rattus norvegicus]	1	8	8	8	6	5	4	3	4	4	6	4	2	6	5	4	3	4	4	6	4	2	6	5	4	3	4	4	6	4	2	18	18	18	60.042	538	538	1	51	0	42.084	15.1	13	10
NP_001100654.1;XP_006250058.1;XP_006250057.1;XP_008767855.1	NP_001100654.1;XP_006250058.1;XP_006250057.1;XP_008767855.1	36;36;36;27	36;36;36;27	36;36;36;27	NP_001100654.1 ATP-dependent RNA helicase A [Rattus norvegicus];XP_006250058.1 PREDICTED: ATP-dependent RNA helicase A isoform X2 [Rattus norvegicus];XP_006250057.1 PREDICTED: ATP-dependent RNA helicase A isoform X1 [Rattus norvegicus];XP_008767855.1 PREDI	4	36	36	36	21	20	18	25	20	20	18	16	19	21	20	18	25	20	20	18	16	19	21	20	18	25	20	20	18	16	19	39.8	39.8	39.8	131.73	1174	1174;1391;1392;1175	1	222	0	316.21	26.1	22.7	20
NP_001100678.1	NP_001100678.1	15	15	10	NP_001100678.1 septin-11 [Rattus norvegicus]	1	15	15	10	6	12	8	10	13	12	11	10	11	6	12	8	10	13	12	11	10	11	4	8	4	6	9	9	7	7	8	38.9	38.9	26.4	49.781	432	432	1	122	0	298.26	20.6	32.9	26.4
NP_001100683.1	NP_001100683.1	21	21	21	NP_001100683.1 ubiquitin-like modifier-activating enzyme 6 [Rattus norvegicus]	1	21	21	21	12	10	13	8	13	13	6	12	11	12	10	13	8	13	13	6	12	11	12	10	13	8	13	13	6	12	11	28	28	28	117.93	1053	1053	1	111	0	69.538	17.7	14	19.2
NP_001100690.1	NP_001100690.1	3	3	3	NP_001100690.1 anaphase-promoting complex subunit 4 [Rattus norvegicus]	1	3	3	3	3	1	1	1	1	1	1	1	1	3	1	1	1	1	1	1	1	1	3	1	1	1	1	1	1	1	1	5.9	5.9	5.9	91.776	807	807	1	11	0	17.497	5.9	2	2
NP_001100695.2	NP_001100695.2	4	4	4	NP_001100695.2 VPS10 domain receptor protein SORCS 2 precursor [Rattus norvegicus]	1	4	4	4	3	0	1	0	0	0	0	0	0	3	0	1	0	0	0	0	0	0	3	0	1	0	0	0	0	0	0	4.7	4.7	4.7	129.01	1159	1159	1	4	0	4.9213	3.9	0	0.8
NP_001100705.1	NP_001100705.1	26	26	26	NP_001100705.1 splicing factor 3A subunit 1 [Rattus norvegicus]	1	26	26	26	7	15	11	12	14	18	14	17	17	7	15	11	12	14	18	14	17	17	7	15	11	12	14	18	14	17	17	37.3	37.3	37.3	88.587	791	791	1	163	0	217.84	15.9	26.3	22.3
NP_001100706.1;XP_017454717.1;XP_017454715.1;XP_017454714.1;XP_017454716.1	NP_001100706.1;XP_017454717.1;XP_017454715.1;XP_017454714.1;XP_017454716.1	5;5;5;5;4	5;5;5;5;4	5;5;5;5;4	NP_001100706.1 protein cordon-bleu [Rattus norvegicus];XP_017454717.1 PREDICTED: protein cordon-bleu isoform X4 [Rattus norvegicus];XP_017454715.1 PREDICTED: protein cordon-bleu isoform X2 [Rattus norvegicus];XP_017454714.1 PREDICTED: protein cordon-bleu i	5	5	5	5	2	0	0	0	0	1	2	1	1	2	0	0	0	0	1	2	1	1	2	0	0	0	0	1	2	1	1	7	7	7	122.27	1133	1133;1284;1326;1341;1316	1	8	0	6.5015	3.1	0	0
NP_001100708.1;XP_017454720.1;XP_017454719.1;XP_006251507.1;XP_017454718.1;XP_006251506.1	NP_001100708.1;XP_017454720.1;XP_017454719.1;XP_006251507.1;XP_017454718.1;XP_006251506.1	7;7;7;7;7;7	7;7;7;7;7;7	7;7;7;7;7;7	NP_001100708.1 transmembrane emp24 domain-containing protein 4 [Rattus norvegicus];XP_017454720.1 PREDICTED: transmembrane emp24 domain-containing protein 4 isoform X5 [Rattus norvegicus];XP_017454719.1 PREDICTED: transmembrane emp24 domain-containing prot	6	7	7	7	4	4	4	5	4	6	5	6	6	4	4	4	5	4	6	5	6	6	4	4	4	5	4	6	5	6	6	41.7	41.7	41.7	19.577	168	168;222;223;223;227;227	1	65	0	129.48	25	25	30.4
NP_001100718.1;XP_006251701.2	NP_001100718.1;XP_006251701.2	76;76	76;76	76;76	NP_001100718.1 vinculin [Rattus norvegicus];XP_006251701.2 PREDICTED: vinculin isoform X1 [Rattus norvegicus]	2	76	76	76	60	63	56	57	50	50	51	49	45	60	63	56	57	50	50	51	49	45	60	63	56	57	50	50	51	49	45	72	72	72	116.61	1066	1066;1134	1	960	0	323.31	62.9	65.5	61.5
NP_001100719.1	NP_001100719.1	3	3	3	NP_001100719.1 catechol O-methyltransferase domain-containing protein 1 [Rattus norvegicus]	1	3	3	3	3	2	2	2	3	3	2	2	2	3	2	2	2	3	3	2	2	2	3	2	2	2	3	3	2	2	2	21.8	21.8	21.8	28.987	262	262	1	35	0	34.474	21.8	12.6	12.6
NP_001100731.1	NP_001100731.1	19	19	19	NP_001100731.1 FACT complex subunit SPT16 [Rattus norvegicus]	1	19	19	19	6	7	11	9	4	6	10	6	9	6	7	11	9	4	6	10	6	9	6	7	11	9	4	6	10	6	9	22.3	22.3	22.3	119.86	1047	1047	1	71	0	114.66	7.1	7.8	13
NP_001100758.1;XP_006251843.1;XP_006251842.1;XP_008768824.1;XP_003751493.2;XP_008768823.1	NP_001100758.1;XP_006251843.1;XP_006251842.1	106;106;106;42;42;42	93;93;93;38;38;38	93;93;93;38;38;38	NP_001100758.1 filamin-B [Rattus norvegicus];XP_006251843.1 PREDICTED: filamin-B isoform X2 [Rattus norvegicus];XP_006251842.1 PREDICTED: filamin-B isoform X1 [Rattus norvegicus]	6	106	93	93	78	65	62	72	70	72	66	75	69	67	56	54	62	62	64	59	67	61	67	56	54	62	62	64	59	67	61	55.2	52.8	52.8	275.31	2578	2578;2591;2602;1137;1150;1161	1	896	0	323.31	44.1	40.3	38.1
NP_001100759.1;XP_008761103.1	NP_001100759.1;XP_008761103.1	2;1	2;1	2;1	NP_001100759.1 U6 snRNA-associated Sm-like protein LSm5 [Rattus norvegicus];XP_008761103.1 PREDICTED: U6 snRNA-associated Sm-like protein LSm5 isoform X1 [Rattus norvegicus]	2	2	2	2	2	2	2	2	2	2	2	2	2	2	2	2	2	2	2	2	2	2	2	2	2	2	2	2	2	2	2	46.2	46.2	46.2	9.9374	91	91;81	1	30	0	41.885	46.2	46.2	46.2
NP_001100761.2;XP_008769217.1;CON__Q0VCM5	NP_001100761.2;XP_008769217.1	15;14;1	15;14;1	15;14;1	NP_001100761.2 inter-alpha-trypsin inhibitor heavy chain H1 precursor [Rattus norvegicus];XP_008769217.1 PREDICTED: inter-alpha-trypsin inhibitor heavy chain H1 isoform X1 [Rattus norvegicus]	3	15	15	15	8	9	7	7	5	6	6	8	9	8	9	7	7	5	6	6	8	9	8	9	7	7	5	6	6	8	9	26	26	26	100.59	904	904;866;906	1	78	0	176.27	17	16.7	14.6
NP_001100776.1	NP_001100776.1	4	4	4	NP_001100776.1 armadillo repeat-containing protein 6 [Rattus norvegicus]	1	4	4	4	1	2	1	0	3	2	1	2	3	1	2	1	0	3	2	1	2	3	1	2	1	0	3	2	1	2	3	24.1	24.1	24.1	30.021	274	274	1	15	0	8.2493	4	12	6.6
NP_001100783.1;XP_017455617.1;XP_017455616.1;XP_017455615.1;XP_017455614.1;XP_017455618.1	NP_001100783.1;XP_017455617.1;XP_017455616.1;XP_017455615.1;XP_017455614.1;XP_017455618.1	2;2;2;2;2;1	2;2;2;2;2;1	2;2;2;2;2;1	NP_001100783.1 CCR4-NOT transcription complex subunit 7 [Rattus norvegicus];XP_017455617.1 PREDICTED: CCR4-NOT transcription complex subunit 7 isoform X1 [Rattus norvegicus];XP_017455616.1 PREDICTED: CCR4-NOT transcription complex subunit 7 isoform X1 [Rat	6	2	2	2	0	0	1	0	0	0	0	0	1	0	0	1	0	0	0	0	0	1	0	0	1	0	0	0	0	0	1	8.8	8.8	8.8	32.718	285	285;298;298;298;298;179	1	2	0.0019221	1.6401	0	0	3.9
NP_001100790.1;XP_017455631.1	NP_001100790.1;XP_017455631.1	7;6	7;6	7;6	NP_001100790.1 proline synthase co-transcribed bacterial homolog protein [Rattus norvegicus];XP_017455631.1 PREDICTED: proline synthase co-transcribed bacterial homolog protein isoform X1 [Rattus norvegicus]	2	7	7	7	3	5	3	5	6	5	5	5	3	3	5	3	5	6	5	5	5	3	3	5	3	5	6	5	5	5	3	33.8	33.8	33.8	30.104	275	275;245	1	53	0	79.025	17.8	27.3	17.8
NP_001100793.1;XP_006253503.1;XP_006253502.1	NP_001100793.1;XP_006253503.1;XP_006253502.1	4;4;4	4;4;4	4;4;4	NP_001100793.1 gamma-tubulin complex component 3 [Rattus norvegicus];XP_006253503.1 PREDICTED: gamma-tubulin complex component 3 isoform X2 [Rattus norvegicus];XP_006253502.1 PREDICTED: gamma-tubulin complex component 3 isoform X1 [Rattus norvegicus]	3	4	4	4	4	0	0	0	0	0	0	0	0	4	0	0	0	0	0	0	0	0	4	0	0	0	0	0	0	0	0	8.1	8.1	8.1	67.898	606	606;866;902	1	4	0	23.177	8.1	0	0
NP_001100798.1	NP_001100798.1	2	2	2	NP_001100798.1 ephrin-B2 [Rattus norvegicus]	1	2	2	2	0	1	1	0	1	2	1	1	1	0	1	1	0	1	2	1	1	1	0	1	1	0	1	2	1	1	1	7.7	7.7	7.7	37.281	336	336	1	8	0	11.202	0	4.5	4.5
NP_001100809.1;XP_017455997.1	NP_001100809.1;XP_017455997.1	2;2	2;2	2;2	NP_001100809.1 tyrosine-protein kinase transmembrane receptor ROR2 precursor [Rattus norvegicus];XP_017455997.1 PREDICTED: tyrosine-protein kinase transmembrane receptor ROR2 isoform X1 [Rattus norvegicus]	2	2	2	2	1	1	1	0	0	0	0	0	0	1	1	1	0	0	0	0	0	0	1	1	1	0	0	0	0	0	0	3	3	3	105.02	943	943;950	1	5	0	7.9451	1.1	1.9	1.9
NP_001100817.1;XP_006253869.1	NP_001100817.1;XP_006253869.1	2;2	2;2	2;2	NP_001100817.1 biogenesis of lysosome-related organelles complex 1 subunit 5 [Rattus norvegicus];XP_006253869.1 PREDICTED: biogenesis of lysosome-related organelles complex 1 subunit 5 isoform X1 [Rattus norvegicus]	2	2	2	2	1	1	0	0	0	1	0	0	1	1	1	0	0	0	1	0	0	1	1	1	0	0	0	1	0	0	1	11.8	11.8	11.8	21.539	187	187;232	1	5	0.00055638	2.4771	4.8	7	0
NP_001100825.1	NP_001100825.1	5	5	5	NP_001100825.1 vacuolar protein sorting-associated protein 41 homolog [Rattus norvegicus]	1	5	5	5	1	0	0	2	1	1	0	2	2	1	0	0	2	1	1	0	2	2	1	0	0	2	1	1	0	2	2	7.8	7.8	7.8	86.374	745	745	1	9	0	4.1681	1.5	0	0
NP_001100827.1;XP_006254075.1;XP_006254073.1	NP_001100827.1;XP_006254075.1;XP_006254073.1	1;1;1	1;1;1	1;1;1	NP_001100827.1 rho GTPase-activating protein 12 [Rattus norvegicus];XP_006254075.1 PREDICTED: rho GTPase-activating protein 12 isoform X3 [Rattus norvegicus];XP_006254073.1 PREDICTED: rho GTPase-activating protein 12 isoform X1 [Rattus norvegicus]	3	1	1	1	0	0	0	0	1	0	0	0	0	0	0	0	0	1	0	0	0	0	0	0	0	0	1	0	0	0	0	3.6	3.6	3.6	56.53	494	494;791;838	1	1	0.006814	1.0963	0	0	0
NP_001100831.1	NP_001100831.1	4	4	4	NP_001100831.1 la-related protein 4B [Rattus norvegicus]	1	4	4	4	1	1	1	2	1	2	2	4	3	1	1	1	2	1	2	2	4	3	1	1	1	2	1	2	2	4	3	9.2	9.2	9.2	81.185	738	738	1	17	0	19.246	1.4	1.4	1.4
NP_001100835.1	NP_001100835.1	9	9	5	NP_001100835.1 calcium/calmodulin-dependent protein kinase type 1D [Rattus norvegicus]	1	9	9	5	4	2	4	4	5	5	5	5	4	4	2	4	4	5	5	5	5	4	1	1	2	1	3	2	2	2	1	29.6	29.6	17.9	42.918	385	385	1	40	0	34.773	12.7	4.7	10.4
NP_001100846.2;XP_006254985.1;XP_017444862.1;XP_017444861.1;XP_006229728.1;NP_001101961.2	NP_001100846.2;XP_006254985.1	21;21;1;1;1;1	21;21;1;1;1;1	21;21;1;1;1;1	NP_001100846.2 NAD-dependent malic enzyme, mitochondrial [Rattus norvegicus];XP_006254985.1 PREDICTED: NAD-dependent malic enzyme, mitochondrial isoform X1 [Rattus norvegicus]	6	21	21	21	14	18	13	9	11	10	8	10	12	14	18	13	9	11	10	8	10	12	14	18	13	9	11	10	8	10	12	45.5	45.5	45.5	65.351	584	584;591;571;571;571;605	1	132	0	194.93	35.4	42	29.3
NP_001100863.2	NP_001100863.2	30	30	30	NP_001100863.2 protein diaphanous homolog 1 [Rattus norvegicus]	1	30	30	30	16	12	12	11	14	13	14	17	16	16	12	12	11	14	13	14	17	16	16	12	12	11	14	13	14	17	16	27.5	27.5	27.5	140.31	1265	1265	1	153	0	323.31	17.6	13.1	12.6
NP_001100864.1	NP_001100864.1	1	1	1	NP_001100864.1 transcription initiation factor TFIID subunit 7 [Rattus norvegicus]	1	1	1	1	1	0	0	0	0	0	0	0	0	1	0	0	0	0	0	0	0	0	1	0	0	0	0	0	0	0	0	2.9	2.9	2.9	39.122	341	341	1	1	0.0079457	1.0414	2.9	0	0
NP_001100875.1	NP_001100875.1	2	2	2	NP_001100875.1 E3 ubiquitin-protein ligase MIB1 [Rattus norvegicus]	1	2	2	2	0	0	0	0	1	1	1	2	1	0	0	0	0	1	1	1	2	1	0	0	0	0	1	1	1	2	1	3.1	3.1	3.1	110.12	1006	1006	1	6	0.0034037	1.3593	0	0	0
NP_001100877.1	NP_001100877.1	1	1	1	NP_001100877.1 cadherin-5 [Rattus norvegicus]	1	1	1	1	1	1	0	0	0	0	0	1	1	1	1	0	0	0	0	0	1	1	1	1	0	0	0	0	0	1	1	2.1	2.1	2.1	87.169	776	776	1	5	0	9.4071	2.1	2.1	0
NP_001100889.1;XP_017457577.1;XP_017457578.1;XP_006257589.3;XP_006257588.3;XP_006257587.3;XP_008771746.2;NP_001258119.1	NP_001100889.1	29;7;7;7;7;7;7;7	29;7;7;7;7;7;7;7	29;7;7;7;7;7;7;7	NP_001100889.1 SWI/SNF-related matrix-associated actin-dependent regulator of chromatin subfamily A member 5 [Rattus norvegicus]	8	29	29	29	11	10	12	10	8	6	9	13	12	11	10	12	10	8	6	9	13	12	11	10	12	10	8	6	9	13	12	27	27	27	116.65	995	995;985;1041;1046;1055;1057;1062;1062	1	97	0	95.653	11	12	13.2
NP_001100890.1;XP_002726404.1;XP_003749751.1;XP_008772908.1	NP_001100890.1;XP_002726404.1;XP_003749751.1	11;11;11;1	11;11;11;1	4;4;4;0	NP_001100890.1 RNA-binding motif protein, X chromosome retrogene-like [Rattus norvegicus];XP_002726404.1 PREDICTED: RNA binding motif protein, X-linked-like-1 [Rattus norvegicus];XP_003749751.1 PREDICTED: RNA binding motif protein, X-linked-like-1 [Rattus	4	11	11	4	4	5	3	6	5	4	6	5	3	4	5	3	6	5	4	6	5	3	3	1	0	1	2	1	1	2	1	28.1	28.1	11.1	42.203	388	388;441;446;252	1	47	0	44.004	9.5	15.2	9
NP_001100892.1	NP_001100892.1	2	2	2	NP_001100892.1 THAP domain-containing protein 11 [Rattus norvegicus]	1	2	2	2	0	1	1	0	2	1	0	1	0	0	1	1	0	2	1	0	1	0	0	1	1	0	2	1	0	1	0	5.5	5.5	5.5	33.635	308	308	1	6	0.00071149	1.8883	0	2.6	2.9
NP_001100896.1	NP_001100896.1	13	13	13	NP_001100896.1 26S proteasome non-ATPase regulatory subunit 7 [Rattus norvegicus]	1	13	13	13	10	7	6	9	8	7	9	7	7	10	7	6	9	8	7	9	7	7	10	7	6	9	8	7	9	7	7	48.4	48.4	48.4	36.491	320	320	1	100	0	253.23	41.2	35.3	31.9
NP_001100902.1	NP_001100902.1	1	1	1	NP_001100902.1 contactin-associated protein-like 4 precursor [Rattus norvegicus]	1	1	1	1	0	1	0	0	0	0	0	0	0	0	1	0	0	0	0	0	0	0	0	1	0	0	0	0	0	0	0	1.1	1.1	1.1	145.07	1310	1310	1	1	0.001408	1.7374	0	1.1	0
NP_001100916.1	NP_001100916.1	5	5	5	NP_001100916.1 PDZ domain-containing protein 8 [Rattus norvegicus]	1	5	5	5	3	2	0	1	2	1	0	1	2	3	2	0	1	2	1	0	1	2	3	2	0	1	2	1	0	1	2	6.1	6.1	6.1	128.25	1152	1152	1	12	0	12.522	3.4	2.2	0
NP_001100919.1	NP_001100919.1	36	36	36	NP_001100919.1 calcium-activated chloride channel regulator 1 precursor [Rattus norvegicus]	1	36	36	36	30	30	27	35	27	27	25	26	26	30	30	27	35	27	27	25	26	26	30	30	27	35	27	27	25	26	26	43.1	43.1	43.1	99.826	910	910	1	543	0	323.31	37.3	36.8	34.7
NP_001100922.1;XP_006227846.1	NP_001100922.1;XP_006227846.1	9;8	9;8	9;8	NP_001100922.1 programmed cell death protein 6 [Rattus norvegicus];XP_006227846.1 PREDICTED: programmed cell death protein 6 isoform X1 [Rattus norvegicus]	2	9	9	9	6	3	6	5	5	4	8	5	4	6	3	6	5	5	4	8	5	4	6	3	6	5	5	4	8	5	4	66.5	66.5	66.5	21.904	191	191;189	1	52	0	88.547	53.4	26.7	53.4
NP_001100935.1	NP_001100935.1	2	2	2	NP_001100935.1 chromodomain-helicase-DNA-binding protein 1 [Rattus norvegicus]	1	2	2	2	0	0	0	0	1	0	0	1	1	0	0	0	0	1	0	0	1	1	0	0	0	0	1	0	0	1	1	1.3	1.3	1.3	196.47	1711	1711	1	4	0.0077892	1.0528	0	0	0
NP_001100941.2	NP_001100941.2	5	5	5	NP_001100941.2 CCR4-NOT transcription complex subunit 3 [Rattus norvegicus]	1	5	5	5	2	1	2	3	2	0	1	2	2	2	1	2	3	2	0	1	2	2	2	1	2	3	2	0	1	2	2	6.9	6.9	6.9	81.88	751	751	1	15	0	7.0622	2.7	1.9	3.6
NP_001100953.1	NP_001100953.1	2	2	2	NP_001100953.1 interferon regulatory factor 2-binding protein 1 [Rattus norvegicus]	1	2	2	2	1	2	2	0	1	1	0	1	2	1	2	2	0	1	1	0	1	2	1	2	2	0	1	1	0	1	2	7.9	7.9	7.9	61.794	584	584	1	13	0	8.2511	4.3	7.9	7.9
NP_001100967.2	NP_001100967.2	20	20	20	NP_001100967.2 transcription elongation factor SPT5 [Rattus norvegicus]	1	20	20	20	8	2	4	5	6	4	8	8	8	8	2	4	5	6	4	8	8	8	8	2	4	5	6	4	8	8	8	27.1	27.1	27.1	120.82	1083	1083	1	59	0	63.744	11.4	3.1	6.6
NP_001100985.1	NP_001100985.1	5	5	5	NP_001100985.1 heme-binding protein 2 [Rattus norvegicus]	1	5	5	5	3	1	1	2	4	3	2	2	1	3	1	1	2	4	3	2	2	1	3	1	1	2	4	3	2	2	1	28.6	28.6	28.6	22.95	203	203	1	19	0	19.127	19.7	7.4	7.4
NP_001100987.1;XP_017444641.1	NP_001100987.1;XP_017444641.1	33;18	3;2	3;2	NP_001100987.1 cytoplasmic FMR1-interacting protein 1 [Rattus norvegicus];XP_017444641.1 PREDICTED: cytoplasmic FMR1-interacting protein 1 isoform X2 [Rattus norvegicus]	2	33	3	3	19	18	17	17	11	6	19	10	11	0	1	3	1	0	0	2	0	1	0	1	3	1	0	0	2	0	1	30.2	2.9	2.9	145.26	1253	1253;693	1	8	0	19.212	17.7	17.4	15.5
NP_001100998.1;XP_008757753.1;XP_006229493.1	NP_001100998.1;XP_008757753.1;XP_006229493.1	3;2;2	3;2;2	3;2;2	NP_001100998.1 guanosine-3,5-bis(diphosphate) 3-pyrophosphohydrolase MESH1 [Rattus norvegicus];XP_008757753.1 PREDICTED: guanosine-3,5-bis(diphosphate) 3-pyrophosphohydrolase MESH1 isoform X2 [Rattus norvegicus];XP_006229493.1 PREDICTED: guanosine-3	3	3	3	3	0	0	1	0	0	0	0	1	2	0	0	1	0	0	0	0	1	2	0	0	1	0	0	0	0	1	2	22.3	22.3	22.3	20.254	179	179;143;144	1	4	0.0032545	1.4261	0	0	9.5
NP_001101000.1	NP_001101000.1	8	8	8	NP_001101000.1 arpin [Rattus norvegicus]	1	8	8	8	4	3	3	3	4	5	4	3	2	4	3	3	3	4	5	4	3	2	4	3	3	3	4	5	4	3	2	38.9	38.9	38.9	25.232	226	226	1	31	0	65.483	26.5	20.8	20.8
NP_001101004.1	NP_001101004.1	19	19	19	NP_001101004.1 elongation factor-like GTPase 1 [Rattus norvegicus]	1	19	19	19	7	7	5	8	10	10	5	10	10	7	7	5	8	10	10	5	10	10	7	7	5	8	10	10	5	10	10	20.5	20.5	20.5	125.69	1127	1127	1	81	0	99.206	9.3	8.8	6.1
NP_001101010.1;XP_006229941.1;XP_006229940.1	NP_001101010.1;XP_006229941.1;XP_006229940.1	2;1;1	2;1;1	2;1;1	NP_001101010.1 RING finger protein 121 [Rattus norvegicus];XP_006229941.1 PREDICTED: RING finger protein 121 isoform X2 [Rattus norvegicus];XP_006229940.1 PREDICTED: RING finger protein 121 isoform X1 [Rattus norvegicus]	3	2	2	2	1	0	0	0	1	2	1	2	1	1	0	0	0	1	2	1	2	1	1	0	0	0	1	2	1	2	1	8	8	8	37.972	327	327;304;315	1	10	0	4.4414	5.2	0	0
NP_001101015.1	NP_001101015.1	18	18	18	NP_001101015.1 importin-7 [Rattus norvegicus]	1	18	18	18	11	14	12	7	12	11	9	11	14	11	14	12	7	12	11	9	11	14	11	14	12	7	12	11	9	11	14	22.9	22.9	22.9	119.49	1038	1038	1	126	0	159.46	15.4	18	17.4
NP_001101037.1;XP_008758342.1	NP_001101037.1;XP_008758342.1	4;2	4;2	4;2	NP_001101037.1 39S ribosomal protein L21, mitochondrial [Rattus norvegicus];XP_008758342.1 PREDICTED: 39S ribosomal protein L21, mitochondrial isoform X1 [Rattus norvegicus]	2	4	4	4	0	1	2	2	0	1	1	2	3	0	1	2	2	0	1	1	2	3	0	1	2	2	0	1	1	2	3	25.4	25.4	25.4	23.39	209	209;208	1	12	0	6.9316	0	4.8	14.8
NP_001101046.1	NP_001101046.1	4	4	4	NP_001101046.1 integrator complex subunit 5 [Rattus norvegicus]	1	4	4	4	0	1	1	1	2	1	1	3	1	0	1	1	1	2	1	1	3	1	0	1	1	1	2	1	1	3	1	5.3	5.3	5.3	108.4	1019	1019	1	11	0	7.4683	0	1.3	1.3
NP_001101048.1;XP_006231151.1	NP_001101048.1;XP_006231151.1	2;2	2;2	2;2	NP_001101048.1 B-lymphocyte antigen CD20 [Rattus norvegicus];XP_006231151.1 PREDICTED: B-lymphocyte antigen CD20 isoform X1 [Rattus norvegicus]	2	2	2	2	0	0	0	0	0	0	1	1	0	0	0	0	0	0	0	1	1	0	0	0	0	0	0	0	1	1	0	7.4	7.4	7.4	32.602	297	297;298	1	2	0	7.3239	0	0	0
NP_001101056.1	NP_001101056.1	5	1	1	NP_001101056.1 cleavage stimulation factor subunit 2 tau variant [Rattus norvegicus]	1	5	1	1	3	2	3	3	3	3	1	1	3	0	0	0	1	1	0	0	0	0	0	0	0	1	1	0	0	0	0	12.7	1.6	1.6	65.515	629	629	1	2	0.0019204	1.6332	8.7	7	9.4
NP_001101063.1;XP_008758648.1;XP_006231545.1	NP_001101063.1;XP_008758648.1;XP_006231545.1	1;1;1	1;1;1	1;1;1	NP_001101063.1 metal transporter CNNM1 [Rattus norvegicus];XP_008758648.1 PREDICTED: metal transporter CNNM1 isoform X2 [Rattus norvegicus];XP_006231545.1 PREDICTED: metal transporter CNNM1 isoform X1 [Rattus norvegicus]	3	1	1	1	0	0	0	0	0	0	0	1	0	0	0	0	0	0	0	0	1	0	0	0	0	0	0	0	0	1	0	1.5	1.5	1.5	66.129	584	584;923;970	1	1	0.00054387	2.1503	0	0	0
NP_001101066.1;XP_008758521.1;XP_008758520.1;XP_006231228.1;XP_006231226.1;XP_006231225.1	NP_001101066.1;XP_008758521.1;XP_008758520.1;XP_006231228.1;XP_006231226.1;XP_006231225.1	2;2;2;2;2;2	2;2;2;2;2;2	2;2;2;2;2;2	NP_001101066.1 transmembrane protein 2 [Rattus norvegicus];XP_008758521.1 PREDICTED: transmembrane protein 2 isoform X1 [Rattus norvegicus];XP_008758520.1 PREDICTED: transmembrane protein 2 isoform X1 [Rattus norvegicus];XP_006231228.1 PREDICTED: transmemb	6	2	2	2	0	1	1	0	1	1	1	1	1	0	1	1	0	1	1	1	1	1	0	1	1	0	1	1	1	1	1	1.8	1.8	1.8	152.74	1371	1371;1383;1383;1383;1383;1383	1	7	0.00037432	2.5755	0	0.9	0.9
NP_001101074.2	NP_001101074.2	14	14	14	NP_001101074.2 protein RRP5 homolog [Rattus norvegicus]	1	14	14	14	5	2	2	2	2	5	6	7	6	5	2	2	2	2	5	6	7	6	5	2	2	2	2	5	6	7	6	9.4	9.4	9.4	209.48	1876	1876	1	38	0	24.534	3.8	1.9	2.1
NP_001101083.1;XP_006256259.1;XP_008771035.1;XP_006256258.1;XP_006256257.1;XP_006256255.1;XP_008771036.1;XP_017457132.1;XP_008771037.1	NP_001101083.1;XP_006256259.1;XP_008771035.1;XP_006256258.1;XP_006256257.1;XP_006256255.1;XP_008771036.1;XP_017457132.1;XP_008771037.1	7;7;7;7;7;7;5;4;4	7;7;7;7;7;7;5;4;4	7;7;7;7;7;7;5;4;4	NP_001101083.1 ankyrin repeat and SAM domain-containing protein 1A [Rattus norvegicus];XP_006256259.1 PREDICTED: ankyrin repeat and SAM domain-containing protein 1A isoform X3 [Rattus norvegicus];XP_008771035.1 PREDICTED: ankyrin repeat and SAM domain-cont	9	7	7	7	3	2	0	3	2	1	3	3	2	3	2	0	3	2	1	3	3	2	3	2	0	3	2	1	3	3	2	8.1	8.1	8.1	122.1	1125	1125;1134;1149;1155;1167;1188;769;460;597	1	19	0	6.4937	3.7	2.6	0
NP_001101092.1;XP_017457144.1	NP_001101092.1;XP_017457144.1	1;1	1;1	1;1	NP_001101092.1 rho-related BTB domain-containing protein 1 [Rattus norvegicus];XP_017457144.1 PREDICTED: rho-related BTB domain-containing protein 1 isoform X1 [Rattus norvegicus]	2	1	1	1	0	1	0	0	0	0	0	0	0	0	1	0	0	0	0	0	0	0	0	1	0	0	0	0	0	0	0	4.3	4.3	4.3	78.782	695	695;757	1	1	0.0082699	1.0289	0	4.3	0
NP_001101096.1	NP_001101096.1	5	5	5	NP_001101096.1 2-aminoethanethiol dioxygenase [Rattus norvegicus]	1	5	5	5	2	0	0	1	2	2	2	2	1	2	0	0	1	2	2	2	2	1	2	0	0	1	2	2	2	2	1	25.4	25.4	25.4	28.448	256	256	1	14	0	5.9946	14.8	0	0
NP_001101101.1	NP_001101101.1	8	8	8	NP_001101101.1 Golgi-associated PDZ and coiled-coil motif-containing protein [Rattus norvegicus]	1	8	8	8	4	1	3	2	2	2	2	3	3	4	1	3	2	2	2	2	3	3	4	1	3	2	2	2	2	3	3	37	37	37	34.167	308	308	1	25	0	53.484	22.1	4.2	16.2
NP_001101103.1;XP_006256437.1	NP_001101103.1;XP_006256437.1	33;33	33;33	33;33	NP_001101103.1 GRIP and coiled-coil domain-containing protein 2 [Rattus norvegicus];XP_006256437.1 PREDICTED: GRIP and coiled-coil domain-containing protein 2 isoform X1 [Rattus norvegicus]	2	33	33	33	10	7	7	10	14	15	11	14	10	10	7	7	10	14	15	11	14	10	10	7	7	10	14	15	11	14	10	24.6	24.6	24.6	195.08	1679	1679;1681	1	102	0	114.85	7	6.5	6.4
NP_001101118.1;XP_006231909.1	NP_001101118.1;XP_006231909.1	2;2	2;2	2;2	NP_001101118.1 pentatricopeptide repeat-containing protein 2, mitochondrial [Rattus norvegicus];XP_006231909.1 PREDICTED: pentatricopeptide repeat-containing protein 2, mitochondrial isoform X1 [Rattus norvegicus]	2	2	2	2	0	0	0	0	0	1	0	1	0	0	0	0	0	0	1	0	1	0	0	0	0	0	0	1	0	1	0	2.9	2.9	2.9	43.897	381	381;394	1	2	0.000196	3.1886	0	0	0
NP_001101122.1	NP_001101122.1	4	4	4	NP_001101122.1 sorting nexin-18 [Rattus norvegicus]	1	4	4	4	1	2	1	1	4	2	2	3	2	1	2	1	1	4	2	2	3	2	1	2	1	1	4	2	2	3	2	8.6	8.6	8.6	67.866	615	615	1	23	0	14.883	2	4.7	2.8
NP_001101138.1;XP_008759149.1;XP_008759148.1;XP_006232326.1;XP_006232325.1;XP_003749315.1;XP_006232324.1;XP_006232323.1;XP_017446733.1;XP_008759184.1;XP_008759183.1;XP_008759182.1;XP_008759180.1;XP_008759179.1;XP_017446732.1	NP_001101138.1;XP_008759149.1;XP_008759148.1;XP_006232326.1;XP_006232325.1;XP_003749315.1;XP_006232324.1;XP_006232323.1;XP_017446733.1;XP_008759184.1;XP_008759183.1;XP_008759182.1;XP_008759180.1;XP_008759179.1;XP_017446732.1	3;3;3;3;3;3;3;3;2;2;2;2;2;2;2	3;3;3;3;3;3;3;3;2;2;2;2;2;2;2	3;3;3;3;3;3;3;3;2;2;2;2;2;2;2	NP_001101138.1 DCN1-like protein 1 [Rattus norvegicus];XP_008759149.1 PREDICTED: DCN1-like protein 1 isoform X4 [Rattus norvegicus];XP_008759148.1 PREDICTED: DCN1-like protein 1 isoform X4 [Rattus norvegicus];XP_006232326.1 PREDICTED: DCN1-like protein 1 i	15	3	3	3	1	2	1	1	1	1	1	2	1	1	2	1	1	1	1	1	2	1	1	2	1	1	1	1	1	2	1	16.4	16.4	16.4	24.059	207	207;244;244;244;244;259;264;273;172;172;172;172;187;192;201	1	12	0	62.74	8.2	11.6	8.2
NP_001101142.1	NP_001101142.1	2	2	2	NP_001101142.1 F-box only protein 4 [Rattus norvegicus]	1	2	2	2	1	0	0	0	1	1	0	1	0	1	0	0	0	1	1	0	1	0	1	0	0	0	1	1	0	1	0	4.4	4.4	4.4	48.572	431	431	1	4	0.00018857	2.6587	2.3	0	0
NP_001101144.1;XP_017446348.1;XP_008769148.1;XP_008768346.1;XP_008769147.1;XP_008768342.1	NP_001101144.1;XP_017446348.1	22;18;1;1;1;1	22;18;1;1;1;1	21;17;0;0;0;0	NP_001101144.1 N-alpha-acetyltransferase 15, NatA auxiliary subunit [Rattus norvegicus];XP_017446348.1 PREDICTED: N-alpha-acetyltransferase 15, NatA auxiliary subunit isoform X1 [Rattus norvegicus]	6	22	22	21	8	4	8	3	4	6	5	10	5	8	4	8	3	4	6	5	10	5	7	4	7	2	3	5	4	9	4	27.6	27.6	26.5	101.01	865	865;695;372;372;530;530	1	61	0	106.97	9.4	6.2	11.4
NP_001101148.1;XP_008759269.1	NP_001101148.1;XP_008759269.1	2;1	2;1	2;1	NP_001101148.1 ATP-dependent RNA helicase DHX36 [Rattus norvegicus];XP_008759269.1 PREDICTED: ATP-dependent RNA helicase DHX36 isoform X1 [Rattus norvegicus]	2	2	2	2	0	0	0	1	0	1	2	0	1	0	0	0	1	0	1	2	0	1	0	0	0	1	0	1	2	0	1	3.6	3.6	3.6	113.84	1000	1000;806	1	5	0	4.4078	0	0	0
NP_001101152.1;XP_008759312.1	NP_001101152.1;XP_008759312.1	1;1	1;1	1;1	NP_001101152.1 60S ribosomal export protein NMD3 [Rattus norvegicus];XP_008759312.1 PREDICTED: 60S ribosomal export protein NMD3 isoform X1 [Rattus norvegicus]	2	1	1	1	1	0	0	1	0	0	1	0	0	1	0	0	1	0	0	1	0	0	1	0	0	1	0	0	1	0	0	2.2	2.2	2.2	57.72	503	503;504	1	3	0.0063418	1.1287	2.2	0	0
NP_001101157.2	NP_001101157.2	8	7	7	NP_001101157.2 ras-related protein Rab-25 [Rattus norvegicus]	1	8	7	7	3	3	2	5	4	5	3	3	5	3	3	2	5	4	5	2	2	4	3	3	2	5	4	5	2	2	4	39.9	36.2	36.2	23.444	213	213	1	31	0	28.195	20.7	20.2	15.5
NP_001101158.1;XP_006232704.1	NP_001101158.1;XP_006232704.1	11;9	9;8	9;8	NP_001101158.1 ubiquilin-4 [Rattus norvegicus];XP_006232704.1 PREDICTED: ubiquilin-4 isoform X1 [Rattus norvegicus]	2	11	9	9	8	6	6	8	6	6	6	8	7	6	4	4	6	4	4	4	6	5	6	4	4	6	4	4	4	6	5	37.6	32.6	32.6	63.55	595	595;542	1	53	0	176.07	29.9	21.8	21.8
NP_001101170.1	NP_001101170.1	2	2	2	NP_001101170.1 proline-rich protein PRCC [Rattus norvegicus]	1	2	2	2	1	1	1	0	0	0	0	0	0	1	1	1	0	0	0	0	0	0	1	1	1	0	0	0	0	0	0	8.8	8.8	8.8	52.12	489	489	1	3	0.00018921	2.6978	4.7	4.1	4.1
NP_001101175.1	NP_001101175.1	3	3	3	NP_001101175.1 WD repeat-containing protein 3 [Rattus norvegicus]	1	3	3	3	1	0	0	0	0	1	0	0	1	1	0	0	0	0	1	0	0	1	1	0	0	0	0	1	0	0	1	6.4	6.4	6.4	106.07	942	942	1	3	0	4.0205	2.9	0	0
NP_001101184.1;XP_008759621.1;XP_006233176.1;XP_008759620.1;XP_008759619.1;XP_008759618.1	NP_001101184.1;XP_008759621.1;XP_006233176.1;XP_008759620.1;XP_008759619.1;XP_008759618.1	1;1;1;1;1;1	1;1;1;1;1;1	1;1;1;1;1;1	NP_001101184.1 DENN domain-containing protein 2D [Rattus norvegicus];XP_008759621.1 PREDICTED: DENN domain-containing protein 2D isoform X5 [Rattus norvegicus];XP_006233176.1 PREDICTED: DENN domain-containing protein 2D isoform X4 [Rattus norvegicus];XP_00	6	1	1	1	1	0	0	1	0	0	0	0	0	1	0	0	1	0	0	0	0	0	1	0	0	1	0	0	0	0	0	3.9	3.9	3.9	53.101	466	466;471;476;481;541;546	1	2	0.00054725	2.2432	3.9	0	0
NP_001101198.1	NP_001101198.1	14	14	14	NP_001101198.1 rap1 GTPase-GDP dissociation stimulator 1 [Rattus norvegicus]	1	14	14	14	7	6	10	7	6	9	9	6	5	7	6	10	7	6	9	9	6	5	7	6	10	7	6	9	9	6	5	38.7	38.7	38.7	52.248	478	478	1	78	0	155.04	19	18.6	28.5
NP_001101210.1;XP_006234522.1;XP_006234521.1;XP_006234518.1;XP_006234516.1;XP_006234515.1;XP_006234514.1;XP_008760209.1;XP_006234520.1;XP_006234519.1	NP_001101210.1;XP_006234522.1;XP_006234521.1;XP_006234518.1;XP_006234516.1;XP_006234515.1;XP_006234514.1;XP_008760209.1;XP_006234520.1;XP_006234519.1	32;32;32;32;32;32;32;30;29;29	32;32;32;32;32;32;32;30;29;29	32;32;32;32;32;32;32;30;29;29	NP_001101210.1 catenin delta-1 [Rattus norvegicus];XP_006234522.1 PREDICTED: catenin delta-1 isoform X7 [Rattus norvegicus];XP_006234521.1 PREDICTED: catenin delta-1 isoform X6 [Rattus norvegicus];XP_006234518.1 PREDICTED: catenin delta-1 isoform X3 [Rattu	10	32	32	32	19	18	19	18	22	21	18	20	20	19	18	19	18	22	21	18	20	20	19	18	19	18	22	21	18	20	20	38.9	38.9	38.9	104.07	932	932;937;938;961;966;967;967;866;940;946	1	269	0	323.31	28.2	28.9	29.2
NP_001101211.1	NP_001101211.1	1	1	1	NP_001101211.1 mediator of RNA polymerase II transcription subunit 19 [Rattus norvegicus]	1	1	1	1	0	0	0	0	1	1	1	0	0	0	0	0	0	1	1	1	0	0	0	0	0	0	1	1	1	0	0	9.8	9.8	9.8	26.321	244	244	1	3	0.0001965	3.2425	0	0	0
NP_001101214.1	NP_001101214.1	21	21	21	NP_001101214.1 nuclear pore complex protein Nup160 [Rattus norvegicus]	1	21	21	21	9	8	8	8	9	7	7	8	10	9	8	8	8	9	7	7	8	10	9	8	8	8	9	7	7	8	10	22.3	22.3	22.3	155.5	1379	1379	1	80	0	102.65	9.3	8.7	9
NP_001101224.1	NP_001101224.1	2	2	2	NP_001101224.1 TNF receptor-associated factor 6 [Rattus norvegicus]	1	2	2	2	0	0	1	1	0	0	1	0	0	0	0	1	1	0	0	1	0	0	0	0	1	1	0	0	1	0	0	4.7	4.7	4.7	60.253	530	530	1	3	0.00019324	2.9828	0	0	2.3
NP_001101226.1	NP_001101226.1	8	8	8	NP_001101226.1 RNA cytidine acetyltransferase [Rattus norvegicus]	1	8	8	8	2	2	3	2	3	3	5	3	2	2	2	3	2	3	3	5	3	2	2	2	3	2	3	3	5	3	2	16	16	16	102.19	909	909	1	33	0	19.514	5.2	5.2	6.8
[truncated: 4,854 more rows]
[truncated: 54 more columns]

## Sheet:  Data processing 1
	Fasta headers	gene symbol	Protein Description	Number of proteins	Peptides	Razor + unique peptides	Unique peptides	MS/MS count 1_13per_F1_r1	MS/MS count 1_13per_F1_r2	MS/MS count 1_13per_F1_r3	MS/MS count 2_13per_F1_r1	MS/MS count 2_13per_F1_r2	MS/MS count 2_13per_F1_r3	MS/MS count 3_13per_F1_r1	MS/MS count 3_13per_F1_r2	MS/MS count 3_13per_F1_r3	MS/MS count	iBAQ	iBAQ-C1	iBAQ-C2	iBAQ-C3	iBAQ-M1	iBAQ-M2	iBAQ-M3	iBAQ-S1	iBAQ-S2	iBAQ-S3	iTOF-C1	iTOF-C2	iTOF-C3	iTOF-M1	iTOF-M2	iTOF-M3	iTOF-S1	iTOF-S2	iTOF-S3	AVERAGE	SD	CV	P1	P2	C	M	S
[truncated: 6,111 more rows]

[truncated: 2 more sheets:  Data processing 2,  Significantly regulated protei]
